# Supplementary material
Source: Research Square preprint supplement (doi:10.21203/rs.3.rs-9043045/v2)
Supplement: Supplementary file 1 [file 7918527616042d194620ad7e.xlsx]

## Sheet: Title page
	Supplementary data file 1: Acta Neuropathologica
	Early mitochondrial gene dysregulation precedes motor neuron degeneration in genomically humanised FUS mutant mice
	Georgia Price1,2, Graciana de Azambuja11, Chloe Williams3, David Thompson1,2, Charlotte Tibbit1, Zeinab Ali1,4, Adele Austin1, Mhoriam Ahmed6, Andrew Tosolini6,7,8, Anny Devoy5,6, Gemma F Codner1, Lydia Teboul1, Linda Greensmith6, Giampietro Schiavo6,9, Sandrine da Cruz11, Elizabeth MC Fisher1,6,*, Thomas J Cunningham1,10,*
	1. Mary Lyon Centre at MRC Harwell, Harwell, UK
	2. Nuffield Department of Clinical Neurosciences, University of Oxford, Oxford, UK
	3. Department of Medical and Translational Biology, Faculty of Medicine, Umeå University, Sweden
	4. Department of Physiology, Anatomy and Genetics, University of Oxford, Oxford, UK
	5. Dementia Research Institute, King's College London, London, UK
	6. UCL Queen Square Motor Neuron Disease Centre, Department of Neuromuscular Diseases, UCL Queen Square Institute of Neurology, UCL, London, UK
	7. Australian Institute for Bioengineering and Nanotechnology, University of Queensland, Brisbane, Australia
	8. School of Biomedical Sciences, Faculty of Health, Medicine and Behavioural Sciences, The University of Queensland, St Lucia, Australia.
	9. Dementia Research Institute, University College London, London, UK
	10. Institute of Prion Diseases, MRC Prion Unit, UCL, London, UK
	11. VIB-KU Leuven Center for Neuroscience (CNL), Department of Neurosciences, KU Leuven, Leuven Brain Institute, Belgium
	* Joint senior authors
	Corresponding author email: tom.cunningham@ucl.ac.uk

## Sheet: SC P525L
Spinal cord hFUS/hFUSP525L vs hFUS/hFUS	baseMean	log2FoldChange	lfcSE	stat	pvalue	padj	Gene_name_conversion	Gene type	mitochondrion (GO:0005739)
ENSMUSG00000092341	16728.7	0.382211	0.111678	3.42245	0.000620594	0.0610438	Malat1	lncRNA
ENSMUSG00000021268	9947.38	0.672834	0.131978	5.09809	3.43091e-07	0.00102893	Meg3	lncRNA
ENSMUSG00000040297	931.504	0.251195	0.0758635	3.31114	0.00092917	0.0693071	Suco	protein_coding
ENSMUSG00000033004	5188.32	0.210862	0.0636996	3.31026	0.000932106	0.0693071	Mycbp2	protein_coding
ENSMUSG00000101609	347.405	0.708529	0.157909	4.48695	7.22511e-06	0.00650043	Kcnq1ot1	lncRNA
ENSMUSG00000002265	9101.15	0.494745	0.14264	3.46849	0.000523383	0.0582542	Peg3	protein_coding
ENSMUSG00000034243	1288.98	0.394365	0.107455	3.67006	0.000242494	0.0436344	Golgb1	protein_coding
ENSMUSG00000030616	897.736	0.374449	0.121751	3.07552	0.00210135	0.0991677	Sytl2	protein_coding
ENSMUSG00000040407	1327.36	0.463367	0.10551	4.39171	1.12463e-05	0.00843193	Akap9	protein_coding
ENSMUSG00000035173	1735.73	0.452766	0.130906	3.45871	0.000542774	0.0589794	Ccdc186	protein_coding
ENSMUSG00000067851	1946.15	0.296906	0.0965868	3.07398	0.00211226	0.0991677	Arfgef1	protein_coding
ENSMUSG00000028649	6830.87	0.365041	0.0959768	3.80343	0.000142704	0.0320976	Macf1	protein_coding
ENSMUSG00000030795	833.227	0.369977	0.0764872	4.83711	1.31739e-06	0.00198947	Fus	protein_coding
ENSMUSG00000038126	411.244	0.335709	0.100694	3.33395	0.000856217	0.0685433	Mphosph9	protein_coding
ENSMUSG00000034040	875.96	-0.315946	0.0985427	-3.20618	0.00134511	0.0823565	Galnt17	protein_coding
ENSMUSG00000030655	1486.4	0.197224	0.0642677	3.06878	0.00214935	0.0991677	Smg1	protein_coding
ENSMUSG00000026131	13774.6	0.473428	0.0800985	5.91057	3.40936e-09	3.0674e-05	Dst	protein_coding
ENSMUSG00000047036	1179.3	0.536961	0.150245	3.57392	0.000351682	0.0495627	Zfp445	protein_coding
ENSMUSG00000033705	374.756	0.392075	0.11187	3.50475	0.000457031	0.054104	Stard9	protein_coding
ENSMUSG00000024921	4784.53	0.259624	0.08032	3.23237	0.00122767	0.0772403	Smarca2	protein_coding
ENSMUSG00000034647	829.988	0.487551	0.148497	3.28323	0.00102625	0.0726173	Ankrd12	protein_coding
ENSMUSG00000070733	2512.62	0.187649	0.0579748	3.23673	0.00120908	0.0766064	Fryl	protein_coding
ENSMUSG00000020844	280.598	-0.347017	0.102303	-3.39204	0.000693752	0.0610438	Nxn	protein_coding
ENSMUSG00000006005	1600.41	0.36247	0.0820139	4.41962	9.8874e-06	0.00808699	Tpr	protein_coding
ENSMUSG00000037656	1390.79	-0.239812	0.0565946	-4.23736	2.26163e-05	0.0113044	Slc20a2	protein_coding
ENSMUSG00000034525	1168.65	0.331891	0.0966393	3.43433	0.000594024	0.0610438	Ice1	protein_coding
ENSMUSG00000002748	1465.23	0.34032	0.0994237	3.42293	0.0006195	0.0610438	Baz1b	protein_coding
ENSMUSG00000061755	1078.36	0.257653	0.0742956	3.46794	0.000524463	0.0582542	Bod1l	protein_coding
ENSMUSG00000024238	1768.26	0.282347	0.0791443	3.56749	0.000360416	0.0495627	Zeb1	protein_coding
ENSMUSG00000031924	3964.06	-0.203842	0.0421483	-4.8363	1.32277e-06	0.00198947	Cyb5b	protein_coding	mitochondrion
ENSMUSG00000037270	1990.96	0.316486	0.0800829	3.95198	7.75056e-05	0.0248409	Bltp1	protein_coding
ENSMUSG00000038039	1132.04	0.47973	0.121743	3.94051	8.131e-05	0.0248409	Gcc2	protein_coding
ENSMUSG00000012535	1141.92	0.206973	0.0622209	3.32642	0.000879693	0.0685433	Tnpo3	protein_coding
ENSMUSG00000025971	418.743	-0.342379	0.0990094	-3.45805	0.000544103	0.0589794	Maip1	protein_coding	mitochondrion
ENSMUSG00000027004	382.239	-0.349999	0.0969821	-3.6089	0.000307494	0.0493183	Frzb	protein_coding
ENSMUSG00000056608	1181.94	0.455387	0.138211	3.29486	0.000984698	0.0708746	Chd9	protein_coding
ENSMUSG00000049658	568.18	0.38896	0.0963817	4.03562	5.44573e-05	0.0204147	Bdp1	protein_coding
ENSMUSG00000035569	3689.94	0.193423	0.0574437	3.36718	0.000759418	0.0635165	Ankrd11	protein_coding
ENSMUSG00000053754	1675.88	0.303677	0.0865169	3.51003	0.000448049	0.054057	Chd8	protein_coding
ENSMUSG00000054387	1308.09	0.250503	0.0816206	3.06912	0.00214691	0.0991677	Mdm4	protein_coding
ENSMUSG00000019971	429.599	0.462735	0.127079	3.64131	0.000271254	0.0451939	Cep290	protein_coding
ENSMUSG00000036202	617.868	0.455787	0.132972	3.42769	0.00060873	0.0610438	Rif1	protein_coding
ENSMUSG00000032525	1483.28	0.454582	0.120586	3.76979	0.000163388	0.0343274	Nktr	protein_coding
ENSMUSG00000027346	2174.6	0.203822	0.0593199	3.43597	0.00059043	0.0610438	Gpcpd1	protein_coding
ENSMUSG00000007827	384.697	0.532793	0.161451	3.30003	0.000966744	0.0703094	Ankrd26	protein_coding
ENSMUSG00000030016	1302.99	0.460514	0.128712	3.57787	0.000346404	0.0495627	Zfp638	protein_coding
ENSMUSG00000021488	2191.71	0.368854	0.105131	3.50851	0.000450625	0.054057	Nsd1	protein_coding
ENSMUSG00000022035	567.109	0.413275	0.134573	3.07101	0.00213338	0.0991677	Ccdc25	protein_coding
ENSMUSG00000038170	3174.69	0.293558	0.0824326	3.56119	0.000369181	0.0495627	Pde4dip	protein_coding
ENSMUSG00000096054	3173.06	0.228917	0.0628603	3.64168	0.000270862	0.0451939	Syne1	protein_coding
ENSMUSG00000021327	478.759	0.452625	0.0971785	4.65767	3.19804e-06	0.0035966	Zkscan3	protein_coding
ENSMUSG00000057738	12810	0.404537	0.124519	3.2488	0.00115891	0.0744768	Sptan1	protein_coding
ENSMUSG00000005871	4420.57	0.310639	0.0977361	3.17834	0.00148121	0.087101	Apc	protein_coding
ENSMUSG00000034088	4355.85	0.262772	0.0777044	3.38169	0.000720422	0.0619329	Hdlbp	protein_coding
ENSMUSG00000096929	655.784	0.368176	0.111191	3.31121	0.000928919	0.0693071	A330023F24Rik	lncRNA
ENSMUSG00000060301	335.733	0.385652	0.123427	3.12454	0.00178082	0.0954963	2610008E11Rik	protein_coding
ENSMUSG00000013275	2263.77	-0.151916	0.0462967	-3.28135	0.00103312	0.0726173	Slc41a1	protein_coding
ENSMUSG00000028869	551.03	0.456873	0.123507	3.69917	0.000216305	0.0397162	Gnl2	protein_coding
ENSMUSG00000030138	377.322	0.469836	0.135071	3.47845	0.000504326	0.058172	Bms1	protein_coding
ENSMUSG00000012422	1096.94	-0.253516	0.0757552	-3.34651	0.000818347	0.0663303	Tmem167	protein_coding
ENSMUSG00000048279	2479.05	0.420795	0.104729	4.01794	5.87083e-05	0.0211279	Sacs	protein_coding
ENSMUSG00000021557	3608.84	0.342706	0.0918264	3.73211	0.00018988	0.0363479	Agtpbp1	protein_coding
ENSMUSG00000038587	2376.73	0.438866	0.101093	4.34123	1.4169e-05	0.00980605	Akap12	protein_coding
ENSMUSG00000075470	1075.48	-0.259582	0.0836799	-3.10208	0.00192164	0.0987942	Alg10b	protein_coding
ENSMUSG00000019726	1027.63	0.294404	0.0932887	3.15584	0.00160036	0.0899902	Lyst	protein_coding
ENSMUSG00000041258	880.923	0.219896	0.0671488	3.27476	0.00105753	0.0726306	Zfp236	protein_coding
ENSMUSG00000046351	410.084	0.326664	0.097046	3.36608	0.000762452	0.0635165	Zfp322a	protein_coding
ENSMUSG00000046230	813.281	0.424814	0.136892	3.10329	0.0019138	0.0987942	Vps13a	protein_coding
ENSMUSG00000032621	733.029	0.226152	0.0665562	3.39792	0.000679009	0.0610438	Srek1	protein_coding
ENSMUSG00000022791	4102	0.161308	0.0521009	3.09607	0.00196107	0.0991677	Tnk2	protein_coding
ENSMUSG00000015176	1042.42	0.325075	0.0969742	3.35218	0.000801781	0.0655784	Nolc1	protein_coding
ENSMUSG00000015597	1153.05	0.247049	0.0748157	3.3021	0.000959649	0.0703094	Zfp318	protein_coding
ENSMUSG00000064302	3350.82	0.192312	0.0610959	3.14771	0.00164557	0.0902757	Clasp1	protein_coding
ENSMUSG00000020070	1358.52	0.241714	0.0783056	3.08681	0.0020232	0.0991677	Rufy2	protein_coding
ENSMUSG00000063511	1455.67	0.175643	0.0554007	3.17042	0.00152218	0.0872299	Snrnp70	protein_coding
ENSMUSG00000021428	309.546	0.283783	0.0924483	3.06965	0.00214313	0.0991677	Riok1	protein_coding
ENSMUSG00000033943	1075.03	0.28629	0.091718	3.12141	0.00179984	0.0956784	Mga	protein_coding
ENSMUSG00000018707	13146.6	0.302993	0.0805459	3.76175	0.00016873	0.0345015	Dync1h1	protein_coding
ENSMUSG00000033904	1907.41	0.408567	0.122871	3.32516	0.000883669	0.0685433	Ccp110	protein_coding
ENSMUSG00000040481	2193.25	0.358476	0.0910748	3.93606	8.28306e-05	0.0248409	Bptf	protein_coding
ENSMUSG00000054280	789.505	0.525919	0.167959	3.13123	0.00174075	0.0943467	Prr14l	protein_coding
ENSMUSG00000035024	398.677	0.371726	0.114698	3.24091	0.00119148	0.0760265	Ncapd3	protein_coding
ENSMUSG00000003660	2239.4	0.290067	0.0814265	3.56232	0.000367593	0.0495627	Snrnp200	protein_coding
ENSMUSG00000038564	784.79	0.376452	0.102898	3.6585	0.000253693	0.0447544	Ift172	protein_coding
ENSMUSG00000071054	915.731	0.301289	0.088132	3.41861	0.000629413	0.0610438	Safb	protein_coding
ENSMUSG00000079614	828.661	-0.197844	0.0640859	-3.08716	0.00202077	0.0991677	Seh1l	protein_coding
ENSMUSG00000054708	459.217	0.270444	0.0802056	3.37188	0.000746566	0.0633666	Ankrd24	protein_coding
ENSMUSG00000018846	2678.6	-0.243315	0.0695589	-3.49796	0.000468827	0.0547796	Pank3	protein_coding
ENSMUSG00000044167	623.338	-0.27251	0.0802765	-3.39464	0.000687186	0.0610438	Foxo1	protein_coding
ENSMUSG00000032024	660.858	0.283779	0.0744175	3.81334	0.000137101	0.0317995	Clmp	protein_coding
ENSMUSG00000033900	1445.55	0.51196	0.151019	3.39003	0.000698845	0.0610438	Map9	protein_coding
ENSMUSG00000086370	423.227	0.467367	0.132373	3.53068	0.000414499	0.052373	Ftx	lncRNA
ENSMUSG00000056763	312.202	0.345314	0.108355	3.18687	0.00143821	0.0862641	Cspp1	protein_coding
ENSMUSG00000033157	682.068	-0.282682	0.0856776	-3.29937	0.00096903	0.0703094	Abhd10	protein_coding
ENSMUSG00000026790	540.252	0.380821	0.0991855	3.83948	0.000123293	0.0317946	Odf2	protein_coding
ENSMUSG00000001986	1574.73	0.312244	0.0919593	3.39545	0.000685148	0.0610438	Gria3	protein_coding
ENSMUSG00000024286	2022.3	-0.200027	0.0556737	-3.59285	0.000327085	0.0495627	Ccny	protein_coding
ENSMUSG00000021585	753.429	0.265229	0.0815421	3.25267	0.00114328	0.0740006	Cast	protein_coding
ENSMUSG00000020900	4453.17	0.686593	0.210976	3.25436	0.00113646	0.0740006	Myh10	protein_coding
ENSMUSG00000047412	668.412	-0.256697	0.0753381	-3.40727	0.00065616	0.0610438	Zbtb44	protein_coding
ENSMUSG00000037072	4866.07	-0.204243	0.0664932	-3.07164	0.0021289	0.0991677	Selenof	protein_coding
ENSMUSG00000022186	4972.1	0.12784	0.0390309	3.27536	0.00105526	0.0726306	Oxct1	protein_coding
ENSMUSG00000028906	2014.68	0.266093	0.0864473	3.07809	0.00208329	0.0991677	Epb41	protein_coding
ENSMUSG00000039218	7908.86	0.267872	0.0699986	3.82682	0.000129811	0.0317995	Srrm2	protein_coding
ENSMUSG00000045573	3778.03	-0.310919	0.0862526	-3.60475	0.000312454	0.0493183	Penk	protein_coding
ENSMUSG00000024943	435.858	0.334086	0.106124	3.14807	0.00164355	0.0902757	Smc5	protein_coding
ENSMUSG00000121179	1707.24	0.373332	0.120347	3.10213	0.00192134	0.0987942	Gm56999	lncRNA
ENSMUSG00000032555	357.889	0.365241	0.118747	3.07579	0.00209945	0.0991677	Topbp1	protein_coding
ENSMUSG00000051166	359.892	0.374255	0.116052	3.22488	0.00126026	0.078197	Eml5	protein_coding
ENSMUSG00000031446	1204.71	0.212341	0.0668601	3.1759	0.00149373	0.0872299	Cul4a	protein_coding
ENSMUSG00000039671	1975.54	0.260561	0.0539481	4.82985	1.36637e-06	0.00198947	Zmynd8	protein_coding
ENSMUSG00000025931	9158.49	-0.228701	0.0714336	-3.2016	0.00136669	0.0825242	Paqr8	protein_coding
ENSMUSG00000050088	431.185	-0.296917	0.0910827	-3.25987	0.00111465	0.0740006	1600012H06Rik	protein_coding
ENSMUSG00000030243	279.567	0.431416	0.127608	3.38078	0.000722791	0.0619329	Recql	protein_coding
ENSMUSG00000056267	331.918	0.311786	0.0982403	3.17371	0.00150504	0.0872299	Cep70	protein_coding
ENSMUSG00000040183	812.221	0.298069	0.0905452	3.29194	0.000994996	0.0710474	Ankrd6	protein_coding
ENSMUSG00000091474	401.174	0.451994	0.12394	3.64689	0.000265439	0.0451939	2610021A01Rik	protein_coding
ENSMUSG00000046138	1016.06	0.26835	0.077377	3.46809	0.000524172	0.0582542	Brd10	protein_coding
ENSMUSG00000025261	6669.34	0.150214	0.0384307	3.90868	9.2801e-05	0.0269333	Huwe1	protein_coding
ENSMUSG00000020124	1348.09	0.383436	0.117866	3.25315	0.00114135	0.0740006	Usp15	protein_coding
ENSMUSG00000022974	816.554	0.260666	0.0733672	3.5529	0.000381006	0.0495627	Paxbp1	protein_coding
ENSMUSG00000030231	608.838	0.245303	0.079843	3.07232	0.00212405	0.0991677	Plekha5	protein_coding
ENSMUSG00000025199	625.444	0.266162	0.0693365	3.8387	0.000123687	0.0317946	Chuk	protein_coding
ENSMUSG00000043391	1661.68	-0.262844	0.0852887	-3.08182	0.00205743	0.0991677	2510009E07Rik	protein_coding
ENSMUSG00000024045	750.811	0.294505	0.0829396	3.55083	0.000384013	0.0495627	Akap8	protein_coding
ENSMUSG00000047193	739.385	0.246683	0.0786009	3.13842	0.00169862	0.092621	Dync2h1	protein_coding
ENSMUSG00000079487	569.042	0.279085	0.0818158	3.41113	0.000646935	0.0610438	Med12	protein_coding
ENSMUSG00000024104	2223.46	0.304951	0.0932067	3.27177	0.00106877	0.072798	Washc2	protein_coding
ENSMUSG00000002957	2947.35	-0.148052	0.0478489	-3.09417	0.00197367	0.0991677	Ap2a2	protein_coding
ENSMUSG00000035311	2106.16	0.203075	0.0576426	3.523	0.000426689	0.052588	Gnptab	protein_coding
ENSMUSG00000021400	891.369	-0.256924	0.0752668	-3.41351	0.000641317	0.0610438	Wrnip1	protein_coding
ENSMUSG00000044224	710.874	0.332108	0.099954	3.32261	0.000891784	0.0685433	Dnajc21	protein_coding
ENSMUSG00000002625	798.064	0.265943	0.0708669	3.75272	0.00017493	0.0349742	Akap8l	protein_coding
ENSMUSG00000003031	1407.97	-0.219793	0.0623043	-3.52774	0.000419123	0.052373	Cdkn1b	protein_coding
ENSMUSG00000024044	11918.5	0.250393	0.0619426	4.04235	5.29188e-05	0.0204147	Epb41l3	protein_coding
ENSMUSG00000058192	647.55	0.375601	0.122083	3.0766	0.00209374	0.0991677	Zfp846	protein_coding
ENSMUSG00000049092	1292.79	-0.373162	0.119599	-3.12011	0.00180786	0.0956784	Gpr137c	protein_coding
ENSMUSG00000069601	14259.3	0.289512	0.0518728	5.5812	2.38866e-08	0.000107454	Ank3	protein_coding
ENSMUSG00000042557	626.302	0.230024	0.0726801	3.16488	0.00155147	0.0883454	Sin3a	protein_coding
ENSMUSG00000032826	16349.9	0.25047	0.0648998	3.85933	0.000113697	0.030998	Ank2	protein_coding
ENSMUSG00000036298	1416.34	-0.203381	0.0612276	-3.32172	0.000894636	0.0685433	Slc2a13	protein_coding
ENSMUSG00000024617	2912.01	-0.184531	0.0585294	-3.15279	0.00161719	0.0902757	Camk2a	protein_coding
ENSMUSG00000008348	3417.4	0.282531	0.0795921	3.54974	0.000385616	0.0495627	Ubc	protein_coding
ENSMUSG00000047098	265.796	0.323584	0.103575	3.12415	0.00178319	0.0954963	Rnf31	protein_coding
ENSMUSG00000047888	2061.46	0.302668	0.0892683	3.39054	0.000697546	0.0610438	Tnrc6b	protein_coding
ENSMUSG00000046404	357.861	-0.365314	0.118422	-3.08484	0.00203661	0.0991677	Yod1	protein_coding
ENSMUSG00000028411	412.305	0.324974	0.0862285	3.76876	0.000164063	0.0343274	Aptx	protein_coding
ENSMUSG00000004356	355.856	0.458925	0.1157	3.96649	7.29377e-05	0.0248409	Utp20	protein_coding
ENSMUSG00000087403	915.636	-0.319838	0.0975948	-3.27721	0.0010484	0.0726306	Kantr	protein_coding
ENSMUSG00000031980	4328.81	-0.407708	0.103266	-3.94814	7.87616e-05	0.0248409	Agt	protein_coding
ENSMUSG00000015222	21898.6	0.308282	0.0722193	4.2687	1.96619e-05	0.0111214	Map2	protein_coding
ENSMUSG00000017707	5970.25	-0.18807	0.0440716	-4.26738	1.9778e-05	0.0111214	Serinc3	protein_coding
ENSMUSG00000041720	4590.99	0.151921	0.04809	3.15909	0.00158263	0.0895532	Pi4ka	protein_coding
ENSMUSG00000033282	586.861	0.459196	0.141011	3.25645	0.00112814	0.0740006	Rpgrip1l	protein_coding
ENSMUSG00000039990	416.223	0.268764	0.0838298	3.20607	0.0013456	0.0823565	Edrf1	protein_coding
ENSMUSG00000047786	435.067	-0.487166	0.136335	-3.57329	0.00035252	0.0495627	Lix1	protein_coding
ENSMUSG00000002107	3130.67	-0.267699	0.0719854	-3.71879	0.000200177	0.0375207	Celf2	protein_coding
ENSMUSG00000027828	2873.69	-0.189727	0.0554634	-3.42077	0.000624444	0.0610438	Ssr3	protein_coding
ENSMUSG00000049047	275.462	0.458315	0.112291	4.08151	4.47438e-05	0.0182982	Armcx3	protein_coding
ENSMUSG00000032409	298.427	0.422957	0.0997041	4.24212	2.21417e-05	0.0113044	Atr	protein_coding
ENSMUSG00000032096	2399.34	-0.141178	0.0456246	-3.09435	0.00197248	0.0991677	Arcn1	protein_coding
ENSMUSG00000059602	500.67	0.329631	0.0864717	3.81201	0.000137844	0.0317995	Syn3	protein_coding
ENSMUSG00000100826	2322.86	0.443544	0.124023	3.57631	0.000348482	0.0495627	Snhg14	lncRNA
ENSMUSG00000039372	357.075	-0.334788	0.0876579	-3.81926	0.000133854	0.0317995	Marchf4	protein_coding
ENSMUSG00000051855	633.199	0.410158	0.122112	3.35888	0.000782601	0.0645969	Mest	protein_coding
ENSMUSG00000085133	567.923	0.289379	0.0929778	3.11234	0.00185608	0.0976557	B930095G15Rik	#N/A
ENSMUSG00000076617	1085.04	0.242656	0.0757614	3.2029	0.0013605	0.0825242	Ighm	IG_C_gene
ENSMUSG00000038855	4074.12	-0.270734	0.0787765	-3.43673	0.000588775	0.0610438	Itpkb	protein_coding
ENSMUSG00000021983	4696.78	0.300128	0.072848	4.11992	3.79011e-05	0.0171635	Atp8a2	protein_coding
ENSMUSG00000051098	818.119	-0.376187	0.0829443	-4.53542	5.74894e-06	0.00574703	Mblac2	protein_coding
ENSMUSG00000002910	285.98	-0.389088	0.113948	-3.41462	0.000638712	0.0610438	Arrdc2	protein_coding
ENSMUSG00000039801	775.722	0.367026	0.102832	3.56918	0.000358104	0.0495627	Cplane1	protein_coding
ENSMUSG00000035376	1170	-0.191294	0.0616521	-3.1028	0.00191701	0.0987942	Hacd2	protein_coding
ENSMUSG00000061762	655.058	-0.542592	0.112924	-4.80495	1.54788e-06	0.00198947	Tac1	protein_coding
ENSMUSG00000019874	792.677	-0.436101	0.101263	-4.3066	1.6578e-05	0.0106537	Fabp7	protein_coding
ENSMUSG00000000263	3428.7	0.560987	0.136215	4.11838	3.81537e-05	0.0171635	Glra1	protein_coding
ENSMUSG00000021313	2389.05	0.351893	0.0859314	4.09505	4.22084e-05	0.0180833	Ryr2	protein_coding
ENSMUSG00000113216	362.259	0.451282	0.116619	3.86971	0.000108967	0.0306367	Gm40841	lncRNA
ENSMUSG00000087620	271.086	0.403866	0.106687	3.78553	0.000153383	0.0336582	5330434G04Rik	lncRNA
ENSMUSG00000026259	1043.99	-0.29386	0.0784802	-3.74439	0.000180836	0.0353692	Ngef	protein_coding
ENSMUSG00000004366	2058.88	-0.255853	0.0704244	-3.63301	0.00028013	0.0458241	Sst	protein_coding
ENSMUSG00000035681	2285.14	-0.322276	0.0897451	-3.59102	0.000329388	0.0495627	Kcnc2	protein_coding
ENSMUSG00000027419	3684.65	-0.212553	0.0626592	-3.3922	0.000693338	0.0610438	Pcsk2	protein_coding
ENSMUSG00000036949	2580.53	-0.194338	0.0569985	-3.40953	0.000650757	0.0610438	Slc39a12	protein_coding
ENSMUSG00000052229	957.231	-0.240452	0.0724172	-3.32037	0.000898978	0.0685433	Gpr17	protein_coding
ENSMUSG00000039533	2702.43	-0.18052	0.054355	-3.32112	0.000896558	0.0685433	Mmd2	protein_coding
ENSMUSG00000022376	965.046	-0.384613	0.117625	-3.26982	0.00107615	0.072798	Adcy8	protein_coding
ENSMUSG00000048251	350.689	-0.309232	0.0948765	-3.25931	0.00111683	0.0740006	Bcl11b	protein_coding
ENSMUSG00000024502	540.18	0.392885	0.121793	3.22584	0.00125603	0.078197	Jakmip2	protein_coding
ENSMUSG00000062296	1906.41	0.248875	0.0781656	3.18394	0.00145286	0.0865655	Trank1	protein_coding
ENSMUSG00000046178	1262.91	-0.249621	0.0784768	-3.18082	0.00146858	0.0869262	Nxph1	protein_coding
ENSMUSG00000028172	449.424	-0.331913	0.104648	-3.17171	0.00151543	0.0872299	Tacr3	protein_coding
ENSMUSG00000036766	3873.31	-0.208362	0.0661219	-3.15117	0.00162616	0.0902757	Dner	protein_coding
ENSMUSG00000046159	403.822	-0.411635	0.134068	-3.07034	0.00213812	0.0991677	Chrm3	protein_coding
ENSMUSG00000078591	350.748	-0.338776	0.110173	-3.07495	0.00210541	0.0991677	Hs3st4	protein_coding
ENSMUSG00000010277	5844.02	0.163026	0.0532258	3.0629	0.002192	0.10062	Bltp2	protein_coding
ENSMUSG00000028126	458.379	-0.271129	0.0886754	-3.05754	0.00223159	0.101402	Pip5k1a	protein_coding
ENSMUSG00000026335	3270.65	-0.223931	0.073213	-3.05863	0.00222353	0.101402	Pam	protein_coding
ENSMUSG00000038705	344.805	-0.265217	0.086857	-3.05349	0.00226194	0.102265	Gmeb2	protein_coding
ENSMUSG00000044447	959.961	0.291581	0.0956444	3.0486	0.00229912	0.103426	Dock5	protein_coding
ENSMUSG00000032867	794.607	-0.208942	0.0686044	-3.04561	0.00232208	0.103939	Fbxw8	protein_coding
ENSMUSG00000020530	1103.56	0.31214	0.102541	3.04405	0.00233413	0.103961	Ggnbp2	protein_coding
ENSMUSG00000024259	2392.53	-0.156689	0.0519074	-3.01862	0.00253928	0.104506	Slc25a46	protein_coding	mitochondrion
ENSMUSG00000060371	4515.04	0.214455	0.0707628	3.03062	0.0024405	0.104506	Caln1	protein_coding
ENSMUSG00000024695	3372.35	-0.299279	0.0991848	-3.01738	0.00254968	0.104506	Zfp91	protein_coding
ENSMUSG00000038212	1404	-0.268999	0.0887584	-3.03069	0.00243997	0.104506	Mfsd14b	protein_coding
ENSMUSG00000020577	2698.69	-0.186492	0.0614789	-3.03343	0.00241788	0.104506	Tspan13	protein_coding
ENSMUSG00000026434	4674.98	-0.15291	0.0506569	-3.01855	0.00253989	0.104506	Nucks1	protein_coding
ENSMUSG00000041645	3648.61	0.147503	0.0486579	3.03144	0.00243392	0.104506	Ddx24	protein_coding
ENSMUSG00000001440	3368.9	0.201915	0.0668039	3.0225	0.00250694	0.104506	Kpnb1	protein_coding
ENSMUSG00000034252	1473.53	0.214852	0.070884	3.03103	0.00243718	0.104506	Senp6	protein_coding
ENSMUSG00000030451	3241.96	0.230538	0.0761547	3.02724	0.00246798	0.104506	Herc2	protein_coding
ENSMUSG00000042104	479.8	0.236772	0.0785438	3.01453	0.0025738	0.104506	Uggt2	protein_coding
ENSMUSG00000094410	547.827	0.245827	0.0810688	3.03232	0.00242681	0.104506	Zbed6	protein_coding
ENSMUSG00000020315	17556	0.269784	0.0891719	3.02544	0.00248274	0.104506	Sptbn1	protein_coding
ENSMUSG00000040724	10511.9	0.277008	0.0919085	3.01395	0.00257866	0.104506	Kcna2	protein_coding
ENSMUSG00000022961	5062.24	0.307857	0.101963	3.01929	0.00253366	0.104506	Son	protein_coding
ENSMUSG00000063273	1143.93	0.311641	0.102828	3.03069	0.00243999	0.104506	Naa15	protein_coding
ENSMUSG00000014850	301.328	0.382938	0.126941	3.01666	0.00255577	0.104506	Msh3	protein_coding
ENSMUSG00000020075	374.416	0.452085	0.149532	3.02333	0.00250012	0.104506	Ddx21	protein_coding
ENSMUSG00000026339	519.512	0.463094	0.153034	3.02608	0.00247748	0.104506	Ccdc93	protein_coding
ENSMUSG00000039456	394.64	0.483993	0.159274	3.03874	0.00237573	0.104506	Morc3	protein_coding
ENSMUSG00000020064	518.224	0.23994	0.0796593	3.01208	0.00259464	0.104513	Herc4	protein_coding
ENSMUSG00000040850	895.286	0.266298	0.0884357	3.01121	0.00260208	0.104513	Psme4	protein_coding
ENSMUSG00000054477	833.593	-0.261324	0.0868865	-3.00765	0.00263278	0.105276	Kcnn2	protein_coding
ENSMUSG00000037533	882.972	0.316187	0.105213	3.00522	0.00265391	0.105651	Rapgef6	protein_coding
ENSMUSG00000049550	1489.46	0.361242	0.120264	3.00374	0.00266681	0.105697	Clip1	protein_coding
ENSMUSG00000029661	475.991	-0.402177	0.134194	-2.99698	0.00272666	0.10574	Col1a2	protein_coding
ENSMUSG00000019132	3560.74	-0.266478	0.0887952	-3.00103	0.00269064	0.10574	BC005537	protein_coding
ENSMUSG00000055943	2282.33	-0.229695	0.0765824	-2.99931	0.0027059	0.10574	Emc7	protein_coding
ENSMUSG00000039126	5319.6	0.241495	0.0805776	2.99706	0.00272601	0.10574	Prune2	protein_coding
ENSMUSG00000054263	2769.93	0.326436	0.108801	3.00031	0.00269707	0.10574	Lifr	protein_coding
ENSMUSG00000097767	588.006	0.355961	0.119428	2.98054	0.00287743	0.106309	Miat	lncRNA
ENSMUSG00000031596	2424.68	-0.288917	0.0969454	-2.9802	0.0028806	0.106309	Slc7a2	protein_coding
ENSMUSG00000000581	1143.06	-0.248251	0.0830419	-2.98946	0.0027947	0.106309	C1d	protein_coding
ENSMUSG00000020003	606.392	-0.227347	0.076001	-2.99137	0.0027773	0.106309	Pex7	protein_coding
ENSMUSG00000030718	2477.79	-0.222858	0.0745251	-2.99038	0.00278633	0.106309	Ppme1	protein_coding
ENSMUSG00000027864	633.83	-0.215527	0.0723868	-2.97743	0.00290675	0.106309	Ptgfrn	protein_coding
ENSMUSG00000022752	4165.96	-0.19652	0.0659473	-2.97995	0.00288295	0.106309	Tomm70a	protein_coding
ENSMUSG00000022664	1739.41	-0.188481	0.0632989	-2.97763	0.00290488	0.106309	Slc35a5	protein_coding
ENSMUSG00000037996	12031.9	0.253855	0.0849742	2.98743	0.00281333	0.106309	Slc24a2	protein_coding
ENSMUSG00000037736	2776.04	0.260385	0.0873178	2.98204	0.00286332	0.106309	Limch1	protein_coding
ENSMUSG00000031229	1626.8	0.263309	0.0882552	2.9835	0.00284973	0.106309	Atrx	protein_coding
ENSMUSG00000036591	2736.69	0.263442	0.088472	2.97769	0.00290429	0.106309	Arhgap21	protein_coding
ENSMUSG00000037341	807.649	0.313492	0.104712	2.99385	0.00275478	0.106309	Slc9a7	protein_coding
ENSMUSG00000045875	386.137	0.363071	0.12163	2.98505	0.0028353	0.106309	Adra1a	protein_coding
ENSMUSG00000022054	20658.9	0.285059	0.0957911	2.97584	0.00292183	0.106428	Nefm	protein_coding
ENSMUSG00000023977	1698.89	0.253154	0.0851428	2.97329	0.00294629	0.106886	Ubr2	protein_coding
ENSMUSG00000044197	525.23	-0.240071	0.0809443	-2.96588	0.00301816	0.108185	Gpr146	protein_coding
ENSMUSG00000031563	829.691	-0.21521	0.0725373	-2.96689	0.0030083	0.108185	Wwc2	protein_coding
ENSMUSG00000024483	725.421	0.300317	0.101207	2.96735	0.00300377	0.108185	Ankhd1	protein_coding
ENSMUSG00000028249	3521.79	-0.147968	0.0499141	-2.96444	0.00303231	0.108261	Sdcbp	protein_coding
ENSMUSG00000028645	3315.5	-0.179589	0.0606658	-2.9603	0.00307342	0.108437	Slc2a1	protein_coding
ENSMUSG00000024587	4377.82	0.237018	0.0800468	2.96099	0.00306652	0.108437	Nars1	protein_coding
ENSMUSG00000034610	565.721	0.28246	0.0953915	2.96107	0.00306577	0.108437	Tut4	protein_coding
ENSMUSG00000067578	509.546	-0.428997	0.14519	-2.95473	0.00312947	0.108647	Cbln4	protein_coding
ENSMUSG00000038206	606.633	-0.316959	0.107309	-2.95372	0.00313974	0.108647	Fbxo8	protein_coding
ENSMUSG00000026510	1072.29	-0.189784	0.0642432	-2.95415	0.0031353	0.108647	Trp53bp2	protein_coding
ENSMUSG00000029062	776.476	0.296883	0.100466	2.95506	0.00312608	0.108647	Cdk11b	protein_coding
ENSMUSG00000056050	2333.76	0.299618	0.101338	2.95661	0.00311042	0.108647	Mia3	protein_coding
ENSMUSG00000025280	672.291	0.221059	0.074989	2.94788	0.00319956	0.110293	Polr3a	protein_coding
ENSMUSG00000022679	1134.62	-0.190874	0.0648265	-2.94439	0.00323592	0.111017	Mpv17l	protein_coding
ENSMUSG00000032740	1802.26	0.362527	0.123162	2.9435	0.00324525	0.111017	Ccdc88a	protein_coding
ENSMUSG00000034472	416.274	-0.2691	0.0916281	-2.93687	0.00331544	0.112989	Rasd2	protein_coding
ENSMUSG00000031365	1159.86	-0.221189	0.0753903	-2.93392	0.00334712	0.113638	Zfp275	protein_coding
ENSMUSG00000062373	2625.26	-0.238295	0.0815767	-2.92112	0.00348779	0.117797	Tmem65	protein_coding	mitochondrion
ENSMUSG00000026764	13449.8	0.264355	0.0905562	2.91924	0.00350891	0.117797	Kif5c	protein_coding
ENSMUSG00000012609	1762.96	0.169213	0.0579632	2.91931	0.00350806	0.117797	Ttll5	protein_coding
ENSMUSG00000032902	2063.67	-0.196837	0.0675095	-2.91569	0.00354901	0.117825	Slc16a1	protein_coding	mitochondrion
ENSMUSG00000089810	271.978	0.360629	0.123661	2.91626	0.00354252	0.117825	Gm16536	lncRNA
ENSMUSG00000037820	273.698	-0.285904	0.0979863	-2.9178	0.0035251	0.117825	Tgm2	protein_coding
ENSMUSG00000043090	324.996	0.402493	0.138139	2.91368	0.00357192	0.118149	Zfp866	protein_coding
ENSMUSG00000111080	1368.94	-0.165549	0.0568471	-2.91219	0.00358909	0.118282	Gm20300	lncRNA
ENSMUSG00000021413	1527.68	0.307382	0.105654	2.90933	0.0036221	0.118934	Prpf4b	protein_coding
ENSMUSG00000038156	2467.11	-0.223545	0.0768985	-2.90702	0.00364895	0.11938	Spon1	protein_coding
ENSMUSG00000044308	3484.5	0.179425	0.0617749	2.9045	0.00367846	0.11991	Ubr3	protein_coding
ENSMUSG00000039686	2306.35	-0.130082	0.044817	-2.90251	0.00370185	0.120237	Zer1	protein_coding
ENSMUSG00000078348	421.338	-0.284645	0.0981933	-2.89882	0.00374571	0.120395	Sf3b5	protein_coding
ENSMUSG00000052298	1988.62	-0.188892	0.0651139	-2.90094	0.00372041	0.120395	Cdc42se2	protein_coding
ENSMUSG00000055782	1109.89	0.246234	0.0849458	2.89872	0.00374687	0.120395	Abcd2	protein_coding
ENSMUSG00000024924	1183.26	0.367641	0.126989	2.89506	0.00379089	0.121376	Vldlr	protein_coding
ENSMUSG00000015709	4963.15	-0.128068	0.0442836	-2.892	0.00382801	0.121698	Arnt2	protein_coding
ENSMUSG00000022914	1521.33	0.265931	0.0919511	2.89209	0.00382686	0.121698	Brwd1	protein_coding
ENSMUSG00000041544	460.472	-0.232772	0.0808595	-2.87872	0.00399287	0.12345	Disp3	protein_coding
ENSMUSG00000058441	3424.51	0.173199	0.0601518	2.87937	0.00398475	0.12345	Panx2	protein_coding
ENSMUSG00000037788	710.867	-0.223383	0.0775843	-2.87922	0.00398654	0.12345	Vopp1	protein_coding
ENSMUSG00000058006	873.284	0.211547	0.0734625	2.87966	0.00398104	0.12345	Mdn1	protein_coding
ENSMUSG00000029439	709.558	0.213361	0.07404	2.8817	0.00395539	0.12345	Sfswap	protein_coding
ENSMUSG00000034709	1814.45	0.225099	0.0781403	2.88071	0.00396785	0.12345	Ppp1r21	protein_coding
ENSMUSG00000037876	1203.23	0.329729	0.114265	2.88565	0.00390605	0.12345	Jmjd1c	protein_coding
ENSMUSG00000025907	1755.39	0.350525	0.121603	2.88255	0.00394477	0.12345	Rb1cc1	protein_coding
ENSMUSG00000027080	820.251	-0.205613	0.0714678	-2.877	0.00401475	0.123701	Med19	protein_coding
ENSMUSG00000020132	3681.54	-0.136698	0.0475594	-2.87426	0.0040498	0.124355	Rab21	protein_coding
ENSMUSG00000096910	316.667	0.443334	0.154352	2.87222	0.00407596	0.124733	Zfp955b	protein_coding
ENSMUSG00000047976	6752.94	0.26747	0.0933387	2.86559	0.00416237	0.126945	Kcna1	protein_coding
ENSMUSG00000026987	905.373	0.404702	0.1414	2.86211	0.0042083	0.127912	Baz2b	protein_coding
ENSMUSG00000061911	2036.69	0.340944	0.119232	2.85949	0.00424318	0.128538	Myt1l	protein_coding
ENSMUSG00000052155	596.69	-0.23678	0.0828574	-2.85768	0.00426754	0.128842	Acvr2a	protein_coding
ENSMUSG00000060206	1109.58	0.230717	0.080844	2.85386	0.00431921	0.129966	Zfp462	protein_coding
ENSMUSG00000034158	2969.29	-0.20864	0.0733197	-2.84561	0.00443258	0.130447	Lrrc58	protein_coding
ENSMUSG00000020349	8873.64	-0.199846	0.0701878	-2.84731	0.00440906	0.130447	Ppp2ca	protein_coding
ENSMUSG00000118664	1596.47	-0.259553	0.0912322	-2.84497	0.00444158	0.130447	Tusc3	protein_coding
ENSMUSG00000028228	913.719	-0.208926	0.0734392	-2.84489	0.00444272	0.130447	Cpne3	protein_coding
ENSMUSG00000055447	3869.19	-0.168432	0.0592393	-2.84325	0.00446567	0.130447	Cd47	protein_coding
ENSMUSG00000021054	2028.7	-0.156534	0.0550328	-2.84437	0.00444991	0.130447	Sgpp1	protein_coding
ENSMUSG00000027668	1733.08	0.195578	0.0687242	2.84583	0.00442952	0.130447	Mfn1	protein_coding
ENSMUSG00000029202	1053.57	0.292928	0.102819	2.84897	0.00438612	0.130447	Pds5a	protein_coding
ENSMUSG00000056342	2649	0.305361	0.107374	2.84389	0.00445662	0.130447	Usp34	protein_coding
ENSMUSG00000020640	1421.85	0.347746	0.122461	2.83964	0.00451646	0.131504	Itsn2	protein_coding
ENSMUSG00000049800	646.473	-0.24635	0.0868375	-2.8369	0.00455536	0.131783	Sertad2	protein_coding
ENSMUSG00000027881	725.752	0.203531	0.071737	2.83719	0.00455126	0.131783	Prpf38b	protein_coding
ENSMUSG00000050890	301.477	0.298144	0.105249	2.83274	0.0046151	0.133083	Pdik1l	protein_coding
ENSMUSG00000041773	1802.82	-0.160167	0.0565741	-2.8311	0.00463889	0.133342	Enc1	protein_coding
ENSMUSG00000020521	318.296	-0.288592	0.102035	-2.82835	0.00467879	0.133635	Rnft1	protein_coding
ENSMUSG00000022772	1818.77	0.169574	0.0599368	2.82922	0.00466622	0.133635	Senp5	protein_coding
ENSMUSG00000052915	2137.38	0.138308	0.048958	2.82504	0.00472747	0.134598	Msl1	protein_coding
ENSMUSG00000032564	592.697	-0.280989	0.0996032	-2.82109	0.00478612	0.135511	Cpne4	protein_coding
ENSMUSG00000022263	3146.97	0.156589	0.0555112	2.82085	0.00478966	0.135511	Trio	protein_coding
ENSMUSG00000087301	321.689	0.30178	0.107289	2.81278	0.00491155	0.136969	Gm13629	lncRNA
ENSMUSG00000033965	395.918	-0.407389	0.144922	-2.81109	0.00493733	0.136969	Slc16a2	protein_coding
ENSMUSG00000024072	1178.57	-0.248132	0.0882281	-2.8124	0.00491739	0.136969	Yipf4	protein_coding
ENSMUSG00000019907	1573.23	0.142824	0.0507709	2.81311	0.00490642	0.136969	Ppp1r12a	protein_coding
ENSMUSG00000038145	1836.72	0.189766	0.0675432	2.80955	0.00496112	0.136969	Snrk	protein_coding
ENSMUSG00000039233	517.084	0.300966	0.106921	2.81484	0.00488017	0.136969	Tbce	protein_coding
ENSMUSG00000044676	1298.12	0.369375	0.131477	2.80943	0.00496297	0.136969	Zfp612	protein_coding
ENSMUSG00000074733	391.366	0.542842	0.19314	2.81062	0.00494466	0.136969	Zfp950	protein_coding
ENSMUSG00000064329	6096.9	0.24624	0.0880361	2.79703	0.00515747	0.137732	Scn1a	protein_coding
ENSMUSG00000032320	6260.98	-0.325371	0.116192	-2.80028	0.00510578	0.137732	Rcn2	protein_coding
ENSMUSG00000030255	358.5	-0.267081	0.0953917	-2.79983	0.00511294	0.137732	Sspn	protein_coding
ENSMUSG00000074698	843.338	-0.205724	0.073461	-2.80045	0.00510316	0.137732	Csnk2a1	protein_coding
ENSMUSG00000050199	552.443	-0.198552	0.0709179	-2.79975	0.00511426	0.137732	Lgr4	protein_coding
ENSMUSG00000010476	2685.89	-0.15871	0.056658	-2.8012	0.00509132	0.137732	Ebf3	protein_coding
ENSMUSG00000002052	2625.26	0.154198	0.0549762	2.80481	0.0050347	0.137732	Supt6	protein_coding
ENSMUSG00000019943	3019.93	0.287683	0.102798	2.79854	0.0051334	0.137732	Atp2b1	protein_coding
ENSMUSG00000041624	477.325	0.301077	0.107622	2.79755	0.00514926	0.137732	Gucy1a2	protein_coding
ENSMUSG00000042625	415.849	0.305901	0.10937	2.79693	0.00515902	0.137732	Safb2	protein_coding
ENSMUSG00000014195	1822.84	0.320606	0.11425	2.80617	0.00501348	0.137732	Dnajc7	protein_coding
ENSMUSG00000028373	691.163	-0.370929	0.132682	-2.79562	0.0051801	0.137886	Astn2	protein_coding
ENSMUSG00000044349	7965.92	0.346702	0.124155	2.79249	0.0052304	0.138252	Snhg11	lncRNA
ENSMUSG00000035401	772.091	0.226286	0.0810222	2.79289	0.00522395	0.138252	Emsy	protein_coding
ENSMUSG00000041220	1710.43	0.355327	0.127271	2.7919	0.00523995	0.138252	Elovl6	protein_coding
ENSMUSG00000053641	1360.52	0.299568	0.107431	2.78847	0.00529581	0.139317	Dennd4a	protein_coding
ENSMUSG00000022312	2149.76	-0.186125	0.0668066	-2.78602	0.00533593	0.139963	Eif3h	protein_coding
ENSMUSG00000031667	3316.2	0.263218	0.0945541	2.78379	0.00537283	0.140521	Aktip	protein_coding
ENSMUSG00000029776	1548.22	-0.242137	0.0870917	-2.78026	0.00543159	0.140701	Hibadh	protein_coding	mitochondrion
ENSMUSG00000042202	1425.85	-0.225236	0.0810554	-2.77879	0.00545615	0.140701	Slc35e2	protein_coding
ENSMUSG00000022848	1458.87	-0.196873	0.0708086	-2.78035	0.00543003	0.140701	Slc49a4	protein_coding
ENSMUSG00000074582	2098.94	0.144006	0.0518424	2.77776	0.00547355	0.140701	Arfgef2	protein_coding
ENSMUSG00000037234	2914.31	0.234271	0.0842033	2.7822	0.00539914	0.140701	Hook3	protein_coding
ENSMUSG00000011831	1469.41	0.286763	0.103221	2.77814	0.00546714	0.140701	Evi5	protein_coding
ENSMUSG00000005506	1984.62	-0.219609	0.0791461	-2.77473	0.00552478	0.141614	Celf1	protein_coding
ENSMUSG00000070327	380.99	0.303872	0.109603	2.77248	0.00556312	0.142192	Rnf213	protein_coding
ENSMUSG00000025278	955.297	0.232739	0.0839949	2.77087	0.0055907	0.142492	Flnb	protein_coding
ENSMUSG00000014349	1243.63	-0.173156	0.06253	-2.76917	0.00561991	0.142831	Ube2z	protein_coding
ENSMUSG00000018102	758.172	-0.248286	0.0898231	-2.76416	0.00570691	0.143022	H2bc4	protein_coding
ENSMUSG00000042390	2212.84	-0.256773	0.0928299	-2.76606	0.00567388	0.143022	Gatad2b	protein_coding
ENSMUSG00000004591	759.883	0.213625	0.0772668	2.76477	0.00569637	0.143022	Pkn2	protein_coding
ENSMUSG00000014355	1537.75	0.220792	0.0797894	2.76719	0.00565424	0.143022	Anapc1	protein_coding
ENSMUSG00000046311	452.825	0.368084	0.133092	2.76564	0.00568112	0.143022	Zfp62	protein_coding
ENSMUSG00000094910	743.172	-0.214838	0.0778629	-2.75918	0.0057946	0.144512	D430019H16Rik	protein_coding
ENSMUSG00000029778	4144.06	-0.165627	0.0600322	-2.75897	0.00579847	0.144512	Adcyap1r1	protein_coding
ENSMUSG00000022466	559.205	0.336698	0.122116	2.7572	0.0058298	0.144892	Rpap3	protein_coding
ENSMUSG00000020700	305.454	-0.296781	0.107828	-2.75235	0.00591692	0.14533	Map3k3	protein_coding
ENSMUSG00000069114	343.162	-0.260284	0.094605	-2.75128	0.00593637	0.14533	Zbtb10	protein_coding
ENSMUSG00000020300	3126.7	-0.238182	0.0865254	-2.75274	0.00590985	0.14533	Cpeb4	protein_coding
ENSMUSG00000041303	729.04	0.214411	0.0779438	2.75084	0.00594435	0.14533	Gtf3c3	protein_coding
ENSMUSG00000020220	1663.53	0.266574	0.0968452	2.75258	0.00591274	0.14533	Vps13d	protein_coding
ENSMUSG00000039756	291.261	0.511264	0.185758	2.75231	0.00591757	0.14533	Dnttip2	protein_coding
ENSMUSG00000056856	628.885	0.276521	0.100716	2.74555	0.0060409	0.147261	Jakmip3	protein_coding
ENSMUSG00000040928	821.076	-0.183435	0.0668533	-2.74384	0.00607247	0.147261	S100pbp	protein_coding
ENSMUSG00000030738	2672.12	0.340005	0.123887	2.74448	0.00606066	0.147261	Eif3c	protein_coding
ENSMUSG00000046314	1788.63	-0.213686	0.0780387	-2.7382	0.00617765	0.148214	Stxbp6	protein_coding
ENSMUSG00000022261	2633.78	-0.206224	0.0752958	-2.73885	0.00616551	0.148214	Sdc2	protein_coding
ENSMUSG00000030088	931.817	-0.18929	0.069107	-2.73908	0.00616107	0.148214	Aldh1l1	protein_coding
ENSMUSG00000039585	1899.86	0.317747	0.115969	2.73993	0.00614532	0.148214	Myo9a	protein_coding
ENSMUSG00000021675	527.71	-0.504652	0.184889	-2.72948	0.00634336	0.149474	F2rl2	protein_coding
ENSMUSG00000020160	569.086	-0.254251	0.0931016	-2.7309	0.00631623	0.149474	Meis1	protein_coding
ENSMUSG00000032324	6712.45	-0.124391	0.0455758	-2.72932	0.00634646	0.149474	Tspan3	protein_coding
ENSMUSG00000028890	755.779	0.192986	0.0707068	2.72938	0.00634539	0.149474	Mtf1	protein_coding
ENSMUSG00000021027	2856.28	0.236434	0.0864896	2.73367	0.00626324	0.149474	Ralgapa1	protein_coding
ENSMUSG00000078671	708.882	0.360894	0.132216	2.72959	0.0063414	0.149474	Chd2	protein_coding
ENSMUSG00000027288	5443.59	0.387483	0.141811	2.73238	0.00628786	0.149474	Zfp106	protein_coding
ENSMUSG00000030421	1016.26	-0.233652	0.0857476	-2.72488	0.00643242	0.15071	Uri1	protein_coding
ENSMUSG00000041245	1053.1	0.292176	0.107223	2.72493	0.00643148	0.15071	Wnk3	protein_coding
ENSMUSG00000019856	650.628	0.277906	0.10203	2.72376	0.00645429	0.150829	Fam184a	protein_coding
ENSMUSG00000024565	619.931	-0.203619	0.074803	-2.72207	0.00648747	0.150993	Sall3	protein_coding
ENSMUSG00000056493	706.294	-0.224883	0.0826261	-2.72169	0.00649488	0.150993	Foxk1	protein_coding
ENSMUSG00000022365	1389.04	-0.152944	0.0562348	-2.71974	0.00653333	0.151496	Derl1	protein_coding
ENSMUSG00000039904	5148.06	-0.289947	0.106852	-2.71353	0.00665705	0.152014	Gpr37	protein_coding
ENSMUSG00000097929	770.496	-0.202562	0.0746455	-2.71366	0.0066545	0.152014	Tunar	protein_coding
ENSMUSG00000039680	290.477	-0.289102	0.106509	-2.71435	0.00664057	0.152014	Mrps6	protein_coding
ENSMUSG00000027808	1506.27	-0.214825	0.0790494	-2.71761	0.00657563	0.152014	Serp1	protein_coding
ENSMUSG00000045435	454.988	-0.208797	0.0768579	-2.71667	0.00659422	0.152014	Tmem60	protein_coding
ENSMUSG00000044791	1166.05	0.280957	0.103497	2.71463	0.00663503	0.152014	Setd2	protein_coding
ENSMUSG00000020994	983.306	0.348113	0.12854	2.70821	0.00676479	0.154083	Pnn	protein_coding
ENSMUSG00000022604	585.378	0.271478	0.100366	2.70487	0.00683316	0.155247	Cep97	protein_coding
ENSMUSG00000057378	406.798	0.299293	0.110687	2.70397	0.00685168	0.155276	Ryr3	protein_coding
ENSMUSG00000046873	714.892	-0.182889	0.0677294	-2.70029	0.00692796	0.155334	Mbtps2	protein_coding
ENSMUSG00000024006	720.36	0.184269	0.0682593	2.69954	0.00694359	0.155334	Stk38	protein_coding
ENSMUSG00000025609	2407.97	0.220632	0.0817148	2.70003	0.00693329	0.155334	Mkln1	protein_coding
ENSMUSG00000028334	366.816	0.250462	0.0928427	2.6977	0.00698199	0.155334	Nans	protein_coding
ENSMUSG00000035284	1531.82	0.271636	0.100701	2.69744	0.00698742	0.155334	Vps13c	protein_coding
ENSMUSG00000040433	776.961	0.273235	0.101122	2.70203	0.00689177	0.155334	Zbtb38	protein_coding
ENSMUSG00000029250	1162.47	0.365583	0.135541	2.69721	0.00699238	0.155334	Polr2b	protein_coding
ENSMUSG00000050244	410.269	0.457296	0.169384	2.69976	0.00693889	0.155334	Heatr1	protein_coding
ENSMUSG00000021196	3932.9	0.170707	0.0633146	2.69616	0.00701436	0.155439	Pfkp	protein_coding
ENSMUSG00000018395	2849.36	0.148183	0.0549948	2.69449	0.00704958	0.155836	Kif3a	protein_coding
ENSMUSG00000085208	607.54	-0.274681	0.102007	-2.69277	0.00708604	0.156111	Brip1os	lncRNA
ENSMUSG00000033400	1782.94	0.185817	0.0690188	2.69227	0.00709674	0.156111	Agl	protein_coding
ENSMUSG00000032890	2762.4	-0.18154	0.0675032	-2.68935	0.00715913	0.157099	Rims3	protein_coding
ENSMUSG00000037851	1692.68	0.235141	0.0875523	2.68572	0.00723732	0.158429	Iars1	protein_coding
ENSMUSG00000021549	1332.02	0.219065	0.0816102	2.68428	0.00726854	0.158726	Rasa1	protein_coding
ENSMUSG00000043683	540.826	-0.206645	0.0770813	-2.68087	0.007343	0.159322	Fem1a	protein_coding	mitochondrion
ENSMUSG00000037653	519.727	-0.317277	0.118703	-2.67286	0.00752085	0.159322	Kctd8	protein_coding
ENSMUSG00000020704	968.389	-0.209055	0.0780742	-2.67765	0.00741417	0.159322	Asic2	protein_coding
ENSMUSG00000059146	2624.2	0.31763	0.118818	2.67325	0.00751207	0.159322	Ntrk3	protein_coding
ENSMUSG00000040452	437.098	0.37771	0.140975	2.67927	0.0073783	0.159322	Cdh12	protein_coding
ENSMUSG00000053253	2974.85	-0.198594	0.0743202	-2.67214	0.00753699	0.159322	Ndfip2	protein_coding
ENSMUSG00000037075	608.225	-0.196455	0.0734879	-2.67329	0.00751108	0.159322	Rnf139	protein_coding
ENSMUSG00000026466	1477.19	-0.19296	0.0721187	-2.67559	0.00745981	0.159322	Tor1aip1	protein_coding
ENSMUSG00000037111	5454.78	-0.127685	0.0477672	-2.67307	0.00751607	0.159322	Setd7	protein_coding
ENSMUSG00000027002	11649.6	0.103042	0.0385408	2.67358	0.00750466	0.159322	Nckap1	protein_coding
ENSMUSG00000017843	5549.52	0.167587	0.0626553	2.67475	0.00747841	0.159322	Ppp2r5c	protein_coding
ENSMUSG00000021448	1225.09	0.211261	0.0790519	2.67243	0.00753036	0.159322	Shc3	protein_coding
ENSMUSG00000025092	6208.24	0.214066	0.080165	2.67031	0.00757809	0.159322	Hspa12a	protein_coding
ENSMUSG00000057766	694.441	0.215561	0.0807714	2.66878	0.00761266	0.159322	Ankrd29	protein_coding
ENSMUSG00000035933	907.777	0.280202	0.104996	2.6687	0.0076146	0.159322	Cog5	protein_coding
ENSMUSG00000037608	1663.55	0.282577	0.105847	2.66967	0.00759265	0.159322	Bclaf1	protein_coding
ENSMUSG00000037487	2214.36	0.2924	0.109443	2.67172	0.00754644	0.159322	Ubr5	protein_coding
ENSMUSG00000020680	431.759	0.315658	0.118254	2.66933	0.00760034	0.159322	Taf15	protein_coding
ENSMUSG00000097119	311.885	0.477996	0.179186	2.6676	0.00763946	0.159472	B230354K17Rik	lncRNA
ENSMUSG00000022200	2430.99	-0.180346	0.0677483	-2.66201	0.00776765	0.161398	Golph3	protein_coding
ENSMUSG00000031021	2267.39	-0.153264	0.0575612	-2.66263	0.00775328	0.161398	Tmem9b	protein_coding
ENSMUSG00000037364	1307.85	0.166178	0.0624488	2.66103	0.00779028	0.161496	Srrt	protein_coding
ENSMUSG00000029422	1075.89	0.214907	0.080915	2.65595	0.00790843	0.163568	Rsrc2	protein_coding
ENSMUSG00000046111	346.762	0.35045	0.132084	2.65324	0.00797221	0.164509	Cep295	protein_coding
ENSMUSG00000048874	1174.73	0.233365	0.0880155	2.65141	0.00801571	0.165028	Phf3	protein_coding
ENSMUSG00000015733	5165.66	-0.183703	0.0693646	-2.64836	0.00808832	0.166143	Capza2	protein_coding
ENSMUSG00000058835	2429.29	-0.210654	0.0795658	-2.64755	0.00810775	0.166163	Abi1	protein_coding
ENSMUSG00000037965	485.577	0.275595	0.104181	2.64536	0.00816051	0.16635	Zc3h7a	protein_coding
ENSMUSG00000037355	278.973	0.283355	0.107162	2.64418	0.00818898	0.16635	Uvssa	protein_coding
ENSMUSG00000048118	491.101	0.300217	0.113542	2.6441	0.00819083	0.16635	Arid4a	protein_coding
ENSMUSG00000043535	1029.46	0.38957	0.147311	2.64454	0.00818011	0.16635	Setx	protein_coding
ENSMUSG00000032405	1576.04	-0.178458	0.0675143	-2.64327	0.00821102	0.166384	Pias1	protein_coding
ENSMUSG00000047213	1630.99	-0.185527	0.0702202	-2.64207	0.00824	0.166596	Ythdf3	protein_coding
ENSMUSG00000036825	1533.72	0.240009	0.0910154	2.63701	0.00836391	0.168722	Ssx2ip	protein_coding
ENSMUSG00000031647	1498.15	0.261038	0.0990425	2.63561	0.00839852	0.169041	Mfap3l	protein_coding
ENSMUSG00000060510	827.546	0.227112	0.086323	2.63095	0.0085146	0.170995	Zfp266	protein_coding
ENSMUSG00000021587	1010.51	-0.357401	0.136028	-2.62741	0.00860366	0.1712	Pcsk1	protein_coding
ENSMUSG00000056158	2308.2	-0.180531	0.0686819	-2.6285	0.00857611	0.1712	Car10	protein_coding
ENSMUSG00000005034	14796.7	-0.191499	0.0728671	-2.62806	0.00858722	0.1712	Prkacb	protein_coding
ENSMUSG00000028431	968.008	0.189955	0.0723151	2.62677	0.00861992	0.1712	Elp1	protein_coding
ENSMUSG00000021375	995.813	0.238093	0.0905928	2.62817	0.00858455	0.1712	Kif13a	protein_coding
ENSMUSG00000057421	421.58	0.322345	0.122777	2.62545	0.00865333	0.171485	Las1l	protein_coding
ENSMUSG00000035545	767.597	0.243194	0.0926808	2.62399	0.00869062	0.171845	Leng8	protein_coding
ENSMUSG00000051853	5766.81	-0.114958	0.0438855	-2.61949	0.00880609	0.173746	Arf3	protein_coding
ENSMUSG00000024983	1266.17	-0.1993	0.0762207	-2.61477	0.00892864	0.175779	Vti1a	protein_coding
ENSMUSG00000074971	317.498	-0.30261	0.11582	-2.61276	0.00898153	0.17605	Fibin	protein_coding
ENSMUSG00000028224	292.523	0.32576	0.12466	2.61319	0.00897016	0.17605	Nbn	protein_coding
ENSMUSG00000021022	332.756	0.281459	0.107989	2.60636	0.009151	0.178982	Ppp2r3c	protein_coding
ENSMUSG00000027977	458.347	0.284787	0.109507	2.60063	0.00930535	0.180906	Ndst3	protein_coding
ENSMUSG00000038762	1166.85	0.162159	0.0623506	2.60075	0.00930191	0.180906	Abcf1	protein_coding
ENSMUSG00000059975	283.992	0.286442	0.11015	2.60047	0.00930974	0.180906	Zfp74	protein_coding
ENSMUSG00000040543	764.73	-0.194109	0.0747275	-2.59756	0.00938884	0.18205	Pitpnm3	protein_coding
ENSMUSG00000048000	944.58	0.19545	0.075289	2.596	0.00943164	0.182487	Gigyf2	protein_coding
ENSMUSG00000022185	1476.01	0.150852	0.0582122	2.59142	0.00955804	0.184019	Acin1	protein_coding
ENSMUSG00000045983	5069.49	0.15513	0.0598915	2.59018	0.00959262	0.184019	Eif4g1	protein_coding
ENSMUSG00000037475	775.535	0.275779	0.106452	2.59064	0.00957963	0.184019	Thoc2	protein_coding
ENSMUSG00000039967	673.163	0.322496	0.124486	2.59062	0.00958023	0.184019	Zfp292	protein_coding
ENSMUSG00000031539	1459.82	-0.156297	0.0604373	-2.58609	0.00970706	0.185818	Ap3m2	protein_coding
ENSMUSG00000033342	801.647	-0.275796	0.106724	-2.5842	0.00976065	0.186052	Plppr5	protein_coding
ENSMUSG00000027710	464.818	0.205947	0.079684	2.58455	0.00975063	0.186052	Acad9	protein_coding
ENSMUSG00000026888	910.226	-0.277562	0.107465	-2.58282	0.00979977	0.186403	Grb14	protein_coding
ENSMUSG00000031610	572.663	-0.28282	0.109628	-2.57982	0.0098853	0.187221	Scrg1	protein_coding
ENSMUSG00000032666	1534.44	0.191726	0.0743074	2.58018	0.00987484	0.187221	1700025G04Rik	protein_coding
ENSMUSG00000042050	299.482	0.251086	0.0973974	2.57796	0.00993869	0.187221	Dync2i1	protein_coding
ENSMUSG00000043909	2155.94	0.263981	0.10241	2.57767	0.00994683	0.187221	Trp53bp1	protein_coding
ENSMUSG00000020389	282.658	0.310294	0.120372	2.5778	0.00994326	0.187221	Cdkl3	protein_coding
ENSMUSG00000027163	348.256	-0.226533	0.0879116	-2.57683	0.009971	0.187284	Commd9	protein_coding
ENSMUSG00000063873	1830.9	-0.195535	0.0759822	-2.57343	0.0100696	0.187807	Slc24a3	protein_coding
ENSMUSG00000035202	50077.4	-0.188339	0.0731656	-2.57414	0.0100489	0.187807	Lars2	protein_coding
ENSMUSG00000042410	1304.03	-0.172075	0.066871	-2.57323	0.0100754	0.187807	Agps	protein_coding
ENSMUSG00000038538	964.708	0.203827	0.0792398	2.57228	0.0101032	0.187807	Ubn2	protein_coding
ENSMUSG00000032212	697.243	0.284074	0.110435	2.57232	0.0101018	0.187807	Sltm	protein_coding
ENSMUSG00000057335	2000.61	0.256241	0.0996776	2.5707	0.0101493	0.187887	Cep170	protein_coding
ENSMUSG00000037890	438.754	0.337266	0.13118	2.57102	0.0101398	0.187887	Wdr19	protein_coding
ENSMUSG00000079184	830.308	0.406488	0.158257	2.56854	0.0102129	0.188676	Mphosph8	protein_coding
ENSMUSG00000022663	1183.39	-0.240814	0.0937968	-2.5674	0.0102464	0.188907	Atg3	protein_coding
ENSMUSG00000120732	1607.18	0.218382	0.085085	2.56663	0.0102692	0.188941	Gm56936	lncRNA
ENSMUSG00000009394	5291.49	-0.221499	0.086453	-2.56208	0.0104047	0.190554	Syn2	protein_coding
ENSMUSG00000022601	1372.34	0.156689	0.0611694	2.56156	0.0104204	0.190554	Zbtb11	protein_coding
ENSMUSG00000020598	3844	0.221048	0.0862598	2.56258	0.0103897	0.190554	Nrcam	protein_coding
ENSMUSG00000029502	1067.75	0.351284	0.13724	2.55964	0.0104782	0.191222	Golga3	protein_coding
ENSMUSG00000037470	1307.42	0.204652	0.0800597	2.55625	0.0105807	0.192313	Uggt1	protein_coding
ENSMUSG00000012640	291.946	0.383829	0.150141	2.55646	0.0105745	0.192313	Zfp715	protein_coding
ENSMUSG00000045216	1285.61	-0.151576	0.0593263	-2.55496	0.0106199	0.192636	Hs6st1	protein_coding
ENSMUSG00000044164	334.84	-0.229668	0.0899213	-2.5541	0.0106461	0.192723	Rnf182	protein_coding
ENSMUSG00000103472	353.568	-0.372825	0.146484	-2.54515	0.010923	0.196094	Pcdhga7	protein_coding
ENSMUSG00000030452	624.327	-0.238528	0.0936897	-2.54594	0.0108985	0.196094	Nipa2	protein_coding
ENSMUSG00000033184	3903.53	-0.122785	0.0482536	-2.54457	0.0109414	0.196094	Tmed7	protein_coding
ENSMUSG00000021916	373.349	0.281815	0.110678	2.54627	0.010888	0.196094	Glt8d1	protein_coding
ENSMUSG00000021245	458.747	0.348937	0.137006	2.54688	0.010869	0.196094	Mlh3	protein_coding
ENSMUSG00000050029	975.311	-0.233919	0.0920639	-2.54083	0.0110588	0.197719	Rap2c	protein_coding
ENSMUSG00000028437	1320.11	-0.150483	0.0592385	-2.54029	0.011076	0.197719	Ubap1	protein_coding
ENSMUSG00000010290	794.54	-0.186908	0.0736247	-2.53866	0.0111277	0.198249	AI597479	protein_coding
ENSMUSG00000039385	777.948	0.204005	0.0805259	2.5334	0.0112961	0.199814	Cdh6	protein_coding
ENSMUSG00000038650	502.141	-0.19743	0.0778913	-2.53468	0.011255	0.199814	Rnh1	protein_coding
ENSMUSG00000040731	4974.84	-0.105062	0.0414861	-2.53246	0.0113266	0.199814	Eif4h	protein_coding
ENSMUSG00000045962	9949.02	0.171189	0.0675757	2.5333	0.0112995	0.199814	Wnk1	protein_coding
ENSMUSG00000034574	1721.72	0.261297	0.103174	2.53259	0.0113224	0.199814	Daam1	protein_coding
ENSMUSG00000017119	2671.55	0.266341	0.105209	2.53154	0.0113564	0.199948	Nbr1	protein_coding
ENSMUSG00000025139	3024.48	-0.129136	0.0510849	-2.52788	0.0114754	0.201649	Tollip	protein_coding
ENSMUSG00000050953	8950.11	-0.229062	0.0906697	-2.52633	0.0115261	0.201917	Gja1	protein_coding
ENSMUSG00000020074	716.962	0.285781	0.113134	2.52604	0.0115356	0.201917	Ccar1	protein_coding
ENSMUSG00000041459	2870.11	0.19172	0.075954	2.52416	0.0115976	0.202609	Tardbp	protein_coding
ENSMUSG00000018425	652.703	-0.181761	0.0720393	-2.52308	0.011633	0.202834	Dhx40	protein_coding
ENSMUSG00000038084	3319.65	0.224713	0.0891663	2.52015	0.0117304	0.204136	Opa1	protein_coding
ENSMUSG00000005417	5382.03	0.137193	0.0544676	2.5188	0.0117755	0.204526	Mprip	protein_coding
ENSMUSG00000021721	459.488	-0.230903	0.0918686	-2.5134	0.0119573	0.206091	Htr1a	protein_coding
ENSMUSG00000008690	1416.71	-0.140918	0.0560401	-2.51458	0.0119173	0.206091	Ncaph2	protein_coding
ENSMUSG00000038241	471.69	0.269392	0.107165	2.51381	0.0119435	0.206091	Cep250	protein_coding
ENSMUSG00000007812	686.719	0.302387	0.120275	2.51414	0.0119325	0.206091	Zfp655	protein_coding
ENSMUSG00000001924	6927.51	-0.111547	0.0444066	-2.51196	0.0120064	0.206542	Uba1	protein_coding
ENSMUSG00000033799	488.979	0.37957	0.151161	2.51104	0.0120376	0.206683	Tasor2	protein_coding
ENSMUSG00000020859	9316.88	0.248835	0.0991324	2.51013	0.0120687	0.206824	Spag9	protein_coding
ENSMUSG00000047261	2250.11	-0.313789	0.125106	-2.50819	0.0121353	0.207336	Gap43	protein_coding
ENSMUSG00000040943	463.785	0.369635	0.147388	2.50791	0.0121447	0.207336	Tet2	protein_coding
ENSMUSG00000114797	881.094	-0.160364	0.0639984	-2.50575	0.0122193	0.207411	Gm49336	protein_coding
ENSMUSG00000012405	1268.74	0.169974	0.0678304	2.50586	0.0122153	0.207411	Rpl15	protein_coding
ENSMUSG00000032232	1702.41	0.255476	0.101982	2.50511	0.0122413	0.207411	Cgnl1	protein_coding
ENSMUSG00000030287	505.631	0.26753	0.106779	2.50545	0.0122296	0.207411	Itpr2	protein_coding
ENSMUSG00000029840	4292.71	-0.262455	0.104833	-2.50355	0.0122956	0.207938	Mtpn	protein_coding
ENSMUSG00000016831	1315.52	-0.22093	0.0883614	-2.5003	0.0124087	0.208676	Tox4	protein_coding
ENSMUSG00000046447	9625.44	-0.120124	0.0480367	-2.50068	0.0123956	0.208676	Camk2n1	protein_coding
ENSMUSG00000021945	1329.71	0.295839	0.118296	2.50084	0.0123901	0.208676	Zmym2	protein_coding
ENSMUSG00000001767	369.583	0.392992	0.157229	2.49949	0.0124372	0.208764	Crnkl1	protein_coding
ENSMUSG00000027613	373.57	-0.218744	0.0876321	-2.49617	0.0125544	0.209948	Eif6	protein_coding
ENSMUSG00000034593	7419.23	0.164185	0.065763	2.49662	0.0125383	0.209948	Myo5a	protein_coding
ENSMUSG00000051041	545.392	-0.256155	0.102682	-2.49465	0.0126082	0.209997	Olfml1	protein_coding
ENSMUSG00000033417	1637.45	-0.235485	0.0945265	-2.4912	0.0127312	0.209997	Cacul1	protein_coding
ENSMUSG00000025422	1364.05	-0.160914	0.0645922	-2.49123	0.0127301	0.209997	Agap2	protein_coding
ENSMUSG00000039270	4030.85	-0.140726	0.0566002	-2.48631	0.0129074	0.209997	Megf9	protein_coding
ENSMUSG00000029291	8103.57	0.169697	0.0682133	2.48774	0.0128559	0.209997	Rufy3	protein_coding
ENSMUSG00000047126	12711	0.175768	0.0705297	2.49211	0.0126986	0.209997	Cltc	protein_coding
ENSMUSG00000021111	2059.28	0.178246	0.0716592	2.48741	0.0128677	0.209997	Papola	protein_coding
ENSMUSG00000025995	473.397	0.191704	0.0770385	2.48842	0.0128313	0.209997	Wdr75	protein_coding
ENSMUSG00000022016	4688.79	0.236427	0.0948299	2.49316	0.012661	0.209997	Akap11	protein_coding
ENSMUSG00000058135	4701.5	0.242688	0.0974559	2.49023	0.012766	0.209997	Gstm1	protein_coding
ENSMUSG00000028414	1216.71	0.243558	0.0976706	2.49367	0.012643	0.209997	Fktn	protein_coding
ENSMUSG00000052812	486.824	0.248315	0.0998476	2.48694	0.0128848	0.209997	Atad2b	protein_coding
ENSMUSG00000022329	285.144	0.26555	0.106756	2.48745	0.0128664	0.209997	Stk3	protein_coding
ENSMUSG00000042487	397.406	0.363837	0.145898	2.49378	0.012639	0.209997	Leo1	protein_coding
ENSMUSG00000030469	297.151	0.423276	0.170023	2.48952	0.0127916	0.209997	Zfp719	protein_coding
ENSMUSG00000024897	4572.36	-0.165329	0.06653	-2.48503	0.0129539	0.210372	Apba1	protein_coding
ENSMUSG00000032036	708.263	-0.1956	0.0791483	-2.47131	0.013462	0.211423	Kirrel3	protein_coding
ENSMUSG00000036862	279.701	-0.338213	0.136624	-2.47551	0.0133044	0.211423	Dchs1	protein_coding
ENSMUSG00000019768	369.887	-0.299563	0.121183	-2.47199	0.0134364	0.211423	Esr1	protein_coding
ENSMUSG00000000753	272.998	-0.276028	0.111269	-2.48072	0.0131116	0.211423	Serpinf1	protein_coding
ENSMUSG00000020121	1016.21	-0.237224	0.0960188	-2.4706	0.0134886	0.211423	Srgap1	protein_coding
ENSMUSG00000066324	6680.56	-0.236824	0.0957193	-2.47415	0.0133555	0.211423	Bpnt2	protein_coding
ENSMUSG00000029128	1241.45	-0.234549	0.0948178	-2.47368	0.0133729	0.211423	Rab28	protein_coding
ENSMUSG00000098557	2053.38	-0.216932	0.0874474	-2.48071	0.013112	0.211423	Kctd12	protein_coding
ENSMUSG00000032418	1737.46	-0.208625	0.0841497	-2.47921	0.0131675	0.211423	Me1	protein_coding
ENSMUSG00000027429	1178.69	-0.174676	0.0704385	-2.47983	0.0131445	0.211423	Sec23b	protein_coding
ENSMUSG00000062098	2756.73	-0.170111	0.0688209	-2.4718	0.0134435	0.211423	Btbd3	protein_coding
ENSMUSG00000026374	1979.51	-0.13753	0.0556434	-2.47163	0.0134498	0.211423	Tsn	protein_coding
ENSMUSG00000020024	804.877	0.160654	0.064952	2.47342	0.0133826	0.211423	Cep83	protein_coding
ENSMUSG00000049470	4634.22	0.165668	0.0669384	2.47493	0.0133261	0.211423	Aff4	protein_coding
ENSMUSG00000029403	583.395	0.184206	0.0745439	2.47111	0.0134695	0.211423	Cdkl2	protein_coding
ENSMUSG00000038535	781.886	0.190553	0.0769352	2.4768	0.0132566	0.211423	Zfp280d	protein_coding
ENSMUSG00000039630	4732.05	0.202722	0.0820256	2.47145	0.0134567	0.211423	Hnrnpu	protein_coding
ENSMUSG00000040325	729.378	0.205024	0.0826217	2.48148	0.0130839	0.211423	Dcaf1	protein_coding
ENSMUSG00000033257	382.849	0.261147	0.105612	2.47271	0.0134093	0.211423	Ttll4	protein_coding
ENSMUSG00000022350	940.312	0.280953	0.113296	2.47981	0.0131452	0.211423	Washc5	protein_coding
ENSMUSG00000026469	3867.7	-0.172571	0.0699115	-2.46841	0.0135714	0.211982	Xpr1	protein_coding
ENSMUSG00000017412	4335.41	0.32123	0.130127	2.46859	0.0135648	0.211982	Cacnb4	protein_coding
ENSMUSG00000025272	3301.8	0.255462	0.103631	2.46512	0.0136968	0.212833	Tro	protein_coding
ENSMUSG00000042272	621.455	0.190823	0.0774018	2.46535	0.0136878	0.212833	Sestd1	protein_coding
ENSMUSG00000032119	287.355	0.308522	0.125116	2.46588	0.0136676	0.212833	Hinfp	protein_coding
ENSMUSG00000032523	389.666	-0.298587	0.12116	-2.46442	0.0137237	0.212883	Hhatl	protein_coding
ENSMUSG00000020034	542.941	-0.239505	0.0972893	-2.46178	0.013825	0.214085	Tcp11l2	protein_coding
ENSMUSG00000041935	2718.31	-0.216505	0.0880434	-2.45908	0.0139295	0.214483	Rimoc1	protein_coding
ENSMUSG00000030411	914.79	-0.197712	0.0804035	-2.459	0.0139325	0.214483	Nova2	protein_coding
ENSMUSG00000057236	2760.9	-0.150044	0.0610343	-2.45836	0.0139572	0.214483	Rbbp4	protein_coding
ENSMUSG00000048410	275.553	0.373721	0.15199	2.45885	0.0139381	0.214483	Zfp407	protein_coding
ENSMUSG00000036273	389.549	0.382449	0.155591	2.45804	0.0139699	0.214483	Lrrk2	protein_coding
ENSMUSG00000000631	3168.1	0.130911	0.0532768	2.45719	0.0140029	0.214624	Myo18a	protein_coding
ENSMUSG00000024073	2199.16	0.244839	0.0997496	2.45454	0.0141066	0.215846	Birc6	protein_coding
ENSMUSG00000040785	13894.6	0.312391	0.127336	2.45328	0.014156	0.216234	Ttc3	protein_coding
ENSMUSG00000033228	1751.82	0.224852	0.0917147	2.45165	0.0142203	0.216673	Scaf11	protein_coding
ENSMUSG00000021843	1652.91	0.331205	0.135112	2.45133	0.0142329	0.216673	Ktn1	protein_coding
ENSMUSG00000026617	1430.32	-0.160426	0.0655568	-2.44714	0.0143996	0.218222	Bpnt1	protein_coding
ENSMUSG00000040118	2160.95	-0.151114	0.0617565	-2.44694	0.0144075	0.218222	Cacna2d1	protein_coding
ENSMUSG00000038095	3076.31	0.174292	0.071226	2.44703	0.0144038	0.218222	Sbno1	protein_coding
ENSMUSG00000024887	1940.62	0.181119	0.07407	2.44525	0.0144753	0.218881	Asah2	protein_coding
ENSMUSG00000039943	2157.33	0.380708	0.15575	2.44436	0.014511	0.219052	Plcb4	protein_coding
ENSMUSG00000025437	3346.57	0.169132	0.0692268	2.44316	0.0145592	0.219413	Usp33	protein_coding
ENSMUSG00000004936	2773.98	-0.110042	0.0450992	-2.43999	0.0146875	0.220976	Map2k1	protein_coding
ENSMUSG00000038481	1799.46	-0.178935	0.073473	-2.43539	0.0148758	0.223062	Cdk19	protein_coding
ENSMUSG00000035517	967.061	0.154511	0.0634307	2.4359	0.0148549	0.223062	Tdrd7	protein_coding
ENSMUSG00000015968	565.502	0.223254	0.0917386	2.43359	0.0149498	0.223066	Cacna1d	protein_coding
ENSMUSG00000004151	1460.06	-0.274141	0.112649	-2.43358	0.0149504	0.223066	Etv1	protein_coding
ENSMUSG00000042323	1786.36	0.198066	0.0813671	2.43422	0.0149238	0.223066	Pbrm1	protein_coding
ENSMUSG00000008604	1681.38	0.133809	0.0549995	2.43291	0.0149779	0.223106	Ubqln4	protein_coding
ENSMUSG00000027854	899.941	0.185266	0.0761729	2.43218	0.0150083	0.223189	Sike1	protein_coding
ENSMUSG00000039298	664.791	0.44987	0.185026	2.43138	0.0150414	0.223313	Cdk5rap2	protein_coding
ENSMUSG00000070348	739.67	-0.227454	0.093642	-2.42898	0.0151415	0.224059	Ccnd1	protein_coding
ENSMUSG00000052534	2147.52	-0.128307	0.0528123	-2.4295	0.0151198	0.224059	Pbx1	protein_coding
ENSMUSG00000030987	1427	-0.223302	0.091976	-2.42782	0.0151897	0.224403	Stim1	protein_coding
ENSMUSG00000021991	1322.5	0.257974	0.106334	2.42608	0.0152628	0.224745	Cacna2d3	protein_coding
ENSMUSG00000021149	611.907	0.278409	0.114738	2.42647	0.0152466	0.224745	Gtpbp4	protein_coding
ENSMUSG00000083563	3812.4	0.136593	0.0563828	2.4226	0.01541	0.226542	Gm13340	unprocessed_pseudogene
ENSMUSG00000024039	593.388	-0.236547	0.0978103	-2.41843	0.0155877	0.226696	Cbs	protein_coding
ENSMUSG00000033022	323.411	-0.260219	0.10754	-2.41974	0.0155314	0.226696	Cdo1	protein_coding
ENSMUSG00000020627	777.872	-0.193702	0.0800521	-2.4197	0.0155335	0.226696	Klhl29	protein_coding
ENSMUSG00000057649	887.45	0.189635	0.0783317	2.42092	0.0154814	0.226696	Brd9	protein_coding
ENSMUSG00000041570	3389.05	0.214554	0.0886999	2.41887	0.0155686	0.226696	Camsap2	protein_coding
ENSMUSG00000057894	385.509	0.269457	0.111428	2.41822	0.0155968	0.226696	Zfp329	protein_coding
ENSMUSG00000024991	1751.37	0.318199	0.131569	2.4185	0.0155847	0.226696	Eif3a	protein_coding
ENSMUSG00000063015	3631.91	-0.228756	0.0946295	-2.41738	0.0156326	0.22685	Ccni	protein_coding
ENSMUSG00000006998	2937.66	0.107352	0.044469	2.41408	0.0157749	0.227443	Psmd2	protein_coding
ENSMUSG00000034160	3371.45	0.172598	0.0714916	2.41424	0.015768	0.227443	Ogt	protein_coding
ENSMUSG00000049164	308.347	0.281208	0.116515	2.4135	0.0157999	0.227443	Zfp518a	protein_coding
ENSMUSG00000022361	1250.83	0.290501	0.120335	2.41411	0.0157739	0.227443	Zhx1	protein_coding
ENSMUSG00000033991	401.771	0.31261	0.129481	2.41434	0.0157639	0.227443	Skic3	protein_coding
ENSMUSG00000004319	5222.6	-0.133823	0.0554681	-2.41262	0.0158383	0.227631	Clcn3	protein_coding
ENSMUSG00000078161	562.874	0.289024	0.119993	2.40868	0.0160105	0.229739	Erich3	protein_coding
ENSMUSG00000026305	487.522	0.264321	0.109772	2.4079	0.0160444	0.229859	Lrrfip1	protein_coding
ENSMUSG00000026142	384.818	-0.204089	0.0848655	-2.40486	0.0161788	0.231048	Rhbdd1	protein_coding
ENSMUSG00000022377	2516.12	0.157749	0.0655817	2.40538	0.0161556	0.231048	Asap1	protein_coding
ENSMUSG00000006740	9426.83	0.320662	0.133507	2.40184	0.016313	0.232597	Kif5b	protein_coding
ENSMUSG00000022314	4385.04	-0.143071	0.0595833	-2.40119	0.0163419	0.23264	Rad21	protein_coding
ENSMUSG00000013622	811.326	-0.17332	0.0722184	-2.39994	0.0163978	0.233066	Atraid	protein_coding
ENSMUSG00000022629	5826.44	0.216798	0.090414	2.39783	0.0164923	0.233738	Kif21a	protein_coding
ENSMUSG00000049804	670.782	0.400541	0.16705	2.39773	0.016497	0.233738	Armcx4	protein_coding
ENSMUSG00000001017	2237.42	-0.169801	0.0708915	-2.39522	0.0166103	0.234604	Chtop	protein_coding
ENSMUSG00000046434	575.555	0.277301	0.115748	2.39572	0.0165877	0.234604	Hnrnpa1	protein_coding
ENSMUSG00000061130	946.605	-0.147606	0.0616651	-2.39367	0.0166806	0.235227	Ppm1b	protein_coding
ENSMUSG00000031111	289.203	-0.537948	0.224856	-2.39241	0.016738	0.2353	Igsf1	protein_coding
ENSMUSG00000024810	2436.73	0.203427	0.0850287	2.39246	0.0167361	0.2353	Il33	protein_coding
ENSMUSG00000042115	482.374	-0.19319	0.0807719	-2.3918	0.0167659	0.235324	Klhdc8a	protein_coding
ENSMUSG00000028998	1367.46	-0.163531	0.0684195	-2.39013	0.0168425	0.235804	Tomm7	protein_coding
ENSMUSG00000047368	1131.77	-0.150668	0.0630432	-2.38991	0.0168525	0.235804	Abhd17b	protein_coding
ENSMUSG00000003526	330.164	-0.291318	0.121962	-2.38859	0.0169133	0.236288	Prodh	protein_coding
ENSMUSG00000032440	568.412	-0.228671	0.0957696	-2.38772	0.0169531	0.236348	Tgfbr2	protein_coding
ENSMUSG00000031134	777.879	-0.162062	0.0678834	-2.38735	0.0169702	0.236348	Rbmx	protein_coding
ENSMUSG00000027180	2637.65	-0.11653	0.0488268	-2.38659	0.0170054	0.236473	Fbxo3	protein_coding
ENSMUSG00000022240	2956.08	-0.235156	0.0986218	-2.38443	0.0171058	0.236559	Ctnnd2	protein_coding
ENSMUSG00000051185	1079.38	-0.284536	0.119477	-2.38151	0.0172418	0.236559	Fam174a	protein_coding
ENSMUSG00000032757	565.786	-0.208372	0.0874939	-2.38156	0.0172395	0.236559	Bet1	protein_coding
ENSMUSG00000021576	855.873	-0.173437	0.0727153	-2.38516	0.0170717	0.236559	Pdcd6	protein_coding
ENSMUSG00000055538	4010.24	-0.169921	0.0713346	-2.38203	0.0172173	0.236559	Zcchc24	protein_coding
ENSMUSG00000075703	1985.48	-0.168802	0.0708605	-2.38217	0.017211	0.236559	Selenoi	protein_coding
ENSMUSG00000041341	1280.24	0.141139	0.0592183	2.38338	0.0171547	0.236559	Atg2b	protein_coding
ENSMUSG00000000600	1074.24	0.154002	0.0646694	2.38137	0.0172483	0.236559	Krit1	protein_coding
ENSMUSG00000020817	2025.71	0.306861	0.128839	2.38174	0.0172311	0.236559	Rabep1	protein_coding
ENSMUSG00000030226	1074.67	-0.25688	0.108023	-2.37802	0.017406	0.237576	Lmo3	protein_coding
ENSMUSG00000024304	2660.04	-0.185507	0.0779701	-2.3792	0.0173502	0.237576	Cdh2	protein_coding
ENSMUSG00000032375	716.033	-0.162555	0.0683818	-2.37716	0.0174464	0.237576	Aph1b	protein_coding
ENSMUSG00000025544	2994.49	-0.138766	0.0583923	-2.37643	0.0174809	0.237576	Tm9sf2	protein_coding
ENSMUSG00000035770	7176.69	0.181966	0.0765651	2.37662	0.0174719	0.237576	Dync1li2	protein_coding
ENSMUSG00000038174	2771	0.217924	0.0916407	2.37803	0.0174056	0.237576	Hycc2	protein_coding
ENSMUSG00000036501	2823.46	0.164062	0.0690535	2.37586	0.017508	0.237586	Fam13b	protein_coding
ENSMUSG00000061751	827.825	0.191101	0.0804762	2.37462	0.0175669	0.238026	Kalrn	protein_coding
ENSMUSG00000068735	959.386	-0.183448	0.0772957	-2.37333	0.0176286	0.238052	Trp53i11	protein_coding
ENSMUSG00000027035	496.403	0.199586	0.0841296	2.37236	0.0176747	0.238052	Cers6	protein_coding
ENSMUSG00000020863	1866.87	0.26773	0.112849	2.37247	0.0176695	0.238052	Luc7l3	protein_coding
ENSMUSG00000041133	1051.11	0.390707	0.164618	2.37342	0.0176243	0.238052	Smc1a	protein_coding
ENSMUSG00000028030	437.221	-0.213942	0.0902068	-2.37169	0.0177072	0.238134	Tbck	protein_coding
ENSMUSG00000020899	506.485	-0.209969	0.0886646	-2.36813	0.0178785	0.240006	Pfas	protein_coding
ENSMUSG00000027665	2259.14	0.185634	0.0784032	2.36769	0.0178997	0.240006	Pik3ca	protein_coding
ENSMUSG00000031355	382.138	-0.333956	0.141324	-2.36306	0.0181248	0.24213	Arhgap6	protein_coding
ENSMUSG00000048833	1631.56	-0.190633	0.0806877	-2.3626	0.018147	0.24213	Slc39a9	protein_coding
ENSMUSG00000061273	1598.22	-0.129518	0.0547967	-2.36362	0.0180975	0.24213	Mmgt1	protein_coding
ENSMUSG00000025558	3046.37	0.283319	0.119938	2.36222	0.0181658	0.24213	Dock9	protein_coding
ENSMUSG00000039217	305.368	-0.313104	0.132626	-2.3608	0.0182357	0.242344	Il18	protein_coding
ENSMUSG00000024081	384.951	0.335711	0.142184	2.3611	0.018221	0.242344	Cebpz	protein_coding
ENSMUSG00000101111	3568.9	-0.214821	0.0910413	-2.35959	0.0182949	0.242532	Gm28437	unprocessed_pseudogene
ENSMUSG00000020516	877.438	0.189031	0.0801176	2.35941	0.0183038	0.242532	Rps6kb1	protein_coding
ENSMUSG00000033998	2560.95	-0.127881	0.0542446	-2.35749	0.0183987	0.243431	Kcnk1	protein_coding
ENSMUSG00000027849	963.897	-0.164162	0.0697326	-2.35416	0.0185646	0.244189	Syt6	protein_coding
ENSMUSG00000006262	999.348	-0.214209	0.0909848	-2.35434	0.0185555	0.244189	Mob1b	protein_coding
ENSMUSG00000027011	1441.24	-0.183685	0.0779906	-2.35522	0.0185119	0.244189	Ube2e3	protein_coding
ENSMUSG00000053347	408.013	0.331797	0.140865	2.35543	0.0185012	0.244189	Zfp943	protein_coding
ENSMUSG00000031642	344.995	-0.242645	0.103213	-2.35091	0.0187276	0.244191	Sh3rf1	protein_coding
ENSMUSG00000041040	1884.28	-0.239117	0.101625	-2.35293	0.0186259	0.244191	Fam117b	protein_coding
ENSMUSG00000029775	3135.97	-0.194534	0.0827303	-2.35143	0.0187015	0.244191	Klhdc10	protein_coding
ENSMUSG00000020536	1336.19	-0.155665	0.0661863	-2.35192	0.0186767	0.244191	Llgl1	protein_coding
ENSMUSG00000038773	911.204	-0.135552	0.057649	-2.35133	0.0187063	0.244191	Kdm3b	protein_coding
ENSMUSG00000030536	527.2	0.209916	0.0891984	2.35336	0.0186045	0.244191	Iqgap1	protein_coding
ENSMUSG00000040818	788.723	-0.230083	0.0980168	-2.34738	0.0189059	0.244566	Dennd6a	protein_coding
ENSMUSG00000038602	1592.19	-0.195882	0.0834592	-2.34704	0.018923	0.244566	Slc35f1	protein_coding
ENSMUSG00000028557	5362.99	-0.192523	0.0820621	-2.34606	0.0189728	0.244566	Rnf11	protein_coding
ENSMUSG00000024425	12759.1	-0.166401	0.0708528	-2.34854	0.0188471	0.244566	Ndfip1	protein_coding
ENSMUSG00000053646	1714.64	-0.157409	0.067003	-2.34928	0.0188099	0.244566	Plxnb1	protein_coding
ENSMUSG00000045180	2924.61	0.102214	0.0435447	2.34733	0.0189083	0.244566	Shroom2	protein_coding
ENSMUSG00000043183	270.46	0.31523	0.134367	2.34605	0.0189737	0.244566	Simc1	protein_coding
ENSMUSG00000024493	424.274	0.392411	0.167165	2.34744	0.0189029	0.244566	Lars1	protein_coding
ENSMUSG00000042460	756.873	-0.206133	0.0878937	-2.34525	0.0190143	0.244602	C1galt1	protein_coding
ENSMUSG00000024083	8192.45	0.245306	0.104611	2.34492	0.0190309	0.244602	Pja2	protein_coding
ENSMUSG00000022710	3005.64	0.182063	0.0776886	2.3435	0.0191039	0.245189	Usp7	protein_coding
ENSMUSG00000031983	2225.61	-0.194409	0.0830421	-2.34109	0.0192276	0.246019	2310022B05Rik	protein_coding
ENSMUSG00000021248	2690.47	-0.122053	0.0521365	-2.34102	0.0192312	0.246019	Tmed10	protein_coding
ENSMUSG00000024276	785.614	0.253478	0.108294	2.34064	0.0192505	0.246019	Zfp397	protein_coding
ENSMUSG00000048911	979.505	-0.206713	0.0883735	-2.33908	0.0193311	0.246698	Rnf24	protein_coding
ENSMUSG00000043702	594.932	-0.225891	0.0966647	-2.33685	0.0194469	0.247068	Pde12	protein_coding
ENSMUSG00000045211	327.214	-0.21965	0.0939488	-2.33797	0.0193886	0.247068	Nudt18	protein_coding
ENSMUSG00000068882	1575.22	0.20631	0.0883215	2.3359	0.0194966	0.247068	Ssb	protein_coding
ENSMUSG00000026048	364.106	0.209173	0.0895624	2.3355	0.0195173	0.247068	Ercc5	protein_coding
ENSMUSG00000059005	673.67	0.224742	0.0961908	2.33642	0.0194695	0.247068	Hnrnpa3	protein_coding
ENSMUSG00000035649	698.539	0.230709	0.0987895	2.33535	0.0195249	0.247068	Zcchc7	protein_coding
ENSMUSG00000040133	401.902	-0.241463	0.103451	-2.33409	0.0195912	0.247216	Gpr176	protein_coding
ENSMUSG00000062542	433.857	-0.199578	0.085509	-2.334	0.019596	0.247216	Syt9	protein_coding
ENSMUSG00000047146	361.887	0.310573	0.13309	2.33356	0.019619	0.247216	Tet1	protein_coding
ENSMUSG00000002496	2043.38	0.127968	0.0548807	2.33176	0.0197136	0.247292	Tsc2	protein_coding
ENSMUSG00000045482	2198.06	0.145596	0.0624512	2.33135	0.019735	0.247292	Trrap	protein_coding
ENSMUSG00000025133	578.755	0.269724	0.115653	2.33217	0.0196917	0.247292	Ints4	protein_coding
ENSMUSG00000021068	321.756	0.389158	0.16685	2.33239	0.0196804	0.247292	Nin	protein_coding
ENSMUSG00000037712	2399.7	0.130616	0.0560394	2.33079	0.0197646	0.247318	Fermt2	protein_coding
ENSMUSG00000029063	1006.87	-0.146836	0.0630243	-2.32983	0.0198149	0.247604	Nadk	protein_coding
ENSMUSG00000017421	2030.13	-0.166658	0.0716036	-2.32751	0.0199381	0.248454	Zfp207	protein_coding
ENSMUSG00000019841	853.352	0.265218	0.113931	2.32788	0.0199184	0.248454	Rev3l	protein_coding
ENSMUSG00000044807	855.479	0.224674	0.0965763	2.32639	0.0199979	0.248853	Zfp354c	protein_coding
ENSMUSG00000025791	2013.37	-0.111186	0.0478393	-2.32416	0.020117	0.24999	Pgm1	protein_coding
ENSMUSG00000044667	1051.88	-0.21418	0.0922275	-2.3223	0.0202167	0.250137	Plppr4	protein_coding
ENSMUSG00000027894	2903.94	-0.131262	0.0565266	-2.32213	0.0202261	0.250137	Slc6a17	protein_coding
ENSMUSG00000006699	5792.58	-0.121206	0.0522035	-2.3218	0.0202436	0.250137	Cdc42	protein_coding
ENSMUSG00000063334	496.598	0.28537	0.122933	2.32135	0.0202678	0.250137	Krr1	protein_coding
ENSMUSG00000000948	535.143	0.310905	0.133871	2.32242	0.0202103	0.250137	Gm38393	protein_coding
ENSMUSG00000030092	371.808	0.299661	0.129155	2.32017	0.0203315	0.250237	Cntn6	protein_coding
ENSMUSG00000027630	1986.81	0.137665	0.0593308	2.3203	0.0203248	0.250237	Tbl1xr1	protein_coding
ENSMUSG00000031137	1715.97	-0.24094	0.103952	-2.31779	0.0204605	0.25148	Fgf13	protein_coding
ENSMUSG00000032076	3105.07	-0.172135	0.0743235	-2.31603	0.0205566	0.252316	Cadm1	protein_coding
ENSMUSG00000026275	1870.61	0.242808	0.104873	2.31525	0.0205995	0.252498	Ppp1r7	protein_coding
ENSMUSG00000030084	1898.31	0.153101	0.0661805	2.31339	0.0207013	0.252818	Plxna1	protein_coding
ENSMUSG00000041268	3743.04	0.223256	0.0965125	2.31323	0.0207099	0.252818	Dmxl2	protein_coding
ENSMUSG00000025757	7343.61	0.251222	0.108558	2.31417	0.0206585	0.252818	Hspa4l	protein_coding
ENSMUSG00000097391	330.618	0.26543	0.11482	2.3117	0.0207942	0.253503	Mirg	lncRNA
ENSMUSG00000010392	1339.18	-0.181348	0.078478	-2.31082	0.0208429	0.253753	Gosr1	protein_coding
ENSMUSG00000054423	8362.94	0.126043	0.0546552	2.30614	0.0211026	0.253754	Cadps	protein_coding
ENSMUSG00000022053	866.676	-0.241277	0.104601	-2.30665	0.0210743	0.253754	Ebf2	protein_coding
ENSMUSG00000020334	403.897	-0.210952	0.0913673	-2.30883	0.0209529	0.253754	Slc22a4	protein_coding
ENSMUSG00000037887	1215.64	-0.160157	0.069382	-2.30833	0.0209807	0.253754	Dusp8	protein_coding
ENSMUSG00000043207	1287.98	-0.155143	0.0673003	-2.30524	0.0211532	0.253754	Zmpste24	protein_coding
ENSMUSG00000032127	1567.14	-0.152672	0.0661563	-2.30775	0.0210129	0.253754	Vps11	protein_coding
ENSMUSG00000032512	1005.91	0.179299	0.0776508	2.30904	0.0209415	0.253754	Wdr48	protein_coding
ENSMUSG00000020263	2055.75	0.184965	0.0801035	2.30908	0.0209392	0.253754	Appl2	protein_coding
ENSMUSG00000028576	306.693	0.222793	0.0966142	2.306	0.0211104	0.253754	Ift74	protein_coding
ENSMUSG00000056492	845.165	0.268937	0.116658	2.30535	0.0211471	0.253754	Adgrf5	protein_coding
ENSMUSG00000031592	1962.39	0.290216	0.125823	2.30655	0.02108	0.253754	Pcm1	protein_coding
ENSMUSG00000051495	1500.68	-0.126438	0.0548778	-2.30399	0.021223	0.254211	Irf2bp2	protein_coding
ENSMUSG00000042742	756.583	-0.196671	0.0853771	-2.30355	0.0212478	0.254211	Bmt2	protein_coding
ENSMUSG00000041235	447.292	0.250638	0.10887	2.30218	0.0213249	0.254794	Chd7	protein_coding
ENSMUSG00000024261	4467.95	-0.108215	0.0470412	-2.30043	0.0214236	0.255635	Syt4	protein_coding
ENSMUSG00000038332	736.317	-0.147186	0.0640448	-2.29817	0.021552	0.256825	Sesn1	protein_coding
ENSMUSG00000042035	584.383	-0.20051	0.0873645	-2.29509	0.0217279	0.25808	Igsf3	protein_coding
ENSMUSG00000021040	975.729	-0.162869	0.0709724	-2.29482	0.0217433	0.25808	Slirp	protein_coding
ENSMUSG00000024120	1372.9	0.278471	0.12133	2.29515	0.0217245	0.25808	Lrpprc	protein_coding
ENSMUSG00000013846	980.81	-0.191208	0.0835759	-2.28784	0.0221469	0.261278	St3gal1	protein_coding
ENSMUSG00000004221	783.792	-0.149275	0.0652495	-2.28776	0.0221516	0.261278	Ikbkg	protein_coding
ENSMUSG00000025321	5206.43	-0.138373	0.0604438	-2.28928	0.0220629	0.261278	Itgb8	protein_coding
ENSMUSG00000045767	2263.08	-0.128429	0.0561484	-2.2873	0.022178	0.261278	B230219D22Rik	protein_coding
ENSMUSG00000042426	657.517	0.172271	0.0753197	2.2872	0.0221842	0.261278	Dhx29	protein_coding
ENSMUSG00000001157	512.115	0.209605	0.0916447	2.28715	0.022187	0.261278	Gmcl1	protein_coding
ENSMUSG00000024642	1148.52	-0.257042	0.112437	-2.2861	0.0222485	0.261548	Tle4	protein_coding
ENSMUSG00000059708	315.123	0.356014	0.155753	2.28576	0.0222681	0.261548	Akap17b	protein_coding
ENSMUSG00000013663	2894.51	-0.226367	0.0990945	-2.28436	0.0223506	0.262176	Pten	protein_coding
ENSMUSG00000021301	3063.84	0.157179	0.0688221	2.28385	0.0223804	0.262182	Hecw1	protein_coding
ENSMUSG00000111375	609.99	0.299077	0.131028	2.28254	0.0224573	0.262742	Btbd8	protein_coding
ENSMUSG00000005609	1235.32	0.198095	0.0868385	2.28119	0.0225375	0.263337	Ctr9	protein_coding
ENSMUSG00000029190	1889.65	0.263984	0.115752	2.2806	0.0225724	0.263403	D5Ertd579e	protein_coding
ENSMUSG00000053774	1558.22	-0.160513	0.0704418	-2.27866	0.0226872	0.264384	Ubxn7	protein_coding
ENSMUSG00000021495	488.159	0.205689	0.0902862	2.27819	0.0227152	0.264384	Fam193b	protein_coding
ENSMUSG00000022814	339.181	-0.204093	0.0896265	-2.27716	0.0227769	0.264418	Umps	protein_coding
ENSMUSG00000032571	842.548	0.148997	0.0654297	2.27721	0.0227735	0.264418	Pik3r4	protein_coding
ENSMUSG00000075415	5893.78	0.174498	0.0767096	2.27479	0.0229188	0.265722	Fnbp1	protein_coding
ENSMUSG00000031198	1569.03	-0.220145	0.0968576	-2.27287	0.0230339	0.266713	Fundc2	protein_coding
ENSMUSG00000060373	2654.04	-0.168567	0.0742301	-2.27086	0.0231552	0.267773	Hnrnpc	protein_coding
ENSMUSG00000022416	955.298	-0.194659	0.0858328	-2.26789	0.0233359	0.26827	Cacna1i	protein_coding
ENSMUSG00000040147	588.494	-0.266058	0.117341	-2.2674	0.0233658	0.26827	Maob	protein_coding
ENSMUSG00000026675	1120.4	-0.181803	0.0801483	-2.26833	0.0233092	0.26827	Hsd17b7	protein_coding
ENSMUSG00000022139	8694.05	0.175736	0.0775284	2.26673	0.023407	0.26827	Mbnl2	protein_coding
ENSMUSG00000029309	50888.9	0.180998	0.0798357	2.26713	0.0233825	0.26827	Sparcl1	protein_coding
ENSMUSG00000027406	3599.65	0.216946	0.0956231	2.26877	0.0232826	0.26827	Idh3b	protein_coding
ENSMUSG00000027692	2007.02	0.232583	0.102537	2.26828	0.0233123	0.26827	Tnik	protein_coding
ENSMUSG00000045967	2385.82	-0.125022	0.0551793	-2.26575	0.0234667	0.268613	Gpr158	protein_coding
ENSMUSG00000029141	513.694	0.179082	0.0791485	2.26261	0.0236596	0.270477	Slc4a1ap	protein_coding
ENSMUSG00000032601	2203.44	-0.172482	0.0762892	-2.2609	0.0237656	0.271344	Prkar2a	protein_coding
ENSMUSG00000021379	3226.59	-0.207703	0.0920641	-2.25607	0.0240664	0.27443	Id4	protein_coding
ENSMUSG00000044528	653.892	-0.206319	0.0916169	-2.25198	0.0243235	0.274954	Tram1l1	protein_coding
ENSMUSG00000028033	484.495	-0.325953	0.144776	-2.25143	0.0243586	0.274954	Kcnq5	protein_coding
ENSMUSG00000039361	5814.26	-0.234047	0.103859	-2.25351	0.0242272	0.274954	Picalm	protein_coding
ENSMUSG00000025656	7586.97	-0.220955	0.0981843	-2.25041	0.0244232	0.274954	Arhgef9	protein_coding
ENSMUSG00000034501	821.064	-0.179258	0.0795773	-2.25262	0.0242829	0.274954	Pcnx4	protein_coding
ENSMUSG00000060743	591.943	-0.162324	0.0720615	-2.25258	0.0242858	0.274954	H3f3a	protein_coding
ENSMUSG00000025104	2466.59	-0.15685	0.0697258	-2.24953	0.024479	0.274954	Hdgfl3	protein_coding
ENSMUSG00000004360	1295.89	0.139201	0.0618715	2.24985	0.0244588	0.274954	9330159F19Rik	protein_coding
ENSMUSG00000039735	694.228	0.189501	0.0840981	2.25333	0.0242385	0.274954	Fnbp1l	protein_coding
ENSMUSG00000023106	743.77	0.252224	0.112028	2.25144	0.0243577	0.274954	Denr	protein_coding
ENSMUSG00000038774	337.89	0.258592	0.11481	2.25235	0.0243	0.274954	Ascc3	protein_coding
ENSMUSG00000041415	978.645	0.283481	0.125992	2.24999	0.0244493	0.274954	Dicer1	protein_coding
ENSMUSG00000033460	1301.52	0.228535	0.101648	2.2483	0.0245568	0.275483	Armcx1	protein_coding
ENSMUSG00000027361	371.805	-0.206465	0.0919153	-2.24625	0.024688	0.27661	Gabpb1	protein_coding
ENSMUSG00000032911	330.357	-0.243669	0.108509	-2.24561	0.0247291	0.276726	Cspg4	protein_coding
ENSMUSG00000030102	1320.53	0.273016	0.121614	2.24494	0.0247718	0.276859	Itpr1	protein_coding
ENSMUSG00000064360	9804.97	-0.179066	0.0799575	-2.23952	0.0251223	0.277816	mt-Nd3	protein_coding	mitochondrion
ENSMUSG00000031284	3489.04	0.169481	0.0756705	2.23973	0.0251084	0.277816	Pak3	protein_coding
ENSMUSG00000020134	1080.57	-0.205221	0.0915645	-2.24127	0.0250087	0.277816	Peli1	protein_coding
ENSMUSG00000025854	950.787	-0.159622	0.0712816	-2.23932	0.0251353	0.277816	Fam20c	protein_coding
ENSMUSG00000058325	1016.96	0.167334	0.0746318	2.24212	0.0249535	0.277816	Dock1	protein_coding
ENSMUSG00000054199	609.915	0.167407	0.0747061	2.24087	0.0250344	0.277816	Gon4l	protein_coding
ENSMUSG00000030447	2039.44	0.170788	0.076199	2.24134	0.0250038	0.277816	Cyfip1	protein_coding
ENSMUSG00000026219	3180.51	0.180135	0.0803828	2.24096	0.0250285	0.277816	Trip12	protein_coding
ENSMUSG00000020952	594.971	0.257819	0.115131	2.23935	0.0251331	0.277816	Scfd1	protein_coding
ENSMUSG00000025962	360.415	0.261956	0.117081	2.23739	0.0252608	0.278861	Fastkd2	protein_coding
ENSMUSG00000056515	3114.72	-0.161533	0.0722515	-2.23571	0.0253709	0.279733	Rab31	protein_coding
ENSMUSG00000022048	6524.75	-0.132078	0.059098	-2.2349	0.0254242	0.279952	Dpysl2	protein_coding
ENSMUSG00000030643	1486.16	0.19365	0.0866652	2.23446	0.025453	0.279952	Rab30	protein_coding
ENSMUSG00000032231	607.64	0.294964	0.132041	2.23388	0.0254908	0.280025	Anxa2	protein_coding
ENSMUSG00000025289	335.444	-0.268422	0.120299	-2.23129	0.0256621	0.280879	Prdx4	protein_coding
ENSMUSG00000068823	4545.28	0.154956	0.0694342	2.2317	0.0256351	0.280879	Csde1	protein_coding
ENSMUSG00000026977	1009.51	0.16224	0.0726992	2.23166	0.0256378	0.280879	Marchf7	protein_coding
ENSMUSG00000044505	529.98	0.284474	0.127641	2.2287	0.0258336	0.282186	Lingo4	protein_coding
ENSMUSG00000001786	906.378	-0.134372	0.0602958	-2.22854	0.0258443	0.282186	Fbxo7	protein_coding
ENSMUSG00000033382	1223.51	0.237918	0.106786	2.228	0.0258808	0.282242	Trappc8	protein_coding
ENSMUSG00000028248	2740.86	0.158894	0.0713697	2.22635	0.0259904	0.282752	Pnisr	protein_coding
ENSMUSG00000035614	1000.29	0.167074	0.075043	2.22637	0.0259893	0.282752	Togaram1	protein_coding
ENSMUSG00000098912	845.053	0.162367	0.0730118	2.22384	0.0261592	0.284244	1500004A13Rik	lncRNA
ENSMUSG00000029361	2252.01	-0.27514	0.123818	-2.22214	0.0262739	0.285147	Nos1	protein_coding	mitochondrion
ENSMUSG00000026495	397.688	0.343064	0.154422	2.22161	0.02631	0.285194	Efcab2	protein_coding
ENSMUSG00000027099	782.977	-0.223336	0.100849	-2.21454	0.0267914	0.287747	Mtx2	protein_coding	mitochondrion
ENSMUSG00000035864	5931.1	-0.17847	0.0806121	-2.21393	0.0268334	0.287747	Syt1	protein_coding
ENSMUSG00000039917	1198.73	-0.136403	0.0616062	-2.21411	0.0268212	0.287747	Rhbdd2	protein_coding
ENSMUSG00000002546	1654.35	0.112689	0.0508704	2.21523	0.0267445	0.287747	Golga2	protein_coding
ENSMUSG00000022024	2229.84	0.153277	0.0691564	2.21638	0.0266657	0.287747	Sugt1	protein_coding
ENSMUSG00000030347	445.936	0.198085	0.0894473	2.21454	0.0267915	0.287747	D6Wsu163e	protein_coding
ENSMUSG00000025019	427.881	0.205352	0.0926173	2.21721	0.0266088	0.287747	Lcor	protein_coding
ENSMUSG00000019906	400.212	0.235491	0.106278	2.2158	0.0267051	0.287747	Lin7a	protein_coding
ENSMUSG00000044033	343.288	0.264338	0.11931	2.21556	0.0267218	0.287747	Ccdc141	protein_coding
ENSMUSG00000031105	571.819	-0.195006	0.0881241	-2.21286	0.0269071	0.288195	Slc25a14	protein_coding
ENSMUSG00000047466	1213.45	-0.16527	0.0747289	-2.2116	0.0269946	0.288444	Ark2n	protein_coding
ENSMUSG00000026311	739.63	-0.149854	0.0677534	-2.21176	0.0269832	0.288444	Asb1	protein_coding
ENSMUSG00000034614	638.159	-0.179799	0.0814531	-2.20739	0.0272869	0.288891	Pik3ip1	protein_coding
ENSMUSG00000007880	2511.56	-0.164052	0.0742251	-2.2102	0.0270914	0.288891	Arid1a	protein_coding
ENSMUSG00000062762	1373.12	-0.151714	0.0686469	-2.21006	0.0271007	0.288891	Ei24	protein_coding
ENSMUSG00000023861	1043.55	-0.144779	0.0656048	-2.20684	0.0273253	0.288891	Mpc1	protein_coding
ENSMUSG00000030879	740.563	-0.138887	0.0629218	-2.2073	0.0272934	0.288891	Mrpl17	protein_coding
ENSMUSG00000009112	1085.62	-0.12809	0.0580309	-2.20727	0.027295	0.288891	Bcl2l13	protein_coding
ENSMUSG00000018909	6020.33	-0.110827	0.0501612	-2.20942	0.0271453	0.288891	Arrb1	protein_coding
ENSMUSG00000029686	2218.78	0.147945	0.0669724	2.20905	0.0271712	0.288891	Cul1	protein_coding
ENSMUSG00000036745	6879.02	0.238866	0.108218	2.20728	0.0272946	0.288891	Ttll7	protein_coding
ENSMUSG00000001424	1134.14	-0.180946	0.0820262	-2.20596	0.0273869	0.289201	Snd1	protein_coding
ENSMUSG00000029407	2650.93	0.163505	0.0741668	2.20456	0.0274847	0.289894	Uso1	protein_coding
ENSMUSG00000056851	5129.02	-0.198952	0.0903084	-2.20303	0.0275928	0.289928	Pcbp2	protein_coding
ENSMUSG00000044934	509.457	0.180945	0.0821454	2.20275	0.0276126	0.289928	Zfp367	protein_coding
ENSMUSG00000003226	1644.44	0.198597	0.090161	2.20269	0.0276168	0.289928	Ranbp2	protein_coding
ENSMUSG00000013736	586.5	0.25002	0.113467	2.20347	0.027562	0.289928	Trnt1	protein_coding
ENSMUSG00000036834	443.411	0.228344	0.103727	2.20139	0.0277083	0.290105	Plch1	protein_coding
ENSMUSG00000074794	2454.48	-0.131571	0.059788	-2.20062	0.0277626	0.290105	Arrdc3	protein_coding
ENSMUSG00000072501	1178.3	0.174457	0.0792745	2.20067	0.0277591	0.290105	Phf20l1	protein_coding
ENSMUSG00000071266	362.149	0.271875	0.123472	2.20191	0.0276719	0.290105	Zfp946	protein_coding
ENSMUSG00000042116	545.79	-0.187015	0.0850111	-2.1999	0.0278143	0.290308	Vwa1	protein_coding
ENSMUSG00000027698	2422.52	-0.126929	0.0578589	-2.19376	0.0282526	0.290705	Nceh1	protein_coding
ENSMUSG00000029569	450.11	-0.199604	0.0908742	-2.19649	0.028057	0.290705	Tmem168	protein_coding
ENSMUSG00000036902	1421.41	-0.191468	0.0871515	-2.19696	0.0280234	0.290705	Neto2	protein_coding
ENSMUSG00000022781	1931.51	-0.188054	0.085641	-2.19584	0.0281037	0.290705	Pak2	protein_coding
ENSMUSG00000029505	1805.46	0.112859	0.0514093	2.1953	0.0281423	0.290705	Ep400	protein_coding
ENSMUSG00000020694	1384.64	0.127669	0.0581367	2.19601	0.0280912	0.290705	Tlk2	protein_coding
ENSMUSG00000030465	2985.47	0.163517	0.0744648	2.1959	0.0280994	0.290705	Psd3	protein_coding
ENSMUSG00000026672	583.72	0.172639	0.078672	2.19442	0.0282051	0.290705	Optn	protein_coding
ENSMUSG00000037259	7805.55	0.197443	0.0898437	2.19763	0.0279758	0.290705	Dzank1	protein_coding
ENSMUSG00000024472	2928.99	0.214763	0.0978417	2.195	0.0281634	0.290705	Dcp2	protein_coding
ENSMUSG00000049321	279.962	0.279468	0.127393	2.19375	0.0282531	0.290705	Zfp2	protein_coding
ENSMUSG00000034163	515.008	0.284795	0.129604	2.19743	0.02799	0.290705	Zfc3h1	protein_coding
ENSMUSG00000025316	353.567	0.342707	0.156239	2.19349	0.0282724	0.290705	Banp	protein_coding
ENSMUSG00000032470	2025.88	-0.104614	0.0477271	-2.19191	0.0283857	0.290895	Mras	protein_coding
ENSMUSG00000032580	1872.6	0.169002	0.0771036	2.19188	0.0283879	0.290895	Rbm5	protein_coding
ENSMUSG00000033769	2595.88	0.182382	0.0832035	2.192	0.0283792	0.290895	Exoc6b	protein_coding
ENSMUSG00000053510	2192.01	0.218276	0.0996319	2.19083	0.0284642	0.291346	Nrdc	protein_coding
ENSMUSG00000033653	849.581	0.255339	0.116613	2.18963	0.0285511	0.291804	Vps8	protein_coding
ENSMUSG00000045624	337.572	0.276647	0.126362	2.18932	0.0285739	0.291804	Esf1	protein_coding
ENSMUSG00000021730	2887.84	-0.323919	0.148152	-2.18639	0.028787	0.293314	Hcn1	protein_coding
ENSMUSG00000018171	2656.3	-0.138948	0.0635418	-2.18672	0.0287632	0.293314	Vmp1	protein_coding
ENSMUSG00000036097	827.981	0.183412	0.083916	2.18566	0.0288407	0.293529	Slf2	protein_coding
ENSMUSG00000033676	4359.03	-0.0933406	0.0427239	-2.18474	0.028908	0.293864	Gabrb3	protein_coding
ENSMUSG00000043467	431.146	0.231332	0.105906	2.18432	0.0289389	0.293864	Zbtb37	protein_coding
ENSMUSG00000097596	598.352	0.195978	0.089913	2.17964	0.0292842	0.293941	Gm26673	lncRNA
ENSMUSG00000102697	662.652	-0.237565	0.108816	-2.18317	0.029023	0.293941	Pcdhac2	protein_coding
ENSMUSG00000047842	3374.49	-0.103393	0.0473968	-2.18143	0.0291516	0.293941	Diras2	protein_coding
ENSMUSG00000029516	3075.76	0.128981	0.0591175	2.18178	0.0291257	0.293941	Cit	protein_coding
ENSMUSG00000055214	529.69	-0.200251	0.0917579	-2.18239	0.0290811	0.293941	Pld5	protein_coding
ENSMUSG00000022807	469.011	-0.17372	0.0795548	-2.18366	0.0289876	0.293941	Osbpl11	protein_coding
ENSMUSG00000051339	590.779	-0.172208	0.0790343	-2.17891	0.0293385	0.293941	2900026A02Rik	protein_coding
ENSMUSG00000046312	884.639	-0.153393	0.0703574	-2.1802	0.0292425	0.293941	Myorg	protein_coding
ENSMUSG00000001445	820.656	-0.135677	0.062213	-2.18084	0.0291949	0.293941	Mrpl10	protein_coding
ENSMUSG00000043154	1569.84	0.192039	0.0880739	2.18044	0.0292252	0.293941	Ppp2r3a	protein_coding
ENSMUSG00000035476	651.591	0.217814	0.0999647	2.17891	0.0293385	0.293941	Tab3	protein_coding
ENSMUSG00000032238	2089.64	0.260904	0.119634	2.18085	0.0291944	0.293941	Rora	protein_coding
ENSMUSG00000044071	577.453	-0.243054	0.111681	-2.17633	0.0295308	0.294683	Tafa2	protein_coding
ENSMUSG00000052419	515.579	-0.211315	0.0971045	-2.17616	0.0295437	0.294683	Smim30	protein_coding
ENSMUSG00000025246	1919.86	-0.154237	0.0708531	-2.17686	0.029491	0.294683	Tbl1x	protein_coding
ENSMUSG00000034973	889.337	0.299693	0.137717	2.17616	0.0295436	0.294683	Dop1a	protein_coding
ENSMUSG00000040549	2677.53	0.267181	0.122805	2.17566	0.0295807	0.294726	Ckap5	protein_coding
ENSMUSG00000032328	14229.4	-0.185097	0.0851566	-2.17361	0.0297345	0.295931	Tmem30a	protein_coding
ENSMUSG00000044835	794.948	-0.153831	0.0708376	-2.17161	0.0298853	0.296462	Ankrd45	protein_coding
ENSMUSG00000057329	796.615	-0.19813	0.0912169	-2.17207	0.0298503	0.296462	Bcl2	protein_coding
ENSMUSG00000006134	2170.23	-0.171543	0.0789943	-2.17159	0.0298868	0.296462	Crkl	protein_coding
ENSMUSG00000021314	4257	-0.173517	0.0799264	-2.17096	0.0299345	0.296609	Amph	protein_coding
ENSMUSG00000054051	378.796	0.196704	0.0906267	2.17049	0.02997	0.296634	Ercc6	protein_coding
ENSMUSG00000027270	5677.76	-0.176686	0.0815359	-2.16697	0.0302369	0.296824	Lamp5	protein_coding
ENSMUSG00000026163	1953.99	0.187462	0.0865296	2.16645	0.0302769	0.296824	Sphkap	protein_coding
ENSMUSG00000042541	1331.91	-0.244613	0.11277	-2.16914	0.0300724	0.296824	Sem1	protein_coding
ENSMUSG00000073987	383.492	-0.201789	0.0932223	-2.1646	0.0304181	0.296824	Ggh	protein_coding
ENSMUSG00000027589	1020.59	-0.158709	0.0732826	-2.16571	0.0303335	0.296824	Pcmtd2	protein_coding
ENSMUSG00000039202	1757.24	-0.153575	0.0709083	-2.16583	0.0303245	0.296824	Abhd2	protein_coding
ENSMUSG00000030286	1480.73	-0.125193	0.0578233	-2.1651	0.0303804	0.296824	Emc3	protein_coding
ENSMUSG00000037519	823.123	0.156048	0.0720877	2.1647	0.030411	0.296824	Ppfia1	protein_coding
ENSMUSG00000022957	4954.31	0.162395	0.0749991	2.16529	0.0303654	0.296824	Itsn1	protein_coding
ENSMUSG00000028048	769.464	0.185669	0.0856838	2.16691	0.0302414	0.296824	Gba1	protein_coding
ENSMUSG00000028530	4080.32	0.201317	0.0928635	2.16788	0.0301679	0.296824	Jak1	protein_coding
ENSMUSG00000030516	2589.81	0.204912	0.0944699	2.16907	0.0300771	0.296824	Tjp1	protein_coding
ENSMUSG00000036693	415.572	0.365609	0.168698	2.16723	0.0302172	0.296824	Nop14	protein_coding
ENSMUSG00000054648	408.208	0.368212	0.170181	2.16365	0.0304912	0.297215	Zfp869	protein_coding
ENSMUSG00000045731	352.738	-0.302292	0.139746	-2.16315	0.0305298	0.297269	Pnoc	protein_coding
ENSMUSG00000017485	1611.68	0.210198	0.0972046	2.16243	0.0305854	0.297489	Top2b	protein_coding
ENSMUSG00000034560	989.494	0.335291	0.155086	2.16196	0.030621	0.297514	Washc4	protein_coding
ENSMUSG00000045589	6317.47	-0.148975	0.0689954	-2.1592	0.0308343	0.297583	Frrs1l	protein_coding
ENSMUSG00000140457	4101.24	-0.335705	0.15558	-2.15777	0.0309459	0.297583	ENSMUSG00000140457	lncRNA
ENSMUSG00000027160	324.552	-0.264181	0.122416	-2.15806	0.0309228	0.297583	Ccdc34	protein_coding
ENSMUSG00000002602	1437.11	-0.155666	0.0721135	-2.15862	0.0308796	0.297583	Axl	protein_coding
ENSMUSG00000024533	3855.07	-0.116818	0.0541424	-2.1576	0.030959	0.297583	Spire1	protein_coding
ENSMUSG00000049553	747.471	0.171823	0.0795463	2.16003	0.0307701	0.297583	Polr1a	protein_coding
ENSMUSG00000027708	593.591	0.196834	0.0912033	2.15819	0.0309131	0.297583	Dcun1d1	protein_coding
ENSMUSG00000019763	352.753	0.226232	0.10484	2.15787	0.0309379	0.297583	Rmnd1	protein_coding
ENSMUSG00000097392	462.811	0.227607	0.105429	2.15888	0.0308598	0.297583	Thoc2l	protein_coding
ENSMUSG00000021595	1328.06	0.237105	0.109838	2.15867	0.0308755	0.297583	Nsun2	protein_coding
ENSMUSG00000050666	381.13	-0.250781	0.11628	-2.15669	0.0310296	0.297944	Vstm4	protein_coding
ENSMUSG00000073295	624.792	-0.1488	0.0690644	-2.15451	0.0312001	0.299036	Nudt11	protein_coding
ENSMUSG00000029427	394.009	0.185348	0.0860664	2.15355	0.0312758	0.299036	Zcchc8	protein_coding
ENSMUSG00000037110	537.272	0.224004	0.104012	2.15362	0.0312697	0.299036	Ralgapa2	protein_coding
ENSMUSG00000030180	873.271	0.24043	0.111644	2.15354	0.0312763	0.299036	Kdm5a	protein_coding
ENSMUSG00000034780	969.731	0.203024	0.0943208	2.15248	0.0313594	0.299512	B3galt1	protein_coding
ENSMUSG00000035847	13095.2	-0.146628	0.0681694	-2.15093	0.0314818	0.299955	Ids	protein_coding
ENSMUSG00000061315	2260.69	0.216133	0.100483	2.15095	0.0314802	0.299955	Naca	protein_coding
ENSMUSG00000051527	1715.66	0.325971	0.15157	2.15063	0.0315058	0.299955	Usp29	protein_coding
ENSMUSG00000024576	5982.97	-0.167091	0.0777816	-2.14821	0.0316969	0.301455	Csnk1a1	protein_coding
ENSMUSG00000001783	2279.24	-0.125228	0.058352	-2.14608	0.0318666	0.30243	Rtcb	protein_coding
ENSMUSG00000036550	1571.67	0.291763	0.135932	2.14639	0.0318418	0.30243	Cnot1	protein_coding
ENSMUSG00000035868	542.402	-0.197149	0.0919732	-2.14355	0.0320693	0.304033	Zfp983	protein_coding
ENSMUSG00000036104	2064.94	-0.103729	0.0484265	-2.14198	0.0321947	0.304901	Rab3gap1	protein_coding
ENSMUSG00000028973	430.148	-0.201292	0.0940367	-2.14057	0.0323087	0.305092	Abcb8	protein_coding
ENSMUSG00000027221	1101.6	-0.145446	0.0679505	-2.14047	0.0323166	0.305092	Chst1	protein_coding
ENSMUSG00000037400	1697.49	0.123179	0.0575445	2.14059	0.032307	0.305092	Atp11b	protein_coding
ENSMUSG00000046093	2289.65	-0.234451	0.109845	-2.13439	0.0328108	0.305272	Hpcal4	protein_coding
ENSMUSG00000020659	644.597	-0.204149	0.0954663	-2.13844	0.0324814	0.305272	Cbll1	protein_coding
ENSMUSG00000030663	901.257	-0.186922	0.0875605	-2.13478	0.0327789	0.305272	1110004F10Rik	protein_coding
ENSMUSG00000064373	15583.5	-0.165273	0.0772669	-2.13899	0.0324364	0.305272	Selenop	protein_coding
ENSMUSG00000078578	4491.77	-0.154924	0.0724117	-2.13949	0.032396	0.305272	Ube2d3	protein_coding
ENSMUSG00000066735	1951.7	-0.134899	0.0631253	-2.13701	0.0325975	0.305272	Vkorc1l1	protein_coding
ENSMUSG00000037242	5877.72	-0.103977	0.048659	-2.13685	0.0326099	0.305272	Clic4	protein_coding
ENSMUSG00000059890	2299.7	0.115689	0.0542022	2.1344	0.0328102	0.305272	Ube4a	protein_coding
ENSMUSG00000005610	15551.7	0.116699	0.0546647	2.13482	0.0327757	0.305272	Eif4g2	protein_coding
ENSMUSG00000005442	2252.52	0.134619	0.0630613	2.13474	0.0327826	0.305272	Cic	protein_coding
ENSMUSG00000022443	1176.13	0.18794	0.0880152	2.13531	0.0327357	0.305272	Myh9	protein_coding
ENSMUSG00000048347	292.338	0.236244	0.110465	2.13864	0.032465	0.305272	Pcdhb18	protein_coding
ENSMUSG00000059423	271.641	0.281423	0.1317	2.13685	0.0326105	0.305272	Zfp933	protein_coding
ENSMUSG00000079470	620.365	0.281867	0.131918	2.13668	0.0326238	0.305272	Utp14b	protein_coding
ENSMUSG00000057614	4260.27	-0.174836	0.0819358	-2.13382	0.0328579	0.305395	Gnai1	protein_coding
ENSMUSG00000029819	505.762	-0.236644	0.110939	-2.13311	0.032916	0.305405	Npy	protein_coding
ENSMUSG00000078716	828.434	-0.155202	0.0727631	-2.13297	0.0329268	0.305405	Tmem8b	protein_coding
ENSMUSG00000024594	318.679	-0.202166	0.094829	-2.1319	0.0330152	0.30544	Prrc1	protein_coding
ENSMUSG00000031885	779.264	-0.194583	0.0912595	-2.1322	0.0329907	0.30544	Cbfb	protein_coding
ENSMUSG00000028081	1975.43	0.284344	0.133389	2.13169	0.0330324	0.30544	Rps3a1	protein_coding
ENSMUSG00000051674	3184	0.149677	0.0702741	2.1299	0.0331801	0.30649	Dcun1d4	protein_coding
ENSMUSG00000019831	1480.86	-0.245519	0.115364	-2.1282	0.0333204	0.307398	Wasf1	protein_coding
ENSMUSG00000022661	1903.08	-0.176588	0.0829881	-2.12787	0.0333481	0.307398	Cd200	protein_coding
ENSMUSG00000029050	1897.33	-0.128608	0.0604513	-2.12747	0.0333808	0.307398	Ski	protein_coding
ENSMUSG00000036046	3808.58	-0.140336	0.0660446	-2.12487	0.0335976	0.308762	5031439G07Rik	protein_coding
ENSMUSG00000070047	2728.91	0.108571	0.0510897	2.12511	0.0335772	0.308762	Fat1	protein_coding
ENSMUSG00000034152	2082.9	0.152122	0.0716167	2.12411	0.0336613	0.309031	Exoc3	protein_coding
ENSMUSG00000038914	1063.25	0.136355	0.0642103	2.12357	0.0337062	0.309128	Dido1	protein_coding
ENSMUSG00000033174	893.383	-0.147896	0.0696744	-2.12267	0.0337817	0.309505	Mgll	protein_coding
ENSMUSG00000019789	316.905	-0.236724	0.111601	-2.12116	0.0339084	0.31035	Hey2	protein_coding
ENSMUSG00000041923	612.207	-0.146982	0.0694076	-2.11767	0.0342031	0.310532	Nol4	protein_coding
ENSMUSG00000034042	704.422	-0.176574	0.0833711	-2.11793	0.0341813	0.310532	Gpbp1l1	protein_coding
ENSMUSG00000008892	1226.11	-0.139093	0.0656824	-2.11765	0.0342044	0.310532	Vdac3	protein_coding
ENSMUSG00000005312	5885.06	-0.129237	0.060991	-2.11896	0.0340941	0.310532	Ubqln1	protein_coding
ENSMUSG00000025579	6116.1	-0.101213	0.0477462	-2.11982	0.034021	0.310532	Gaa	protein_coding
ENSMUSG00000071659	2825.49	0.122265	0.0577164	2.11838	0.0341428	0.310532	Hnrnpul2	protein_coding
ENSMUSG00000000194	926.421	0.138838	0.0655198	2.11902	0.0340885	0.310532	Gpr107	protein_coding
ENSMUSG00000039205	584.656	0.154066	0.0726946	2.11936	0.0340599	0.310532	Ciz1	protein_coding
ENSMUSG00000000355	877.954	-0.221099	0.104429	-2.11722	0.0342415	0.310555	Mcts1	protein_coding
ENSMUSG00000031785	2342.11	-0.125484	0.0593119	-2.11566	0.0343739	0.311442	Adgrg1	protein_coding
ENSMUSG00000050912	763.701	-0.186831	0.0884003	-2.11346	0.0345612	0.311892	Tmem123	protein_coding
ENSMUSG00000034165	341.361	-0.186659	0.0883121	-2.11362	0.0345475	0.311892	Ccnd3	protein_coding
ENSMUSG00000005683	6372.53	-0.17117	0.0809623	-2.11419	0.0344989	0.311892	Cs	protein_coding
ENSMUSG00000028710	1030.19	0.175496	0.0830374	2.11345	0.0345622	0.311892	Atpaf1	protein_coding
ENSMUSG00000044499	504.83	-0.267422	0.126724	-2.11027	0.0348352	0.31404	Hs3st5	protein_coding
ENSMUSG00000040451	1360.41	-0.11816	0.0560104	-2.10961	0.0348918	0.314236	Sgms1	protein_coding
ENSMUSG00000004789	2688.04	-0.112734	0.0534513	-2.1091	0.0349356	0.314316	Dlst	protein_coding	mitochondrion
ENSMUSG00000029474	970.369	-0.1504	0.0713876	-2.10681	0.0351338	0.315783	Rnf34	protein_coding
ENSMUSG00000033717	793.865	-0.176903	0.0840397	-2.105	0.0352914	0.316484	Adra2a	protein_coding
ENSMUSG00000028426	3224.6	-0.205463	0.0977632	-2.10164	0.035585	0.316484	Rad23b	protein_coding
ENSMUSG00000020585	5940.51	-0.173799	0.0826908	-2.10179	0.0355717	0.316484	Laptm4a	protein_coding
ENSMUSG00000021846	1287.69	-0.125938	0.0599106	-2.1021	0.0355445	0.316484	Peli2	protein_coding
ENSMUSG00000053985	385.375	0.174436	0.083006	2.10148	0.0355988	0.316484	Zfp14	protein_coding
ENSMUSG00000025241	1054.46	0.196965	0.093646	2.1033	0.0354397	0.316484	Fyco1	protein_coding
ENSMUSG00000036435	827.053	0.197582	0.0938745	2.10474	0.0353138	0.316484	Exoc1	protein_coding
ENSMUSG00000030554	1729.47	0.213555	0.101532	2.10333	0.0354368	0.316484	Synm	protein_coding
ENSMUSG00000015757	396.575	0.26078	0.124043	2.10234	0.0355236	0.316484	Ppil4	protein_coding
ENSMUSG00000024974	634.844	0.316447	0.150543	2.10204	0.0355498	0.316484	Smc3	protein_coding
ENSMUSG00000043411	1688.05	0.331334	0.157657	2.10161	0.0355875	0.316484	Usp48	protein_coding
ENSMUSG00000026615	1739.38	0.335788	0.159894	2.10007	0.0357229	0.317275	Eprs1	protein_coding
ENSMUSG00000038708	1269.02	0.493528	0.235071	2.09949	0.0357737	0.317412	Golga4	protein_coding
ENSMUSG00000032741	1023.4	-0.125758	0.0599241	-2.09862	0.0358507	0.317782	Tpcn1	protein_coding
ENSMUSG00000079037	11838.7	-0.110928	0.0528712	-2.09809	0.0358975	0.317884	Prnp	protein_coding
ENSMUSG00000068220	560.242	0.276285	0.131711	2.09766	0.0359348	0.317901	Lgals1	protein_coding
ENSMUSG00000057230	9243.99	0.11856	0.0565752	2.09562	0.0361158	0.317952	Aak1	protein_coding
ENSMUSG00000033964	897.691	0.144718	0.0690512	2.0958	0.0360999	0.317952	Zbtb41	protein_coding
ENSMUSG00000042156	3042.55	0.14822	0.0707258	2.0957	0.0361087	0.317952	Dzip1	protein_coding
ENSMUSG00000029178	884.464	0.169591	0.0809271	2.0956	0.0361173	0.317952	Klf3	protein_coding
ENSMUSG00000015605	267.887	0.246199	0.117451	2.09619	0.0360655	0.317952	Srf	protein_coding
ENSMUSG00000039428	1611.7	-0.146161	0.069804	-2.09389	0.0362702	0.318986	Tmem135	protein_coding
ENSMUSG00000031010	4122.39	0.204119	0.0975102	2.09331	0.0363214	0.319125	Usp9x	protein_coding
ENSMUSG00000040666	376.291	0.209697	0.100202	2.09273	0.036373	0.319266	Sh3bgr	protein_coding
ENSMUSG00000026915	2175.92	0.128077	0.0612358	2.09154	0.0364794	0.319888	Strbp	protein_coding
ENSMUSG00000028550	1044.2	-0.14792	0.0707541	-2.09062	0.0365626	0.319932	Atg4c	protein_coding
ENSMUSG00000028639	1406.17	-0.130962	0.0626521	-2.0903	0.0365911	0.319932	Ybx1	protein_coding
ENSMUSG00000110185	2385.4	0.164016	0.0784381	2.09102	0.0365262	0.319932	Igip	protein_coding
ENSMUSG00000042444	2661.71	-0.164059	0.0786465	-2.08602	0.0369764	0.321214	Mindy2	protein_coding
ENSMUSG00000052139	686.636	-0.209275	0.10051	-2.08213	0.0373305	0.321214	Babam2	protein_coding
ENSMUSG00000001755	371.273	-0.207399	0.0995735	-2.08287	0.0372631	0.321214	Coasy	protein_coding
ENSMUSG00000052656	1299.39	-0.20139	0.0967484	-2.08159	0.0373804	0.321214	Rnf103	protein_coding
ENSMUSG00000047454	1886.23	-0.193305	0.0926263	-2.08694	0.0368939	0.321214	Gphn	protein_coding
ENSMUSG00000029462	2300.78	-0.132296	0.0635552	-2.0816	0.037379	0.321214	Vps29	protein_coding
ENSMUSG00000018401	1953.61	0.119174	0.0572474	2.08173	0.037367	0.321214	Mtmr4	protein_coding
ENSMUSG00000040760	2230.1	0.128106	0.0614888	2.0834	0.0372146	0.321214	Appl1	protein_coding
ENSMUSG00000023960	7178.65	0.130253	0.0624401	2.08605	0.036974	0.321214	Enpp5	protein_coding
ENSMUSG00000025047	456.754	0.170664	0.081957	2.08236	0.0373095	0.321214	Pdcd11	protein_coding
ENSMUSG00000019977	535.39	0.172692	0.0829464	2.08197	0.0373451	0.321214	Hbs1l	protein_coding
ENSMUSG00000030400	335.712	0.187569	0.0900372	2.08323	0.0372299	0.321214	Ercc2	protein_coding
ENSMUSG00000039607	2223.71	0.199572	0.0957218	2.08491	0.0370773	0.321214	Rbms3	protein_coding
ENSMUSG00000034021	2092	0.207066	0.0994337	2.08245	0.0373015	0.321214	Pds5b	protein_coding
ENSMUSG00000027998	503.988	0.242942	0.116572	2.08405	0.0371559	0.321214	Plrg1	protein_coding
ENSMUSG00000059475	533.911	0.246108	0.117961	2.08635	0.0369473	0.321214	Zfp426	protein_coding
ENSMUSG00000021500	1018.06	0.262572	0.125865	2.08614	0.0369659	0.321214	Ddx46	protein_coding
ENSMUSG00000037531	305.576	0.30821	0.148059	2.08167	0.0373725	0.321214	Mrpl47	protein_coding
ENSMUSG00000031617	2625.86	0.188014	0.0903398	2.08118	0.037417	0.321222	Tmem184c	protein_coding
ENSMUSG00000089862	443.584	-0.199077	0.0957058	-2.0801	0.0375167	0.321771	Umad1	protein_coding
ENSMUSG00000049421	758.76	0.253091	0.121734	2.07906	0.0376119	0.322281	Zfp260	protein_coding
ENSMUSG00000078622	2093.15	0.220462	0.106076	2.07834	0.0376779	0.322538	Ccdc47	protein_coding
ENSMUSG00000075318	1575.29	0.242236	0.116596	2.07757	0.0377489	0.322839	Scn2a	protein_coding
ENSMUSG00000020115	791.291	0.243553	0.117257	2.07708	0.0377943	0.32292	Tbk1	protein_coding
ENSMUSG00000032827	2769.69	0.198956	0.0958531	2.07564	0.0379273	0.323442	Ppp1r9a	protein_coding
ENSMUSG00000021188	1210.54	0.278458	0.134154	2.07566	0.0379258	0.323442	Trip11	protein_coding
ENSMUSG00000047507	1141.51	-0.155044	0.0747662	-2.07371	0.038106	0.324658	Baiap3	protein_coding
ENSMUSG00000058070	2563.62	0.253398	0.12225	2.07279	0.038192	0.325084	Eml1	protein_coding
ENSMUSG00000038014	2449.53	-0.129037	0.0623071	-2.07099	0.0383597	0.325894	Fam120a	protein_coding
ENSMUSG00000037971	643.786	0.207977	0.100422	2.07103	0.0383556	0.325894	Cfap68	protein_coding
ENSMUSG00000027822	922.007	-0.198297	0.0957773	-2.0704	0.0384149	0.326055	Slc33a1	protein_coding
ENSMUSG00000051469	925.014	0.200236	0.0967386	2.06986	0.0384653	0.326175	Zfp24	protein_coding
ENSMUSG00000046613	584.228	0.240672	0.116313	2.06918	0.0385293	0.326411	Vwa5b2	protein_coding
ENSMUSG00000028156	1230.03	0.111024	0.0536773	2.06836	0.0386066	0.326758	Eif4e	protein_coding
ENSMUSG00000085067	287.218	0.216129	0.104597	2.0663	0.0388003	0.327544	Gm15631	lncRNA
ENSMUSG00000040018	554.223	-0.176825	0.0855844	-2.06608	0.0388205	0.327544	Cox15	protein_coding
ENSMUSG00000035086	1281.88	0.158396	0.0766747	2.06582	0.0388452	0.327544	Becn1	protein_coding
ENSMUSG00000037640	466.417	0.312401	0.151182	2.06639	0.0387915	0.327544	Zfp60	protein_coding
ENSMUSG00000019818	2939.91	-0.0893495	0.0432682	-2.06502	0.0389214	0.327685	Cd164	protein_coding
ENSMUSG00000010608	1686.17	0.124319	0.0602063	2.06488	0.0389347	0.327685	Rbm25	protein_coding
ENSMUSG00000031644	490.046	0.190876	0.0924759	2.06406	0.039012	0.328017	Nek1	protein_coding
ENSMUSG00000028514	1278.91	0.195138	0.0945578	2.06369	0.039047	0.328017	Usp24	protein_coding
ENSMUSG00000038462	2732.23	-0.169966	0.0824232	-2.06211	0.039197	0.328466	Uqcrfs1	protein_coding	mitochondrion
ENSMUSG00000021133	927.82	-0.216372	0.104929	-2.06209	0.0391988	0.328466	Susd6	protein_coding
ENSMUSG00000021537	1041.31	-0.151373	0.0734118	-2.06198	0.03921	0.328466	Cetn3	protein_coding
ENSMUSG00000030512	268.696	0.243736	0.118343	2.05957	0.0394395	0.330081	Snrpa1	protein_coding
ENSMUSG00000049119	457.515	-0.252239	0.122511	-2.0589	0.0395035	0.330101	Fam110b	protein_coding
ENSMUSG00000030788	2055.9	0.181885	0.088346	2.05878	0.0395153	0.330101	Rnf141	protein_coding
ENSMUSG00000026696	2292.33	-0.111193	0.054036	-2.05776	0.0396128	0.330609	Vamp4	protein_coding
ENSMUSG00000030235	766.796	-0.213389	0.103734	-2.05707	0.0396798	0.330861	Slco1c1	protein_coding
ENSMUSG00000037526	363.021	-0.189341	0.0920629	-2.05665	0.0397196	0.330886	Atg14	protein_coding
ENSMUSG00000072966	3410.54	0.217273	0.105687	2.05583	0.0397993	0.331084	Gprasp2	protein_coding
ENSMUSG00000053286	552.613	-0.215711	0.104936	-2.05564	0.039817	0.331084	Trmt1l	protein_coding
ENSMUSG00000056222	8923.67	-0.137188	0.066773	-2.05455	0.0399226	0.33124	Spock1	protein_coding
ENSMUSG00000030737	348.62	-0.233075	0.113431	-2.05477	0.0399013	0.33124	Slco2b1	protein_coding
ENSMUSG00000041762	1399.79	-0.137565	0.0669641	-2.05431	0.0399461	0.33124	Gpr155	protein_coding
ENSMUSG00000049191	652.914	-0.137427	0.0669554	-2.05251	0.0401201	0.332071	Rtl5	protein_coding
ENSMUSG00000026074	2792.45	0.183912	0.0895918	2.05278	0.0400936	0.332071	Map4k4	protein_coding
ENSMUSG00000024054	639.683	0.301987	0.147165	2.05203	0.0401665	0.332149	Smchd1	protein_coding
ENSMUSG00000104597	405.703	0.255076	0.124397	2.0505	0.0403154	0.332441	Lrrc7	lncRNA
ENSMUSG00000031302	796.785	-0.164018	0.0800081	-2.05002	0.0403626	0.332441	Nlgn3	protein_coding
ENSMUSG00000086324	852.158	-0.270565	0.132022	-2.04939	0.0404236	0.332441	Gm15564	lncRNA
ENSMUSG00000002006	884.13	-0.16542	0.080689	-2.05009	0.0403552	0.332441	Pdzd4	protein_coding
ENSMUSG00000041264	520.934	0.195603	0.0954366	2.04956	0.0404075	0.332441	Uspl1	protein_coding
ENSMUSG00000024290	821.488	0.221799	0.108171	2.05045	0.0403202	0.332441	Rock1	protein_coding
ENSMUSG00000062949	796.062	0.155587	0.0759514	2.04851	0.0405103	0.332546	Atp11c	protein_coding
ENSMUSG00000035575	749.89	0.233599	0.114031	2.04856	0.0405049	0.332546	Utp6	protein_coding
ENSMUSG00000043252	1223.59	-0.194495	0.0949857	-2.04763	0.0405967	0.332952	Tmem64	protein_coding
ENSMUSG00000035212	396.125	-0.207032	0.101185	-2.04606	0.0407501	0.333346	Leprot	protein_coding
ENSMUSG00000047187	4718.07	-0.0973777	0.0475941	-2.046	0.0407559	0.333346	Rab2a	protein_coding
ENSMUSG00000047459	2849.77	0.139479	0.0681523	2.04657	0.0407	0.333346	Dynlrb1	protein_coding
ENSMUSG00000032012	944.882	-0.145183	0.0710191	-2.04428	0.0409262	0.334435	Nectin1	protein_coding
ENSMUSG00000024843	906.59	0.158685	0.0776452	2.04372	0.0409817	0.334584	Chka	protein_coding
ENSMUSG00000028222	1069.12	-0.187987	0.0920535	-2.04214	0.0411372	0.334809	Calb1	protein_coding
ENSMUSG00000024487	778.271	-0.158994	0.0778975	-2.04107	0.0412438	0.334809	Yipf5	protein_coding
ENSMUSG00000000711	1542.34	-0.150075	0.0734864	-2.04221	0.0411308	0.334809	Rab5b	protein_coding
ENSMUSG00000018501	2568.85	0.129414	0.0633796	2.04188	0.0411635	0.334809	Ncor1	protein_coding
ENSMUSG00000042133	1453.64	0.13338	0.0652846	2.04306	0.0410466	0.334809	Ppig	protein_coding
ENSMUSG00000027993	9455.84	0.156024	0.076452	2.04081	0.0412697	0.334809	Trim2	protein_coding
ENSMUSG00000069049	641.505	0.263577	0.129134	2.0411	0.0412406	0.334809	Eif2s3y	protein_coding
ENSMUSG00000048249	1588.02	0.202769	0.0993902	2.04013	0.0413376	0.335058	Crebrf	protein_coding
ENSMUSG00000036478	341.708	-0.265637	0.130316	-2.0384	0.0415099	0.335241	Btg1	protein_coding
ENSMUSG00000066798	381.992	-0.22397	0.109945	-2.03711	0.0416387	0.335241	Zbtb6	protein_coding
ENSMUSG00000025037	1014.3	-0.147332	0.0723003	-2.03778	0.0415715	0.335241	Maoa	protein_coding
ENSMUSG00000026782	3925.42	-0.138406	0.0679403	-2.03717	0.041633	0.335241	Abi2	protein_coding
ENSMUSG00000061313	1324.31	0.141831	0.0696404	2.03663	0.0416876	0.335241	Ddhd2	protein_coding
ENSMUSG00000090112	970.382	0.16744	0.0822171	2.03656	0.0416944	0.335241	Shprh	protein_coding
ENSMUSG00000034109	1094.45	0.208638	0.102392	2.03763	0.0415867	0.335241	Golim4	protein_coding
ENSMUSG00000021376	394.171	0.213147	0.104641	2.03694	0.041656	0.335241	Tpmt	protein_coding
ENSMUSG00000037999	1162.25	0.231627	0.113735	2.03655	0.0416955	0.335241	Arap2	protein_coding
ENSMUSG00000032897	306.881	-0.216405	0.106315	-2.0355	0.0418005	0.335485	Nfyc	protein_coding
ENSMUSG00000052889	2875.35	0.15911	0.0781618	2.03565	0.0417852	0.335485	Prkcb	protein_coding
ENSMUSG00000041660	503.108	-0.314393	0.154652	-2.03291	0.0420619	0.335509	Bbox1	protein_coding
ENSMUSG00000034216	689.236	-0.158818	0.0781244	-2.03288	0.0420645	0.335509	Vps18	protein_coding
ENSMUSG00000027405	974.063	0.15636	0.0768934	2.03347	0.0420055	0.335509	Nop56	protein_coding
ENSMUSG00000079555	286.208	0.245733	0.120859	2.03321	0.0420309	0.335509	Haus3	protein_coding
ENSMUSG00000046185	302.753	0.266378	0.131033	2.0329	0.0420622	0.335509	Zfp84	protein_coding
ENSMUSG00000032560	884.218	0.319421	0.157032	2.03411	0.0419404	0.335509	Dnajc13	protein_coding
ENSMUSG00000038608	1173.41	0.326768	0.160676	2.03371	0.041981	0.335509	Dock10	protein_coding
ENSMUSG00000052299	1025.68	0.247142	0.121613	2.0322	0.0421333	0.33576	Ltn1	protein_coding
ENSMUSG00000029152	6645.53	-0.198986	0.0980329	-2.02978	0.0423784	0.337318	Ociad1	protein_coding
ENSMUSG00000028234	2806.99	-0.1487	0.0733139	-2.02826	0.0425337	0.337318	Rps20	protein_coding
ENSMUSG00000053768	1368.36	-0.128447	0.0633293	-2.02824	0.0425362	0.337318	Chchd3	protein_coding
ENSMUSG00000050697	2597.19	-0.113798	0.0561173	-2.02786	0.0425744	0.337318	Prkaa1	protein_coding
ENSMUSG00000025958	1176.47	0.136012	0.0670369	2.02891	0.0424677	0.337318	Creb1	protein_coding
ENSMUSG00000068036	1411.71	0.159695	0.0787566	2.0277	0.0425913	0.337318	Afdn	protein_coding
ENSMUSG00000020608	798.317	0.240993	0.118807	2.02844	0.0425153	0.337318	Smc6	protein_coding
ENSMUSG00000046603	569.914	-0.20213	0.0997858	-2.02564	0.0428013	0.337497	Tcaim	protein_coding	mitochondrion
ENSMUSG00000057098	2266.32	-0.167805	0.0828148	-2.02627	0.0427372	0.337497	Ebf1	protein_coding
ENSMUSG00000060681	3258.21	-0.11119	0.0548735	-2.0263	0.0427339	0.337497	Slc9a6	protein_coding
ENSMUSG00000040389	1978.85	0.139058	0.0686403	2.02589	0.0427757	0.337497	Wdr47	protein_coding
ENSMUSG00000040720	749.668	0.147835	0.072948	2.02658	0.0427059	0.337497	Virma	protein_coding
ENSMUSG00000052125	437.182	0.237683	0.117452	2.02366	0.0430051	0.33851	F730043M19Rik	lncRNA
ENSMUSG00000040640	833.244	0.174387	0.0861704	2.02375	0.0429958	0.33851	Erc2	protein_coding
ENSMUSG00000025582	4297.5	-0.12643	0.0625319	-2.02185	0.0431921	0.338998	Nptx1	protein_coding
ENSMUSG00000024900	1097.75	0.122163	0.0604163	2.02202	0.0431745	0.338998	Cpt1a	protein_coding
ENSMUSG00000040648	1452.19	0.175725	0.0868982	2.02219	0.0431565	0.338998	Ppip5k2	protein_coding
ENSMUSG00000021112	1508.41	0.247278	0.122318	2.0216	0.0432178	0.338998	Pals1	protein_coding
ENSMUSG00000053963	978.517	-0.219533	0.108677	-2.02006	0.0433775	0.339363	Stum	protein_coding
ENSMUSG00000109865	327.202	0.189903	0.0939767	2.02075	0.0433061	0.339363	Hspa14	protein_coding
ENSMUSG00000031954	781.331	0.329848	0.163266	2.02031	0.0433516	0.339363	Cfdp1	protein_coding
ENSMUSG00000030704	14044.3	-0.213454	0.105732	-2.01882	0.0435056	0.33948	Rab6a	protein_coding
ENSMUSG00000016382	2382.94	0.194227	0.0962047	2.01889	0.0434986	0.33948	Pls3	protein_coding
ENSMUSG00000022672	374.231	0.244434	0.121063	2.01907	0.0434796	0.33948	Prkdc	protein_coding
ENSMUSG00000037742	9394.48	0.221993	0.110063	2.01695	0.0437003	0.340408	Eef1a1	protein_coding
ENSMUSG00000000794	518.885	0.284273	0.140925	2.01719	0.0436758	0.340408	Kcnn3	protein_coding
ENSMUSG00000031483	1235.66	-0.1298	0.0644031	-2.01544	0.043859	0.341054	Erlin2	protein_coding
ENSMUSG00000029701	799.62	0.18302	0.0908023	2.01559	0.0438426	0.341054	Rbm28	protein_coding
ENSMUSG00000044986	456.124	-0.184256	0.0914607	-2.01459	0.0439471	0.341355	Tst	protein_coding
ENSMUSG00000032437	2385.2	-0.0923499	0.0458462	-2.01434	0.0439736	0.341355	Stt3b	protein_coding
ENSMUSG00000041141	1661.03	-0.130003	0.0645845	-2.01291	0.0441242	0.341934	Pnma8a	protein_coding
ENSMUSG00000052387	3458.51	0.181951	0.0903813	2.01314	0.0440994	0.341934	Trpm3	protein_coding
ENSMUSG00000027879	1272.89	-0.152486	0.0758183	-2.0112	0.0443042	0.343034	Sec22b	protein_coding
ENSMUSG00000030201	1110.43	0.211456	0.105175	2.01052	0.0443764	0.343297	Lrp6	protein_coding
ENSMUSG00000010517	1055.38	-0.152053	0.0756975	-2.00869	0.04457	0.344148	Faf1	protein_coding
ENSMUSG00000022307	3995.12	0.117434	0.0584701	2.00844	0.0445963	0.344148	Oxr1	protein_coding
ENSMUSG00000042590	1059.08	0.135507	0.0674714	2.00836	0.0446055	0.344148	Ipo11	protein_coding
ENSMUSG00000058558	855.949	0.310043	0.154401	2.00804	0.0446394	0.344148	Rpl5	protein_coding
ENSMUSG00000039449	764.309	0.172691	0.0860475	2.00693	0.0447572	0.344171	Prpf18	protein_coding
ENSMUSG00000008206	732.153	0.181987	0.0906721	2.00709	0.0447399	0.344171	Cers4	protein_coding
ENSMUSG00000041236	2742.84	0.26674	0.132876	2.00743	0.0447039	0.344171	Vps41	protein_coding
ENSMUSG00000026103	4056.31	-0.179243	0.0893799	-2.0054	0.04492	0.344783	Gls	protein_coding	mitochondrion
ENSMUSG00000057455	3581.89	-0.174439	0.0870474	-2.00395	0.0450752	0.344783	Rit2	protein_coding
ENSMUSG00000049252	867.476	0.180652	0.0901302	2.00435	0.0450329	0.344783	Lrp1b	protein_coding
ENSMUSG00000027835	537.568	-0.21684	0.108281	-2.00258	0.0452224	0.344783	Pdcd10	protein_coding
ENSMUSG00000026869	1592.18	-0.120639	0.0601515	-2.00559	0.0448999	0.344783	Psmd5	protein_coding
ENSMUSG00000019124	4588.37	0.112698	0.056286	2.00225	0.0452583	0.344783	Scrn1	protein_coding
ENSMUSG00000027363	2666.41	0.1434	0.0715504	2.00419	0.0450502	0.344783	Usp8	protein_coding
ENSMUSG00000032301	807.188	0.207609	0.103685	2.0023	0.0452528	0.344783	Psma4	protein_coding
ENSMUSG00000023932	514.924	0.242437	0.12093	2.00477	0.0449875	0.344783	Cdc5l	protein_coding
ENSMUSG00000021192	439.098	0.245981	0.122773	2.00355	0.0451184	0.344783	Golga5	protein_coding
ENSMUSG00000005370	381.626	0.312988	0.156318	2.00225	0.0452576	0.344783	Msh6	protein_coding
ENSMUSG00000074170	264.25	-0.244005	0.121931	-2.00117	0.0453742	0.345082	Plekhf1	protein_coding
ENSMUSG00000018446	1298.03	0.12912	0.0645118	2.0015	0.0453387	0.345082	C1qbp	protein_coding
ENSMUSG00000028273	932.676	-0.228716	0.114366	-1.99986	0.0455149	0.345664	Pdlim5	protein_coding
ENSMUSG00000021036	987.998	0.14355	0.0717841	1.99975	0.0455276	0.345664	Sptlc2	protein_coding
ENSMUSG00000035051	799.237	0.152759	0.0764367	1.99851	0.0456617	0.34639	Dhx57	protein_coding
ENSMUSG00000020638	684.57	0.157744	0.0789478	1.99808	0.0457081	0.34645	Cmpk2	protein_coding
ENSMUSG00000033790	864.759	0.190053	0.0951473	1.99746	0.0457757	0.34667	Tubgcp5	protein_coding
ENSMUSG00000025889	882.086	-0.247716	0.12408	-1.99642	0.0458882	0.34723	Snca	protein_coding
ENSMUSG00000026568	1648.18	-0.206636	0.103538	-1.99576	0.04596	0.347481	Mpc2	protein_coding	mitochondrion
ENSMUSG00000052707	1776.63	0.202113	0.101291	1.99537	0.0460031	0.347514	Tnrc6a	protein_coding
ENSMUSG00000016409	465.175	-0.171777	0.0861185	-1.99466	0.0460803	0.347806	Nkap	protein_coding
ENSMUSG00000026110	890.699	0.19292	0.0967566	1.99387	0.0461659	0.34816	Mgat4a	protein_coding
ENSMUSG00000054469	643.834	-0.137012	0.0687385	-1.99324	0.0462352	0.34839	Lclat1	protein_coding
ENSMUSG00000034247	426.442	-0.187048	0.0938987	-1.99202	0.0463686	0.349103	Plekhm1	protein_coding
ENSMUSG00000001891	2355.89	-0.11716	0.0589161	-1.98859	0.046746	0.349765	Ugp2	protein_coding
ENSMUSG00000034998	437.232	-0.210494	0.105825	-1.98908	0.0466923	0.349765	Foxn2	protein_coding
ENSMUSG00000045414	874.939	-0.205578	0.103407	-1.98805	0.0468064	0.349765	Dipk2a	protein_coding
ENSMUSG00000020671	6096.29	-0.163091	0.0819281	-1.99067	0.0465177	0.349765	Rab10	protein_coding
ENSMUSG00000034707	2424.73	-0.0968772	0.0486981	-1.98934	0.0466632	0.349765	Gns	protein_coding
ENSMUSG00000032549	14726.6	-0.0793691	0.0398801	-1.99019	0.0465695	0.349765	Rab6b	protein_coding
ENSMUSG00000044864	1927.05	0.131316	0.0660467	1.98822	0.0467873	0.349765	Ankrd50	protein_coding
ENSMUSG00000028559	1178.45	0.23003	0.1157	1.98815	0.0467948	0.349765	Osbpl9	protein_coding
ENSMUSG00000017417	417.955	0.230169	0.115738	1.98871	0.0467334	0.349765	Plxdc1	protein_coding
ENSMUSG00000019889	880.267	-0.180115	0.0906156	-1.98768	0.0468473	0.34978	Ptprk	protein_coding
ENSMUSG00000020464	487.075	0.169639	0.0854334	1.98563	0.0470749	0.351188	Pnpt1	protein_coding
ENSMUSG00000032051	287.194	-0.223731	0.112757	-1.98419	0.0472352	0.352092	Fdx1	protein_coding
ENSMUSG00000048004	697.622	-0.163849	0.0826562	-1.9823	0.0474461	0.352462	Tmem196	protein_coding
ENSMUSG00000027957	581.317	-0.180064	0.0908275	-1.98248	0.0474256	0.352462	Slc35a3	protein_coding
ENSMUSG00000039662	1014.62	-0.136114	0.0686878	-1.98164	0.0475198	0.352462	Icmt	protein_coding
ENSMUSG00000031878	746.297	0.170465	0.0860036	1.98206	0.0474721	0.352462	Nae1	protein_coding
ENSMUSG00000057101	781.89	0.172949	0.0872482	1.98227	0.0474494	0.352462	Zfp180	protein_coding
ENSMUSG00000110444	286.679	0.243804	0.123017	1.98187	0.0474943	0.352462	Gm10033	protein_coding
ENSMUSG00000050830	373.137	-0.204923	0.103479	-1.98034	0.0476656	0.353225	Vwc2	protein_coding
ENSMUSG00000039239	541.583	-0.22345	0.11287	-1.97971	0.0477364	0.353225	Tgfb2	protein_coding
ENSMUSG00000024091	3489.8	-0.185649	0.093778	-1.97967	0.0477405	0.353225	Vapa	protein_coding
ENSMUSG00000028165	1207.39	-0.125991	0.0636868	-1.97829	0.0478963	0.354086	Cisd2	protein_coding
ENSMUSG00000024112	422.24	-0.200184	0.101224	-1.97762	0.0479712	0.354349	Cacna1h	protein_coding
ENSMUSG00000032637	1683.66	0.114991	0.0581791	1.9765	0.0480978	0.354993	Atxn2l	protein_coding
ENSMUSG00000040123	473.455	0.231427	0.117115	1.97607	0.0481463	0.355059	Zmym5	protein_coding
ENSMUSG00000048482	264.504	-0.297891	0.150815	-1.97521	0.0482441	0.355103	Bdnf	protein_coding
ENSMUSG00000022292	1024.77	-0.156058	0.0790311	-1.97464	0.0483088	0.355103	Rrm2b	protein_coding
ENSMUSG00000054309	1071.29	0.154828	0.0784086	1.97463	0.0483102	0.355103	Cpsf3	protein_coding
ENSMUSG00000019837	393.049	0.309375	0.156609	1.97546	0.0482156	0.355103	Gtf3c6	protein_coding
ENSMUSG00000029655	987.158	0.134517	0.0681675	1.97333	0.0484579	0.355766	N4bp2l2	protein_coding
ENSMUSG00000031508	530.331	0.193807	0.09824	1.97279	0.048519	0.355766	Ankrd10	protein_coding
ENSMUSG00000036585	6149.74	0.211936	0.107422	1.97293	0.0485041	0.355766	Fgf1	protein_coding
ENSMUSG00000029176	752.632	0.172639	0.0875272	1.97241	0.048563	0.355799	Anapc4	protein_coding
ENSMUSG00000032330	3117.1	-0.141805	0.0719102	-1.97198	0.0486124	0.355872	Cox7a2	protein_coding	mitochondrion
ENSMUSG00000020720	1899.36	0.159585	0.0809687	1.97094	0.0487305	0.356446	Psmd12	protein_coding
ENSMUSG00000010914	875.878	-0.194514	0.098808	-1.9686	0.048999	0.357248	Pdhx	protein_coding	mitochondrion
ENSMUSG00000028488	9916.03	-0.183661	0.0932606	-1.96933	0.0489147	0.357248	Sh3gl2	protein_coding
ENSMUSG00000010086	701.337	0.146756	0.0745448	1.9687	0.0489879	0.357248	Rnf112	protein_coding
ENSMUSG00000048429	977.014	-0.135842	0.0689941	-1.96889	0.0489657	0.357248	Timm29	protein_coding
ENSMUSG00000020361	4921.48	0.109166	0.0554667	1.96814	0.0490514	0.357255	Hspa4	protein_coding
ENSMUSG00000021577	6207.51	0.149929	0.0761873	1.9679	0.0490794	0.357255	Sdha	protein_coding
ENSMUSG00000000088	4333.67	-0.147316	0.074956	-1.96537	0.0493712	0.358798	Cox5a	protein_coding
ENSMUSG00000022840	2077.69	-0.114344	0.0581769	-1.96546	0.0493615	0.358798	Adcy5	protein_coding
ENSMUSG00000059401	486.297	-0.211017	0.107414	-1.96452	0.0494704	0.358963	Mamld1	protein_coding
ENSMUSG00000021573	7260.51	0.217608	0.110771	1.96449	0.0494736	0.358963	Tppp	protein_coding
ENSMUSG00000060073	1322.05	-0.13916	0.0708866	-1.96314	0.0496301	0.359385	Psma3	protein_coding
ENSMUSG00000057406	1924.52	0.137543	0.0700695	1.96295	0.0496516	0.359385	Nsd2	protein_coding
ENSMUSG00000059263	1463.14	0.193991	0.0988118	1.96324	0.0496188	0.359385	Usp47	protein_coding
ENSMUSG00000004113	1134.56	0.135848	0.0692436	1.96188	0.0497761	0.359532	Cacna1b	protein_coding
ENSMUSG00000028149	8619.99	-0.226587	0.115503	-1.96175	0.0497919	0.359532	Rap1gds1	protein_coding
ENSMUSG00000014867	1073.09	-0.135693	0.0691509	-1.96228	0.04973	0.359532	Surf4	protein_coding
ENSMUSG00000044288	1916.11	-0.183467	0.0935745	-1.96065	0.0499199	0.35988	Cnr1	protein_coding
ENSMUSG00000015243	1005.59	0.218218	0.111293	1.96075	0.0499078	0.35988	Abca1	protein_coding
ENSMUSG00000023809	1043.59	-0.147896	0.0754644	-1.95982	0.0500172	0.360079	Rps6ka2	protein_coding
ENSMUSG00000066232	3062.78	0.15633	0.0797713	1.95973	0.0500277	0.360079	Ipo7	protein_coding
ENSMUSG00000051022	425.567	-0.272252	0.138999	-1.95866	0.0501526	0.36069	Hs3st1	protein_coding
ENSMUSG00000056579	1866.25	-0.128186	0.0654617	-1.95819	0.0502081	0.3608	Tug1	protein_coding
ENSMUSG00000055296	2050.5	-0.163239	0.0834618	-1.95586	0.0504821	0.36248	Tmem245	protein_coding
ENSMUSG00000020982	499.543	0.241445	0.123478	1.95536	0.0505406	0.36261	Nemf	protein_coding
ENSMUSG00000068039	2754.64	0.230983	0.118193	1.95428	0.050668	0.363235	Tcp1	protein_coding
ENSMUSG00000027803	630.429	-0.211237	0.108325	-1.95003	0.0511724	0.363641	Wwtr1	protein_coding
ENSMUSG00000039100	5473.69	-0.178207	0.0914012	-1.94972	0.0512096	0.363641	Marchf6	protein_coding
ENSMUSG00000052040	1292.97	-0.167855	0.0860643	-1.95035	0.0511346	0.363641	Klf13	protein_coding
ENSMUSG00000000826	7939.73	-0.16382	0.0839792	-1.95072	0.0510901	0.363641	Dnajc5	protein_coding
ENSMUSG00000024431	2278.31	-0.162441	0.0833127	-1.94978	0.0512022	0.363641	Nr3c1	protein_coding
ENSMUSG00000070056	802.312	-0.159834	0.0819385	-1.95065	0.0510981	0.363641	Mfhas1	protein_coding
ENSMUSG00000038412	1066.2	0.142826	0.0731548	1.95238	0.0508933	0.363641	Higd1a	protein_coding
ENSMUSG00000026024	555.561	0.144506	0.0740171	1.95234	0.0508982	0.363641	Als2	protein_coding
ENSMUSG00000026754	692.645	0.223282	0.114364	1.95238	0.0508927	0.363641	Golga1	protein_coding
ENSMUSG00000025980	1411.98	0.252786	0.129622	1.95018	0.0511547	0.363641	Hspd1	protein_coding
ENSMUSG00000025616	522.164	0.267216	0.136844	1.9527	0.0508546	0.363641	Usp16	protein_coding
ENSMUSG00000021270	5719.25	0.570242	0.29231	1.95081	0.0510795	0.363641	Hsp90aa1	protein_coding
ENSMUSG00000040374	514.738	-0.177715	0.0911736	-1.94919	0.0512722	0.363798	Pex2	protein_coding
ENSMUSG00000049148	273.981	0.314961	0.161697	1.94785	0.051433	0.364237	Plcxd3	protein_coding
ENSMUSG00000029093	713.427	-0.225702	0.115845	-1.94831	0.0513776	0.364237	Sorcs2	protein_coding
ENSMUSG00000047866	1267.75	0.148558	0.076275	1.94766	0.0514555	0.364237	Lonp2	protein_coding
ENSMUSG00000044176	282.144	0.274068	0.140881	1.94539	0.0517276	0.365753	Spink10	protein_coding
ENSMUSG00000004798	2042.17	-0.17745	0.0912577	-1.9445	0.0518357	0.365753	Ulk2	protein_coding
ENSMUSG00000020311	1206.56	-0.141305	0.0726807	-1.94419	0.0518729	0.365753	Erlec1	protein_coding
ENSMUSG00000022708	3023.42	0.189973	0.0977067	1.94432	0.0518574	0.365753	Zbtb20	protein_coding
ENSMUSG00000033883	641.722	0.276318	0.14211	1.9444	0.051847	0.365753	Zfp267	protein_coding
ENSMUSG00000035245	405.842	0.185271	0.095423	1.94158	0.0521879	0.367685	Eogt	protein_coding
ENSMUSG00000020333	9263.69	0.117557	0.0605692	1.94086	0.0522749	0.36801	Acsl6	protein_coding
ENSMUSG00000041272	326.139	-0.308166	0.158887	-1.93953	0.0524368	0.368571	Tox	protein_coding
ENSMUSG00000000058	1019.69	-0.197609	0.101911	-1.93904	0.052496	0.368571	Cav2	protein_coding
ENSMUSG00000035189	1025.07	0.130365	0.0672378	1.93886	0.0525184	0.368571	Ano4	protein_coding
ENSMUSG00000064215	365.89	0.244581	0.126117	1.93931	0.0524632	0.368571	Ifi27	protein_coding
ENSMUSG00000026341	2615.76	-0.145998	0.0753354	-1.93798	0.052626	0.368751	Actr3	protein_coding
ENSMUSG00000022811	1463.33	0.197399	0.101841	1.93831	0.052585	0.368751	Zfp148	protein_coding
ENSMUSG00000023033	8902.08	0.144951	0.0748081	1.93763	0.0526683	0.36876	Scn8a	protein_coding
ENSMUSG00000042010	282.677	-0.245373	0.126789	-1.93528	0.052956	0.369119	Acacb	protein_coding	mitochondrion
ENSMUSG00000036510	885.854	-0.220665	0.114145	-1.9332	0.0532114	0.369119	Cdh8	protein_coding
ENSMUSG00000058897	834.39	-0.195006	0.100766	-1.93523	0.0529618	0.369119	Col25a1	protein_coding
ENSMUSG00000029211	477.249	-0.193212	0.0999617	-1.93286	0.053253	0.369119	Gabra4	protein_coding
ENSMUSG00000016179	708.377	-0.130636	0.0675839	-1.93295	0.0532426	0.369119	Camk1g	protein_coding
ENSMUSG00000027350	2974.2	0.206538	0.106735	1.93506	0.052983	0.369119	Chgb	protein_coding
ENSMUSG00000034488	9356.17	-0.197286	0.101976	-1.93463	0.0530359	0.369119	Edil3	protein_coding
ENSMUSG00000050891	551.029	-0.167235	0.086482	-1.93376	0.0531427	0.369119	Tatdn1	protein_coding
ENSMUSG00000073131	1913.15	-0.166225	0.0859689	-1.93355	0.0531685	0.369119	Vma21	protein_coding
ENSMUSG00000028868	920.406	-0.164757	0.0850969	-1.93611	0.052854	0.369119	Wasf2	protein_coding
ENSMUSG00000042688	3642.4	0.130759	0.0675103	1.93687	0.0527613	0.369119	Mapk6	protein_coding
ENSMUSG00000061028	476.411	0.162856	0.084198	1.93421	0.0530877	0.369119	Clasrp	protein_coding
ENSMUSG00000036257	1850.57	0.170046	0.0879692	1.93302	0.0532339	0.369119	Pnpla8	protein_coding
ENSMUSG00000031352	919.393	-0.131414	0.0680051	-1.93241	0.0533089	0.369223	Hccs	protein_coding	mitochondrion
ENSMUSG00000022426	701.678	-0.15359	0.0795437	-1.93089	0.053497	0.37024	Josd1	protein_coding
ENSMUSG00000038388	938.048	-0.11541	0.0597962	-1.93006	0.0535998	0.370667	Pals2	protein_coding
ENSMUSG00000078429	825.92	-0.132225	0.0685426	-1.92909	0.05372	0.370928	Ctdsp2	protein_coding
ENSMUSG00000061950	485.108	0.154731	0.0801983	1.92935	0.0536876	0.370928	Ppp4r1	protein_coding
ENSMUSG00000042675	1826.28	0.101552	0.0526625	1.92835	0.0538115	0.371274	Ypel3	protein_coding
ENSMUSG00000100241	825.56	0.332665	0.172594	1.92744	0.0539246	0.37177	Slc18a3	protein_coding
ENSMUSG00000053838	2177.54	-0.131618	0.0683446	-1.92579	0.0541301	0.372901	Nudcd3	protein_coding
ENSMUSG00000028563	600.722	-0.156975	0.0815698	-1.92443	0.0543012	0.373068	Tm2d1	protein_coding
ENSMUSG00000007815	2580.02	-0.134458	0.0698866	-1.92394	0.0543617	0.373068	Rhoa	protein_coding
ENSMUSG00000021913	2556.82	-0.122248	0.0635359	-1.92409	0.0543438	0.373068	Ogdhl	protein_coding
ENSMUSG00000022788	620.346	0.143863	0.0747679	1.92412	0.0543393	0.373068	Fgd4	protein_coding
ENSMUSG00000037617	459.522	0.166459	0.0864802	1.92483	0.0542512	0.373068	Spag1	protein_coding
ENSMUSG00000034648	4324.25	-0.223876	0.116397	-1.92338	0.0544325	0.373269	Lrrn1	protein_coding
ENSMUSG00000031409	388.809	0.177227	0.0921943	1.92232	0.054565	0.373551	Tceal6	protein_coding
ENSMUSG00000042359	2654.11	0.126246	0.0656817	1.92208	0.0545952	0.373551	Osbpl6	protein_coding
ENSMUSG00000032253	1238.31	0.201464	0.104817	1.92206	0.0545982	0.373551	Phip	protein_coding
ENSMUSG00000048109	358.014	-0.189844	0.098806	-1.92138	0.0546842	0.373856	Rbm15	protein_coding
ENSMUSG00000061838	296.971	-0.233316	0.12146	-1.92093	0.0547405	0.373956	Suclg2	protein_coding
ENSMUSG00000029392	490.729	0.167989	0.0874754	1.92042	0.0548054	0.374116	Rilpl1	protein_coding
ENSMUSG00000038957	399.863	-0.169746	0.0884331	-1.91948	0.0549231	0.374306	Edc3	protein_coding
ENSMUSG00000020528	421.261	-0.166411	0.0867222	-1.9189	0.0549971	0.374306	Prpsap2	protein_coding
ENSMUSG00000026229	2384.55	0.128011	0.0666831	1.9197	0.0548964	0.374306	Psmd1	protein_coding
ENSMUSG00000037709	772.606	0.15659	0.0816048	1.91888	0.0549997	0.374306	Fam13a	protein_coding
ENSMUSG00000026247	604.1	-0.242272	0.126294	-1.91832	0.0550703	0.374503	Ecel1	protein_coding
ENSMUSG00000022790	1208.99	-0.208065	0.108524	-1.91723	0.0552086	0.374877	Igsf11	protein_coding
ENSMUSG00000040711	777.636	-0.223011	0.116306	-1.91745	0.0551807	0.374877	Sh3pxd2b	protein_coding
ENSMUSG00000023923	1456.31	-0.209333	0.109309	-1.91505	0.0554867	0.375197	Tbc1d5	protein_coding
ENSMUSG00000032393	4992.96	0.0852049	0.0444959	1.91489	0.055506	0.375197	Dpp8	protein_coding
ENSMUSG00000024270	1033.89	0.153665	0.0802255	1.91542	0.0554393	0.375197	Slc39a6	protein_coding
ENSMUSG00000069094	433.748	0.155171	0.0809984	1.91572	0.0554004	0.375197	Pde7a	protein_coding
ENSMUSG00000002949	446.862	0.217337	0.113496	1.91493	0.0555018	0.375197	Timm44	protein_coding
ENSMUSG00000027695	351.183	0.239855	0.125251	1.91499	0.0554938	0.375197	Pld1	protein_coding
ENSMUSG00000022124	1901.33	-0.09722	0.0507848	-1.91435	0.0555755	0.375385	Fbxl3	protein_coding
ENSMUSG00000062929	4566.09	-0.142762	0.0746055	-1.91356	0.0556763	0.375502	Cfl2	protein_coding
ENSMUSG00000041650	355.413	0.179038	0.0935583	1.91365	0.0556651	0.375502	Pcca	protein_coding
ENSMUSG00000032878	1489.79	-0.185656	0.0971299	-1.91142	0.0559502	0.376867	Ccdc85a	protein_coding
ENSMUSG00000071650	2350.83	-0.103065	0.0539327	-1.91099	0.0560061	0.376867	Ganab	protein_coding
ENSMUSG00000031485	1466.76	0.129637	0.0678485	1.91068	0.0560463	0.376867	Plpbp	protein_coding
ENSMUSG00000027966	377.967	0.233703	0.122284	1.91114	0.0559864	0.376867	Col11a1	protein_coding
ENSMUSG00000032050	3180.44	0.164052	0.0858913	1.91	0.0561333	0.37717	Rdx	protein_coding
ENSMUSG00000006010	998.996	0.186002	0.0974291	1.9091	0.0562486	0.377663	Odr4	protein_coding
ENSMUSG00000025372	580.215	-0.173199	0.0907618	-1.90829	0.0563543	0.377809	Baiap2	protein_coding
ENSMUSG00000007415	1664.85	-0.112576	0.0589921	-1.90832	0.0563493	0.377809	Gatad1	protein_coding
ENSMUSG00000039579	1454.77	-0.123856	0.0649796	-1.90607	0.0566407	0.378681	Grin3a	protein_coding
ENSMUSG00000064293	659.973	0.179682	0.0944948	1.9015	0.0572369	0.378681	Cntn4	protein_coding
ENSMUSG00000038872	943.244	-0.280338	0.147433	-1.90146	0.057242	0.378681	Zfhx3	protein_coding
ENSMUSG00000045598	277.933	-0.222971	0.117119	-1.9038	0.0569367	0.378681	Zfp553	protein_coding
ENSMUSG00000048379	536.707	-0.193437	0.101646	-1.90305	0.0570342	0.378681	Socs4	protein_coding
ENSMUSG00000005897	328.5	-0.183474	0.096491	-1.90147	0.0572409	0.378681	Nr2c1	protein_coding
ENSMUSG00000026393	2365.21	-0.173246	0.0910907	-1.90191	0.0571827	0.378681	Nek7	protein_coding
ENSMUSG00000004383	1472.27	-0.157073	0.082546	-1.90285	0.0570595	0.378681	Large1	protein_coding
ENSMUSG00000033585	4807.02	-0.138491	0.0726804	-1.90549	0.0567168	0.378681	Ndn	protein_coding
ENSMUSG00000040667	1054.72	-0.126377	0.0664156	-1.90282	0.0570639	0.378681	Nup88	protein_coding
ENSMUSG00000040774	934.607	-0.124963	0.0656982	-1.90208	0.0571603	0.378681	Cept1	protein_coding
ENSMUSG00000030890	1129.04	-0.113569	0.0595889	-1.90588	0.0566664	0.378681	Ilk	protein_coding
ENSMUSG00000040697	1012.61	-0.108633	0.0571207	-1.90181	0.0571958	0.378681	Dnajc16	protein_coding
ENSMUSG00000001052	1676.43	0.109042	0.0573351	1.90184	0.0571916	0.378681	Sec24b	protein_coding
ENSMUSG00000039840	937.707	0.139838	0.0733322	1.90691	0.0565316	0.378681	Epg5	protein_coding
ENSMUSG00000036943	933.132	0.156501	0.0821853	1.90425	0.056878	0.378681	Rab8b	protein_coding
ENSMUSG00000002718	1382.55	0.206459	0.108557	1.90185	0.0571906	0.378681	Cse1l	protein_coding
ENSMUSG00000071267	300.824	0.255317	0.13423	1.90209	0.0571592	0.378681	Zfp942	protein_coding
ENSMUSG00000024146	1386.7	-0.119082	0.0626815	-1.89979	0.0574609	0.37985	Cript	protein_coding
ENSMUSG00000035547	669.009	-0.132172	0.0695928	-1.89922	0.0575358	0.380066	Capn5	protein_coding
ENSMUSG00000024558	834.343	-0.135373	0.0712927	-1.89884	0.0575859	0.380118	Mapk4	protein_coding
ENSMUSG00000074749	399.279	0.23297	0.122717	1.89843	0.0576395	0.380193	Kiz	protein_coding
ENSMUSG00000020621	437.699	-0.176922	0.0932179	-1.89794	0.0577034	0.380335	Rdh14	protein_coding
ENSMUSG00000062270	3098.12	-0.103631	0.0546274	-1.89706	0.0578203	0.380826	Morf4l1	protein_coding
ENSMUSG00000042216	1750.2	-0.0971879	0.0512676	-1.8957	0.058	0.381462	Sgsm1	protein_coding
ENSMUSG00000031139	493.407	0.185957	0.0981116	1.89537	0.0580439	0.381462	Mcf2	protein_coding
ENSMUSG00000019872	689.924	-0.186146	0.0982107	-1.89538	0.0580423	0.381462	Smpdl3a	protein_coding
ENSMUSG00000043991	5731.54	0.190117	0.100333	1.89485	0.0581117	0.381628	Pura	protein_coding
ENSMUSG00000025400	832.504	-0.333578	0.176246	-1.89269	0.0583996	0.381801	Tac2	protein_coding
ENSMUSG00000047155	334.576	-0.195114	0.103189	-1.89083	0.0586472	0.381801	Cyp4x1	protein_coding
ENSMUSG00000021198	838.313	0.123401	0.0652285	1.89182	0.0585145	0.381801	Unc79	protein_coding
ENSMUSG00000048376	577.515	-0.263179	0.13914	-1.89147	0.0585619	0.381801	F2r	protein_coding
ENSMUSG00000022722	544.511	-0.159902	0.0845577	-1.89104	0.0586187	0.381801	Arl6	protein_coding
ENSMUSG00000020962	962.644	-0.150323	0.0794713	-1.89154	0.0585522	0.381801	Gtf2a1	protein_coding
ENSMUSG00000028790	2572.57	-0.147898	0.0781958	-1.89139	0.0585729	0.381801	Khdrbs1	protein_coding
ENSMUSG00000042350	2056.15	-0.103789	0.0548328	-1.89283	0.0583809	0.381801	Arel1	protein_coding
ENSMUSG00000001211	6539.83	-0.0814015	0.0430319	-1.89165	0.0585374	0.381801	Agpat3	protein_coding
ENSMUSG00000020739	396.97	0.170479	0.0901428	1.89121	0.058596	0.381801	Nup85	protein_coding
ENSMUSG00000037149	1655.88	0.205441	0.10856	1.89243	0.0584341	0.381801	Ddx1	protein_coding
ENSMUSG00000044072	369.793	0.22935	0.12112	1.89358	0.0582803	0.381801	Eml6	protein_coding
ENSMUSG00000021136	281.124	-0.206159	0.109126	-1.88918	0.058868	0.382631	Smoc1	protein_coding
ENSMUSG00000019852	3599.16	-0.117284	0.0620903	-1.88892	0.0589023	0.382631	Arfgef3	protein_coding
ENSMUSG00000063142	2312.2	0.203323	0.107617	1.88933	0.0588476	0.382631	Kcnma1	protein_coding
ENSMUSG00000025666	4903.19	-0.163211	0.0864327	-1.8883	0.0589858	0.382763	Tmem47	protein_coding
ENSMUSG00000021277	1683.58	0.128772	0.0682008	1.88814	0.0590077	0.382763	Traf3	protein_coding
ENSMUSG00000021978	2047.53	-0.0918349	0.048655	-1.88747	0.059097	0.38279	Extl3	protein_coding
ENSMUSG00000018548	7664.55	0.111018	0.0588101	1.88773	0.0590621	0.38279	Trim37	protein_coding
ENSMUSG00000029238	2039.02	0.167156	0.0886053	1.88653	0.059224	0.383061	Clock	protein_coding
ENSMUSG00000005656	782.812	0.214208	0.113528	1.88682	0.0591845	0.383061	Snx6	protein_coding
ENSMUSG00000026587	4674.42	-0.146036	0.0774519	-1.88551	0.0593614	0.383173	Astn1	protein_coding
ENSMUSG00000029722	571.678	-0.138946	0.0736811	-1.88577	0.0593257	0.383173	Agfg2	protein_coding
ENSMUSG00000028902	429.921	0.246451	0.130712	1.88545	0.0593691	0.383173	Sf3a3	protein_coding
ENSMUSG00000021823	1041	-0.137133	0.0727634	-1.88464	0.0594788	0.383583	Vcl	protein_coding
ENSMUSG00000028309	887.978	0.268564	0.142524	1.88435	0.0595178	0.383583	Rnf20	protein_coding
ENSMUSG00000025816	936.145	-0.176519	0.093692	-1.88403	0.0595609	0.383586	Sec61a2	protein_coding
ENSMUSG00000034620	584.503	-0.148158	0.0787091	-1.88234	0.0597893	0.384232	Rxylt1	protein_coding
ENSMUSG00000021911	761.958	0.136126	0.0723157	1.88238	0.0597841	0.384232	Parg	protein_coding
ENSMUSG00000094870	562.059	0.204898	0.10884	1.88256	0.0597604	0.384232	Zfp131	protein_coding
ENSMUSG00000022895	981.566	-0.156577	0.0832104	-1.8817	0.0598765	0.384517	Ets2	protein_coding
ENSMUSG00000057914	1046.78	0.142836	0.0759568	1.88049	0.0600412	0.384779	Cacnb2	protein_coding
ENSMUSG00000026872	3568.82	0.261531	0.139076	1.88048	0.0600421	0.384779	Zeb2	protein_coding
ENSMUSG00000039182	263.761	0.284028	0.151042	1.88046	0.0600455	0.384779	AW209491	protein_coding
ENSMUSG00000032434	614.477	-0.164245	0.0873621	-1.88005	0.0601016	0.384864	Cmtm6	protein_coding
ENSMUSG00000026878	5430.71	-0.197783	0.105275	-1.87873	0.0602815	0.385127	Rab14	protein_coding
ENSMUSG00000023169	8240.03	-0.151085	0.080429	-1.87849	0.0603138	0.385127	Slc38a1	protein_coding
ENSMUSG00000013236	3878.05	0.12838	0.0683255	1.87894	0.0602526	0.385127	Ptprs	protein_coding
ENSMUSG00000042197	1439.63	0.1458	0.0775829	1.87927	0.0602071	0.385127	Zfp451	protein_coding
ENSMUSG00000031367	2977.12	-0.128582	0.0684685	-1.87797	0.0603854	0.38531	Ap1s2	protein_coding
ENSMUSG00000016487	459.329	0.310061	0.16517	1.87722	0.0604883	0.385693	Ppfibp1	protein_coding
ENSMUSG00000038128	282.976	0.190707	0.101631	1.87646	0.0605916	0.385805	Camk4	protein_coding
ENSMUSG00000032410	717.103	0.206829	0.110219	1.87653	0.0605831	0.385805	Xrn1	protein_coding
ENSMUSG00000039262	8035.85	-0.130595	0.0696217	-1.87577	0.0606864	0.386135	Prrc2b	protein_coding
ENSMUSG00000038630	603.832	0.344497	0.183755	1.87476	0.0608254	0.38658	Zkscan16	protein_coding
ENSMUSG00000034832	860.692	-0.12243	0.0653086	-1.87464	0.0608422	0.38658	Tet3	protein_coding
ENSMUSG00000104346	293.595	-0.253376	0.135218	-1.87383	0.0609533	0.387013	Pcdhga3	protein_coding
ENSMUSG00000029012	507.972	-0.164797	0.08798	-1.87311	0.0610527	0.38737	Orc5	protein_coding
ENSMUSG00000063870	2895.38	0.139872	0.0746915	1.87266	0.0611158	0.387497	Chd4	protein_coding
ENSMUSG00000022472	3150.25	-0.0987373	0.0527463	-1.87193	0.0612163	0.387589	Desi1	protein_coding
ENSMUSG00000033047	1401.84	0.117865	0.0629624	1.872	0.0612069	0.387589	Eif3l	protein_coding
ENSMUSG00000026443	878.784	-0.132859	0.071023	-1.87065	0.061393	0.388276	Lrrn2	protein_coding
ENSMUSG00000040659	2132.91	-0.105971	0.0566531	-1.87052	0.0614113	0.388276	Efhd2	protein_coding
ENSMUSG00000048371	328.96	-0.184002	0.0983882	-1.87017	0.0614609	0.388317	Pdp2	protein_coding
ENSMUSG00000028161	12154.6	-0.0932839	0.0498947	-1.86962	0.0615371	0.388526	Ppp3ca	protein_coding
ENSMUSG00000021238	2408.98	-0.141906	0.0759572	-1.86824	0.061729	0.388729	Aldh6a1	protein_coding
ENSMUSG00000102918	1095.72	-0.119447	0.063949	-1.86785	0.061783	0.388729	Pcdhgc3	protein_coding
ENSMUSG00000033557	2990.1	-0.117972	0.06316	-1.86783	0.0617852	0.388729	Fam20b	protein_coding
ENSMUSG00000069662	4017.48	-0.114503	0.0612861	-1.86833	0.0617162	0.388729	Marcks	protein_coding
ENSMUSG00000038975	690.324	0.213077	0.114057	1.86816	0.0617399	0.388729	Rabggtb	protein_coding
ENSMUSG00000022463	3778.05	-0.0990045	0.0530268	-1.86706	0.0618927	0.389132	Srebf2	protein_coding
ENSMUSG00000018583	1218.54	-0.122748	0.0657799	-1.86605	0.0620345	0.389752	G3bp1	protein_coding
ENSMUSG00000003279	2824.16	-0.135695	0.0728025	-1.86388	0.0623385	0.38989	Dlgap1	protein_coding
ENSMUSG00000029245	1134.1	0.134573	0.0721861	1.86425	0.0622866	0.38989	Epha5	protein_coding
ENSMUSG00000029265	863.594	-0.215878	0.11585	-1.86342	0.0624031	0.38989	Dr1	protein_coding
ENSMUSG00000061119	401.279	-0.230409	0.123574	-1.86454	0.0622456	0.38989	Prcp	protein_coding
ENSMUSG00000004031	670.599	-0.1983	0.1064	-1.86372	0.0623607	0.38989	Brinp2	protein_coding
ENSMUSG00000017466	10175	-0.109628	0.0587682	-1.86543	0.0621217	0.38989	Timp2	protein_coding
ENSMUSG00000037553	497.901	0.141824	0.0760772	1.8642	0.0622929	0.38989	Zdhhc18	protein_coding
ENSMUSG00000024474	1369.13	0.226169	0.12135	1.86378	0.0623532	0.38989	Ik	protein_coding
ENSMUSG00000031537	579.665	0.144209	0.0774043	1.86305	0.0624545	0.38994	Ikbkb	protein_coding
ENSMUSG00000041710	312.953	0.235283	0.126325	1.86252	0.0625294	0.38998	Trpc5	protein_coding
ENSMUSG00000050812	1862.14	0.171438	0.0920524	1.86239	0.0625477	0.38998	Ecpas	protein_coding
ENSMUSG00000024614	2564.47	-0.132186	0.0709934	-1.86194	0.0626113	0.390106	Tmx3	protein_coding
ENSMUSG00000035392	905.341	-0.155854	0.0837432	-1.86109	0.0627308	0.390581	Dennd1a	protein_coding
ENSMUSG00000022827	299.576	-0.198025	0.106434	-1.86054	0.0628095	0.3908	Rabl3	protein_coding
ENSMUSG00000024981	509.859	0.187012	0.100593	1.85909	0.0630142	0.391803	Acsl5	protein_coding
ENSMUSG00000051951	451.207	0.203608	0.109553	1.85854	0.0630926	0.392019	Xkr4	protein_coding
ENSMUSG00000045312	620.968	-0.16014	0.0861917	-1.85795	0.0631764	0.392159	Lhfpl2	protein_coding
ENSMUSG00000047554	656.773	-0.141333	0.0760792	-1.85771	0.0632095	0.392159	Tmem41b	protein_coding
ENSMUSG00000020078	1509.87	-0.116274	0.0625986	-1.85746	0.0632458	0.392159	Vps26a	protein_coding
ENSMUSG00000007908	285.742	-0.214428	0.115488	-1.85671	0.0633528	0.392347	Hmgcll1	protein_coding
ENSMUSG00000005686	787.37	0.116688	0.0628596	1.85633	0.063407	0.392347	Ampd3	protein_coding
ENSMUSG00000018848	482.913	0.284399	0.153203	1.85635	0.0634031	0.392347	Rars1	protein_coding
ENSMUSG00000026458	1116.11	-0.124583	0.0671286	-1.85588	0.0634702	0.392468	Ppfia4	protein_coding
ENSMUSG00000026701	5315	-0.171762	0.0925893	-1.8551	0.0635822	0.392891	Prdx6	protein_coding
ENSMUSG00000064344	4274.05	0.219123	0.118309	1.85214	0.0640064	0.393925	mt-Tm	Mt_tRNA
ENSMUSG00000026753	1349.51	-0.113831	0.061457	-1.85221	0.0639958	0.393925	Ppp6c	protein_coding
ENSMUSG00000020849	17959.6	-0.104508	0.0564159	-1.85246	0.0639593	0.393925	Ywhae	protein_coding
ENSMUSG00000030428	9561.63	-0.101269	0.0546783	-1.85209	0.0640122	0.393925	Ttyh1	protein_coding
ENSMUSG00000027175	1842.58	0.112712	0.0608288	1.85294	0.0638906	0.393925	Tcp11l1	protein_coding
ENSMUSG00000027423	1989.44	0.159756	0.0861886	1.85357	0.0638009	0.393925	Snx5	protein_coding
ENSMUSG00000001995	2135.15	-0.114827	0.0620401	-1.85085	0.064191	0.39451	Sipa1l2	protein_coding
ENSMUSG00000042446	1299.12	0.128637	0.0695027	1.85082	0.064195	0.39451	Zmym4	protein_coding
ENSMUSG00000021877	2355.42	-0.176156	0.095249	-1.84942	0.0643966	0.395422	Arf4	protein_coding
ENSMUSG00000042354	348.654	0.207333	0.112121	1.84918	0.0644313	0.395422	Gnl3	protein_coding
ENSMUSG00000024099	5407.55	-0.162222	0.0878156	-1.8473	0.064704	0.395477	Ndufv2	protein_coding
ENSMUSG00000024758	26793.1	-0.11797	0.0638482	-1.84767	0.0646503	0.395477	Rtn3	protein_coding
ENSMUSG00000037706	8711.31	-0.0746623	0.0404076	-1.84773	0.0646418	0.395477	Cd81	protein_coding
ENSMUSG00000044042	448.539	0.196009	0.106055	1.84818	0.0645765	0.395477	Fmn1	protein_coding
ENSMUSG00000029283	343.364	0.205407	0.111189	1.84736	0.0646944	0.395477	Cdc7	protein_coding
ENSMUSG00000027714	362.917	0.219024	0.118515	1.84807	0.0645926	0.395477	Exosc9	protein_coding
ENSMUSG00000043872	279.624	0.238662	0.129223	1.8469	0.064762	0.395562	Zmym1	protein_coding
ENSMUSG00000102252	6915.59	-0.225613	0.122206	-1.84616	0.0648683	0.395593	Snrpn	protein_coding
ENSMUSG00000053333	468.383	-0.201994	0.109425	-1.84595	0.064899	0.395593	Dis3l2	protein_coding
ENSMUSG00000020198	3290.12	0.0731697	0.0396299	1.84633	0.0648446	0.395593	Ap3d1	protein_coding
ENSMUSG00000033871	267.255	0.192169	0.104146	1.84519	0.06501	0.396002	Ppargc1b	protein_coding	mitochondrion
ENSMUSG00000025239	322.806	-0.296388	0.160664	-1.84477	0.0650709	0.396105	Limd1	protein_coding
ENSMUSG00000026032	803.142	-0.173674	0.0941741	-1.84418	0.0651571	0.396362	Ndufb3	protein_coding
ENSMUSG00000042650	1122.12	-0.137052	0.0743578	-1.84315	0.0653076	0.396741	Alkbh5	protein_coding
ENSMUSG00000038280	1233.52	0.148922	0.0807973	1.84316	0.0653054	0.396741	Ostm1	protein_coding
ENSMUSG00000022311	687.815	0.175766	0.0953975	1.84246	0.0654081	0.397083	Csmd3	protein_coding
ENSMUSG00000035150	556.048	-0.176309	0.0957111	-1.8421	0.0654612	0.397137	Eif2s3x	protein_coding
ENSMUSG00000078515	1524.43	0.103685	0.0563051	1.84148	0.0655512	0.397415	Ddi2	protein_coding
ENSMUSG00000025245	890.517	0.180042	0.0977892	1.84112	0.0656037	0.397466	Lztfl1	protein_coding
ENSMUSG00000031242	2223.52	-0.161785	0.0878965	-1.84063	0.0656758	0.397634	Chmp1b2	protein_coding
ENSMUSG00000072640	999.156	0.138398	0.0752335	1.83958	0.0658306	0.398036	Lyrm9	protein_coding
ENSMUSG00000037416	1639.75	0.177758	0.0966156	1.83985	0.0657903	0.398036	Dmxl1	protein_coding
ENSMUSG00000040856	1876.09	-0.125559	0.0682803	-1.83888	0.0659329	0.398219	Dlk1	protein_coding
ENSMUSG00000054408	996.343	-0.122715	0.0667402	-1.8387	0.0659591	0.398219	Spcs3	protein_coding
ENSMUSG00000029432	1555.66	-0.104449	0.0568195	-1.83826	0.0660247	0.398219	Nipsnap2	protein_coding
ENSMUSG00000027422	1055.83	0.285632	0.15539	1.83817	0.0660379	0.398219	Rrbp1	protein_coding
ENSMUSG00000030064	701.079	0.230624	0.125538	1.83708	0.0661984	0.39892	Frmd4b	protein_coding
ENSMUSG00000018820	726.69	-0.120823	0.0657815	-1.83673	0.0662505	0.398966	Zfyve27	protein_coding
ENSMUSG00000041180	324.118	-0.177138	0.0965645	-1.8344	0.0665948	0.399747	Hectd2	protein_coding
ENSMUSG00000046844	4766.5	-0.12457	0.0678692	-1.83544	0.066441	0.399747	Vat1l	protein_coding
ENSMUSG00000020321	12631	-0.115128	0.0627621	-1.83435	0.0666023	0.399747	Mdh1	protein_coding
ENSMUSG00000031839	3208.05	0.145475	0.0792997	1.8345	0.06658	0.399747	Hsbp1	protein_coding
ENSMUSG00000026490	6579.03	0.178831	0.0974837	1.83448	0.0665834	0.399747	Cdc42bpa	protein_coding
ENSMUSG00000030323	491.756	0.158623	0.0864897	1.83401	0.066652	0.399779	Ift122	protein_coding
ENSMUSG00000097164	671.76	-0.183358	0.100031	-1.83301	0.0668017	0.400143	Cep83os	lncRNA
ENSMUSG00000035206	501.961	0.171301	0.0934527	1.83303	0.0667986	0.400143	Sppl2b	protein_coding
ENSMUSG00000003948	1018.37	-0.150326	0.0820252	-1.83268	0.0668505	0.400169	Mmd	protein_coding
ENSMUSG00000028719	1727.46	-0.192851	0.105313	-1.83122	0.0670679	0.401027	Cmpk1	protein_coding
ENSMUSG00000028967	1946.1	-0.163369	0.0892327	-1.83082	0.0671275	0.401027	Errfi1	protein_coding
ENSMUSG00000020836	635.088	0.2237	0.122183	1.83087	0.0671201	0.401027	Coro6	protein_coding
ENSMUSG00000020614	437.553	-0.208749	0.114082	-1.82982	0.0672773	0.401655	Fam20a	protein_coding
ENSMUSG00000058153	2311.64	-0.114339	0.0625009	-1.82939	0.0673409	0.401768	Sez6l	protein_coding
ENSMUSG00000024855	932.688	-0.188749	0.103198	-1.82901	0.0673984	0.401772	Pacs1	protein_coding
ENSMUSG00000025429	316.7	0.234633	0.1283	1.82879	0.0674308	0.401772	Pstpip2	protein_coding
ENSMUSG00000024359	3302.19	0.1389	0.0759777	1.82816	0.0675249	0.401948	Hspa9	protein_coding
ENSMUSG00000024998	826.608	0.242558	0.132691	1.828	0.0675497	0.401948	Plce1	protein_coding
ENSMUSG00000097431	1431.79	0.176925	0.0969356	1.82518	0.0679735	0.40287	Gm26782	lncRNA
ENSMUSG00000017493	327.295	-0.27129	0.148567	-1.82605	0.0678435	0.40287	Igfbp4	protein_coding
ENSMUSG00000050312	347.796	-0.181617	0.0994818	-1.82563	0.0679061	0.40287	Nsun3	protein_coding
ENSMUSG00000070639	2250.1	-0.111715	0.0611667	-1.82641	0.0677889	0.40287	Lrrc8b	protein_coding
ENSMUSG00000014426	1077.93	0.110765	0.060687	1.82519	0.0679731	0.40287	Map3k4	protein_coding
ENSMUSG00000004535	1968.6	0.230682	0.126307	1.82637	0.0677953	0.40287	Tax1bp1	protein_coding
ENSMUSG00000039706	695.076	-0.146041	0.0800671	-1.82398	0.0681548	0.403679	Ldb2	protein_coding
ENSMUSG00000015189	1243.26	-0.105835	0.0580443	-1.82335	0.0682501	0.403712	Casd1	protein_coding
ENSMUSG00000029617	739.444	0.142381	0.078076	1.82362	0.0682091	0.403712	Ccz1	protein_coding
ENSMUSG00000121832	270.913	0.210042	0.115281	1.822	0.0684552	0.404394	Gm5124	lncRNA
ENSMUSG00000067424	296.843	0.202301	0.111022	1.82217	0.0684292	0.404394	Zfp563	protein_coding
ENSMUSG00000027601	314.922	-0.189111	0.103975	-1.81881	0.0689397	0.40459	Mtfr1	protein_coding	mitochondrion
ENSMUSG00000020297	4347.97	-0.111025	0.0610915	-1.81735	0.069163	0.40459	Nsg2	protein_coding
ENSMUSG00000074415	997.591	0.193924	0.106507	1.82076	0.0686433	0.40459	Mir100hg	lncRNA
ENSMUSG00000036327	361.214	-0.177635	0.097674	-1.81866	0.0689639	0.40459	Qsox2	protein_coding
ENSMUSG00000021967	502.981	-0.155299	0.0854034	-1.81841	0.0690008	0.40459	Mrpl57	protein_coding
ENSMUSG00000038351	882.233	-0.151154	0.0830869	-1.81923	0.0688761	0.40459	Sgsm2	protein_coding
ENSMUSG00000028691	2885.23	-0.149184	0.0819596	-1.82022	0.0687258	0.40459	Prdx1	protein_coding
ENSMUSG00000026192	731.405	-0.146267	0.0804141	-1.81893	0.0689225	0.40459	Atic	protein_coding
ENSMUSG00000071253	608.044	-0.145975	0.0802895	-1.81811	0.0690474	0.40459	Slc25a16	protein_coding
ENSMUSG00000042305	1207.67	-0.112463	0.0618266	-1.81901	0.0689107	0.40459	Tmem183a	protein_coding
ENSMUSG00000033671	1195.87	0.149865	0.0823891	1.81899	0.0689129	0.40459	Cep350	protein_coding
ENSMUSG00000020687	1395.38	0.155543	0.085429	1.82073	0.0686483	0.40459	Cdc27	protein_coding
ENSMUSG00000031153	1120.64	0.174572	0.0959922	1.81861	0.0689713	0.40459	Gripap1	protein_coding
ENSMUSG00000025766	379.523	0.197858	0.108858	1.81758	0.0691279	0.40459	D3Ertd751e	protein_coding
ENSMUSG00000026491	671.179	0.236663	0.130209	1.81756	0.0691312	0.40459	Ahctf1	protein_coding
ENSMUSG00000060988	978.721	-0.126637	0.0697826	-1.81474	0.0695635	0.4056	Galnt13	protein_coding
ENSMUSG00000022421	1317.78	-0.13099	0.072172	-1.81497	0.0695289	0.4056	Nptxr	protein_coding
ENSMUSG00000035152	5629.56	-0.126384	0.0696537	-1.81447	0.0696061	0.4056	Ap2b1	protein_coding
ENSMUSG00000001911	3567.5	0.138971	0.076567	1.81502	0.0695206	0.4056	Nfix	protein_coding
ENSMUSG00000036333	4309.99	0.193899	0.106849	1.8147	0.06957	0.4056	Kidins220	protein_coding
ENSMUSG00000036499	1047.05	0.242155	0.133351	1.81592	0.0693824	0.4056	Eea1	protein_coding
ENSMUSG00000050069	674.652	-0.166563	0.0918388	-1.81365	0.0697317	0.406069	Grem2	protein_coding
ENSMUSG00000031529	4091.97	0.105548	0.0582063	1.81334	0.0697797	0.406085	Tnks	protein_coding
ENSMUSG00000078185	600.741	0.168564	0.0929917	1.81268	0.0698813	0.406414	Chml	protein_coding
ENSMUSG00000061650	644.809	-0.130332	0.0719261	-1.81203	0.0699821	0.406737	Med9	protein_coding
ENSMUSG00000069072	3979.61	0.13788	0.0761342	1.81101	0.0701391	0.406861	Slc7a14	protein_coding
ENSMUSG00000027327	537.504	-0.150754	0.0832348	-1.81119	0.0701115	0.406861	Adissp	protein_coding
ENSMUSG00000021236	1336.98	-0.147696	0.0815372	-1.81139	0.0700805	0.406861	Entpd5	protein_coding
ENSMUSG00000025982	3717.21	0.149219	0.0824449	1.80992	0.0703079	0.407577	Sf3b1	protein_coding
ENSMUSG00000018199	1605.82	-0.113359	0.0626792	-1.80855	0.0705205	0.408021	Ro60	protein_coding
ENSMUSG00000035232	1118.14	0.120036	0.066363	1.80879	0.0704844	0.408021	Pdk3	protein_coding
ENSMUSG00000020580	2475.92	0.187406	0.103613	1.80871	0.070496	0.408021	Rock2	protein_coding
ENSMUSG00000027799	3428.12	0.128832	0.0713001	1.8069	0.0707786	0.409251	Nbea	protein_coding
ENSMUSG00000043384	9127.04	0.239898	0.132821	1.80617	0.070891	0.409638	Gprasp1	protein_coding
ENSMUSG00000062604	4301.46	0.11062	0.0612651	1.80559	0.070983	0.409906	Srpk2	protein_coding
ENSMUSG00000034292	301.908	0.178777	0.0990516	1.80488	0.0710928	0.410277	Traf3ip1	protein_coding
ENSMUSG00000019710	507.587	0.130746	0.0724642	1.80428	0.0711876	0.410561	Mrpl24	protein_coding
ENSMUSG00000069539	830.371	-0.117298	0.0650317	-1.8037	0.0712788	0.410823	Scyl2	protein_coding
ENSMUSG00000021701	443.205	0.176311	0.0978272	1.80227	0.0715022	0.411847	Plk2	protein_coding
ENSMUSG00000063239	764.557	-0.132402	0.0734786	-1.80191	0.0715599	0.411916	Grm4	protein_coding
ENSMUSG00000055745	527.475	-0.172682	0.0959135	-1.80039	0.0717984	0.411951	Rtl6	protein_coding
ENSMUSG00000041313	1167.3	-0.150499	0.0835651	-1.80098	0.0717066	0.411951	Slc7a1	protein_coding
ENSMUSG00000021870	1930.4	0.0891578	0.0495132	1.80069	0.0717521	0.411951	Slmap	protein_coding
ENSMUSG00000027475	1101.56	0.128635	0.0714452	1.80047	0.0717863	0.411951	Kif3b	protein_coding
ENSMUSG00000068015	783.981	0.147493	0.08191	1.80067	0.0717553	0.411951	Lrch1	protein_coding
ENSMUSG00000028389	269.364	0.352715	0.195939	1.80013	0.0718408	0.411951	Zfp37	protein_coding
ENSMUSG00000022956	1977.09	0.103546	0.0575394	1.79957	0.0719292	0.412196	Atp5po	protein_coding
ENSMUSG00000064338	530.595	-0.18436	0.102509	-1.79849	0.0720996	0.412788	mt-Tv	Mt_tRNA
ENSMUSG00000027438	7330.3	0.206123	0.114619	1.79833	0.0721243	0.412788	Napb	protein_coding
ENSMUSG00000027342	647.933	-0.153036	0.0851208	-1.79787	0.0721976	0.412945	Pcna	protein_coding
ENSMUSG00000070520	356.454	-0.180867	0.10068	-1.79644	0.0724242	0.413977	Nsmce3	protein_coding
ENSMUSG00000024477	492.988	0.273522	0.152321	1.79569	0.0725433	0.414395	Pggt1b	protein_coding
ENSMUSG00000109901	831.881	-0.14992	0.0835847	-1.79363	0.0728715	0.414446	Chmp1b	protein_coding
ENSMUSG00000028274	716.422	-0.155151	0.0865111	-1.79343	0.0729049	0.414446	Rngtt	protein_coding
ENSMUSG00000025262	1268	-0.152096	0.084812	-1.79333	0.0729207	0.414446	Fam120c	protein_coding
ENSMUSG00000026811	738.229	-0.131944	0.0735345	-1.79431	0.072764	0.414446	St6galnac6	protein_coding
ENSMUSG00000004207	21907.8	-0.0761383	0.0424121	-1.7952	0.0726219	0.414446	Psap	protein_coding
ENSMUSG00000038023	2221.58	0.0795338	0.0443291	1.79417	0.0727861	0.414446	Atp6v0a2	protein_coding
ENSMUSG00000021895	936.47	0.195609	0.109003	1.79453	0.0727282	0.414446	Arhgef3	protein_coding
ENSMUSG00000031631	653.112	0.258812	0.144192	1.79491	0.0726687	0.414446	Cfap97	protein_coding
ENSMUSG00000022505	476.461	-0.276135	0.154024	-1.7928	0.0730042	0.414658	Emp2	protein_coding
ENSMUSG00000032458	2132.08	0.0918284	0.0512564	1.79155	0.0732053	0.415276	Copb2	protein_coding
ENSMUSG00000029634	870.072	0.174163	0.0972019	1.79177	0.0731704	0.415276	Rnf6	protein_coding
ENSMUSG00000039431	1186.03	0.135765	0.0757986	1.79114	0.0732716	0.41539	Mtmr7	protein_coding
ENSMUSG00000023991	340.353	0.206473	0.115295	1.79082	0.0733224	0.415417	Foxp4	protein_coding
ENSMUSG00000021194	5064.09	0.0995027	0.0555809	1.79023	0.0734165	0.415688	Chga	protein_coding
ENSMUSG00000025216	267.054	-0.172535	0.0964059	-1.78968	0.0735062	0.415934	Lbx1	protein_coding
ENSMUSG00000019817	1078.29	-0.145909	0.0815927	-1.78826	0.0737334	0.416958	Plagl1	protein_coding
ENSMUSG00000055409	1032.64	-0.165293	0.0925159	-1.78665	0.0739948	0.418139	Nell1	protein_coding
ENSMUSG00000026667	11868.4	-0.115877	0.0648665	-1.7864	0.0740353	0.418139	Uhmk1	protein_coding
ENSMUSG00000020459	301.772	0.203546	0.114068	1.78443	0.0743533	0.419672	Mtif2	protein_coding
ENSMUSG00000031068	1042.12	0.115527	0.0647878	1.78316	0.0745597	0.420309	Glrx3	protein_coding
ENSMUSG00000000804	3232.97	0.147259	0.082577	1.78329	0.0745393	0.420309	Usp32	protein_coding
ENSMUSG00000029253	445.849	0.154126	0.0864611	1.7826	0.0746512	0.420562	Cenpc1	protein_coding
ENSMUSG00000058761	518.522	-0.172143	0.0965996	-1.78202	0.0747456	0.420612	Rnf169	protein_coding
ENSMUSG00000042705	446.761	-0.145775	0.0818278	-1.78149	0.0748326	0.420612	Commd10	protein_coding
ENSMUSG00000057133	2169.48	0.151131	0.0848192	1.7818	0.0747818	0.420612	Chd6	protein_coding
ENSMUSG00000020375	569.89	0.162428	0.0911799	1.7814	0.0748471	0.420612	Rufy1	protein_coding
ENSMUSG00000005802	997.903	-0.1277	0.0717665	-1.77938	0.0751768	0.421387	Slc30a4	protein_coding
ENSMUSG00000041058	2208.04	0.120701	0.0677996	1.78027	0.0750322	0.421387	Wwp1	protein_coding
ENSMUSG00000035772	791.63	0.127944	0.0719142	1.77913	0.0752192	0.421387	Mrps2	protein_coding
ENSMUSG00000038305	458.086	0.195058	0.109634	1.77917	0.0752125	0.421387	Spats2l	protein_coding
ENSMUSG00000029657	5453.38	0.437056	0.245589	1.77963	0.0751373	0.421387	Hsph1	protein_coding
ENSMUSG00000020803	545.193	-0.177567	0.0998508	-1.77832	0.0753515	0.421603	Txndc17	protein_coding
ENSMUSG00000025145	285.355	0.220897	0.124204	1.7785	0.0753212	0.421603	Lrrc45	protein_coding
ENSMUSG00000029669	926.313	-0.158735	0.0893135	-1.77728	0.0755229	0.422299	Tspan12	protein_coding
ENSMUSG00000021720	276.932	-0.22203	0.124956	-1.77686	0.0755916	0.422421	Rnf180	protein_coding
ENSMUSG00000014905	1617.43	-0.188776	0.106297	-1.77592	0.0757459	0.422876	Dnajb9	protein_coding
ENSMUSG00000073096	389.734	-0.161791	0.0911093	-1.77579	0.0757671	0.422876	Lrrc61	protein_coding
ENSMUSG00000031328	868.197	0.149784	0.0843761	1.77519	0.0758659	0.423165	Flna	protein_coding
ENSMUSG00000012296	275.777	0.184172	0.103825	1.77387	0.0760844	0.424121	Tjap1	protein_coding
ENSMUSG00000074909	1083.33	0.250394	0.141188	1.77349	0.0761482	0.424214	Ranbp6	protein_coding
ENSMUSG00000018411	8388.99	0.0653026	0.0368319	1.77299	0.0762307	0.424411	Mapt	protein_coding
ENSMUSG00000070304	2352.03	-0.122196	0.0689532	-1.77216	0.0763681	0.42465	Scn2b	protein_coding
ENSMUSG00000005102	412.427	0.176706	0.0997093	1.77221	0.0763597	0.42465	Eif2ak4	protein_coding
ENSMUSG00000025903	811.084	-0.184826	0.104397	-1.77042	0.076657	0.425752	Lypla1	protein_coding
ENSMUSG00000036898	304.401	0.231915	0.130996	1.7704	0.0766609	0.425752	Zfp157	protein_coding
ENSMUSG00000026347	573.406	-0.150841	0.0852504	-1.76939	0.076829	0.426422	Tmem163	protein_coding
ENSMUSG00000040843	794.866	-0.134788	0.0762345	-1.76807	0.0770484	0.427113	Tiprl	protein_coding
ENSMUSG00000028243	680.008	-0.117264	0.0663213	-1.76811	0.0770417	0.427113	Ubxn2b	protein_coding
ENSMUSG00000015656	17355.7	0.0800134	0.0452646	1.76768	0.0771138	0.427177	Hspa8	protein_coding
ENSMUSG00000038876	900.58	0.121099	0.0685167	1.76744	0.0771548	0.427177	Rnf146	protein_coding
ENSMUSG00000120081	331.51	0.222301	0.125871	1.76609	0.0773805	0.427574	Gm57354	lncRNA
ENSMUSG00000025103	1446.56	-0.155039	0.0877877	-1.76607	0.077384	0.427574	Btbd1	protein_coding
ENSMUSG00000043259	987.817	0.13244	0.0749996	1.76588	0.0774168	0.427574	Fam13c	protein_coding
ENSMUSG00000028907	337.009	0.169839	0.0961323	1.76672	0.0772756	0.427574	Utp11	protein_coding
ENSMUSG00000016494	574.236	-0.224276	0.127033	-1.7655	0.0774796	0.427659	Cd34	protein_coding
ENSMUSG00000038622	402.583	-0.204508	0.115923	-1.76417	0.0777033	0.428368	Med30	protein_coding
ENSMUSG00000011096	410.727	0.148075	0.0839244	1.76438	0.0776677	0.428368	Akt1s1	protein_coding
ENSMUSG00000006369	284.272	-0.184006	0.10434	-1.76354	0.0778103	0.428433	Fbln1	protein_coding
ENSMUSG00000039768	995.218	0.118113	0.0669673	1.76373	0.0777769	0.428433	Dnajc11	protein_coding
ENSMUSG00000031442	2052.09	0.0928809	0.0526799	1.76312	0.0778803	0.428501	Mcf2l	protein_coding
ENSMUSG00000058291	541.593	0.25567	0.145028	1.7629	0.0779179	0.428501	Zfp68	protein_coding
ENSMUSG00000040410	463.94	-0.182865	0.103787	-1.76193	0.0780814	0.429138	Fbxl4	protein_coding
ENSMUSG00000024190	289.699	-0.247736	0.140634	-1.76157	0.0781422	0.429209	Dusp1	protein_coding
ENSMUSG00000051223	2647.33	0.18047	0.10247	1.7612	0.0782047	0.429291	Bzw1	protein_coding
ENSMUSG00000044221	2251.6	0.128109	0.0727519	1.76091	0.078254	0.4293	Grsf1	protein_coding
ENSMUSG00000059920	644.503	-0.138931	0.0789243	-1.76031	0.0783559	0.429335	4930453N24Rik	protein_coding
ENSMUSG00000021431	558.777	0.135252	0.0768304	1.7604	0.0783398	0.429335	Snrnp48	protein_coding
ENSMUSG00000037428	2629.82	-0.271713	0.154393	-1.75988	0.0784273	0.429465	Vgf	protein_coding
ENSMUSG00000050271	504.12	-0.178896	0.101686	-1.7593	0.0785273	0.429489	Prag1	protein_coding
ENSMUSG00000042719	1160.67	0.12248	0.0696116	1.75947	0.0784973	0.429489	Naa25	protein_coding
ENSMUSG00000039578	341.994	-0.171367	0.0974921	-1.75775	0.0787898	0.430615	Ccser1	protein_coding
ENSMUSG00000087598	263.41	0.176066	0.100195	1.75724	0.0788768	0.430615	Zfp111	protein_coding
ENSMUSG00000026083	1017.27	0.262144	0.149158	1.7575	0.078833	0.430615	Eif5b	protein_coding
ENSMUSG00000078652	2668.03	0.0788613	0.0449063	1.75613	0.0790665	0.431128	Psme3	protein_coding
ENSMUSG00000032186	11432.9	0.184797	0.105223	1.75624	0.079047	0.431128	Tmod2	protein_coding
ENSMUSG00000028032	2026.05	-0.148847	0.0848101	-1.75507	0.0792479	0.431275	Papss1	protein_coding
ENSMUSG00000024383	995.017	-0.146786	0.0836384	-1.75501	0.0792583	0.431275	Map3k2	protein_coding
ENSMUSG00000024908	1323.13	0.177282	0.101024	1.75485	0.0792852	0.431275	Ppp6r3	protein_coding
ENSMUSG00000017734	1919.74	0.284534	0.162099	1.75531	0.0792059	0.431275	Dbndd2	protein_coding
ENSMUSG00000028226	399.175	0.178667	0.101835	1.75447	0.0793503	0.431368	Mmp16	protein_coding
ENSMUSG00000038074	316.239	0.18667	0.106414	1.75418	0.0794004	0.43138	Fkbp14	protein_coding
ENSMUSG00000046020	433.881	-0.149798	0.0854363	-1.75333	0.0795457	0.431909	Pofut1	protein_coding
ENSMUSG00000044629	797.894	-0.178738	0.10207	-1.75114	0.0799225	0.432566	Cnrip1	protein_coding
ENSMUSG00000026755	738.708	0.13338	0.0761686	1.75111	0.0799263	0.432566	Arpc5l	protein_coding
ENSMUSG00000030077	2463.9	0.137533	0.0784897	1.75224	0.0797319	0.432566	Chl1	protein_coding
ENSMUSG00000023852	545.86	0.165889	0.0947377	1.75104	0.0799395	0.432566	Chd1	protein_coding
ENSMUSG00000070544	1320.94	0.182209	0.104063	1.75095	0.0799552	0.432566	Top1	protein_coding
ENSMUSG00000037795	270.853	0.250694	0.143159	1.75115	0.0799195	0.432566	N4bp2	protein_coding
ENSMUSG00000058997	1550.13	0.112791	0.0644337	1.7505	0.0800315	0.432718	Vwa8	protein_coding
ENSMUSG00000042042	444.303	-0.155466	0.08886	-1.74956	0.0801937	0.432815	Csgalnact2	protein_coding
ENSMUSG00000033186	1692.62	-0.134312	0.0767575	-1.74982	0.0801493	0.432815	Mzt1	protein_coding
ENSMUSG00000015749	1664.35	0.129719	0.0741428	1.74959	0.0801893	0.432815	Anp32e	protein_coding
ENSMUSG00000015476	1229.57	0.126865	0.0725567	1.74849	0.080379	0.432841	Prrt1	protein_coding
ENSMUSG00000023951	967.93	0.144873	0.0828592	1.74842	0.0803909	0.432841	Vegfa	protein_coding
ENSMUSG00000028618	5546.03	-0.122206	0.069894	-1.74844	0.0803877	0.432841	Tmem59	protein_coding
ENSMUSG00000024654	3398.47	-0.108013	0.0617623	-1.74885	0.0803165	0.432841	Asrgl1	protein_coding
ENSMUSG00000024798	557.231	-0.200939	0.115036	-1.74674	0.0806821	0.434136	Htr7	protein_coding
ENSMUSG00000051232	439.426	-0.145601	0.0833682	-1.74648	0.080728	0.434136	Tmem199	protein_coding
ENSMUSG00000052337	2141.04	0.131817	0.0755061	1.74577	0.0808505	0.434206	Immt	protein_coding
ENSMUSG00000021706	389.922	0.164447	0.0941961	1.74579	0.0808473	0.434206	Zfyve16	protein_coding
ENSMUSG00000075232	512.059	0.219319	0.125643	1.74557	0.0808858	0.434206	Amd1	protein_coding
ENSMUSG00000028291	972.952	-0.202341	0.115953	-1.74503	0.0809798	0.434285	Akirin2	protein_coding
ENSMUSG00000015806	5445.96	-0.121309	0.0695209	-1.74493	0.0809971	0.434285	Qdpr	protein_coding
ENSMUSG00000031026	843.065	-0.172347	0.0988773	-1.74304	0.0813274	0.435268	Trim66	protein_coding
ENSMUSG00000020926	736.499	0.116029	0.0665761	1.7428	0.0813687	0.435268	Adam11	protein_coding
ENSMUSG00000102869	4696.63	0.219569	0.126038	1.74208	0.0814946	0.435268	Norad	lncRNA
ENSMUSG00000043079	300.828	-0.25567	0.146647	-1.74343	0.0812583	0.435268	Synpo	protein_coding
ENSMUSG00000038910	653.45	-0.151739	0.0870886	-1.74235	0.0814478	0.435268	Plcl2	protein_coding
ENSMUSG00000024759	1526.4	-0.12754	0.0732291	-1.74166	0.0815673	0.435268	Atl3	protein_coding
ENSMUSG00000032479	17306	-0.111404	0.0639549	-1.74191	0.0815235	0.435268	Map4	protein_coding
ENSMUSG00000021969	2060.69	0.161029	0.0924514	1.74177	0.0815486	0.435268	Zdhhc20	protein_coding
ENSMUSG00000020149	4124.56	-0.0748893	0.043028	-1.74048	0.0817754	0.436119	Rab1a	protein_coding
ENSMUSG00000047495	395.082	0.144853	0.083253	1.73992	0.0818735	0.436126	Dlgap2	protein_coding
ENSMUSG00000030761	280.806	0.334065	0.191972	1.74017	0.0818289	0.436126	Myo7a	protein_coding
ENSMUSG00000044628	1312.73	0.1107	0.0637375	1.7368	0.082422	0.437235	Rnf208	protein_coding
ENSMUSG00000056812	2251.36	0.145131	0.0835486	1.73708	0.0823728	0.437235	St8sia3	protein_coding
ENSMUSG00000020100	993.001	-0.156661	0.0901622	-1.73755	0.0822899	0.437235	Slc29a3	protein_coding
ENSMUSG00000028614	799.322	-0.123931	0.0713219	-1.73763	0.0822766	0.437235	Ndc1	protein_coding
ENSMUSG00000025555	1181.15	-0.114129	0.0656898	-1.73739	0.0823183	0.437235	Farp1	protein_coding
ENSMUSG00000062209	1755.31	0.111026	0.0638735	1.73822	0.0821727	0.437235	Erbb4	protein_coding
ENSMUSG00000040321	576.351	0.146541	0.0843635	1.73702	0.0823844	0.437235	Zfp770	protein_coding
ENSMUSG00000043929	312.974	-0.205158	0.118148	-1.73646	0.0824834	0.437303	Klhl15	protein_coding
ENSMUSG00000042082	2286.25	-0.172256	0.0992239	-1.73603	0.0825582	0.437442	Arsb	protein_coding
ENSMUSG00000022231	2101.33	-0.160359	0.0924811	-1.73397	0.0829236	0.439119	Sema5a	protein_coding
ENSMUSG00002076083	383.87	0.163046	0.0940539	1.73354	0.0830003	0.439267	Klhl17	protein_coding
ENSMUSG00000028399	6155.2	0.171838	0.0992105	1.73206	0.0832631	0.440398	Ptprd	protein_coding
ENSMUSG00000033712	989.751	-0.111962	0.064664	-1.73144	0.0833724	0.440718	Ccar2	protein_coding
ENSMUSG00000035653	1092.28	-0.151012	0.0873477	-1.72886	0.0838337	0.44114	Lrfn5	protein_coding
ENSMUSG00000021536	1290.16	-0.171135	0.0990138	-1.72839	0.0839178	0.44114	Adcy2	protein_coding
ENSMUSG00000108621	732.282	0.212393	0.12299	1.72692	0.0841825	0.44114	Gm33989	lncRNA
ENSMUSG00000045594	360.193	-0.166453	0.0963082	-1.72834	0.0839281	0.44114	Glb1	protein_coding
ENSMUSG00000046876	1151.95	-0.159011	0.0920273	-1.72786	0.0840125	0.44114	Atxn1	protein_coding
ENSMUSG00000029227	1758	-0.150404	0.0870824	-1.72714	0.0841416	0.44114	Fip1l1	protein_coding
ENSMUSG00000075467	512.38	-0.132277	0.0764612	-1.72999	0.0836314	0.44114	Dnlz	protein_coding
ENSMUSG00000019054	1451.71	-0.107685	0.062358	-1.72689	0.0841878	0.44114	Fis1	protein_coding
ENSMUSG00000024780	6568.07	-0.104066	0.0602201	-1.7281	0.0839699	0.44114	Cdc37l1	protein_coding
ENSMUSG00000038733	2223.03	0.106562	0.0616884	1.72743	0.084091	0.44114	Wdr26	protein_coding
ENSMUSG00000022228	1376.12	0.139884	0.0808815	1.7295	0.0837197	0.44114	Zscan26	protein_coding
ENSMUSG00000068917	419.5	0.151726	0.0877186	1.72969	0.0836851	0.44114	Clk2	protein_coding
ENSMUSG00000022234	2521.64	0.1644	0.0951608	1.7276	0.0840597	0.44114	Cct5	protein_coding
ENSMUSG00000029014	296.082	0.241182	0.139644	1.72713	0.0841452	0.44114	Dnajc2	protein_coding
ENSMUSG00000036572	304.552	0.248981	0.143945	1.7297	0.0836839	0.44114	Upf3b	protein_coding
ENSMUSG00000026697	790.866	-0.543953	0.315054	-1.72654	0.0842508	0.441192	Myoc	protein_coding
ENSMUSG00000032338	352.201	-0.175012	0.101381	-1.72629	0.0842958	0.441192	Hcn4	protein_coding
ENSMUSG00000035247	2235.19	0.205223	0.118919	1.72574	0.0843945	0.441452	Hectd1	protein_coding
ENSMUSG00000028619	338.274	0.16426	0.0951992	1.72544	0.0844489	0.44148	Tceanc2	protein_coding
ENSMUSG00000100801	405.156	0.190845	0.110673	1.7244	0.0846351	0.442131	Gm15459	processed_pseudogene
ENSMUSG00000031393	3139.58	-0.167718	0.097319	-1.72339	0.0848182	0.442131	Mecp2	protein_coding
ENSMUSG00000038848	1140.15	-0.125517	0.072832	-1.72338	0.0848191	0.442131	Ythdf1	protein_coding
ENSMUSG00000055204	2926.56	0.125033	0.0725178	1.72417	0.0846764	0.442131	Ankrd17	protein_coding
ENSMUSG00000028572	540.815	0.230636	0.133797	1.72378	0.0847473	0.442131	Hook1	protein_coding
ENSMUSG00000021816	5592.19	-0.202023	0.117358	-1.72143	0.0851731	0.442397	Ppp3cb	protein_coding
ENSMUSG00000047221	306.413	-0.176846	0.102739	-1.7213	0.0851959	0.442397	Fam185a	protein_coding
ENSMUSG00000085793	403.226	-0.170895	0.09927	-1.72152	0.0851571	0.442397	Lin52	protein_coding
ENSMUSG00000065979	897.964	-0.111998	0.0650111	-1.72275	0.0849329	0.442397	Cpped1	protein_coding
ENSMUSG00000027752	276.224	0.1726	0.100279	1.7212	0.0852143	0.442397	Exosc8	protein_coding
ENSMUSG00000032399	6574.01	0.183162	0.106411	1.72128	0.0851998	0.442397	Rpl4	protein_coding
ENSMUSG00000021998	674.748	0.248908	0.144526	1.72223	0.0850278	0.442397	Lcp1	protein_coding
ENSMUSG00000029430	1773.05	0.110579	0.0642589	1.72084	0.0852804	0.442484	Ran	protein_coding
ENSMUSG00000028351	1300.96	-0.181349	0.10541	-1.72041	0.0853583	0.442509	Brinp1	protein_coding
ENSMUSG00000023830	798.532	0.139736	0.0812293	1.72027	0.0853835	0.442509	Igf2r	protein_coding
ENSMUSG00000036099	1163.37	0.128164	0.074528	1.71968	0.0854907	0.442809	Vezt	protein_coding
ENSMUSG00000055493	678.088	-0.184072	0.10708	-1.71901	0.0856123	0.443184	Epm2a	protein_coding
ENSMUSG00000041360	393.311	0.241068	0.140302	1.71821	0.0857592	0.443689	Pum3	protein_coding
ENSMUSG00000042063	269.187	0.239636	0.139499	1.71784	0.0858264	0.443782	Zfp386	protein_coding
ENSMUSG00000033981	3377.55	0.128014	0.0745419	1.71734	0.0859164	0.443992	Gria2	protein_coding
ENSMUSG00000066551	546.971	0.155014	0.0903124	1.71641	0.0860862	0.444614	Hmgb1	protein_coding
ENSMUSG00000030209	1681.61	0.152374	0.0888427	1.71509	0.0863279	0.445183	Grin2b	protein_coding
ENSMUSG00000058690	3440.74	0.112309	0.0654861	1.715	0.0863448	0.445183	Ccser2	protein_coding
ENSMUSG00000038506	1075.04	0.119732	0.0697925	1.71554	0.0862463	0.445183	Dcun1d2	protein_coding
ENSMUSG00000027087	4550.79	-0.082752	0.0482667	-1.71448	0.0864415	0.445426	Itgav	protein_coding
ENSMUSG00000020396	28988.5	0.155556	0.0907938	1.71329	0.0866597	0.445765	Nefh	protein_coding
ENSMUSG00000022829	873.77	0.191187	0.111581	1.71343	0.0866333	0.445765	Stxbp5l	protein_coding
ENSMUSG00000024462	9551.06	-0.0971571	0.0566953	-1.71367	0.086589	0.445765	Gabbr1	protein_coding
ENSMUSG00000020130	744.397	0.254109	0.148338	1.71304	0.0867055	0.445765	Tbc1d15	protein_coding
ENSMUSG00000029175	625.616	-0.122101	0.0713192	-1.71204	0.0868893	0.445872	Slc35f6	protein_coding
ENSMUSG00000060802	2859.44	0.14937	0.0872567	1.71185	0.0869244	0.445872	B2m	protein_coding
ENSMUSG00000038844	363.288	0.21362	0.124768	1.71214	0.0868711	0.445872	Kif16b	protein_coding
ENSMUSG00000038816	353.646	0.254315	0.148526	1.71226	0.0868488	0.445872	Ctnnal1	protein_coding
ENSMUSG00000046240	3743.78	-0.119528	0.0698579	-1.71101	0.0870787	0.446207	Hepacam	protein_coding
ENSMUSG00000028277	5243	-0.161429	0.09435	-1.71096	0.0870889	0.446207	Ube2j1	protein_coding
ENSMUSG00000040040	408.63	0.160518	0.0938468	1.71042	0.0871879	0.446216	Ift88	protein_coding
ENSMUSG00000006932	5716.04	0.171443	0.100235	1.71041	0.0871899	0.446216	Ctnnb1	protein_coding
ENSMUSG00000061603	5878.5	0.0965517	0.0564754	1.70962	0.0873354	0.446706	Akap6	protein_coding
ENSMUSG00000024231	1454.21	0.104112	0.0609191	1.70902	0.0874478	0.447027	Cul2	protein_coding
ENSMUSG00000041658	1817.59	-0.162551	0.0952072	-1.70734	0.0877584	0.448106	Rragb	protein_coding
ENSMUSG00000030291	929.885	-0.117272	0.0686808	-1.70749	0.0877313	0.448106	Med21	protein_coding
ENSMUSG00000037855	2116.06	-0.0931962	0.0546098	-1.70658	0.0878995	0.448572	Zfp365	protein_coding
ENSMUSG00000037217	9259.28	-0.173869	0.102018	-1.7043	0.0883255	0.44933	Syn1	protein_coding
ENSMUSG00000042686	318.515	-0.270998	0.158981	-1.70459	0.088271	0.44933	Jph1	protein_coding
ENSMUSG00000036781	372.785	-0.208404	0.12228	-1.70432	0.0883208	0.44933	Rps27l	protein_coding
ENSMUSG00000118662	375.492	-0.144826	0.0849819	-1.7042	0.0883446	0.44933	Tctn2	protein_coding
ENSMUSG00000037852	20658.2	-0.0913202	0.0535861	-1.70418	0.0883478	0.44933	Cpe	protein_coding
ENSMUSG00000034377	4858.93	0.0874599	0.0512929	1.70511	0.0881745	0.44933	Tulp4	protein_coding
ENSMUSG00000027520	1327.34	0.108777	0.0638779	1.70288	0.0885898	0.450307	Zdbf2	protein_coding
ENSMUSG00000096188	2334.8	-0.110123	0.0647037	-1.70196	0.0887634	0.45068	Cmtm4	protein_coding
ENSMUSG00000071866	2453.18	0.113578	0.0667272	1.70213	0.0887317	0.45068	Ppia	protein_coding
ENSMUSG00000033543	611.836	-0.163145	0.0959782	-1.69981	0.0891659	0.452468	Gtf2a2	protein_coding
ENSMUSG00000062078	25582.9	-0.165444	0.0974044	-1.69853	0.0894085	0.453188	Qki	protein_coding
ENSMUSG00000025060	1153.27	0.167265	0.0984659	1.69871	0.0893738	0.453188	Slk	protein_coding
ENSMUSG00000028763	274.427	-0.279135	0.164429	-1.6976	0.0895826	0.453552	Hspg2	protein_coding
ENSMUSG00000022965	721.982	-0.133689	0.0788009	-1.69654	0.0897828	0.453552	Ifngr2	protein_coding
ENSMUSG00000028381	2374.28	-0.11155	0.065748	-1.69663	0.0897668	0.453552	Ugcg	protein_coding
ENSMUSG00000037902	3201.4	-0.0838146	0.0493717	-1.69762	0.0895786	0.453552	Sirpa	protein_coding
ENSMUSG00000021868	569.155	0.121351	0.071528	1.69655	0.0897815	0.453552	Ppif	protein_coding
ENSMUSG00000047248	640.446	0.145755	0.0858919	1.69696	0.0897046	0.453552	C2cd3	protein_coding
ENSMUSG00000050627	1356.12	-0.100904	0.059537	-1.69482	0.0901104	0.454696	Gpd1l	protein_coding
ENSMUSG00000020697	522.821	0.153163	0.0903598	1.69503	0.0900699	0.454696	Lig3	protein_coding
ENSMUSG00000059208	1307.82	0.114672	0.0676867	1.69416	0.0902358	0.454819	Hnrnpm	protein_coding
ENSMUSG00000028495	875.582	0.253128	0.149407	1.69421	0.0902245	0.454819	Rps6	protein_coding
ENSMUSG00000021000	1296.83	0.0990671	0.0585747	1.69129	0.0907806	0.457053	Mia2	protein_coding
ENSMUSG00000028053	2419.96	0.113509	0.0671082	1.69143	0.0907546	0.457053	Ash1l	protein_coding
ENSMUSG00000035236	1280.42	0.138778	0.082115	1.69005	0.0910187	0.457995	Scai	protein_coding
ENSMUSG00000030232	1436.07	0.123036	0.0728154	1.6897	0.0910856	0.458076	Aebp2	protein_coding
ENSMUSG00000014592	12348	0.104244	0.0617113	1.68922	0.0911782	0.458285	Camta1	protein_coding
ENSMUSG00000039068	653.859	0.216332	0.12809	1.6889	0.0912381	0.45833	Zzz3	protein_coding
ENSMUSG00000056666	347.136	-0.215634	0.127848	-1.68664	0.0916718	0.459333	Retsat	protein_coding
ENSMUSG00000039458	346.583	-0.152262	0.0902296	-1.6875	0.091508	0.459333	Mtmr12	protein_coding
ENSMUSG00000032002	971.825	-0.132888	0.0787744	-1.68694	0.0916149	0.459333	Dcun1d5	protein_coding
ENSMUSG00000028917	2279.62	0.088163	0.052274	1.68655	0.0916891	0.459333	Plekhm2	protein_coding
ENSMUSG00000026526	1532.44	0.115534	0.0685039	1.68653	0.091693	0.459333	Fh1	protein_coding
ENSMUSG00000064347	298.224	-0.224956	0.133419	-1.68609	0.0917789	0.459507	mt-Ta	Mt_tRNA
ENSMUSG00000028556	674.661	0.218901	0.129866	1.6856	0.0918729	0.459722	Dock7	protein_coding
ENSMUSG00000022545	540.693	-0.144101	0.0855111	-1.68517	0.0919561	0.459883	Ercc4	protein_coding
ENSMUSG00000003644	456.707	-0.146071	0.086697	-1.68485	0.0920173	0.459933	Rps6ka1	protein_coding
ENSMUSG00000025905	269.748	-0.182294	0.108296	-1.68329	0.0923185	0.460416	Oprk1	protein_coding
ENSMUSG00000036019	629.135	-0.191098	0.113526	-1.6833	0.0923172	0.460416	Tmtc2	protein_coding
ENSMUSG00000042185	369.037	-0.143243	0.0850922	-1.68338	0.0923012	0.460416	Nfrkb	protein_coding
ENSMUSG00000055675	1550.37	-0.135115	0.0802588	-1.68349	0.0922811	0.460416	Kbtbd11	protein_coding
ENSMUSG00000030621	508.666	-0.181929	0.108125	-1.68258	0.0924558	0.460845	Me3	protein_coding
ENSMUSG00000038042	928.533	-0.15318	0.0910831	-1.68176	0.0926149	0.461313	Ptpdc1	protein_coding
ENSMUSG00000039765	478.69	0.194271	0.11553	1.68157	0.0926523	0.461313	Cc2d2a	protein_coding
ENSMUSG00000028402	1357.41	0.17716	0.105404	1.68078	0.0928051	0.461818	Mpdz	protein_coding
ENSMUSG00000019970	4369.07	-0.474878	0.282867	-1.6788	0.0931901	0.463478	Sgk1	protein_coding
ENSMUSG00000055430	12352	0.144023	0.0858035	1.67852	0.0932458	0.463499	Nap1l5	protein_coding
ENSMUSG00000029064	9001.27	-0.113988	0.0679311	-1.67799	0.0933491	0.463756	Gnb1	protein_coding
ENSMUSG00000074093	2686.86	-0.087887	0.0523902	-1.67755	0.0934357	0.463926	Svip	protein_coding
ENSMUSG00000046862	321.862	0.149261	0.0889893	1.67729	0.0934865	0.463926	Pramel12	protein_coding
ENSMUSG00000028518	706.878	-0.146833	0.0875654	-1.67684	0.0935743	0.464106	Prkaa2	protein_coding
ENSMUSG00000051355	280.954	-0.173369	0.103456	-1.67578	0.0937823	0.4644	Commd1	protein_coding
ENSMUSG00000025451	1818.52	-0.155556	0.0928636	-1.67511	0.0939132	0.4644	Paip1	protein_coding
ENSMUSG00000043284	403.158	-0.14918	0.0890551	-1.67514	0.093907	0.4644	Tmem11	protein_coding
ENSMUSG00000020176	2431.53	-0.127125	0.0758639	-1.67569	0.0937984	0.4644	Grb10	protein_coding
ENSMUSG00000028134	1927.43	-0.0878839	0.0524777	-1.67469	0.093995	0.4644	Ptbp2	protein_coding
ENSMUSG00000037426	1115.35	0.109435	0.0653149	1.67549	0.0938375	0.4644	Depdc5	protein_coding
ENSMUSG00000064061	2292.34	0.154669	0.0923544	1.67474	0.0939862	0.4644	Dzip3	protein_coding
ENSMUSG00000051329	288.011	0.2003	0.119631	1.67431	0.0940696	0.464514	Nup160	protein_coding
ENSMUSG00000028760	5296.32	0.0728325	0.0435207	1.67351	0.0942265	0.465033	Eif4g3	protein_coding
ENSMUSG00000020532	934.251	0.176273	0.105365	1.67297	0.0943341	0.465309	Acaca	protein_coding
ENSMUSG00000042096	328.404	-0.284237	0.170034	-1.67165	0.0945926	0.465902	Dao	protein_coding
ENSMUSG00000053007	590.502	-0.239295	0.143122	-1.67196	0.0945315	0.465902	Creb5	protein_coding
ENSMUSG00000014771	279.102	-0.197227	0.117989	-1.67157	0.0946097	0.465902	Pdcd2	protein_coding
ENSMUSG00000013495	557.338	-0.144443	0.0864316	-1.67118	0.0946858	0.466022	Tmem175	protein_coding
ENSMUSG00000020589	1673.15	0.236819	0.141776	1.67037	0.0948452	0.466551	Cyria	protein_coding
ENSMUSG00000036198	620.727	0.219502	0.131492	1.66931	0.0950558	0.467076	Arhgap36	protein_coding
ENSMUSG00000045039	1553.04	-0.136766	0.0819201	-1.6695	0.0950177	0.467076	Megf8	protein_coding
ENSMUSG00000038766	313.561	0.20914	0.125309	1.669	0.0951181	0.467127	Gabpb2	protein_coding
ENSMUSG00000020255	995.212	-0.765836	0.458976	-1.66857	0.0952018	0.467283	Nopchap1	protein_coding
ENSMUSG00000021794	8998.26	-0.114993	0.0689284	-1.6683	0.0952558	0.467294	Glud1	protein_coding
ENSMUSG00000039879	877.818	-0.131905	0.0791149	-1.66726	0.0954622	0.467551	Heca	protein_coding
ENSMUSG00000036792	1133.72	0.114761	0.0688324	1.66725	0.0954642	0.467551	Mbd5	protein_coding
ENSMUSG00000031546	294.144	0.232693	0.139538	1.66759	0.0953964	0.467551	Gins4	protein_coding
ENSMUSG00000030283	2638.73	-0.110592	0.0663939	-1.6657	0.0957741	0.468814	St8sia1	protein_coding
ENSMUSG00000048895	1900.51	-0.0960638	0.0576923	-1.66511	0.0958916	0.468879	Cdk5r1	protein_coding
ENSMUSG00000020814	354.709	-0.169176	0.101593	-1.66524	0.0958645	0.468879	Mxra7	protein_coding
ENSMUSG00000038722	707.021	0.117537	0.0706082	1.66463	0.0959858	0.469084	Bud31	protein_coding
ENSMUSG00000027519	1591.86	-0.0891748	0.0536139	-1.66328	0.0962571	0.469645	Rab22a	protein_coding
ENSMUSG00000021215	384.998	-0.316122	0.190011	-1.6637	0.0961722	0.469645	Net1	protein_coding
ENSMUSG00000026496	982.444	0.104211	0.0626489	1.66342	0.0962287	0.469645	Parp1	protein_coding
ENSMUSG00000015120	905.472	0.119125	0.0716436	1.66274	0.0963647	0.469915	Ube2i	protein_coding
ENSMUSG00000026781	1978.3	0.127053	0.0764311	1.66233	0.0964475	0.470064	Acbd5	protein_coding
ENSMUSG00000070394	312.573	-0.158755	0.0955196	-1.66201	0.0965101	0.470114	Tmem256	protein_coding
ENSMUSG00000040506	898.215	-0.195298	0.117622	-1.66039	0.0968359	0.471446	Ambra1	protein_coding
ENSMUSG00000031523	1394.23	-0.150959	0.0909665	-1.6595	0.0970146	0.472061	Dlc1	protein_coding
ENSMUSG00000026923	784.124	-0.165092	0.0995277	-1.65875	0.0971655	0.472377	Notch1	protein_coding
ENSMUSG00000030505	576.651	-0.144966	0.0874079	-1.65849	0.0972179	0.472377	Prmt3	protein_coding
ENSMUSG00000015087	2495.38	0.0817049	0.0492674	1.6584	0.0972371	0.472377	Rabl6	protein_coding
ENSMUSG00000022141	890.698	0.158511	0.095623	1.65767	0.0973846	0.472838	Nipbl	protein_coding
ENSMUSG00000024008	287.169	-0.20641	0.124614	-1.6564	0.0976416	0.473549	Cpne5	protein_coding
ENSMUSG00000079477	4728.37	-0.0872354	0.0526717	-1.65621	0.0976794	0.473549	Rab7	protein_coding
ENSMUSG00000040584	461.561	0.226466	0.136742	1.65616	0.0976888	0.473549	Abcb1a	protein_coding
ENSMUSG00000021510	374.975	0.207424	0.125281	1.65567	0.0977886	0.473777	Zfp729a	protein_coding
ENSMUSG00000031835	1366.76	0.0892681	0.0539258	1.65539	0.0978461	0.4738	Mbtps1	protein_coding
ENSMUSG00000037316	1226.29	-0.125429	0.0757867	-1.65503	0.0979185	0.473896	Bag4	protein_coding
ENSMUSG00000034825	1973.56	-0.102579	0.0620295	-1.65372	0.0981851	0.473914	Nrip3	protein_coding
ENSMUSG00000029233	280.653	-0.173581	0.104942	-1.65407	0.0981142	0.473914	Srd5a3	protein_coding
ENSMUSG00000030407	300.11	-0.167061	0.100982	-1.65436	0.098055	0.473914	Qpctl	protein_coding
ENSMUSG00000021130	3029.76	-0.103045	0.0622722	-1.65475	0.0979751	0.473914	Galnt16	protein_coding
ENSMUSG00000032727	402.922	0.178492	0.107934	1.65371	0.0981855	0.473914	Mier3	protein_coding
ENSMUSG00000033124	962.726	-0.105456	0.0637951	-1.65305	0.0983208	0.474178	Atg9a	protein_coding
ENSMUSG00000029290	443.784	0.1386	0.083851	1.65293	0.0983456	0.474178	Zfp326	protein_coding
ENSMUSG00000058486	426.871	-0.138911	0.0840632	-1.65247	0.0984397	0.47423	Wdr91	protein_coding
ENSMUSG00000007617	894.711	-0.132497	0.0801868	-1.65236	0.098462	0.47423	Homer1	protein_coding
ENSMUSG00000020677	328.813	0.29004	0.17559	1.65181	0.0985741	0.474516	Ddx52	protein_coding
ENSMUSG00000041992	2297.03	0.216111	0.130854	1.65154	0.0986284	0.474524	Rapgef5	protein_coding
ENSMUSG00000066595	394.403	-0.150207	0.0909989	-1.65065	0.0988104	0.474638	Flvcr1	protein_coding	mitochondrion
ENSMUSG00000025016	4570.1	-0.0640432	0.0387892	-1.65106	0.0987268	0.474638	Tm9sf3	protein_coding
ENSMUSG00000014767	622.288	0.127152	0.0770238	1.65081	0.0987774	0.474638	Tbp	protein_coding
ENSMUSG00000058240	1103.29	0.167678	0.101606	1.65027	0.0988871	0.474753	Cryzl1	protein_coding
ENSMUSG00000066357	2252.9	-0.148558	0.0900856	-1.64908	0.0991313	0.474901	Wdr6	protein_coding
ENSMUSG00000042804	508.933	-0.144623	0.0876869	-1.64931	0.0990836	0.474901	Gpr153	protein_coding
ENSMUSG00000052557	746.159	-0.142969	0.0866644	-1.64968	0.0990075	0.474901	Gan	protein_coding
ENSMUSG00000028756	6815.75	-0.0695332	0.0421621	-1.64919	0.0991094	0.474901	Pink1	protein_coding
ENSMUSG00000068284	1041.51	0.152731	0.0926297	1.64883	0.0991818	0.474901	Usf3	protein_coding
ENSMUSG00000015961	2310.35	-0.135943	0.0824791	-1.64821	0.0993096	0.47526	Adss2	protein_coding
ENSMUSG00000035104	372.54	-0.148484	0.0901264	-1.6475	0.0994546	0.475618	Eva1a	protein_coding
ENSMUSG00000030970	588.129	0.12417	0.0753764	1.64733	0.0994902	0.475618	Ctbp2	protein_coding
ENSMUSG00000020664	1960.76	0.149133	0.0905467	1.64703	0.0995528	0.475665	Dld	protein_coding
ENSMUSG00000055567	8894.14	0.0928995	0.0564335	1.64618	0.0997272	0.476245	Unc80	protein_coding
ENSMUSG00000021520	1262.75	-0.163339	0.0993917	-1.64339	0.100303	0.478084	Uqcrb	protein_coding
ENSMUSG00000014606	1437.82	-0.106893	0.0650695	-1.64276	0.100433	0.478084	Slc25a11	protein_coding
ENSMUSG00000042046	1671.08	0.0891321	0.0542169	1.64399	0.100178	0.478084	Dstyk	protein_coding
ENSMUSG00000059119	2556.77	0.106135	0.0645874	1.64327	0.100326	0.478084	Nap1l4	protein_coding
ENSMUSG00000055436	1611.42	0.117084	0.0712776	1.64265	0.100456	0.478084	Srsf11	protein_coding
ENSMUSG00000036615	578.113	0.144331	0.0878363	1.64318	0.100346	0.478084	Rfxap	protein_coding
ENSMUSG00000037236	2782.3	0.158008	0.0961994	1.64251	0.100484	0.478084	Matr3	protein_coding
ENSMUSG00000028042	431.773	-0.156457	0.0952849	-1.64199	0.100592	0.478091	Zbtb7b	protein_coding
ENSMUSG00000054226	1510.3	-0.117516	0.0715644	-1.6421	0.100568	0.478091	Tprkb	protein_coding
ENSMUSG00000003037	740.427	-0.116506	0.0709806	-1.64139	0.100717	0.478434	Rab8a	protein_coding
ENSMUSG00000058655	3998.55	-0.123289	0.0751259	-1.6411	0.100776	0.478461	Eif4b	protein_coding
ENSMUSG00000002844	1165.7	-0.10053	0.0612679	-1.64082	0.100835	0.478487	Adprh	protein_coding
ENSMUSG00000020387	1166.06	-0.126236	0.07695	-1.64049	0.100903	0.47856	Jade2	protein_coding
ENSMUSG00000048304	1075.99	0.120949	0.0738552	1.63765	0.101494	0.480097	Slitrk3	protein_coding
ENSMUSG00000036450	747.054	0.128885	0.0786932	1.63781	0.101461	0.480097	Hif1an	protein_coding
ENSMUSG00000002102	2074.81	0.136984	0.0836177	1.63822	0.101376	0.480097	Psmc3	protein_coding
ENSMUSG00000038252	284.843	0.166919	0.101903	1.63802	0.101417	0.480097	Ncapd2	protein_coding
ENSMUSG00000028409	851.636	0.173204	0.105741	1.638	0.101421	0.480097	Smu1	protein_coding
ENSMUSG00000036896	487.616	-0.28609	0.174773	-1.63692	0.101647	0.480268	C1qc	protein_coding
ENSMUSG00000040249	12743.3	-0.174569	0.106675	-1.63646	0.101744	0.480268	Lrp1	protein_coding
ENSMUSG00000063531	413.561	-0.16816	0.102726	-1.63697	0.101636	0.480268	Sema3e	protein_coding
ENSMUSG00000009291	1217.89	-0.124772	0.0762361	-1.63666	0.101702	0.480268	Pttg1ip	protein_coding
ENSMUSG00000024507	1439.45	-0.116456	0.0712074	-1.63545	0.101955	0.48101	Hsd17b4	protein_coding
ENSMUSG00000022750	1016.6	-0.118524	0.0724857	-1.63514	0.10202	0.481065	Klhl22	protein_coding
ENSMUSG00000024812	1270.27	-0.103343	0.063211	-1.63488	0.102073	0.481066	Tjp2	protein_coding
ENSMUSG00000026280	1097.71	0.106126	0.0649462	1.63405	0.102247	0.481634	Atg4b	protein_coding
ENSMUSG00000048720	745.97	-0.15235	0.0932824	-1.63321	0.102424	0.482213	Tbc1d12	protein_coding
ENSMUSG00000056698	423.255	-0.135524	0.0830133	-1.63255	0.102563	0.482615	Elmod3	protein_coding
ENSMUSG00000035949	999.821	-0.141392	0.086633	-1.63208	0.102663	0.482833	Fbxw2	protein_coding
ENSMUSG00000027495	407.968	-0.146274	0.08971	-1.63052	0.102991	0.482886	Fam210b	protein_coding
ENSMUSG00000075592	502.262	-0.137972	0.0845824	-1.63121	0.102845	0.482886	Nynrin	protein_coding
ENSMUSG00000051319	535.648	-0.131624	0.0807264	-1.6305	0.102996	0.482886	Mtln	protein_coding
ENSMUSG00000089911	1295.61	-0.108288	0.066374	-1.63148	0.102788	0.482886	Mfsd14a	protein_coding
ENSMUSG00000045980	576.039	0.138842	0.0851503	1.63055	0.102985	0.482886	Tmem104	protein_coding
ENSMUSG00000028483	354.101	0.175142	0.107355	1.63142	0.102801	0.482886	Snapc3	protein_coding
ENSMUSG00000029229	383.043	-0.165941	0.101872	-1.62892	0.103331	0.48395	Chic2	protein_coding
ENSMUSG00000038437	1748.4	-0.128951	0.0791531	-1.62914	0.103284	0.48395	Mllt6	protein_coding
ENSMUSG00000028020	11062.8	-0.154328	0.0947712	-1.62843	0.103434	0.484183	Glrb	protein_coding
ENSMUSG00000031930	850.553	-0.112698	0.0692228	-1.62804	0.103516	0.484313	Wwp2	protein_coding
ENSMUSG00000023805	1260.65	0.156135	0.0959663	1.62698	0.103741	0.484358	Synj2	protein_coding
ENSMUSG00000027131	1079.33	-0.133408	0.0819881	-1.62717	0.103702	0.484358	Emc4	protein_coding
ENSMUSG00000039661	990.179	-0.103725	0.0637256	-1.62768	0.103594	0.484358	Dusp26	protein_coding
ENSMUSG00000020460	2053.91	-0.0997723	0.0613167	-1.62716	0.103702	0.484358	Rps27a	protein_coding
ENSMUSG00000033295	1782.89	-0.170453	0.10484	-1.62584	0.103983	0.484482	Ptprf	protein_coding
ENSMUSG00000021589	1595.85	-0.145594	0.0895379	-1.62606	0.103936	0.484482	Rhobtb3	protein_coding
ENSMUSG00000034586	1158.26	-0.0916849	0.0563816	-1.62615	0.103918	0.484482	Hid1	protein_coding
ENSMUSG00000024805	907.762	0.120419	0.0740651	1.62585	0.103981	0.484482	Pcgf5	protein_coding
ENSMUSG00000027397	2883.67	0.101839	0.0626505	1.6255	0.104055	0.484568	Slc20a1	protein_coding
ENSMUSG00000027341	383.372	-0.159255	0.0981138	-1.62317	0.104553	0.485462	Tmem230	protein_coding
ENSMUSG00000055320	720.641	-0.145115	0.08936	-1.62394	0.104389	0.485462	Tead1	protein_coding
ENSMUSG00000071074	742.252	-0.112172	0.0690958	-1.62342	0.104499	0.485462	Yipf3	protein_coding
ENSMUSG00000034820	1183.3	-0.105922	0.0652597	-1.62308	0.104572	0.485462	Cpsf7	protein_coding
ENSMUSG00000029674	3550.75	0.0955736	0.0588985	1.62268	0.104657	0.485462	Limk1	protein_coding
ENSMUSG00000025607	2066.28	0.0970084	0.0597865	1.62258	0.104679	0.485462	Copg2	protein_coding
ENSMUSG00000028465	1862.46	0.117392	0.0722732	1.62428	0.104317	0.485462	Tln1	protein_coding
ENSMUSG00000067736	750.17	0.13467	0.0829872	1.62278	0.104636	0.485462	Gm10222	unprocessed_pseudogene
ENSMUSG00000067879	932.662	0.174188	0.107449	1.62113	0.10499	0.485901	Vxn	protein_coding
ENSMUSG00000020570	2866.89	-0.357313	0.220395	-1.62124	0.104967	0.485901	Sypl1	protein_coding
ENSMUSG00000095098	437.266	-0.185307	0.114266	-1.62172	0.104864	0.485901	Ccdc85b	protein_coding
ENSMUSG00000021273	2189.08	-0.126079	0.0777505	-1.62159	0.104892	0.485901	Fdft1	protein_coding
ENSMUSG00000053716	801.259	0.107646	0.0664177	1.62074	0.105073	0.485901	Dusp7	protein_coding
ENSMUSG00000021470	562.359	0.15546	0.0959258	1.62063	0.105098	0.485901	Ercc6l2	protein_coding
ENSMUSG00000060923	1059.86	-0.172662	0.106566	-1.62023	0.105183	0.486047	Acyp2	protein_coding
ENSMUSG00000038916	1231.63	0.114662	0.0708093	1.61931	0.10538	0.486066	Mtcl3	protein_coding
ENSMUSG00000024095	1132.65	-0.116236	0.0717653	-1.61967	0.105304	0.486066	Hnrnpll	protein_coding
ENSMUSG00000040234	1323.98	-0.101115	0.0624475	-1.6192	0.105404	0.486066	Tm7sf3	protein_coding
ENSMUSG00000045098	907.047	0.110513	0.0682274	1.61977	0.105281	0.486066	Kmt5b	protein_coding
ENSMUSG00000044768	900.542	-0.12407	0.0766937	-1.61774	0.105719	0.487076	Macir	protein_coding
ENSMUSG00000049957	375.339	0.147041	0.0908958	1.61768	0.105731	0.487076	Ccdc137	protein_coding
ENSMUSG00000031360	773.27	0.114033	0.0705352	1.61668	0.105948	0.487827	Ctps2	protein_coding
ENSMUSG00000026153	687.205	0.156039	0.0966158	1.61505	0.1063	0.489198	Fam135a	protein_coding
ENSMUSG00000045201	367.631	-0.198282	0.122805	-1.61461	0.106395	0.489386	Lrrc3b	protein_coding
ENSMUSG00000039883	840.213	-0.171155	0.106042	-1.61403	0.106522	0.489511	Lrrc17	protein_coding
ENSMUSG00000032802	2149.06	-0.0920672	0.0570435	-1.61398	0.106531	0.489511	Srxn1	protein_coding
ENSMUSG00000038738	2150.91	-0.107206	0.0664518	-1.61329	0.106682	0.489627	Shank1	protein_coding
ENSMUSG00000015247	344.229	-0.216041	0.133928	-1.61311	0.10672	0.489627	Nipsnap3b	protein_coding
ENSMUSG00000040111	3529.05	0.078727	0.0487901	1.61359	0.106617	0.489627	Gramd1b	protein_coding
ENSMUSG00000030861	1873.33	0.0885407	0.0548994	1.61278	0.106792	0.489656	Acadsb	protein_coding
ENSMUSG00000029729	1380.75	0.178354	0.110601	1.61258	0.106835	0.489656	Zkscan1	protein_coding
ENSMUSG00000027550	549.511	0.226323	0.140375	1.61227	0.106903	0.489718	Lrrcc1	protein_coding
ENSMUSG00000038765	396.468	-0.153889	0.0954924	-1.61153	0.107064	0.490189	Lmx1b	protein_coding
ENSMUSG00000046032	828.332	-0.137373	0.0852558	-1.6113	0.107115	0.490189	Snx12	protein_coding
ENSMUSG00000014402	1416.07	-0.115526	0.0717455	-1.61022	0.107351	0.49052	Tsg101	protein_coding
ENSMUSG00000039704	2915.5	-0.103011	0.0639552	-1.61067	0.107252	0.49052	Lmbrd2	protein_coding
ENSMUSG00000040591	1353.88	-0.0942406	0.0585251	-1.61026	0.107341	0.49052	Cstpp1	protein_coding
ENSMUSG00000038079	460.221	-0.124389	0.0772758	-1.60968	0.107469	0.490809	Tmem237	protein_coding
ENSMUSG00000053825	677.449	0.191995	0.119335	1.60888	0.107643	0.490931	Ppfia2	protein_coding
ENSMUSG00000030757	276.773	0.217464	0.135171	1.60881	0.107659	0.490931	Zkscan2	protein_coding
ENSMUSG00000027628	612.124	-0.12227	0.075996	-1.6089	0.107638	0.490931	Aar2	protein_coding
ENSMUSG00000032557	763.484	0.16034	0.0997011	1.60821	0.10779	0.49128	Uba5	protein_coding
ENSMUSG00000045034	1892.72	-0.109181	0.0679046	-1.60786	0.107866	0.491378	Ankrd34b	protein_coding
ENSMUSG00000039982	814.493	-0.10892	0.0677592	-1.60746	0.107953	0.491525	Dtx4	protein_coding
ENSMUSG00000038495	2471.16	-0.210285	0.131014	-1.60505	0.108482	0.492481	Otud7b	protein_coding
ENSMUSG00000053907	4884.64	-0.113623	0.0707567	-1.60583	0.108312	0.492481	Mat2a	protein_coding
ENSMUSG00000039849	695.48	-0.108218	0.0674204	-1.60513	0.108466	0.492481	Pcif1	protein_coding
ENSMUSG00000031751	3786.77	-0.101965	0.0635292	-1.60501	0.108491	0.492481	Amfr	protein_coding
ENSMUSG00000059248	975.625	0.125344	0.0780824	1.60528	0.108433	0.492481	Septin9	protein_coding
ENSMUSG00000022797	1776.18	0.148581	0.092514	1.60604	0.108265	0.492481	Tfrc	protein_coding
ENSMUSG00000029772	5066.74	-0.0653916	0.0407577	-1.6044	0.108626	0.492845	Ahcyl2	protein_coding
ENSMUSG00000025232	807.133	-0.155661	0.0970781	-1.60346	0.108832	0.493365	Hexa	protein_coding
ENSMUSG00000022340	1336.32	-0.138395	0.08633	-1.6031	0.108913	0.493365	Sybu	protein_coding
ENSMUSG00000069744	516.861	0.124017	0.0773711	1.60288	0.10896	0.493365	Psmb3	protein_coding
ENSMUSG00000022110	2734.46	0.176218	0.109937	1.60291	0.108955	0.493365	Sucla2	protein_coding
ENSMUSG00000046994	502.653	-0.212694	0.132728	-1.60248	0.109049	0.493396	Mars2	protein_coding	mitochondrion
ENSMUSG00000031201	643.054	0.161059	0.100529	1.60211	0.109132	0.493396	Brcc3	protein_coding
ENSMUSG00000021775	1967.04	0.177289	0.110657	1.60215	0.109123	0.493396	Nr1d2	protein_coding
ENSMUSG00000026058	278.54	-0.249655	0.15598	-1.60056	0.109475	0.494331	Khdrbs2	protein_coding
ENSMUSG00000039697	2693.72	0.103446	0.0646413	1.6003	0.109532	0.494331	Ncoa7	protein_coding
ENSMUSG00000001151	526.44	0.159328	0.0995287	1.60083	0.109415	0.494331	Pcnt	protein_coding
ENSMUSG00000035151	470.269	0.164343	0.102703	1.60018	0.109558	0.494331	Elmod2	protein_coding
ENSMUSG00000110080	371.478	0.195182	0.122046	1.59925	0.109765	0.494368	Gm6145	lncRNA
ENSMUSG00000002997	1243.14	-0.137452	0.0859441	-1.59932	0.109751	0.494368	Prkar2b	protein_coding
ENSMUSG00000024501	2751.78	-0.103525	0.0647345	-1.59922	0.109772	0.494368	Dpysl3	protein_coding
ENSMUSG00000072704	3822.89	-0.100735	0.0630078	-1.59878	0.10987	0.494368	Smim10l1	protein_coding
ENSMUSG00000030105	6163.03	-0.0748829	0.046841	-1.59866	0.109896	0.494368	Arl8b	protein_coding
[truncated: 15,460 more rows]

## Sheet: TA P525L
Tibialis anterior hFUS/hFUSP525L vs hFUS/hFUS	baseMean	log2FoldChange	lfcSE	stat	pvalue	padj	Gene_name_conversion	Gene type	mitochondrion (GO:0005739)
ENSMUSG00000092341	9066.88	1.10348	0.0940344	11.7348	8.44872e-32	8.35832e-28	Malat1	lncRNA
ENSMUSG00000138178	782.041	0.703874	0.0804503	8.74918	2.14915e-18	1.06308e-14	ENSMUSG00000138178	lncRNA
ENSMUSG00000074622	888.519	-0.927641	0.106691	-8.69466	3.47866e-18	1.14715e-14	Mafb	protein_coding
ENSMUSG00000066595	259.587	-1.07159	0.1556	-6.88679	5.70651e-12	1.41136e-08	Flvcr1	protein_coding	mitochondrion
ENSMUSG00000020349	2521.87	-0.433199	0.0653156	-6.63239	3.30284e-11	6.53501e-08	Ppp2ca	protein_coding
ENSMUSG00000061232	643.849	0.544676	0.0903405	6.02915	1.64828e-09	2.71774e-06	H2-K1	protein_coding
ENSMUSG00000100862	10705.9	-0.453005	0.0759839	-5.96186	2.49384e-09	3.4769e-06	Atp6-ps	unprocessed_pseudogene
ENSMUSG00000067818	624.013	0.57708	0.097115	5.94224	2.81161e-09	3.4769e-06	Myl9	protein_coding
ENSMUSG00000092274	1739.14	0.730157	0.123566	5.90906	3.44068e-09	3.78208e-06	Neat1	lncRNA
ENSMUSG00000101111	8245.3	-0.419226	0.0729027	-5.75049	8.89849e-09	8.80328e-06	Gm28437	unprocessed_pseudogene
ENSMUSG00000044378	60.6271	-1.97232	0.352305	-5.59835	2.16402e-08	1.78406e-05	Slc15a5	protein_coding
ENSMUSG00000021268	89.4533	1.11693	0.19946	5.59979	2.14613e-08	1.78406e-05	Meg3	lncRNA
ENSMUSG00000026305	1522.15	0.497249	0.0906585	5.48486	4.13801e-08	3.14903e-05	Lrrfip1	protein_coding
ENSMUSG00000060802	2384.07	0.520377	0.0974401	5.34048	9.26989e-08	6.5505e-05	B2m	protein_coding
ENSMUSG00000022357	429.898	-0.740544	0.139205	-5.3198	1.03879e-07	6.85119e-05	Klhl38	protein_coding
ENSMUSG00000024259	1327.62	-0.317124	0.0627418	-5.05443	4.31678e-07	0.000237255	Slc25a46	protein_coding	mitochondrion
ENSMUSG00000033610	410.65	-0.663692	0.131203	-5.05851	4.22556e-07	0.000237255	Pank1	protein_coding
ENSMUSG00000074505	113.598	-1.18409	0.233758	-5.06547	4.07389e-07	0.000237255	Fat3	protein_coding
ENSMUSG00000041695	1653.42	-0.643985	0.128928	-4.99491	5.8863e-07	0.00030649	Kcnj2	protein_coding
ENSMUSG00000028033	616.292	-0.776712	0.15675	-4.95509	7.22955e-07	0.000357609	Kcnq5	protein_coding
ENSMUSG00000064341	910844	-0.642207	0.130867	-4.90733	9.23255e-07	0.000434941	mt-Nd1	protein_coding	mitochondrion
ENSMUSG00000042444	1124.66	-0.331728	0.0696263	-4.7644	1.89419e-06	0.000791005	Mindy2	protein_coding
ENSMUSG00000019841	856.198	0.516954	0.108543	4.76265	1.91066e-06	0.000791005	Rev3l	protein_coding
ENSMUSG00000019787	22284.5	0.873737	0.18349	4.76178	1.91894e-06	0.000791005	Trdn	protein_coding
ENSMUSG00000073411	718.63	0.433506	0.0915922	4.733	2.2123e-06	0.000875451	H2-D1	protein_coding
ENSMUSG00000032193	330.646	-0.818207	0.174023	-4.70172	2.57979e-06	0.00098161	Ldlr	protein_coding
ENSMUSG00000051980	195.394	-1.01824	0.218347	-4.66338	3.11058e-06	0.00113974	Casr	protein_coding
ENSMUSG00000021536	1020.1	-0.373935	0.0805083	-4.64467	3.40623e-06	0.00116687	Adcy2	protein_coding
ENSMUSG00000040297	287.516	0.463367	0.0997818	4.6438	3.42053e-06	0.00116687	Suco	protein_coding
ENSMUSG00000024456	1954.1	-0.383485	0.0842344	-4.55259	5.29883e-06	0.00174738	Diaph1	protein_coding
ENSMUSG00000018830	587.149	0.830136	0.182943	4.53767	5.68788e-06	0.00181517	Myh11	protein_coding
ENSMUSG00000000184	267.581	0.537916	0.120507	4.46376	8.0532e-06	0.0024897	Ccnd2	protein_coding
ENSMUSG00000050777	145.067	-0.779457	0.175919	-4.43078	9.38932e-06	0.0028148	Tmem37	protein_coding
ENSMUSG00000033871	161.921	-0.682637	0.155207	-4.39823	1.0914e-05	0.00317565	Ppargc1b	protein_coding	mitochondrion
ENSMUSG00000033004	939.521	0.368194	0.0838372	4.39177	1.12433e-05	0.00317801	Mycbp2	protein_coding
ENSMUSG00000020715	306.221	-0.555963	0.128026	-4.34259	1.4081e-05	0.00386953	Ern1	protein_coding	mitochondrion
ENSMUSG00000053279	2657.94	-0.512633	0.120007	-4.27171	1.93984e-05	0.0051867	Aldh1a1	protein_coding
ENSMUSG00000105096	64.1538	-1.09082	0.256334	-4.25545	2.08633e-05	0.0054316	Gbp10	protein_coding
ENSMUSG00000020580	3439.12	0.420044	0.0991085	4.23822	2.25297e-05	0.00571503	Rock2	protein_coding
ENSMUSG00000082884	224.104	-0.511338	0.12089	-4.22979	2.33912e-05	0.00578524	Gm13339	transcribed_unprocessed_pseudogene
ENSMUSG00000029771	148.932	-1.2155	0.290039	-4.1908	2.77976e-05	0.00670737	Irf5	protein_coding
ENSMUSG00000087090	987.408	0.508727	0.122352	4.1579	3.21191e-05	0.00756557	Nctc1	lncRNA
ENSMUSG00000062373	4425.55	-0.47885	0.115838	-4.13377	3.56853e-05	0.00802351	Tmem65	protein_coding	mitochondrion
ENSMUSG00000043336	871.333	0.709621	0.171577	4.13587	3.53606e-05	0.00802351	Filip1l	protein_coding
ENSMUSG00000022124	1492.96	-0.245293	0.0596051	-4.1153	3.8667e-05	0.00850073	Fbxl3	protein_coding
ENSMUSG00000029361	4280.15	-0.351006	0.0858688	-4.08771	4.35658e-05	0.00893661	Nos1	protein_coding	mitochondrion
ENSMUSG00000102070	6784.96	-0.276012	0.0673844	-4.09608	4.20214e-05	0.00893661	Gm28661	unprocessed_pseudogene
ENSMUSG00000039103	4412.24	0.611119	0.149583	4.0855	4.39823e-05	0.00893661	Nexn	protein_coding
ENSMUSG00000036879	9282.42	0.407323	0.0997358	4.08402	4.4263e-05	0.00893661	Phkb	protein_coding
ENSMUSG00000006262	1449.83	-0.334791	0.0821489	-4.07542	4.59311e-05	0.00908792	Mob1b	protein_coding
ENSMUSG00000032330	3178.6	-0.244435	0.0601307	-4.06505	4.80216e-05	0.00931525	Cox7a2	protein_coding	mitochondrion
ENSMUSG00000062078	8349.32	-0.34438	0.085419	-4.03165	5.5386e-05	0.0103384	Qki	protein_coding
ENSMUSG00000039242	1651.36	0.240947	0.0597636	4.03166	5.5384e-05	0.0103384	B3galnt2	protein_coding
ENSMUSG00000097451	317.467	0.937234	0.233015	4.0222	5.76559e-05	0.0105628	Rian	lncRNA
ENSMUSG00000029580	2835.8	0.463856	0.115452	4.01774	5.87601e-05	0.0105693	Actb	protein_coding
ENSMUSG00000058975	1855.37	-0.454746	0.113358	-4.01158	6.03143e-05	0.0106552	Kcnc1	protein_coding
ENSMUSG00000042010	4726.1	-0.301364	0.07556	-3.98841	6.6519e-05	0.0111498	Acacb	protein_coding	mitochondrion
ENSMUSG00000021140	2202.07	-0.310988	0.0780789	-3.983	6.80508e-05	0.0111498	Pcnx1	protein_coding
ENSMUSG00000101609	110.319	1.01012	0.253224	3.98904	6.6341e-05	0.0111498	Kcnq1ot1	lncRNA
ENSMUSG00000028268	63.7518	1.2411	0.310811	3.99309	6.52176e-05	0.0111498	Gbp3	protein_coding
ENSMUSG00000026421	376.204	0.520458	0.130749	3.98057	6.87495e-05	0.0111498	Csrp1	protein_coding
ENSMUSG00000056692	2999.51	-0.167633	0.0424662	-3.94744	7.8992e-05	0.0122104	Ilrun	protein_coding
ENSMUSG00000083863	4462.23	-0.293397	0.0742121	-3.9535	7.70166e-05	0.0122104	Gm13341	unprocessed_pseudogene
ENSMUSG00000021477	1450.16	0.368062	0.0932286	3.94796	7.88214e-05	0.0122104	Ctsl	protein_coding
ENSMUSG00000002265	723.278	0.630029	0.160395	3.92798	8.56612e-05	0.0130376	Peg3	protein_coding
ENSMUSG00000025993	496.227	-0.464979	0.118635	-3.91941	8.87669e-05	0.013107	Slc40a1	protein_coding
ENSMUSG00000022443	931.404	0.32652	0.0832345	3.92289	8.74916e-05	0.013107	Myh9	protein_coding
ENSMUSG00000026489	6899.7	-0.53236	0.136164	-3.9097	9.24121e-05	0.0132497	Coq8a	protein_coding	mitochondrion
ENSMUSG00000034243	500.615	0.710768	0.181636	3.91314	9.11034e-05	0.0132497	Golgb1	protein_coding
ENSMUSG00000023805	716.435	-0.597941	0.153258	-3.90154	9.55842e-05	0.0133494	Synj2	protein_coding
ENSMUSG00000022847	63.6337	-1.22232	0.313338	-3.90098	9.58059e-05	0.0133494	Thpo	protein_coding
ENSMUSG00000026103	1807.6	-0.306743	0.0792864	-3.8688	0.000109374	0.0150283	Gls	protein_coding	mitochondrion
ENSMUSG00000005299	1163.63	-0.32294	0.0836314	-3.86146	0.000112711	0.0152746	Letm1	protein_coding	mitochondrion
ENSMUSG00000030616	160.333	0.990131	0.256838	3.85508	0.000115692	0.0153829	Sytl2	protein_coding
ENSMUSG00000041571	7151.56	0.249041	0.0646336	3.85313	0.000116619	0.0153829	Selenow	protein_coding
ENSMUSG00000022092	501.676	-0.377106	0.0980408	-3.84642	0.000119856	0.0156018	Ppp3cc	protein_coding	mitochondrion
ENSMUSG00000027099	507.615	-0.504885	0.131742	-3.83236	0.000126919	0.0163066	Mtx2	protein_coding	mitochondrion
ENSMUSG00000090942	831.312	2.01366	0.527458	3.81768	0.000134715	0.0170863	F830016B08Rik	protein_coding
ENSMUSG00000031382	1310.75	-0.266308	0.0698664	-3.81167	0.000138029	0.017154	Asb11	protein_coding
ENSMUSG00000041329	4584.68	0.405492	0.106416	3.81045	0.000138716	0.017154	Atp1b2	protein_coding
ENSMUSG00000040407	1189.12	0.867288	0.228288	3.7991	0.00014522	0.0177365	Akap9	protein_coding
ENSMUSG00000035649	296.63	0.412733	0.108822	3.79273	0.000149002	0.0179766	Zcchc7	protein_coding
ENSMUSG00000017485	992.058	0.313524	0.0828616	3.7837	0.000154513	0.0184168	Top2b	protein_coding
ENSMUSG00000048486	2022.12	-0.210008	0.0561047	-3.74315	0.000181725	0.0185341	Fitm2	protein_coding	mitochondrion
ENSMUSG00000022707	1525	-0.405032	0.107467	-3.7689	0.000163966	0.0185341	Gbe1	protein_coding
ENSMUSG00000078486	3516.49	-0.479715	0.127989	-3.74809	0.000178186	0.0185341	Perm1	protein_coding
ENSMUSG00000027313	499.433	-0.910221	0.242981	-3.74606	0.000179631	0.0185341	Chac1	protein_coding
ENSMUSG00000035173	698.351	0.491425	0.131141	3.74729	0.000178752	0.0185341	Ccdc186	protein_coding
ENSMUSG00000067851	2740.18	0.282215	0.0753448	3.74565	0.000179926	0.0185341	Arfgef1	protein_coding
ENSMUSG00000056342	1904.49	0.32084	0.0856123	3.7476	0.000178538	0.0185341	Usp34	protein_coding
ENSMUSG00000045962	7642.38	0.341337	0.090838	3.75765	0.000171518	0.0185341	Wnk1	protein_coding
ENSMUSG00000079037	1777.17	0.212476	0.0566351	3.75166	0.000175669	0.0185341	Prnp	protein_coding
ENSMUSG00000054034	134.208	0.710984	0.188467	3.77245	0.00016165	0.0185341	Tceal5	protein_coding
ENSMUSG00000000305	102.002	1.24219	0.331451	3.74772	0.000178446	0.0185341	Cdh4	protein_coding
ENSMUSG00000021493	2337.14	0.257572	0.0686745	3.75063	0.000176393	0.0185341	Pdlim7	protein_coding
ENSMUSG00000035783	1076.48	0.69291	0.184469	3.75623	0.000172489	0.0185341	Acta2	protein_coding
ENSMUSG00000017344	251.366	0.434992	0.116042	3.74858	0.000177841	0.0185341	Vtn	protein_coding
ENSMUSG00000049313	2220.09	0.332517	0.0891212	3.73106	0.000190672	0.0192481	Sorl1	protein_coding
ENSMUSG00000028649	1557.35	0.614097	0.165072	3.72019	0.000199076	0.0198935	Macf1	protein_coding
ENSMUSG00000025190	7227.05	-0.378596	0.101998	-3.71181	0.000205785	0.0202624	Got1	protein_coding
ENSMUSG00000028559	1261.1	0.371383	0.10009	3.71048	0.000206864	0.0202624	Osbpl9	protein_coding
ENSMUSG00000038764	1520.98	-0.591672	0.159683	-3.70529	0.000211147	0.0203538	Ptpn3	protein_coding
ENSMUSG00000030795	297.323	0.571072	0.154161	3.70438	0.000211911	0.0203538	Fus	protein_coding
ENSMUSG00000071637	216.7	-0.980501	0.265235	-3.69673	0.000218394	0.0206592	Cebpd	protein_coding
ENSMUSG00000027742	2108.38	-0.22204	0.0600805	-3.69572	0.000219268	0.0206592	Cog6	protein_coding
ENSMUSG00000025790	467.96	-0.485718	0.132302	-3.6713	0.000241323	0.0225227	Slco3a1	protein_coding
ENSMUSG00000051495	539.622	-0.37689	0.102994	-3.65934	0.00025287	0.0231633	Irf2bp2	protein_coding
ENSMUSG00000040666	6440.04	0.305259	0.0834133	3.6596	0.000252614	0.0231633	Sh3bgr	protein_coding
ENSMUSG00000021622	18685.6	-0.463612	0.126805	-3.6561	0.000256082	0.0232424	Ckmt2	protein_coding	mitochondrion
ENSMUSG00000049550	7408.72	0.503911	0.138206	3.64609	0.000266258	0.0239463	Clip1	protein_coding
ENSMUSG00000006010	587.557	0.311172	0.0856947	3.63118	0.000282134	0.0251455	Odr4	protein_coding
ENSMUSG00000032253	707.387	0.25795	0.0711659	3.62463	0.000289375	0.0255606	Phip	protein_coding
ENSMUSG00000042148	716.99	-0.354381	0.0978887	-3.62024	0.00029433	0.0257682	Cox10	protein_coding	mitochondrion
ENSMUSG00000015749	1505.58	0.308595	0.0853666	3.61493	0.000300424	0.0258481	Anp32e	protein_coding
ENSMUSG00000102976	211.152	0.567323	0.15694	3.6149	0.000300469	0.0258481	Zc3h11a	protein_coding
ENSMUSG00000005610	15519.9	0.207763	0.0577348	3.59857	0.000319975	0.0272889	Eif4g2	protein_coding
ENSMUSG00000040990	1183.76	-0.291264	0.0811069	-3.59111	0.000329267	0.0278414	Sh3kbp1	protein_coding
ENSMUSG00000038349	246.533	-0.567615	0.158212	-3.58768	0.000333628	0.0279711	Plcl1	protein_coding
ENSMUSG00000041415	1143.35	0.269752	0.0752802	3.5833	0.000339277	0.0282056	Dicer1	protein_coding
ENSMUSG00000031601	1363.95	-0.28644	0.0800786	-3.57698	0.000347585	0.0286555	Cnot7	protein_coding
ENSMUSG00000001891	18692.8	-0.348125	0.0974359	-3.57286	0.000353103	0.0288698	Ugp2	protein_coding
ENSMUSG00000097119	227.216	0.446866	0.125331	3.5655	0.000363168	0.0289839	B230354K17Rik	lncRNA
ENSMUSG00000024493	513.809	0.33143	0.0930048	3.56358	0.00036583	0.0289839	Lars1	protein_coding
ENSMUSG00000032301	1217.72	0.275869	0.0774196	3.5633	0.000366218	0.0289839	Psma4	protein_coding
ENSMUSG00000054404	607.563	0.503203	0.141142	3.56522	0.000363552	0.0289839	Slfn5	protein_coding
ENSMUSG00000038126	100.205	0.606206	0.170343	3.55873	0.000372646	0.0291648	Mphosph9	protein_coding
ENSMUSG00000042451	754.135	1.60634	0.451535	3.5575	0.000374399	0.0291648	Mybph	protein_coding
ENSMUSG00000002808	2444.03	-0.287536	0.0813231	-3.53572	0.000406665	0.0312612	Epdr1	protein_coding
ENSMUSG00000074634	275.646	-0.449743	0.127296	-3.53305	0.000410791	0.0312612	Tmem267	protein_coding
ENSMUSG00000047419	57316.8	0.305585	0.0864438	3.53507	0.000407661	0.0312612	Cmya5	protein_coding
ENSMUSG00000064371	743.228	-0.588763	0.166784	-3.53009	0.00041542	0.0313721	mt-Tt	Mt_tRNA	mitochondrion
ENSMUSG00000024991	2094.27	0.456357	0.129423	3.5261	0.000421723	0.0316069	Eif3a	protein_coding
ENSMUSG00000000168	4280.98	-0.260591	0.0741486	-3.51445	0.000440672	0.0321202	Dlat	protein_coding	mitochondrion
ENSMUSG00000034040	133.882	-0.585056	0.166475	-3.51438	0.000440779	0.0321202	Galnt17	protein_coding
ENSMUSG00000014195	940.02	0.327623	0.0931423	3.51745	0.00043572	0.0321202	Dnajc7	protein_coding
ENSMUSG00000058135	2715.13	0.273938	0.0779667	3.51353	0.000442202	0.0321202	Gstm1	protein_coding
ENSMUSG00000020546	503.573	0.405777	0.115541	3.51197	0.000444806	0.0321202	Stxbp4	protein_coding
ENSMUSG00000060376	995.672	-0.276204	0.0786962	-3.50975	0.000448528	0.0321543	Bckdha	protein_coding
ENSMUSG00000055296	1078.33	-0.273794	0.0780813	-3.50653	0.000453994	0.032312	Tmem245	protein_coding
ENSMUSG00000006418	736.623	-0.348198	0.0994326	-3.50185	0.000462041	0.0326498	Rnf114	protein_coding
ENSMUSG00000038462	7408.39	-0.346926	0.0994923	-3.48696	0.000488539	0.0342774	Uqcrfs1	protein_coding	mitochondrion
ENSMUSG00000060679	568.091	-0.357847	0.102948	-3.47599	0.000508967	0.0354592	Mrps9	protein_coding	mitochondrion
ENSMUSG00000064345	695118	-0.384182	0.110631	-3.47263	0.000515379	0.035473	mt-Nd2	protein_coding	mitochondrion
ENSMUSG00000027698	471.738	-0.54009	0.15577	-3.46724	0.000525841	0.035473	Nceh1	protein_coding
ENSMUSG00000025887	371.429	-0.522489	0.150692	-3.46726	0.000525798	0.035473	Casp12	protein_coding
ENSMUSG00000029992	1569.14	0.206145	0.0594124	3.46973	0.000520974	0.035473	Gfpt1	protein_coding
ENSMUSG00000136412	129.994	0.633077	0.182622	3.4666	0.000527093	0.035473	ENSMUSG00000136412	lncRNA
ENSMUSG00000022016	634.716	0.416286	0.120249	3.46188	0.000536411	0.0358562	Akap11	protein_coding
ENSMUSG00000045374	103.606	-0.542484	0.157253	-3.44976	0.000561088	0.037254	Wdr81	protein_coding	mitochondrion
ENSMUSG00000014846	453.375	0.597898	0.173481	3.44647	0.000567952	0.0374583	Tppp3	protein_coding
ENSMUSG00000026135	182.31	-0.471383	0.13703	-3.44001	0.0005817	0.0380556	Zfp142	protein_coding
ENSMUSG00000036333	756.339	0.270773	0.0787447	3.43861	0.000584701	0.0380556	Kidins220	protein_coding
ENSMUSG00000024290	424.53	0.436739	0.127158	3.4346	0.000593418	0.0381213	Rock1	protein_coding
ENSMUSG00000030123	561.129	0.378852	0.110286	3.43519	0.00059213	0.0381213	Plxnd1	protein_coding
ENSMUSG00000035992	2431.06	-0.320601	0.0935044	-3.42873	0.000606413	0.0382588	Fnip1	protein_coding
ENSMUSG00000021945	767.885	0.413407	0.120481	3.43131	0.000600671	0.0382588	Zmym2	protein_coding
ENSMUSG00000068614	3615.55	1.13817	0.331983	3.4284	0.00060716	0.0382588	Actc1	protein_coding
ENSMUSG00000028383	1393.66	-0.302361	0.0883855	-3.42094	0.000624057	0.0389884	Hsdl2	protein_coding	mitochondrion
ENSMUSG00000027750	162.723	0.688042	0.201192	3.41982	0.00062662	0.0389884	Postn	protein_coding
ENSMUSG00000021843	4122.45	0.472044	0.138605	3.40568	0.000660005	0.0407722	Ktn1	protein_coding
ENSMUSG00000022361	778.607	0.451913	0.132817	3.40253	0.000667654	0.0407722	Zhx1	protein_coding
ENSMUSG00000007655	3314.23	0.371207	0.109065	3.40353	0.00066522	0.0407722	Cav1	protein_coding
ENSMUSG00000018428	1492.22	-0.332472	0.0977763	-3.40033	0.000673046	0.0408494	Akap1	protein_coding	mitochondrion
ENSMUSG00000078671	622.901	0.343338	0.101123	3.39526	0.00068563	0.0413019	Chd2	protein_coding
ENSMUSG00000042249	129.596	0.70044	0.206377	3.39398	0.000688853	0.0413019	Grk3	protein_coding
ENSMUSG00000022637	441.53	-0.344469	0.101582	-3.39106	0.00069623	0.0414928	Cblb	protein_coding
ENSMUSG00000022836	465.452	0.488305	0.144133	3.38788	0.000704349	0.0417253	Mylk	protein_coding
ENSMUSG00000029309	1941.29	0.402643	0.118964	3.38459	0.000712846	0.0419773	Sparcl1	protein_coding
ENSMUSG00000034158	1134.6	-0.364969	0.10802	-3.37873	0.000728217	0.0421301	Lrrc58	protein_coding
ENSMUSG00000035958	151.55	-0.447341	0.132399	-3.37873	0.00072821	0.0421301	Tdp2	protein_coding
ENSMUSG00000030655	985.99	0.357157	0.105697	3.37905	0.00072736	0.0421301	Smg1	protein_coding
ENSMUSG00000036570	4071.09	0.190247	0.0564001	3.37317	0.000743091	0.0427407	Fxyd1	protein_coding
ENSMUSG00000003865	5985.15	-0.248391	0.0737371	-3.36859	0.000755526	0.0432047	Gys1	protein_coding
ENSMUSG00000021068	430.492	0.474849	0.141213	3.36264	0.000772013	0.0438938	Nin	protein_coding
ENSMUSG00000034910	571.857	-0.431709	0.12845	-3.36091	0.00077687	0.0439175	Pygo1	protein_coding
ENSMUSG00000037149	1492.33	0.364288	0.108448	3.35912	0.000781917	0.0439517	Ddx1	protein_coding
ENSMUSG00000046994	196.433	-0.544882	0.162535	-3.35241	0.000801115	0.0447765	Mars2	protein_coding	mitochondrion
ENSMUSG00000022914	644	0.476437	0.142184	3.35084	0.000805662	0.0447776	Brwd1	protein_coding
ENSMUSG00000025525	678.358	-0.311838	0.0931747	-3.34681	0.000817474	0.0451803	Apool	protein_coding	mitochondrion
ENSMUSG00000039601	1048.91	-0.490617	0.146758	-3.34304	0.000828653	0.0455437	Rcan2	protein_coding
ENSMUSG00000040740	118.382	-0.714128	0.213768	-3.34066	0.000835784	0.0456818	Slc25a34	protein_coding	mitochondrion
ENSMUSG00000038663	5292.24	0.380667	0.114101	3.33622	0.000849267	0.0461637	Fsd2	protein_coding
ENSMUSG00000021759	559.753	-0.305136	0.0915876	-3.33163	0.000863396	0.0464216	Plpp1	protein_coding
ENSMUSG00000031328	1180.14	0.484646	0.145437	3.33235	0.000861157	0.0464216	Flna	protein_coding
ENSMUSG00000028964	4434.8	0.26135	0.0785256	3.32822	0.000874039	0.0467398	Park7	protein_coding
ENSMUSG00000021690	1331.42	-0.235877	0.0709836	-3.32299	0.000890595	0.0473691	Jmy	protein_coding
ENSMUSG00000064358	237.29	-0.42466	0.128186	-3.31285	0.000923519	0.0485355	mt-Co3	protein_coding	mitochondrion
ENSMUSG00000006998	3155.56	0.166422	0.0502681	3.31069	0.000930667	0.0485355	Psmd2	protein_coding
ENSMUSG00000026516	303.351	-0.344944	0.104111	-3.31324	0.000922216	0.0485355	Nvl	protein_coding
ENSMUSG00000021178	1705.88	0.197588	0.0596899	3.31024	0.000932148	0.0485355	Psmc1	protein_coding
ENSMUSG00000004789	4151.64	-0.206757	0.0625027	-3.30797	0.000939738	0.0486745	Dlst	protein_coding	mitochondrion
ENSMUSG00000043683	5092.57	-0.306126	0.0925949	-3.30608	0.000946104	0.048749	Fem1a	protein_coding	mitochondrion
ENSMUSG00000026131	11413.9	0.483725	0.146491	3.30207	0.000959745	0.0491956	Dst	protein_coding
ENSMUSG00000002102	2683.18	0.232702	0.0705813	3.29694	0.00097743	0.0495883	Psmc3	protein_coding
ENSMUSG00000023904	848.229	0.224542	0.0680782	3.2983	0.000972715	0.0495883	Hcfc1r1	protein_coding
ENSMUSG00000021371	1208.63	-0.220887	0.0670977	-3.29203	0.000994685	0.0502062	Mcur1	protein_coding	mitochondrion
ENSMUSG00000085022	121.028	-0.495148	0.150487	-3.29029	0.00100084	0.0502438	Gm5860	lncRNA
ENSMUSG00000031683	513.619	0.337156	0.102512	3.28896	0.00100559	0.0502438	Lsm6	protein_coding
ENSMUSG00000083563	10782	-0.264443	0.0805434	-3.28323	0.00102625	0.0507633	Gm13340	unprocessed_pseudogene
ENSMUSG00000032085	485.493	0.719068	0.218969	3.28387	0.00102391	0.0507633	Tagln	protein_coding
ENSMUSG00000022237	1518.47	-0.381701	0.116308	-3.28181	0.00103143	0.0507657	Ankrd33b	protein_coding
ENSMUSG00000030788	453.04	0.307735	0.0938534	3.27889	0.00104215	0.0509668	Rnf141	protein_coding
ENSMUSG00000085348	1260.07	0.451251	0.137665	3.2779	0.00104582	0.0509668	Myhas	lncRNA
ENSMUSG00000036752	1172.76	0.330956	0.101028	3.27587	0.00105337	0.0510831	Tubb4b	protein_coding
ENSMUSG00000038612	2334.8	-0.185302	0.0566023	-3.27376	0.00106127	0.0512152	Mcl1	protein_coding	mitochondrion
ENSMUSG00000090862	961.538	0.223043	0.0682326	3.26886	0.00107982	0.0518574	Rps13	protein_coding
ENSMUSG00000028150	1214.51	-0.315333	0.0965919	-3.26459	0.00109622	0.0522989	Rorc	protein_coding
ENSMUSG00000027680	6898.02	0.255276	0.0782163	3.26372	0.00109958	0.0522989	Fxr1	protein_coding
ENSMUSG00000040253	235.806	0.602165	0.185239	3.25074	0.00115104	0.0544845	Gbp7	protein_coding
ENSMUSG00000018796	4878.97	-0.306098	0.0944501	-3.24085	0.00119176	0.0561431	Acsl1	protein_coding	mitochondrion
ENSMUSG00000000563	7804.31	-0.211526	0.0653502	-3.2368	0.00120876	0.056407	Atp5pb	protein_coding	mitochondrion
ENSMUSG00000030433	724.096	-0.660343	0.20401	-3.23681	0.00120873	0.056407	Sbk2	protein_coding
ENSMUSG00000138098	82.8214	-1.66019	0.513214	-3.23489	0.00121692	0.0564414	ENSMUSG00000138098	lncRNA
ENSMUSG00000032399	7967.9	0.243868	0.0754086	3.23395	0.00122091	0.0564414	Rpl4	protein_coding
ENSMUSG00000064357	358.856	-0.449452	0.13919	-3.22906	0.00124199	0.0571488	mt-Atp6	protein_coding	mitochondrion
ENSMUSG00000042284	631.041	0.398885	0.123772	3.22274	0.00126969	0.0581532	Itga1	protein_coding
ENSMUSG00000069520	240.975	-0.354468	0.110042	-3.22122	0.00127647	0.058194	Tmem19	protein_coding
ENSMUSG00000054072	147.646	1.06275	0.330657	3.21407	0.00130868	0.0591179	Iigp1	protein_coding
ENSMUSG00000104453	1778.97	0.443444	0.137966	3.21415	0.0013083	0.0591179	Gm37829	TEC
ENSMUSG00000034449	242.39	-0.375934	0.11703	-3.2123	0.00131679	0.0592135	Dhrs11	protein_coding
ENSMUSG00000050812	6189.28	0.286719	0.089379	3.2079	0.0013371	0.0598549	Ecpas	protein_coding
ENSMUSG00000110834	228.314	0.407428	0.127155	3.20418	0.0013545	0.0603605	Gm39469	lncRNA
ENSMUSG00000026173	1793.22	0.416856	0.130181	3.20212	0.00136422	0.0605213	Plcd4	protein_coding
ENSMUSG00000064360	21285.7	-0.502138	0.157039	-3.19754	0.00138605	0.0609429	mt-Nd3	protein_coding	mitochondrion
ENSMUSG00000046139	923.076	-0.276048	0.0863284	-3.19765	0.0013855	0.0609429	Patl1	protein_coding
ENSMUSG00000074415	132.637	0.503173	0.157586	3.19301	0.00140798	0.0616333	Mir100hg	lncRNA
ENSMUSG00000037475	435.7	0.438676	0.137478	3.19087	0.00141845	0.0618181	Thoc2	protein_coding
ENSMUSG00000047036	409.342	0.520429	0.163839	3.17647	0.0014908	0.0645351	Zfp445	protein_coding
ENSMUSG00000033705	118.211	0.485494	0.152869	3.17588	0.00149384	0.0645351	Stard9	protein_coding
ENSMUSG00000031229	734.669	0.591943	0.186604	3.17218	0.00151298	0.0645553	Atrx	protein_coding
ENSMUSG00000074733	89.0792	0.652535	0.20556	3.17443	0.00150133	0.0645553	Zfp950	protein_coding
ENSMUSG00000051985	137.75	1.13901	0.359081	3.17201	0.00151388	0.0645553	Igfn1	protein_coding
ENSMUSG00000024921	862.423	0.328617	0.103718	3.16836	0.00153304	0.0650916	Smarca2	protein_coding
ENSMUSG00000058594	334.53	0.325324	0.102745	3.16633	0.00154378	0.0652676	Fbh1	protein_coding
ENSMUSG00000043445	960.259	-0.288232	0.0912304	-3.15938	0.00158105	0.0662766	Pgp	protein_coding
ENSMUSG00000140415	611.696	0.339661	0.107469	3.16054	0.00157476	0.0662766	ENSMUSG00000140415	lncRNA
ENSMUSG00000068523	1135.17	-0.252063	0.0798479	-3.15678	0.00159519	0.0663727	Gng5	protein_coding	mitochondrion
ENSMUSG00000006740	2917.27	0.27883	0.0883351	3.1565	0.00159675	0.0663727	Kif5b	protein_coding
ENSMUSG00000054958	237.597	0.369194	0.117038	3.15449	0.00160781	0.0665525	Nt5c1a	protein_coding
ENSMUSG00000034647	268.62	0.670027	0.212563	3.15213	0.00162082	0.0668114	Ankrd12	protein_coding
ENSMUSG00000001946	265.159	0.311726	0.0989565	3.15013	0.00163199	0.0669929	Esam	protein_coding
ENSMUSG00000020982	314.135	0.451997	0.143799	3.14325	0.00167084	0.0683042	Nemf	protein_coding
ENSMUSG00000041733	1323.32	-0.229915	0.073269	-3.13796	0.0017013	0.0683739	Coq5	protein_coding	mitochondrion
ENSMUSG00000029571	2296.78	-0.194426	0.0619153	-3.1402	0.00168835	0.0683739	Tmem106b	protein_coding
ENSMUSG00000035459	77.6855	-0.563588	0.179728	-3.13577	0.00171401	0.0683739	Stab2	protein_coding
ENSMUSG00000035545	251.011	0.402766	0.128423	3.13624	0.00171132	0.0683739	Leng8	protein_coding
ENSMUSG00000049421	777.438	0.330184	0.10516	3.13982	0.00169052	0.0683739	Zfp260	protein_coding
ENSMUSG00000053198	124.044	1.26937	0.404706	3.13652	0.00170965	0.0683739	Prx	protein_coding
ENSMUSG00000070733	606.428	0.320174	0.102291	3.13002	0.00174793	0.0691692	Fryl	protein_coding
ENSMUSG00000031592	1101.39	0.34605	0.110539	3.13059	0.00174458	0.0691692	Pcm1	protein_coding
ENSMUSG00000058070	1335.55	0.232409	0.0743303	3.12671	0.00176775	0.0696748	Eml1	protein_coding
ENSMUSG00000073700	1616.35	-0.22552	0.0722073	-3.12322	0.00178882	0.0699477	Klhl21	protein_coding
ENSMUSG00000045103	3206.14	0.56023	0.17931	3.12436	0.00178192	0.0699477	Dmd	protein_coding
ENSMUSG00000042453	74.433	1.18048	0.37832	3.12031	0.0018066	0.0703649	Reln	protein_coding
ENSMUSG00000029265	589.63	-0.257243	0.0825821	-3.115	0.00183943	0.0708057	Dr1	protein_coding
ENSMUSG00000027422	380.855	0.537371	0.172462	3.11589	0.00183392	0.0708057	Rrbp1	protein_coding
ENSMUSG00000019820	1013.09	0.438111	0.140583	3.11639	0.00183078	0.0708057	Utrn	protein_coding
ENSMUSG00000005625	2109.77	0.195172	0.0626785	3.11386	0.00184654	0.0708057	Psmd4	protein_coding
ENSMUSG00000040918	166.546	-0.508145	0.163444	-3.10899	0.0018773	0.071707	Slc19a2	protein_coding
ENSMUSG00000029776	2209.05	-0.283876	0.091558	-3.10051	0.00193191	0.072461	Hibadh	protein_coding	mitochondrion
ENSMUSG00000031734	74.8132	-0.866376	0.279455	-3.10024	0.00193366	0.072461	Irx3	protein_coding
ENSMUSG00000031010	3233.47	0.273552	0.0882123	3.10107	0.00192825	0.072461	Usp9x	protein_coding
ENSMUSG00000079428	614.557	0.285136	0.0919077	3.10242	0.00191945	0.072461	Tceal7	protein_coding
ENSMUSG00000006205	269.903	0.340026	0.109601	3.1024	0.0019196	0.072461	Htra1	protein_coding
ENSMUSG00000026568	3990.37	-0.240158	0.0776075	-3.09452	0.00197132	0.0724664	Mpc2	protein_coding	mitochondrion
ENSMUSG00000074064	721.186	-0.343451	0.111015	-3.09373	0.00197654	0.0724664	Mlycd	protein_coding	mitochondrion
ENSMUSG00000020844	332.331	-0.350238	0.113122	-3.09612	0.00196073	0.0724664	Nxn	protein_coding
ENSMUSG00000063015	876.413	-0.272384	0.0880803	-3.09246	0.00198508	0.0724664	Ccni	protein_coding
ENSMUSG00000020680	202.988	0.356967	0.115359	3.09439	0.0019722	0.0724664	Taf15	protein_coding
ENSMUSG00000024474	722.195	0.382281	0.123578	3.09344	0.00197851	0.0724664	Ik	protein_coding
ENSMUSG00000019978	673.272	0.440347	0.1422	3.09668	0.00195703	0.0724664	Epb41l2	protein_coding
ENSMUSG00000005417	1913.49	0.165589	0.0536188	3.08827	0.00201329	0.0732259	Mprip	protein_coding
ENSMUSG00000109901	626.609	-0.301447	0.097768	-3.08329	0.00204725	0.0739175	Chmp1b	protein_coding
ENSMUSG00000056153	948.888	-0.251154	0.0814516	-3.08347	0.00204602	0.0739175	Socs6	protein_coding
ENSMUSG00000018848	548.656	0.373911	0.1215	3.07745	0.00208777	0.0748972	Rars1	protein_coding
ENSMUSG00000038244	1490.15	0.660584	0.21467	3.0772	0.00208952	0.0748972	Mical2	protein_coding
ENSMUSG00000028530	4098.49	0.286409	0.0931177	3.07577	0.00209957	0.0749858	Jak1	protein_coding
ENSMUSG00000036309	3092.73	0.203525	0.0664941	3.0608	0.00220747	0.0783309	Skp1	protein_coding
ENSMUSG00000030122	369.543	0.399002	0.130368	3.06058	0.00220907	0.0783309	Ptms	protein_coding
ENSMUSG00000019326	139.256	0.930248	0.304429	3.05571	0.00224525	0.0793296	Aoc3	protein_coding
ENSMUSG00000022961	3349.87	0.208584	0.0683034	3.05379	0.0022597	0.0795561	Son	protein_coding
ENSMUSG00000027520	74.9987	0.557506	0.182632	3.05261	0.00226858	0.0795852	Zdbf2	protein_coding
ENSMUSG00000021027	1454.05	0.303351	0.0995156	3.04828	0.00230156	0.0804571	Ralgapa1	protein_coding
ENSMUSG00000044080	1119.58	-0.25893	0.0850415	-3.04475	0.00232877	0.0808371	S100a1	protein_coding	mitochondrion
ENSMUSG00000006005	1406.85	0.683066	0.224273	3.04568	0.00232152	0.0808371	Tpr	protein_coding
ENSMUSG00000031386	1300.14	-0.215044	0.0706639	-3.04319	0.00234084	0.0809718	Hcfc1	protein_coding
ENSMUSG00000029486	672.63	-0.244181	0.0803109	-3.04044	0.0023623	0.0814293	Mrpl1	protein_coding	mitochondrion
ENSMUSG00000019907	530.34	0.275886	0.0909202	3.03437	0.00241037	0.0827978	Ppp1r12a	protein_coding
ENSMUSG00000090659	70.3177	0.627272	0.206951	3.03102	0.00243732	0.0834338	Zfp493	protein_coding
ENSMUSG00000035357	2278.71	-0.311942	0.103054	-3.02696	0.00247024	0.0842692	Pdzrn3	protein_coding
ENSMUSG00000031352	879.58	-0.253721	0.0841512	-3.01506	0.00256929	0.0864558	Hccs	protein_coding	mitochondrion
ENSMUSG00000018102	879.256	-0.289906	0.0961099	-3.0164	0.00255795	0.0864558	H2bc4	protein_coding
ENSMUSG00000022517	1012.17	-0.24331	0.0806273	-3.01771	0.0025469	0.0864558	Mgrn1	protein_coding
ENSMUSG00000068566	779.409	0.2918	0.0967511	3.01598	0.00256149	0.0864558	Myadm	protein_coding
ENSMUSG00000025940	1305.98	-0.196216	0.0651376	-3.01234	0.00259243	0.0869386	Tmem70	protein_coding	mitochondrion
ENSMUSG00000062980	752.849	0.353326	0.117333	3.0113	0.00260133	0.0869425	Cped1	protein_coding
ENSMUSG00000046603	884.83	-0.283613	0.0943053	-3.00739	0.00263504	0.0870727	Tcaim	protein_coding	mitochondrion
ENSMUSG00000046675	112.784	-0.444263	0.147649	-3.00891	0.0026219	0.0870727	Lyset	protein_coding
ENSMUSG00000022043	2248.44	-0.287176	0.0955098	-3.00677	0.00264043	0.0870727	Trim35	protein_coding
ENSMUSG00000034165	168.987	0.46377	0.154184	3.00789	0.00263071	0.0870727	Ccnd3	protein_coding
ENSMUSG00000010914	1448.47	-0.276822	0.0922752	-2.99996	0.00270016	0.0881606	Pdhx	protein_coding	mitochondrion
ENSMUSG00000027519	1264.53	-0.19867	0.0661906	-3.00148	0.00268669	0.0881606	Rab22a	protein_coding
ENSMUSG00000019916	1079.88	0.284519	0.0948356	3.00013	0.00269865	0.0881606	P4ha1	protein_coding
ENSMUSG00000048109	362.123	-0.290787	0.0970023	-2.99773	0.00271996	0.088515	Rbm15	protein_coding
ENSMUSG00000027381	85.9673	-0.534013	0.178389	-2.99354	0.00275766	0.0894476	Bcl2l11	protein_coding	mitochondrion
ENSMUSG00000037656	1215.8	-0.24419	0.0817009	-2.98882	0.00280055	0.0902471	Slc20a2	protein_coding
ENSMUSG00000019124	62.466	0.841252	0.28143	2.98921	0.00279702	0.0902471	Scrn1	protein_coding
ENSMUSG00000035248	701.313	0.353813	0.118496	2.98587	0.00282774	0.0908272	Tut7	protein_coding
ENSMUSG00000034525	525.447	0.256442	0.0859292	2.98435	0.00284183	0.0909847	Ice1	protein_coding
ENSMUSG00000047875	1176.83	-0.458899	0.153949	-2.98086	0.00287442	0.0917309	Gpr157	protein_coding
ENSMUSG00000000805	101.254	-0.659623	0.221755	-2.97456	0.00293411	0.093335	Car4	protein_coding
ENSMUSG00000025092	169.088	0.550123	0.185037	2.97304	0.00294864	0.0933587	Hspa12a	protein_coding
ENSMUSG00000001911	5863.72	0.243363	0.081871	2.97251	0.00295373	0.0933587	Nfix	protein_coding
ENSMUSG00000028834	2056.44	-0.339911	0.114391	-2.97148	0.00296365	0.0933738	Trim63	protein_coding
ENSMUSG00000032902	1351.44	-0.345933	0.116547	-2.96818	0.00299572	0.0936631	Slc16a1	protein_coding	mitochondrion
ENSMUSG00000042271	114.273	-0.477855	0.161076	-2.96664	0.0030107	0.0936631	Nxt2	protein_coding
ENSMUSG00000096810	131.659	-0.439963	0.148222	-2.96827	0.0029948	0.0936631	Gm10481	processed_pseudogene
ENSMUSG00000026229	2623.9	0.206375	0.0695611	2.96681	0.00300906	0.0936631	Psmd1	protein_coding
ENSMUSG00000027601	699.094	-0.349913	0.118103	-2.96277	0.00304889	0.0942916	Mtfr1	protein_coding	mitochondrion
ENSMUSG00000025241	7002.33	0.272303	0.0919116	2.96266	0.00304997	0.0942916	Fyco1	protein_coding
ENSMUSG00000021764	2925.38	-0.167233	0.0564798	-2.96093	0.00306713	0.0943243	Ndufs4	protein_coding	mitochondrion
ENSMUSG00000027562	131.418	-0.468458	0.158229	-2.96063	0.00307009	0.0943243	Car2	protein_coding
ENSMUSG00000031708	3632.49	0.376297	0.12739	2.9539	0.00313789	0.096109	Tecr	protein_coding
ENSMUSG00000024642	365.079	-0.359104	0.121887	-2.9462	0.00321705	0.0961518	Tle4	protein_coding
ENSMUSG00000016409	331.596	-0.279152	0.0946121	-2.95049	0.00317271	0.0961518	Nkap	protein_coding
ENSMUSG00000029804	1147.44	-0.250747	0.0850856	-2.94699	0.00320881	0.0961518	Herc3	protein_coding
ENSMUSG00000141942	100.606	0.745684	0.252804	2.94965	0.00318137	0.0961518	ENSMUSG00000141942	lncRNA
ENSMUSG00000040562	1073.47	0.366029	0.124009	2.95165	0.00316085	0.0961518	Gstm2	protein_coding
ENSMUSG00000004665	102.924	0.501555	0.170113	2.94836	0.00319464	0.0961518	Cnn2	protein_coding
ENSMUSG00000027375	86.0301	1.29762	0.440172	2.94798	0.00319859	0.0961518	Mal	protein_coding
ENSMUSG00000119584	557533	0.849968	0.28823	2.94892	0.00318885	0.0961518	Rn18s-rs5	rRNA
ENSMUSG00000002748	826.17	0.305918	0.10389	2.94463	0.00323337	0.0963487	Baz1b	protein_coding
ENSMUSG00000074519	108.647	0.638829	0.217055	2.94316	0.0032488	0.0965176	Zfp971	protein_coding
ENSMUSG00000023951	1949.71	-0.377524	0.128371	-2.94089	0.00327275	0.0969382	Vegfa	protein_coding
ENSMUSG00000024134	120.477	0.612797	0.20844	2.93992	0.00328299	0.0969511	Six2	protein_coding
ENSMUSG00000035275	130.137	-0.58656	0.199945	-2.93361	0.00335042	0.09857	Raver2	protein_coding
ENSMUSG00000028132	2203.66	-0.18339	0.0625278	-2.93294	0.00335774	0.09857	Tlcd4	protein_coding
ENSMUSG00000061755	472.086	0.571336	0.19493	2.93099	0.00337885	0.0988965	Bod1l	protein_coding
ENSMUSG00000083219	318.044	-0.347219	0.118611	-2.92739	0.00341825	0.0995191	Gm11410	processed_pseudogene
ENSMUSG00000040549	745.358	0.296212	0.101193	2.9272	0.00342025	0.0995191	Ckap5	protein_coding
ENSMUSG00000046434	290.619	0.411926	0.140866	2.92423	0.00345308	0.10018	Hnrnpa1	protein_coding
ENSMUSG00000021054	753.486	-0.222571	0.076203	-2.92077	0.00349168	0.100709	Sgpp1	protein_coding
ENSMUSG00000022508	1446.73	0.394904	0.135167	2.9216	0.00348237	0.100709	Bcl6	protein_coding
ENSMUSG00000035686	135.082	0.704482	0.241545	2.91656	0.00353913	0.101781	Thrsp	protein_coding
ENSMUSG00000029103	738.338	0.255949	0.0877996	2.91514	0.00355524	0.101948	Lrpap1	protein_coding
ENSMUSG00000024238	1063.45	0.317808	0.109138	2.91199	0.00359136	0.102686	Zeb1	protein_coding
ENSMUSG00000026960	182.479	-0.390676	0.134313	-2.9087	0.00362935	0.103473	Arl6ip6	protein_coding
ENSMUSG00000038708	7803.97	0.754485	0.259491	2.90756	0.00364264	0.103554	Golga4	protein_coding
ENSMUSG00000038335	460.907	0.338529	0.116476	2.90642	0.00365594	0.103634	Tsr1	protein_coding
ENSMUSG00000000296	552.069	-0.324304	0.111808	-2.90055	0.00372503	0.105291	Tpd52l1	protein_coding
ENSMUSG00000054690	201.084	0.380582	0.131313	2.89828	0.00375213	0.105755	Emcn	protein_coding
ENSMUSG00000031672	3512.5	-0.259837	0.0896899	-2.89707	0.0037667	0.105864	Got2	protein_coding
ENSMUSG00000022244	282.125	-0.334812	0.115764	-2.8922	0.00382556	0.107213	Amacr	protein_coding
ENSMUSG00000025862	1498.81	0.344724	0.119309	2.88934	0.00386054	0.107888	Stag2	protein_coding
ENSMUSG00000024974	439.031	0.368791	0.127843	2.88472	0.00391766	0.109176	Smc3	protein_coding
ENSMUSG00000011831	328.511	0.333171	0.115617	2.88168	0.00395567	0.109925	Evi5	protein_coding
ENSMUSG00000034422	132.415	0.476164	0.165372	2.87935	0.0039849	0.110428	Parp14	protein_coding
ENSMUSG00000056367	122.625	-0.843513	0.293264	-2.87629	0.0040238	0.110845	Actr3b	protein_coding
ENSMUSG00000020653	94.2272	-0.579411	0.201742	-2.87203	0.0040784	0.110845	Klf11	protein_coding
ENSMUSG00000031393	853.823	-0.292329	0.10176	-2.87273	0.00406938	0.110845	Mecp2	protein_coding
ENSMUSG00000058446	1103.15	-0.258065	0.0897115	-2.87661	0.00401968	0.110845	Znrf2	protein_coding
ENSMUSG00000024099	9107.32	-0.210535	0.0732938	-2.87249	0.00407257	0.110845	Ndufv2	protein_coding
ENSMUSG00000031924	1674.86	-0.177368	0.0616825	-2.8755	0.00403385	0.110845	Cyb5b	protein_coding	mito
ENSMUSG00000020150	165.583	0.527437	0.183598	2.87278	0.00406881	0.110845	Gamt	protein_coding
ENSMUSG00000056919	79.0424	0.521412	0.181781	2.86835	0.00412616	0.111836	Cep162	protein_coding
ENSMUSG00000027111	614.087	0.315419	0.11011	2.86457	0.00417572	0.11287	Itga6	protein_coding
ENSMUSG00000021520	3733.69	-0.189471	0.0661775	-2.86308	0.00419547	0.113095	Uqcrb	protein_coding
ENSMUSG00000037270	1141.86	0.500741	0.174974	2.8618	0.00421236	0.113242	Bltp1	protein_coding
ENSMUSG00000030551	445.791	0.361472	0.126778	2.85123	0.00435508	0.116761	Nr2f2	protein_coding
ENSMUSG00000032393	3459.35	0.13504	0.0473942	2.8493	0.00438154	0.116924	Dpp8	protein_coding
ENSMUSG00000063450	479.06	0.242307	0.0850697	2.84834	0.00439485	0.116924	Syne2	protein_coding
ENSMUSG00000070385	21984.8	0.265239	0.0931247	2.84821	0.00439661	0.116924	Ampd1	protein_coding
ENSMUSG00000046312	2446.54	0.190463	0.0669617	2.84436	0.00445006	0.117399	Myorg	protein_coding
ENSMUSG00000051747	264198	0.255802	0.0899153	2.84492	0.00444222	0.117399	Ttn	protein_coding
ENSMUSG00000038039	428.845	0.509554	0.179061	2.84571	0.0044313	0.117399	Gcc2	protein_coding
ENSMUSG00000034648	254.76	-0.649608	0.228498	-2.84295	0.00446979	0.117605	Lrrn1	protein_coding
ENSMUSG00000006699	3592.6	-0.154235	0.0542864	-2.84114	0.00449528	0.117962	Cdc42	protein_coding
ENSMUSG00000020309	337.267	-0.315046	0.11097	-2.83903	0.00452508	0.11843	Chac2	protein_coding
ENSMUSG00000039126	122.582	-0.481559	0.169859	-2.83506	0.00458172	0.119122	Prune2	protein_coding
ENSMUSG00000021731	608.736	-0.267704	0.0944052	-2.83569	0.00457263	0.119122	Mrps30	protein_coding
ENSMUSG00000038028	1753.59	-0.226986	0.0800755	-2.83465	0.00458762	0.119122	Tigar	protein_coding
ENSMUSG00000024063	70.0455	0.586677	0.207094	2.8329	0.00461274	0.11946	Lbh	protein_coding
ENSMUSG00000061455	897.13	0.227028	0.0802252	2.82989	0.00465645	0.120277	Stx17	protein_coding
ENSMUSG00000078636	414.894	-0.299376	0.106029	-2.82354	0.00474962	0.121781	Gm7336	processed_pseudogene
ENSMUSG00000012535	852.837	0.224584	0.0796197	2.82071	0.00479175	0.121781	Tnpo3	protein_coding
ENSMUSG00000051223	1037.43	0.295175	0.10464	2.82087	0.00478931	0.121781	Bzw1	protein_coding
ENSMUSG00000040785	1253	0.34404	0.121877	2.82284	0.00476001	0.121781	Ttc3	protein_coding
ENSMUSG00000014232	110.897	0.420765	0.149103	2.82197	0.00477291	0.121781	Cluap1	protein_coding
ENSMUSG00000096255	124.149	0.499412	0.17709	2.8201	0.00480083	0.121781	Dynlt1b	protein_coding
ENSMUSG00000031425	85.0774	1.04575	0.370491	2.82261	0.00476347	0.121781	Plp1	protein_coding
ENSMUSG00000044308	10220.9	0.242477	0.0860335	2.81841	0.00482625	0.122113	Ubr3	protein_coding
ENSMUSG00000020889	2019.56	-0.288503	0.102477	-2.8153	0.00487324	0.122987	Nr1d1	protein_coding
ENSMUSG00000031320	2068.47	0.279753	0.0995646	2.80976	0.00495783	0.123858	Rps4x	protein_coding
ENSMUSG00000048118	210.614	0.36226	0.128921	2.80993	0.00495519	0.123858	Arid4a	protein_coding
ENSMUSG00000097392	227.041	0.364003	0.129509	2.81065	0.00494412	0.123858	Thoc2l	protein_coding
ENSMUSG00000029250	941.304	0.380105	0.135212	2.81117	0.00493617	0.123858	Polr2b	protein_coding
ENSMUSG00000026987	359.43	0.38234	0.136139	2.80845	0.00497809	0.124051	Baz2b	protein_coding
ENSMUSG00000036273	119.11	0.431438	0.153688	2.80724	0.00499679	0.124204	Lrrk2	protein_coding
ENSMUSG00000098203	67.6641	-0.56509	0.201577	-2.80334	0.00505765	0.124626	Gm9568	processed_pseudogene
ENSMUSG00000068699	8222.63	-0.488531	0.174163	-2.80503	0.00503118	0.124626	Flnc	protein_coding
ENSMUSG00000014905	1201.13	-0.227042	0.0809665	-2.80414	0.00504504	0.124626	Dnajb9	protein_coding
ENSMUSG00000024661	25650.5	0.155007	0.0553018	2.80292	0.00506417	0.124626	Fth1	protein_coding
ENSMUSG00000021226	181.435	-0.597296	0.213624	-2.79601	0.00517373	0.127007	Acot2	protein_coding
ENSMUSG00000021660	998.007	0.206939	0.0741227	2.79184	0.00524097	0.128339	Btf3	protein_coding
ENSMUSG00000047246	116.263	-0.538973	0.193167	-2.79019	0.00526776	0.12836	H2bc6	protein_coding
ENSMUSG00000025971	347.823	-0.366125	0.131191	-2.79078	0.00525816	0.12836	Maip1	protein_coding	mito
ENSMUSG00000027004	175.944	-0.596871	0.214089	-2.78796	0.00530416	0.12855	Frzb	protein_coding
ENSMUSG00000055943	731.8	-0.252653	0.0906371	-2.78752	0.00531128	0.12855	Emc7	protein_coding
ENSMUSG00000042410	645.354	-0.20507	0.0735724	-2.78732	0.00531458	0.12855	Agps	protein_coding
ENSMUSG00000056608	450.187	0.45425	0.163114	2.78486	0.0053551	0.129215	Chd9	protein_coding
ENSMUSG00000022710	1467.81	0.173255	0.0622792	2.78191	0.00540405	0.130078	Usp7	protein_coding
ENSMUSG00000046470	128.539	0.433452	0.156123	2.77635	0.00549723	0.132	Sox18	protein_coding
ENSMUSG00000020794	2479.22	-0.303221	0.109388	-2.77199	0.00557153	0.13218	Ube2g1	protein_coding
ENSMUSG00000073131	711.434	-0.246792	0.0889932	-2.77316	0.00555151	0.13218	Vma21	protein_coding
ENSMUSG00000045983	9918.76	0.190217	0.068602	2.77276	0.00555828	0.13218	Eif4g1	protein_coding
ENSMUSG00000020571	590.675	0.349078	0.125874	2.77323	0.00555026	0.13218	Pdia6	protein_coding
ENSMUSG00000049658	444.983	0.357066	0.12872	2.77398	0.00553758	0.13218	Bdp1	protein_coding
ENSMUSG00000081043	219.925	-0.41271	0.149094	-2.76812	0.00563808	0.132643	Gm11512	processed_pseudogene
ENSMUSG00000020448	363.932	-0.273184	0.0986983	-2.76787	0.00564243	0.132643	Rnf185	protein_coding
ENSMUSG00000027953	116.82	0.415487	0.150118	2.76774	0.00564466	0.132643	Slc50a1	protein_coding
ENSMUSG00000100131	4791.53	-0.219692	0.079316	-2.76983	0.00560847	0.132643	Gm28439	unprocessed_pseudogene
ENSMUSG00000004151	106.679	-0.475299	0.171832	-2.76607	0.00567365	0.132976	Etv1	protein_coding
ENSMUSG00000066687	1152.28	-0.470489	0.170174	-2.76476	0.0056965	0.132976	Zbtb16	protein_coding
ENSMUSG00000035158	336.895	-0.361838	0.130916	-2.7639	0.00571159	0.132976	Mitf	protein_coding
ENSMUSG00000004530	182.888	0.461914	0.167128	2.76384	0.00571262	0.132976	Coro1c	protein_coding
ENSMUSG00000018909	310.867	-0.346885	0.125575	-2.76237	0.00573831	0.133261	Arrb1	protein_coding
ENSMUSG00000039233	229.976	0.325026	0.117803	2.75907	0.00579659	0.134299	Tbce	protein_coding
ENSMUSG00000020300	3310.59	-0.406203	0.147355	-2.75663	0.00583996	0.134673	Cpeb4	protein_coding
ENSMUSG00000042742	338.739	-0.32106	0.116437	-2.75738	0.00582658	0.134673	Bmt2	protein_coding
ENSMUSG00000039987	3484.64	0.213101	0.0773401	2.75538	0.00586244	0.134877	Phtf2	protein_coding
ENSMUSG00000030861	2660.53	0.151267	0.054967	2.75197	0.0059238	0.135345	Acadsb	protein_coding
ENSMUSG00000028017	629.56	0.281473	0.102235	2.75321	0.00590146	0.135345	Egf	protein_coding
ENSMUSG00000079363	144.977	0.912444	0.331503	2.75245	0.00591517	0.135345	Gbp4	protein_coding
ENSMUSG00000049470	2020.53	0.174172	0.0633686	2.74856	0.00598576	0.136445	Aff4	protein_coding
ENSMUSG00000019132	1384.88	-0.241198	0.0878735	-2.74484	0.00605412	0.13737	BC005537	protein_coding
ENSMUSG00000027199	157.497	1.01599	0.370076	2.74535	0.00604469	0.13737	Gatm	protein_coding
ENSMUSG00000038383	372.061	-0.272573	0.0993849	-2.7426	0.00609558	0.137823	Pigu	protein_coding
ENSMUSG00000022878	126.071	2.28727	0.834084	2.74225	0.00610192	0.137823	Adipoq	protein_coding
ENSMUSG00000050315	11967.5	-0.305385	0.111484	-2.73926	0.00615773	0.138531	Synpo2	protein_coding
ENSMUSG00000039585	310.539	0.398234	0.14539	2.73907	0.00616127	0.138531	Myo9a	protein_coding
ENSMUSG00000040850	7575.3	0.237869	0.0869817	2.73471	0.00624357	0.139116	Psme4	protein_coding
ENSMUSG00000020719	4873.03	0.246888	0.0902789	2.73473	0.0062432	0.139116	Ddx5	protein_coding
ENSMUSG00000033991	496.818	0.293005	0.107082	2.73628	0.00621387	0.139116	Skic3	protein_coding
ENSMUSG00000028282	157.945	0.555255	0.202976	2.73557	0.00622718	0.139116	Casp8ap2	protein_coding
ENSMUSG00000020521	862.947	-0.207891	0.0760998	-2.73182	0.00629854	0.139399	Rnft1	protein_coding
ENSMUSG00000004891	392.273	0.40886	0.149628	2.73252	0.00628524	0.139399	Nes	protein_coding
ENSMUSG00000037029	240.367	0.447426	0.163756	2.73227	0.00629002	0.139399	Zfp146	protein_coding
ENSMUSG00000031099	73.6478	-0.527873	0.193321	-2.73055	0.0063229	0.139626	Smarca1	protein_coding
ENSMUSG00000027706	972.208	0.261787	0.0959412	2.72862	0.00636002	0.140133	Sec62	protein_coding
ENSMUSG00000021044	252.736	-0.281029	0.103034	-2.72755	0.00638074	0.140277	Adck1	protein_coding
ENSMUSG00000022141	907.618	0.286926	0.105241	2.72639	0.00640321	0.140459	Nipbl	protein_coding
ENSMUSG00000040584	204.618	0.39178	0.143775	2.72495	0.00643118	0.140517	Abcb1a	protein_coding
ENSMUSG00000030278	69.1907	2.51734	0.923866	2.72479	0.00643429	0.140517	Cidec	protein_coding
ENSMUSG00000036304	213.029	-0.635389	0.233661	-2.71927	0.00654256	0.141732	Zdhhc23	protein_coding
ENSMUSG00000010122	353.836	-0.434551	0.159818	-2.71904	0.00654719	0.141732	Slc47a1	protein_coding
ENSMUSG00000039630	1891.37	0.277172	0.101906	2.71988	0.00653047	0.141732	Hnrnpu	protein_coding
ENSMUSG00000026495	333.799	0.338349	0.124389	2.72009	0.00652644	0.141732	Efcab2	protein_coding
ENSMUSG00000019370	3723.33	0.191524	0.0704871	2.71715	0.00658461	0.141921	Calm3	protein_coding
ENSMUSG00000021500	796.841	0.355253	0.130711	2.71784	0.00657089	0.141921	Ddx46	protein_coding
ENSMUSG00000121606	95.5703	-0.429121	0.158016	-2.71567	0.0066141	0.142246	Akap17a	protein_coding
ENSMUSG00000028690	846.462	-0.169699	0.062524	-2.71414	0.00664485	0.142598	Mmachc	protein_coding
ENSMUSG00000035569	1651.47	0.16295	0.0600599	2.71313	0.00666514	0.142628	Ankrd11	protein_coding
ENSMUSG00000054808	1024.62	0.263834	0.0972611	2.71263	0.00667508	0.142628	Actn4	protein_coding
ENSMUSG00000030403	178.269	0.459691	0.169511	2.71187	0.00669049	0.142649	Vasp	protein_coding
ENSMUSG00000089862	154.752	-0.416998	0.153855	-2.71033	0.00672157	0.143003	Umad1	protein_coding
ENSMUSG00000036513	168.523	-0.359474	0.132788	-2.70713	0.00678686	0.143467	Commd2	protein_coding
ENSMUSG00000071014	1906.43	-0.230144	0.0850041	-2.70744	0.0067804	0.143467	Ndufb6	protein_coding
ENSMUSG00000039607	225.85	0.347136	0.128205	2.70766	0.00677594	0.143467	Rbms3	protein_coding
ENSMUSG00000026730	324.138	-0.283419	0.104773	-2.70508	0.00682871	0.143492	Pter	protein_coding
ENSMUSG00000020359	332.09	-0.250178	0.0924892	-2.70495	0.00683156	0.143492	Phykpl	protein_coding
ENSMUSG00000025487	907.879	0.193312	0.0714351	2.70612	0.00680746	0.143492	Psmd13	protein_coding
ENSMUSG00000038538	803.526	0.187452	0.0693393	2.7034	0.00686332	0.143549	Ubn2	protein_coding
ENSMUSG00000090272	70.2499	0.541215	0.200189	2.70352	0.00686083	0.143549	Mndal	protein_coding
ENSMUSG00000067369	338.898	-0.361429	0.133762	-2.70203	0.00689171	0.143813	Trmt2b	protein_coding
ENSMUSG00000028675	938.389	0.202351	0.0749062	2.70139	0.00690499	0.143813	Pnrc2	protein_coding
ENSMUSG00000032238	3254.21	0.265446	0.0984448	2.6964	0.00700944	0.145682	Rora	protein_coding
ENSMUSG00000047714	1975.27	-0.221561	0.082211	-2.69503	0.00703829	0.145744	Ppp1r2	protein_coding
ENSMUSG00000043940	1118.59	-0.204306	0.075833	-2.69416	0.00705666	0.145744	Wdfy3	protein_coding
ENSMUSG00000053510	3922.13	0.255091	0.0946662	2.69464	0.00704655	0.145744	Nrdc	protein_coding
ENSMUSG00000026014	571.085	-0.266514	0.0989752	-2.69273	0.0070869	0.145766	Raph1	protein_coding
ENSMUSG00000020741	2530.59	-0.210377	0.0781282	-2.69272	0.0070872	0.145766	Cluh	protein_coding
ENSMUSG00000044098	342.429	-0.306234	0.113775	-2.69159	0.00711122	0.145957	Rsbn1	protein_coding
ENSMUSG00000047735	168.328	0.546595	0.203263	2.6891	0.00716459	0.146748	Samd9l	protein_coding
ENSMUSG00000053754	603.893	0.320206	0.119184	2.68666	0.00721708	0.147518	Chd8	protein_coding
ENSMUSG00000026991	350.739	-0.349031	0.13004	-2.68403	0.00727408	0.148071	Pkp4	protein_coding
ENSMUSG00000027546	334.309	-0.245318	0.0913855	-2.68443	0.00726537	0.148071	Atp9a	protein_coding
ENSMUSG00000026239	310.626	-0.293807	0.109546	-2.68204	0.0073175	0.148344	Pde6d	protein_coding
ENSMUSG00000005628	5771.68	0.290343	0.108244	2.6823	0.00731181	0.148344	Tmod4	protein_coding
ENSMUSG00000033557	1328.66	-0.263532	0.0983626	-2.67918	0.00738018	0.149081	Fam20b	protein_coding
ENSMUSG00000067336	4051.83	-0.223767	0.0835259	-2.67901	0.007384	0.149081	Bmpr2	protein_coding
ENSMUSG00000097148	276.73	-0.439485	0.164159	-2.67719	0.00742418	0.149587	Gapdhrt	protein_coding
ENSMUSG00000034485	2862.86	0.334418	0.125061	2.67403	0.00749447	0.150391	Uaca	protein_coding
ENSMUSG00000046311	416.085	0.465529	0.174066	2.67444	0.00748542	0.150391	Zfp62	protein_coding
ENSMUSG00000023064	82.2461	0.941348	0.352317	2.67188	0.00754285	0.151055	Sncg	protein_coding
ENSMUSG00000042607	268.214	-0.41004	0.1536	-2.66953	0.00759581	0.151101	Asb4	protein_coding
ENSMUSG00000058704	680.686	-0.311366	0.116657	-2.66907	0.0076062	0.151101	Memo1	protein_coding
ENSMUSG00000027010	9747.79	-0.176463	0.0660765	-2.67059	0.00757188	0.151101	Slc25a12	protein_coding
ENSMUSG00000026615	4788.56	0.381685	0.142986	2.66938	0.00759907	0.151101	Eprs1	protein_coding
ENSMUSG00000029569	291.618	-0.25107	0.0941826	-2.66578	0.00768093	0.152177	Tmem168	protein_coding
ENSMUSG00000022370	855.74	-0.197859	0.0742342	-2.66534	0.00769116	0.152177	Mrpl13	protein_coding
ENSMUSG00000028525	1546.72	0.378826	0.142286	2.66243	0.00775798	0.153193	Pde4b	protein_coding
ENSMUSG00000061780	381.174	2.11757	0.795994	2.66028	0.00780746	0.153863	Cfd	protein_coding
ENSMUSG00000027496	133.591	-0.525722	0.197731	-2.65877	0.00784271	0.153944	Aurka	protein_coding
ENSMUSG00000034109	345.514	0.401649	0.151041	2.6592	0.00783254	0.153944	Golim4	protein_coding
ENSMUSG00000026234	2005.09	0.389038	0.146436	2.65671	0.00789079	0.154581	Ncl	protein_coding
ENSMUSG00000037736	2780.16	0.196033	0.0738625	2.65403	0.00795366	0.155229	Limch1	protein_coding
ENSMUSG00000019790	397.126	0.237633	0.089539	2.65396	0.00795524	0.155229	Stxbp5	protein_coding
ENSMUSG00000029761	1036.3	0.365264	0.137705	2.65251	0.00798946	0.15559	Cald1	protein_coding
ENSMUSG00000063428	563.423	-0.220062	0.0829986	-2.6514	0.00801588	0.155798	Ddo	protein_coding
ENSMUSG00000041459	1418.6	0.17605	0.0664444	2.64958	0.00805915	0.156251	Tardbp	protein_coding
ENSMUSG00000004044	2197.86	0.233158	0.0880448	2.64818	0.00809271	0.156251	Cavin1	protein_coding
ENSMUSG00000033149	204.877	0.388043	0.146554	2.64777	0.00810238	0.156251	Phldb2	protein_coding
ENSMUSG00000056569	653.379	1.57372	0.594088	2.64897	0.0080737	0.156251	Mpz	protein_coding
ENSMUSG00000025907	2244.15	0.387595	0.14667	2.64263	0.00822646	0.158335	Rb1cc1	protein_coding
ENSMUSG00000051335	89.2342	-0.592091	0.224114	-2.64192	0.00824379	0.158346	Gfod1	protein_coding
ENSMUSG00000031660	1414.15	0.159315	0.0603248	2.64095	0.0082674	0.158346	Brd7	protein_coding
ENSMUSG00000020706	294.274	0.395405	0.149739	2.64064	0.00827503	0.158346	Ftsj3	protein_coding
ENSMUSG00000034842	3584.73	0.163693	0.062012	2.6397	0.00829804	0.15848	Art3	protein_coding
ENSMUSG00000004069	1748.59	-0.145278	0.0550936	-2.63693	0.00836611	0.159472	Dnaja3	protein_coding
ENSMUSG00000061904	10509	-0.206779	0.0785796	-2.63146	0.00850176	0.161471	Slc25a3	protein_coding
ENSMUSG00000020608	744.774	0.360613	0.137043	2.63139	0.00850363	0.161471	Smc6	protein_coding
ENSMUSG00000001270	74.0428	0.513306	0.195147	2.63035	0.00852974	0.161657	Ckb	protein_coding
ENSMUSG00000085945	70.8838	-0.599124	0.227881	-2.62911	0.00856088	0.161852	2310014F06Rik	lncRNA
ENSMUSG00000057110	126.014	0.492315	0.187289	2.62864	0.00857278	0.161852	Cntrl	protein_coding
ENSMUSG00000035722	185.789	-0.352715	0.134291	-2.62649	0.00862696	0.162256	Abca7	protein_coding
ENSMUSG00000009418	362.288	-0.279021	0.106227	-2.62665	0.00862292	0.162256	Nav1	protein_coding
ENSMUSG00000066362	84.9144	-0.66678	0.254381	-2.62119	0.00876245	0.162723	Rps13-ps1	processed_pseudogene
ENSMUSG00000024855	193.796	-0.373146	0.142575	-2.61719	0.00886566	0.162723	Pacs1	protein_coding
ENSMUSG00000022792	212.399	-0.299773	0.114451	-2.61922	0.00881301	0.162723	Yars2	protein_coding
ENSMUSG00000013663	1283.48	-0.254262	0.0971494	-2.61723	0.00886463	0.162723	Pten	protein_coding
ENSMUSG00000022587	728.524	0.212944	0.0811749	2.62327	0.00870899	0.162723	Ly6e	protein_coding
ENSMUSG00000029802	435.986	0.223185	0.0851016	2.62257	0.00872683	0.162723	Abcg2	protein_coding
ENSMUSG00000054387	485.159	0.233702	0.0891812	2.62053	0.00877922	0.162723	Mdm4	protein_coding
ENSMUSG00000029422	683.038	0.280581	0.107162	2.61828	0.00883743	0.162723	Rsrc2	protein_coding
ENSMUSG00000014850	206.856	0.308259	0.117599	2.62127	0.00876017	0.162723	Msh3	protein_coding
ENSMUSG00000029428	144.214	0.360886	0.137607	2.62258	0.00872661	0.162723	Stx2	protein_coding
ENSMUSG00000026074	346.147	0.414951	0.158393	2.61976	0.00879911	0.162723	Map4k4	protein_coding
ENSMUSG00000034349	105.38	0.463006	0.176495	2.62334	0.00870716	0.162723	Smc4	protein_coding
ENSMUSG00000041607	498.018	1.67311	0.638884	2.6188	0.00882397	0.162723	Mbp	protein_coding
ENSMUSG00000034160	1957.61	0.161936	0.0619231	2.61511	0.00891978	0.163414	Ogt	protein_coding
ENSMUSG00000030105	2882.49	-0.123562	0.0473215	-2.61112	0.00902453	0.165027	Arl8b	protein_coding
ENSMUSG00000089718	255.581	-0.514139	0.196976	-2.61016	0.00905002	0.165188	2310075C17Rik	lncRNA
ENSMUSG00000028165	1085.87	-0.155941	0.0597989	-2.60776	0.00911373	0.166044	Cisd2	protein_coding
ENSMUSG00000054978	285.337	-0.440853	0.169119	-2.60676	0.00914041	0.166224	Kbtbd13	protein_coding
ENSMUSG00000036667	123.44	0.38985	0.149638	2.60528	0.00917994	0.166637	Tcaf1	protein_coding
ENSMUSG00000055003	88.5473	-0.567414	0.217926	-2.60371	0.0092222	0.166792	Lrtm2	protein_coding
ENSMUSG00000022558	225.975	-0.27917	0.107198	-2.60426	0.00920742	0.166792	Mroh1	protein_coding
ENSMUSG00000022752	1777.54	-0.194768	0.0748374	-2.60255	0.00925335	0.16705	Tomm70a	protein_coding
ENSMUSG00000027423	1509.23	0.179419	0.0689649	2.6016	0.00927902	0.167208	Snx5	protein_coding
ENSMUSG00000050668	215.983	0.331847	0.127593	2.60082	0.00930012	0.167284	Gpatch11	protein_coding
ENSMUSG00000024695	4885.28	-0.287309	0.110502	-2.60003	0.00932155	0.167365	Zfp91	protein_coding
ENSMUSG00000022139	9844.32	0.296949	0.114313	2.59769	0.00938542	0.168206	Mbnl2	protein_coding
ENSMUSG00000021242	370.07	0.246666	0.0950987	2.59379	0.00949245	0.169817	Npc2	protein_coding
ENSMUSG00000046573	101.581	-0.40078	0.154723	-2.59031	0.00958897	0.170312	Lyrm4	protein_coding
ENSMUSG00000020321	8552.58	-0.261098	0.100793	-2.59043	0.00958558	0.170312	Mdh1	protein_coding
ENSMUSG00000032860	395.361	-0.255956	0.0987734	-2.59134	0.00956025	0.170312	P2ry2	protein_coding
ENSMUSG00000026872	786.039	0.426567	0.164636	2.59098	0.00957043	0.170312	Zeb2	protein_coding
ENSMUSG00000025613	1525.61	0.240634	0.0929544	2.58874	0.00963288	0.170785	Cct8	protein_coding
ENSMUSG00000002980	326.616	0.253199	0.0978587	2.58739	0.00967062	0.170826	Bcam	protein_coding
ENSMUSG00000031403	365.004	0.254669	0.0984145	2.58772	0.00966145	0.170826	Dkc1	protein_coding
ENSMUSG00000000001	346.474	0.367074	0.141907	2.58673	0.00968923	0.170826	Gnai3	protein_coding
ENSMUSG00000019971	85.133	0.850255	0.328767	2.58619	0.00970426	0.170826	Cep290	protein_coding
ENSMUSG00000021109	661.923	-0.201924	0.078142	-2.58406	0.00976449	0.171581	Hif1a	protein_coding
ENSMUSG00000047821	820.12	-0.26059	0.100908	-2.58244	0.0098104	0.172082	Trim16	protein_coding
ENSMUSG00000029920	211.763	0.290694	0.112626	2.58106	0.00984966	0.172465	Smarcad1	protein_coding
ENSMUSG00000120512	223.476	0.430766	0.167033	2.57892	0.00991088	0.172925	5730409N16Rik	lncRNA
ENSMUSG00000019849	512.331	-0.281839	0.109285	-2.57893	0.00991078	0.172925	Prep	protein_coding
ENSMUSG00000026950	140744	0.236463	0.0918286	2.57505	0.0100225	0.174564	Neb	protein_coding
ENSMUSG00000028016	212.677	-0.325379	0.126416	-2.57386	0.010057	0.174857	Ints12	protein_coding
ENSMUSG00000025592	92.2236	-0.659588	0.256642	-2.57007	0.0101678	0.174939	Dach2	protein_coding
ENSMUSG00000055670	438.051	-0.246608	0.0959464	-2.57027	0.0101619	0.174939	Zzef1	protein_coding
ENSMUSG00000058799	1429.09	0.164313	0.0638997	2.57142	0.0101283	0.174939	Nap1l1	protein_coding
ENSMUSG00000035575	802.085	0.313201	0.121817	2.57108	0.0101382	0.174939	Utp6	protein_coding
ENSMUSG00000027438	179.848	0.429107	0.166902	2.57101	0.0101401	0.174939	Napb	protein_coding
ENSMUSG00000029014	403.46	0.437551	0.170061	2.57291	0.0100848	0.174939	Dnajc2	protein_coding
ENSMUSG00000039831	572.548	0.384098	0.149561	2.56817	0.0102236	0.175594	Arhgap29	protein_coding
ENSMUSG00000022995	725.518	-0.358767	0.13985	-2.56537	0.0103065	0.175691	Enah	protein_coding
ENSMUSG00000045996	219.802	-0.33431	0.130302	-2.56566	0.010298	0.175691	Polr2k	protein_coding
ENSMUSG00000024477	542.745	0.347717	0.135563	2.56498	0.0103181	0.175691	Pggt1b	protein_coding
ENSMUSG00000033799	304.615	0.450582	0.175605	2.56588	0.0102913	0.175691	Tasor2	protein_coding
ENSMUSG00000027243	87.5416	0.451273	0.17584	2.56638	0.0102765	0.175691	Harbi1	protein_coding
ENSMUSG00000027367	2111.55	-0.21918	0.0855496	-2.56203	0.0104064	0.176587	Stard7	protein_coding
ENSMUSG00000033671	1256.77	0.221434	0.0864175	2.56237	0.0103961	0.176587	Cep350	protein_coding
ENSMUSG00000028841	732.303	-0.367882	0.143731	-2.55952	0.0104815	0.177254	Cnksr1	protein_coding
ENSMUSG00000039000	1436.81	-0.255808	0.0999285	-2.55991	0.0104698	0.177254	Ube3c	protein_coding
ENSMUSG00000063694	2276.66	-0.233588	0.0912911	-2.55872	0.0105059	0.177364	Cycs	protein_coding
ENSMUSG00000043702	315.922	-0.394983	0.154522	-2.55616	0.0105836	0.178067	Pde12	protein_coding
ENSMUSG00000032872	557	-0.194186	0.0759649	-2.55627	0.0105802	0.178067	Cyb5r4	protein_coding
ENSMUSG00000041133	391.822	0.40497	0.158501	2.55499	0.010619	0.178359	Smc1a	protein_coding
ENSMUSG00000000340	752.685	0.232672	0.0910985	2.55407	0.0106473	0.178532	Dbt	protein_coding
ENSMUSG00000020275	221.274	-0.350464	0.137252	-2.55344	0.0106665	0.17855	Rel	protein_coding
ENSMUSG00000036202	426.662	0.375925	0.14728	2.55245	0.0106967	0.178754	Rif1	protein_coding
ENSMUSG00000040167	442.963	-0.279764	0.109649	-2.55146	0.0107273	0.178803	Ikzf5	protein_coding
ENSMUSG00000023277	1304.29	-0.276519	0.108438	-2.55002	0.0107717	0.178803	Twf2	protein_coding
ENSMUSG00000039512	661.278	-0.266838	0.104718	-2.54817	0.0108291	0.178803	Bltp3a	protein_coding
ENSMUSG00000059895	6004.68	-0.220653	0.0865912	-2.54822	0.0108275	0.178803	Ptp4a3	protein_coding
ENSMUSG00000024095	449.818	-0.21784	0.0854811	-2.5484	0.0108218	0.178803	Hnrnpll	protein_coding
ENSMUSG00000023175	10161.7	0.240755	0.094491	2.54791	0.010837	0.178803	Bsg	protein_coding
ENSMUSG00000048000	467.143	0.250327	0.0982571	2.54768	0.0108442	0.178803	Gigyf2	protein_coding
ENSMUSG00000039953	428.447	0.281705	0.110442	2.5507	0.0107508	0.178803	Clstn1	protein_coding
ENSMUSG00000036698	2351.27	-0.196411	0.0772032	-2.54407	0.0109568	0.180059	Ago2	protein_coding
ENSMUSG00000101249	7030.68	-0.183688	0.0721921	-2.54444	0.0109454	0.180059	Gm29216	unprocessed_pseudogene
ENSMUSG00000001627	771.868	-0.370786	0.145942	-2.54065	0.0110647	0.181291	Ifrd1	protein_coding
ENSMUSG00000032525	860.324	0.285387	0.112334	2.54053	0.0110684	0.181291	Nktr	protein_coding
ENSMUSG00000031712	132.342	-0.440509	0.173502	-2.53893	0.0111194	0.18154	Il15	protein_coding
ENSMUSG00000029202	846.538	0.272989	0.107523	2.5389	0.0111203	0.18154	Pds5a	protein_coding
ENSMUSG00000022519	27024.8	0.14131	0.0556791	2.53793	0.0111509	0.181739	Srl	protein_coding
ENSMUSG00000032328	3105.73	-0.202541	0.0798979	-2.535	0.0112447	0.182967	Tmem30a	protein_coding
ENSMUSG00000039474	1317.75	-0.397054	0.156753	-2.53299	0.0113094	0.183717	Wfs1	protein_coding
ENSMUSG00000117910	117.456	-0.389642	0.154012	-2.52993	0.0114084	0.184224	Gm50174	processed_pseudogene
ENSMUSG00000021868	494.783	-0.302376	0.119529	-2.52973	0.0114151	0.184224	Ppif	protein_coding
ENSMUSG00000025732	411.822	-0.261407	0.103328	-2.52987	0.0114103	0.184224	Mcrip2	protein_coding
ENSMUSG00000031987	5035.5	-0.198167	0.0783254	-2.53005	0.0114045	0.184224	Egln1	protein_coding
ENSMUSG00000033184	1418.03	-0.198327	0.0784233	-2.52893	0.0114411	0.184343	Tmed7	protein_coding
ENSMUSG00000061143	89.3628	-0.439398	0.173839	-2.52762	0.0114839	0.184628	Maml3	protein_coding
ENSMUSG00000024587	1607.32	0.211172	0.0835583	2.52725	0.0114961	0.184628	Nars1	protein_coding
ENSMUSG00000002103	489.242	0.233734	0.0925881	2.52445	0.0115879	0.185729	Acp2	protein_coding
ENSMUSG00000015143	294.543	0.352933	0.13983	2.52402	0.0116022	0.185729	Actn1	protein_coding
ENSMUSG00000037876	542.61	0.311957	0.123625	2.52342	0.011622	0.185745	Jmjd1c	protein_coding
ENSMUSG00000067873	1939.18	0.259918	0.10304	2.52249	0.0116527	0.185936	Htatsf1	protein_coding
ENSMUSG00000062627	155.469	0.385485	0.152896	2.52123	0.0116946	0.186304	Mysm1	protein_coding
ENSMUSG00000022110	7638.72	0.232267	0.0921521	2.52047	0.0117197	0.186403	Sucla2	protein_coding
ENSMUSG00000025656	468.121	-0.259848	0.103141	-2.51935	0.0117572	0.1867	Arhgef9	protein_coding
ENSMUSG00000004508	146.832	-0.42495	0.16875	-2.51823	0.0117948	0.186996	Gab2	protein_coding
ENSMUSG00000038582	4326.48	-0.215084	0.0854802	-2.51618	0.0118634	0.187483	Pptc7	protein_coding
ENSMUSG00000031146	98.0463	0.420761	0.167201	2.51649	0.0118529	0.187483	Plp2	protein_coding
ENSMUSG00000052707	564.927	0.248761	0.0988953	2.5154	0.0118898	0.187533	Tnrc6a	protein_coding
ENSMUSG00000020354	663.357	0.358092	0.142385	2.51496	0.0119044	0.187533	Sgcd	protein_coding
ENSMUSG00000064356	122.173	-0.389132	0.154937	-2.51154	0.0120206	0.187867	mt-Atp8	protein_coding
ENSMUSG00000028991	907.403	-0.174071	0.0693079	-2.51156	0.0120197	0.187867	Mtor	protein_coding
ENSMUSG00000035242	978.788	0.157517	0.0626937	2.51249	0.0119882	0.187867	Oaz1	protein_coding
ENSMUSG00000028348	2356.22	0.19788	0.0787484	2.51281	0.0119774	0.187867	Cavin4	protein_coding
ENSMUSG00000034898	1471.21	0.219623	0.0874291	2.51201	0.0120045	0.187867	Filip1	protein_coding
ENSMUSG00000031519	6153.93	-0.330666	0.13169	-2.51094	0.012041	0.187889	Asb5	protein_coding
ENSMUSG00000071528	2471.83	-0.171937	0.0685296	-2.50895	0.0121091	0.188654	Atp5mk	protein_coding
ENSMUSG00000024835	108.464	0.382721	0.152701	2.50634	0.0121988	0.189753	Coro1b	protein_coding
ENSMUSG00000005481	181.953	-0.336713	0.134471	-2.50398	0.0122804	0.190657	Ddx39a	protein_coding
ENSMUSG00000027346	8076.15	0.313158	0.125085	2.50355	0.0122955	0.190657	Gpcpd1	protein_coding
ENSMUSG00000047139	6440.05	-0.287282	0.114857	-2.50121	0.0123768	0.19076	Cd24a	protein_coding
ENSMUSG00000041528	1981.59	0.160055	0.0640058	2.50063	0.0123974	0.19076	Rnf123	protein_coding
ENSMUSG00000030738	2338.47	0.278646	0.111432	2.50059	0.0123985	0.19076	Eif3c	protein_coding
ENSMUSG00000055775	672.994	0.281125	0.112416	2.50076	0.0123928	0.19076	Myh8	protein_coding
ENSMUSG00000007827	79.4664	0.528027	0.211121	2.50107	0.0123819	0.19076	Ankrd26	protein_coding
ENSMUSG00000032565	79.5248	-0.457355	0.183026	-2.49885	0.0124597	0.190868	Nudt16	protein_coding
ENSMUSG00000039428	416.232	-0.234334	0.0938218	-2.49765	0.012502	0.190868	Tmem135	protein_coding
ENSMUSG00000030089	1099.21	-0.189332	0.0757915	-2.49807	0.0124872	0.190868	Slc41a3	protein_coding
ENSMUSG00000033182	875.846	0.220593	0.0882577	2.49942	0.0124396	0.190868	Kbtbd12	protein_coding
ENSMUSG00000029675	150.708	0.546903	0.218944	2.49791	0.0124927	0.190868	Eln	protein_coding
ENSMUSG00000055320	6051.76	-0.281037	0.112564	-2.49669	0.012536	0.191092	Tead1	protein_coding
ENSMUSG00000047604	102.861	-0.534931	0.214369	-2.49537	0.0125826	0.191507	Frat2	protein_coding
ENSMUSG00000014606	3198.12	-0.218896	0.0878421	-2.49193	0.0127053	0.192973	Slc25a11	protein_coding
ENSMUSG00000024073	1340.69	0.318177	0.127701	2.49157	0.0127179	0.192973	Birc6	protein_coding
ENSMUSG00000021820	3542.63	0.125168	0.050259	2.49045	0.0127581	0.193101	Camk2g	protein_coding
ENSMUSG00000003226	1632.24	0.293001	0.117659	2.49025	0.0127654	0.193101	Ranbp2	protein_coding
ENSMUSG00000030967	1933.03	-0.187909	0.0755386	-2.48759	0.0128612	0.194253	Zranb1	protein_coding
ENSMUSG00000082018	59.0442	-0.479851	0.193011	-2.48613	0.0129139	0.194752	Gm6322	processed_pseudogene
ENSMUSG00000036181	1552.2	-0.217183	0.0874292	-2.4841	0.0129878	0.195274	H1f2	protein_coding
ENSMUSG00000039262	3970.52	-0.162028	0.0652261	-2.4841	0.012988	0.195274	Prrc2b	protein_coding
ENSMUSG00000008540	396.694	-0.341176	0.137618	-2.47915	0.0131696	0.197074	Mgst1	protein_coding
ENSMUSG00000018882	705.489	-0.184255	0.0743523	-2.47814	0.013207	0.197074	Mrpl45	protein_coding
ENSMUSG00000026219	3236.6	0.161858	0.0653376	2.47726	0.0132394	0.197074	Trip12	protein_coding
ENSMUSG00000034021	983.409	0.233384	0.0941253	2.47951	0.0131564	0.197074	Pds5b	protein_coding
ENSMUSG00000038301	276.26	0.381398	0.153907	2.4781	0.0132083	0.197074	Snx10	protein_coding
ENSMUSG00000030016	633.501	0.441352	0.178176	2.47706	0.0132471	0.197074	Zfp638	protein_coding
ENSMUSG00000079017	70.7295	1.36436	0.550668	2.47764	0.0132255	0.197074	Ifi27l2a	protein_coding
ENSMUSG00000086863	132.307	-0.625837	0.253034	-2.47333	0.0133861	0.198243	Gm15543	lncRNA
ENSMUSG00000047221	199.947	-0.321546	0.130025	-2.47296	0.0134	0.198243	Fam185a	protein_coding
ENSMUSG00000034075	2498.72	-0.238769	0.0965583	-2.4728	0.0134059	0.198243	Zdhhc5	protein_coding
ENSMUSG00000016496	67.5752	0.733306	0.296379	2.47422	0.0133529	0.198243	Cd274	protein_coding
ENSMUSG00000066554	102.969	0.395625	0.160115	2.47088	0.013478	0.198715	Gm10167	processed_pseudogene
ENSMUSG00000034560	392.79	0.34257	0.138618	2.47133	0.0134612	0.198715	Washc4	protein_coding
ENSMUSG00000021188	873.264	0.360957	0.146128	2.47014	0.0135062	0.198834	Trip11	protein_coding
ENSMUSG00000063550	481.111	-0.301017	0.121921	-2.46895	0.013551	0.199197	Nup98	protein_coding
ENSMUSG00000003429	2169.72	0.157506	0.0638505	2.46679	0.0136329	0.200104	Rps11	protein_coding
ENSMUSG00000030214	306.27	-0.59696	0.242156	-2.46519	0.0136941	0.200134	Plbd1	protein_coding
ENSMUSG00000029591	94.7649	-0.482222	0.195783	-2.46304	0.0137766	0.200134	Ung	protein_coding
ENSMUSG00000026688	1481.83	-0.198942	0.0806997	-2.46522	0.0136929	0.200134	Mgst3	protein_coding
ENSMUSG00000006932	3273.63	0.186078	0.0755107	2.46426	0.0137296	0.200134	Ctnnb1	protein_coding
ENSMUSG00000035623	318.451	0.26343	0.10691	2.46405	0.0137377	0.200134	Rsf1	protein_coding
ENSMUSG00000036499	848.824	0.309306	0.125491	2.46477	0.0137101	0.200134	Eea1	protein_coding
ENSMUSG00000032740	102.646	0.558934	0.226923	2.4631	0.0137741	0.200134	Ccdc88a	protein_coding
ENSMUSG00000037712	5067.01	0.113621	0.0461531	2.46182	0.0138233	0.200519	Fermt2	protein_coding
ENSMUSG00000039197	1361.89	-0.242441	0.0985015	-2.46129	0.0138439	0.200524	Adk	protein_coding
ENSMUSG00000064337	90089.6	-0.0986307	0.040101	-2.45956	0.0139108	0.200904	mt-Rnr1	Mt_rRNA
ENSMUSG00000031286	113.115	-0.414331	0.168445	-2.45974	0.0139036	0.200904	Glt28d2	protein_coding
ENSMUSG00000025420	90.4126	-0.608119	0.247417	-2.45787	0.0139764	0.201557	Katnal2	protein_coding
ENSMUSG00000028883	81.2563	0.644461	0.262367	2.45633	0.0140363	0.202126	Sema3a	protein_coding
ENSMUSG00000016253	229.342	-0.339049	0.138067	-2.45568	0.0140617	0.202199	Nelfcd	protein_coding
ENSMUSG00000097431	184.319	0.300067	0.122349	2.45255	0.0141847	0.203671	Gm26782	lncRNA
ENSMUSG00000019470	172.627	-0.295088	0.120371	-2.4515	0.0142264	0.203678	Xab2	protein_coding
ENSMUSG00000002778	750.508	0.166724	0.0679973	2.45193	0.0142093	0.203678	Kdelr1	protein_coding
ENSMUSG00000030087	558.965	-0.27333	0.111739	-2.44616	0.0144388	0.204646	Klf15	protein_coding
ENSMUSG00000059208	827.648	0.294936	0.120514	2.44732	0.0143922	0.204646	Hnrnpm	protein_coding
ENSMUSG00000027288	28551.2	0.295262	0.120695	2.44635	0.0144312	0.204646	Zfp106	protein_coding
ENSMUSG00000015882	165.126	0.301119	0.123018	2.44776	0.0143748	0.204646	Lcorl	protein_coding
ENSMUSG00000057003	679822	0.336559	0.137477	2.44811	0.0143609	0.204646	Myh4	protein_coding
ENSMUSG00000045932	84.2611	0.428612	0.17506	2.44837	0.0143503	0.204646	Ifit2	protein_coding
ENSMUSG00000027022	31246.9	1.00909	0.41247	2.44646	0.0144265	0.204646	Xirp2	protein_coding
ENSMUSG00000024789	1399.86	0.248088	0.101495	2.44434	0.0145117	0.205385	Jak2	protein_coding
ENSMUSG00000112302	201.552	-0.375115	0.153523	-2.44337	0.0145507	0.205433	Gm48226	lncRNA
ENSMUSG00000029685	1928.84	-0.386915	0.158582	-2.43984	0.0146938	0.205433	Asb15	protein_coding
ENSMUSG00000035105	913.471	-0.321532	0.131692	-2.44154	0.0146248	0.205433	Egln3	protein_coding
ENSMUSG00000026342	379.604	-0.298151	0.122075	-2.44237	0.0145912	0.205433	Slc35f5	protein_coding
ENSMUSG00000040112	300.149	-0.249512	0.102263	-2.43989	0.0146917	0.205433	Mrps35	protein_coding
ENSMUSG00000049091	373.602	-0.227503	0.0931268	-2.44294	0.0145683	0.205433	Sephs2	protein_coding
ENSMUSG00000025702	639.877	-0.196814	0.0806915	-2.4391	0.0147241	0.205433	Marchf8	protein_coding
ENSMUSG00000018547	1236.3	-0.173137	0.0709939	-2.43876	0.0147376	0.205433	Pip4k2b	protein_coding
ENSMUSG00000017119	1375.55	0.207725	0.08518	2.43865	0.0147421	0.205433	Nbr1	protein_coding
ENSMUSG00000021022	320.968	0.282291	0.115759	2.43862	0.0147435	0.205433	Ppp2r3c	protein_coding
ENSMUSG00000022490	559.337	0.472085	0.193531	2.43933	0.0147147	0.205433	Ppp1r1a	protein_coding
ENSMUSG00000032050	4553.68	0.213134	0.087428	2.43782	0.0147762	0.205599	Rdx	protein_coding
ENSMUSG00000070544	1010.78	0.287329	0.117906	2.43693	0.0148127	0.205817	Top1	protein_coding
ENSMUSG00000032643	1363.88	-0.261045	0.107143	-2.43642	0.0148336	0.205819	Fhl3	protein_coding
ENSMUSG00000016382	417.205	0.376523	0.154589	2.43564	0.0148655	0.205972	Pls3	protein_coding
ENSMUSG00000028081	1708.65	0.27817	0.114308	2.43352	0.0149529	0.206894	Rps3a1	protein_coding
ENSMUSG00000040296	94.3369	0.470236	0.193347	2.43208	0.0150124	0.207427	Rigi	protein_coding
ENSMUSG00000040018	573.23	-0.261655	0.107663	-2.4303	0.0150862	0.207576	Cox15	protein_coding
ENSMUSG00000040359	657.156	0.212533	0.0874353	2.43074	0.0150678	0.207576	Ufl1	protein_coding
ENSMUSG00000039115	131.325	0.355243	0.146164	2.43044	0.0150804	0.207576	Itga9	protein_coding
ENSMUSG00000084843	367.294	1.1599	0.47738	2.42973	0.0151102	0.207618	B230312C02Rik	lncRNA
ENSMUSG00000038267	255.088	-0.422834	0.1741	-2.42868	0.0151539	0.207722	Slc22a23	protein_coding
ENSMUSG00000020570	3760.97	-0.230438	0.0948875	-2.42854	0.0151597	0.207722	Sypl1	protein_coding
ENSMUSG00000078716	316.713	-0.298172	0.122837	-2.42739	0.015208	0.208095	Tmem8b	protein_coding
ENSMUSG00000029432	10209.9	-0.16438	0.067767	-2.42567	0.0152803	0.208795	Nipsnap2	protein_coding
ENSMUSG00000048371	104.934	-0.614343	0.253324	-2.42512	0.0153032	0.20882	Pdp2	protein_coding
ENSMUSG00000036707	4180.1	-0.151993	0.0627133	-2.42361	0.0153669	0.20934	Cab39	protein_coding
ENSMUSG00000026083	1417.48	0.352922	0.145642	2.42322	0.0153836	0.20934	Eif5b	protein_coding
ENSMUSG00000045246	511.895	-0.32772	0.135464	-2.41924	0.015553	0.209709	Kcng4	protein_coding
ENSMUSG00000029632	7413.71	-0.229741	0.094946	-2.4197	0.0155331	0.209709	Ndufa4	protein_coding
ENSMUSG00000021051	1193.42	-0.167446	0.0691996	-2.41975	0.0155312	0.209709	Ppp2r5e	protein_coding
ENSMUSG00000000631	3177.2	0.179315	0.0740733	2.42078	0.0154872	0.209709	Myo18a	protein_coding
ENSMUSG00000029860	260.765	0.321647	0.132925	2.41977	0.0155304	0.209709	Zyx	protein_coding
ENSMUSG00000031631	304.27	0.359135	0.148338	2.42106	0.0154754	0.209709	Cfap97	protein_coding
ENSMUSG00000018417	295.107	0.438541	0.181283	2.4191	0.0155591	0.209709	Myo1b	protein_coding
ENSMUSG00000032002	1222.87	-0.236459	0.0977893	-2.41805	0.015604	0.209742	Dcun1d5	protein_coding
ENSMUSG00000026743	309.371	-0.229277	0.0948084	-2.41832	0.0155925	0.209742	Mllt10	protein_coding
ENSMUSG00000047675	1538.11	0.22988	0.0952083	2.4145	0.015757	0.211512	Rps8	protein_coding
ENSMUSG00000030546	60.4687	2.30423	0.955562	2.41139	0.0158919	0.213033	Plin1	protein_coding
ENSMUSG00000020105	75.7223	-0.424902	0.176273	-2.41048	0.0159315	0.213275	Lrig3	protein_coding
ENSMUSG00000021488	1341.7	0.189839	0.0788389	2.40794	0.0160429	0.214476	Nsd1	protein_coding
ENSMUSG00000030319	2113.12	-0.191136	0.0794228	-2.40657	0.0161033	0.214993	Cand2	protein_coding
ENSMUSG00000018501	2919.38	0.165158	0.0686856	2.40455	0.0161923	0.215468	Ncor1	protein_coding
ENSMUSG00000032423	1482.93	0.186281	0.077496	2.40375	0.0162279	0.215468	Syncrip	protein_coding
ENSMUSG00000029614	1060.07	0.215303	0.0895862	2.4033	0.0162478	0.215468	Rpl6	protein_coding
ENSMUSG00000004535	1229.08	0.290402	0.120787	2.40424	0.0162059	0.215468	Tax1bp1	protein_coding
ENSMUSG00000039756	394.467	0.383059	0.159282	2.40491	0.0161765	0.215468	Dnttip2	protein_coding
ENSMUSG00000032905	673.39	-0.238008	0.0990643	-2.40256	0.0162807	0.215615	Atg12	protein_coding
ENSMUSG00000028576	129.773	0.417823	0.174114	2.39971	0.0164081	0.217012	Ift74	protein_coding
ENSMUSG00000021427	1374.05	0.149826	0.0624634	2.39862	0.016457	0.217164	Ssr1	protein_coding
ENSMUSG00000022035	344.708	0.360532	0.150338	2.39815	0.0164782	0.217164	Ccdc25	protein_coding
ENSMUSG00000027559	7209.2	1.05879	0.441532	2.39799	0.0164854	0.217164	Car3	protein_coding
ENSMUSG00000024940	487.398	0.214977	0.0896734	2.39733	0.016515	0.217264	Ltbp3	protein_coding
ENSMUSG00000028099	430.922	-0.198519	0.08286	-2.39584	0.0165825	0.217863	Polr3c	protein_coding
ENSMUSG00000029686	1644.83	0.183266	0.0765288	2.39474	0.0166322	0.217938	Cul1	protein_coding
ENSMUSG00000078622	1881.14	0.228799	0.0955312	2.39502	0.0166195	0.217938	Ccdc47	protein_coding
ENSMUSG00000020572	3591.76	-0.226104	0.0945148	-2.39226	0.0167448	0.218782	Nampt	protein_coding
ENSMUSG00000021102	575.778	-0.196935	0.0823288	-2.39205	0.0167546	0.218782	Glrx5	protein_coding
ENSMUSG00000026915	479.763	0.275583	0.115252	2.39113	0.0167967	0.218782	Strbp	protein_coding
ENSMUSG00000033955	214.743	0.297761	0.124539	2.3909	0.0168073	0.218782	Tnks1bp1	protein_coding
ENSMUSG00000029086	77.7454	0.464685	0.194349	2.39099	0.0168032	0.218782	Prom1	protein_coding
ENSMUSG00000038170	61028	0.0914075	0.0382612	2.38904	0.0168925	0.219602	Pde4dip	protein_coding
ENSMUSG00000096054	1006.62	0.22572	0.0947132	2.38319	0.0171633	0.22283	Syne1	protein_coding
ENSMUSG00000031438	314.5	-0.32833	0.13781	-2.38247	0.0171967	0.222971	Rnf128	protein_coding
ENSMUSG00000061130	1239.3	-0.264918	0.111322	-2.37976	0.0173242	0.223912	Ppm1b	protein_coding
ENSMUSG00000027602	1569.92	-0.216502	0.0909832	-2.37959	0.0173321	0.223912	Map1lc3a	protein_coding
ENSMUSG00000022848	1209.44	-0.190324	0.0799886	-2.37938	0.0173417	0.223912	Slc49a4	protein_coding
ENSMUSG00000036437	76.7588	0.424086	0.178262	2.379	0.0173598	0.223912	Npy1r	protein_coding
ENSMUSG00000026643	183.563	0.344086	0.144775	2.37669	0.0174688	0.224732	Nmt2	protein_coding
ENSMUSG00000075702	81.4248	0.464154	0.195286	2.37679	0.0174642	0.224732	Selenom	protein_coding
ENSMUSG00000081194	238.926	0.576173	0.242514	2.37584	0.0175091	0.224958	Gm8424	processed_pseudogene
ENSMUSG00000021703	101.971	0.434385	0.182962	2.37419	0.0175877	0.225674	Serinc5	protein_coding
ENSMUSG00000033590	165.637	0.368285	0.155366	2.37043	0.0177674	0.227685	Myo5c	protein_coding
ENSMUSG00000020708	1382.1	0.139964	0.0590889	2.36871	0.0178503	0.227862	Psmc5	protein_coding
ENSMUSG00000027708	671.977	0.207241	0.087457	2.36964	0.0178056	0.227862	Dcun1d1	protein_coding
ENSMUSG00000043411	341.835	0.439362	0.185459	2.36905	0.0178337	0.227862	Usp48	protein_coding
ENSMUSG00000141782	379.341	0.340062	0.143662	2.36709	0.0179286	0.228503	ENSMUSG00000141782	lncRNA
ENSMUSG00000020283	383.713	-0.231865	0.097969	-2.36672	0.0179467	0.228503	Pex13	protein_coding
ENSMUSG00000097145	62.6865	0.629667	0.266126	2.36605	0.0179789	0.228619	9230114K14Rik	lncRNA
ENSMUSG00000006818	5261.39	-0.157097	0.0664352	-2.36467	0.0180461	0.228884	Sod2	protein_coding
ENSMUSG00000038366	336.001	0.325256	0.137539	2.36482	0.0180387	0.228884	Lasp1	protein_coding
ENSMUSG00000070056	80.0458	-0.432327	0.182913	-2.36357	0.0180998	0.228978	Mfhas1	protein_coding
ENSMUSG00000032386	313.858	0.319068	0.134969	2.364	0.0180787	0.228978	Trip4	protein_coding
ENSMUSG00000065460	115.519	0.368044	0.15582	2.36198	0.0181774	0.229022	Mir133a-2	miRNA
ENSMUSG00000005683	13887.3	-0.210016	0.0889469	-2.36114	0.018219	0.229022	Cs	protein_coding
ENSMUSG00000042529	825.35	-0.167051	0.070737	-2.36158	0.0181972	0.229022	Kcnj12	protein_coding
ENSMUSG00000026814	667.42	0.263164	0.111409	2.36214	0.0181697	0.229022	Eng	protein_coding
ENSMUSG00000060429	61.2312	0.636925	0.269653	2.36202	0.0181758	0.229022	Sntb1	protein_coding
ENSMUSG00000108621	333.785	0.298198	0.126458	2.35808	0.0183696	0.230622	Gm33989	lncRNA
ENSMUSG00000066900	1311.43	-0.204705	0.0868796	-2.3562	0.0184631	0.23121	Suds3	protein_coding
ENSMUSG00000020863	772.681	0.3154	0.133844	2.35648	0.0184492	0.23121	Luc7l3	protein_coding
ENSMUSG00000036617	2055.93	-0.280835	0.119249	-2.35504	0.0185209	0.231416	Etl4	protein_coding
ENSMUSG00000001472	2265.48	0.137955	0.0585932	2.35446	0.0185497	0.231416	Tcf25	protein_coding
ENSMUSG00000021982	547.877	0.219108	0.0930532	2.35465	0.01854	0.231416	Cdadc1	protein_coding
ENSMUSG00000041236	807.182	0.298161	0.126678	2.35369	0.0185881	0.231602	Vps41	protein_coding
ENSMUSG00000022639	62.0384	0.558242	0.237444	2.35105	0.0187205	0.232537	Dubr	lncRNA
ENSMUSG00000039611	344.972	-0.280834	0.119469	-2.35068	0.0187392	0.232537	Pgap4	protein_coding
ENSMUSG00000010277	9429.96	0.187536	0.0797918	2.35032	0.0187572	0.232537	Bltp2	protein_coding
ENSMUSG00000042473	143.915	0.33484	0.14245	2.35057	0.0187447	0.232537	Tbc1d8b	protein_coding
ENSMUSG00000032370	327.059	-0.226256	0.0963334	-2.34868	0.0188402	0.232982	Lactb	protein_coding
ENSMUSG00000035093	636.919	0.412297	0.175514	2.34908	0.0188197	0.232982	Secisbp2l	protein_coding
ENSMUSG00000022383	254.942	-0.407376	0.173509	-2.34786	0.0188814	0.233201	Ppara	protein_coding
ENSMUSG00000047284	376.845	-0.242206	0.103306	-2.34454	0.0190505	0.234995	Neurl4	protein_coding
ENSMUSG00000004383	393.165	-0.280831	0.11987	-2.34281	0.0191393	0.235104	Large1	protein_coding
ENSMUSG00000021635	358.009	-0.260588	0.111243	-2.34251	0.0191543	0.235104	Rad17	protein_coding
ENSMUSG00000061462	26496.4	-0.214027	0.0913419	-2.34314	0.0191221	0.235104	Obscn	protein_coding
ENSMUSG00000020792	820.504	0.179674	0.0766716	2.34342	0.0191079	0.235104	Exoc7	protein_coding
ENSMUSG00000021327	307.312	0.245014	0.104615	2.34205	0.0191781	0.235104	Zkscan3	protein_coding
ENSMUSG00000028088	185.32	-0.294839	0.126025	-2.33953	0.019308	0.235374	Fmo5	protein_coding
ENSMUSG00000034295	1011.52	-0.16768	0.0716538	-2.34014	0.0192765	0.235374	Fhod3	protein_coding
ENSMUSG00000063273	1388.25	0.263689	0.112712	2.33949	0.0193099	0.235374	Naa15	protein_coding
ENSMUSG00000046753	255.482	0.330629	0.141234	2.34099	0.0192325	0.235374	Ccdc66	protein_coding
ENSMUSG00000031391	74.1379	0.558487	0.238739	2.33932	0.0193191	0.235374	L1cam	protein_coding
ENSMUSG00000028917	455.084	-0.233921	0.100129	-2.33619	0.0194816	0.236267	Plekhm2	protein_coding
ENSMUSG00000025651	7941.99	-0.207148	0.0886741	-2.33606	0.0194879	0.236267	Uqcrc1	protein_coding
ENSMUSG00000054648	332.992	0.300227	0.128451	2.33728	0.0194244	0.236267	Zfp869	protein_coding
ENSMUSG00000030264	186.904	0.352769	0.15101	2.33607	0.0194876	0.236267	Thumpd3	protein_coding
ENSMUSG00000057738	1303.18	0.373926	0.1601	2.33558	0.0195129	0.236281	Sptan1	protein_coding
ENSMUSG00000007097	27490.3	-0.130086	0.0557108	-2.33503	0.019542	0.236343	Atp1a2	protein_coding
ENSMUSG00000016831	1232.05	-0.203584	0.0872258	-2.33398	0.0195966	0.236426	Tox4	protein_coding
ENSMUSG00000005871	966.527	0.280688	0.120259	2.33403	0.0195941	0.236426	Apc	protein_coding
ENSMUSG00000026623	1175.97	-0.209364	0.0898048	-2.33133	0.0197362	0.237242	Lpgat1	protein_coding
ENSMUSG00000036572	229.525	0.38793	0.166382	2.33156	0.019724	0.237242	Upf3b	protein_coding
ENSMUSG00000022441	202.758	0.39667	0.1701	2.33197	0.0197021	0.237242	Efcab6	protein_coding
ENSMUSG00000025078	351.511	-0.227622	0.0977667	-2.32822	0.0199004	0.237819	Nhlrc2	protein_coding
ENSMUSG00000005534	2153.21	-0.183092	0.0785904	-2.3297	0.0198221	0.237819	Insr	protein_coding
ENSMUSG00000039105	835.579	0.205425	0.0882321	2.32824	0.0198995	0.237819	Atp6v1g1	protein_coding
ENSMUSG00000026313	1250.04	0.288376	0.12388	2.32788	0.0199187	0.237819	Hdac4	protein_coding
ENSMUSG00000021392	167.808	0.379265	0.162936	2.32769	0.0199284	0.237819	Nol8	protein_coding
ENSMUSG00000024079	63.7698	0.500114	0.214849	2.32775	0.0199255	0.237819	Eif2ak2	protein_coding
ENSMUSG00000030452	759.746	-0.276551	0.11886	-2.32669	0.0199818	0.238169	Nipa2	protein_coding
ENSMUSG00000051456	389.333	0.219105	0.0942111	2.32568	0.0200354	0.23852	Hspb3	protein_coding
ENSMUSG00000026853	8027.69	-0.151182	0.0650241	-2.32502	0.0200708	0.238655	Crat	protein_coding
ENSMUSG00000042043	252.42	-0.28262	0.121661	-2.32302	0.0201783	0.238784	Tbca	protein_coding
ENSMUSG00000032604	997.15	0.154252	0.0663651	2.32429	0.0201098	0.238784	Qars1	protein_coding
ENSMUSG00000025609	1764.86	0.178885	0.0769926	2.32341	0.0201572	0.238784	Mkln1	protein_coding
ENSMUSG00000030056	331.185	0.206627	0.0889403	2.32321	0.0201681	0.238784	Isy1	protein_coding
ENSMUSG00000074807	332.957	-0.25968	0.11191	-2.32045	0.0203166	0.239083	Gm10762	lncRNA
ENSMUSG00000020277	65.5367	-0.447332	0.192875	-2.31929	0.0203795	0.239083	Pfkl	protein_coding
ENSMUSG00000022546	192.449	-0.305945	0.131962	-2.31843	0.0204259	0.239083	Gpt	protein_coding
ENSMUSG00000032051	410.98	-0.243786	0.105112	-2.31931	0.0203785	0.239083	Fdx1	protein_coding
ENSMUSG00000042404	1722.39	-0.167478	0.0722314	-2.31863	0.0204153	0.239083	Dennd4b	protein_coding
ENSMUSG00000020720	1867.83	0.218921	0.094333	2.32072	0.0203019	0.239083	Psmd12	protein_coding
ENSMUSG00000026031	575.641	0.297738	0.128321	2.32025	0.0203273	0.239083	Cflar	protein_coding
ENSMUSG00000024081	422.346	0.343707	0.148272	2.31808	0.0204452	0.239083	Cebpz	protein_coding
ENSMUSG00000031245	97.2372	0.399888	0.172453	2.31882	0.0204047	0.239083	Hmgn5	protein_coding
ENSMUSG00000025479	255.535	1.71717	0.739585	2.32181	0.0202434	0.239083	Cyp2e1	protein_coding
ENSMUSG00000078812	2540.31	0.122695	0.05294	2.31763	0.0204695	0.239085	Eif5a	protein_coding
ENSMUSG00000010608	1036.99	0.206049	0.0889358	2.31682	0.0205133	0.239314	Rbm25	protein_coding
ENSMUSG00000022438	969.351	-0.184046	0.0794758	-2.31575	0.020572	0.239715	Parvb	protein_coding
ENSMUSG00000053289	157.462	0.332798	0.143774	2.31472	0.0206281	0.240086	Ddx10	protein_coding
ENSMUSG00000040667	688.212	-0.201233	0.0869652	-2.31395	0.0206706	0.240299	Nup88	protein_coding
ENSMUSG00000029500	465.389	-0.19987	0.0864766	-2.31127	0.0208182	0.24173	Pgam5	protein_coding
ENSMUSG00000058351	160.093	-0.361034	0.156501	-2.30691	0.0210597	0.243356	Uqcc5	protein_coding
ENSMUSG00000030157	467.841	-0.334638	0.145043	-2.30717	0.0210455	0.243356	Clec2d	protein_coding
ENSMUSG00000025245	351.213	0.286208	0.124055	2.30709	0.0210496	0.243356	Lztfl1	protein_coding
ENSMUSG00000062619	208.288	0.320871	0.139091	2.30691	0.0210596	0.243356	2310039H08Rik	protein_coding
ENSMUSG00000105176	238.26	0.341071	0.147872	2.30653	0.0210812	0.243356	Gm43668	TEC
ENSMUSG00000030730	520630	0.325226	0.141131	2.30443	0.0211987	0.244427	Atp2a1	protein_coding
ENSMUSG00000015672	549.567	-0.281663	0.122309	-2.30287	0.021286	0.244578	Mrpl32	protein_coding
ENSMUSG00000024276	459.851	0.230074	0.0998937	2.30319	0.021268	0.244578	Zfp397	protein_coding
ENSMUSG00000018585	243.736	0.258314	0.11213	2.3037	0.0212397	0.244578	Atox1	protein_coding
ENSMUSG00000034088	8314.36	0.248235	0.107852	2.30163	0.0213562	0.245101	Hdlbp	protein_coding
ENSMUSG00000047793	191.428	0.479594	0.208428	2.30101	0.0213913	0.245219	Sned1	protein_coding
ENSMUSG00000026888	497.861	-0.557907	0.242515	-2.30051	0.0214193	0.245256	Grb14	protein_coding
ENSMUSG00000059149	147.718	-0.365135	0.158783	-2.29958	0.0214719	0.245327	Mfsd4a	protein_coding
ENSMUSG00000020659	362.258	-0.268866	0.116944	-2.29909	0.0214999	0.245327	Cbll1	protein_coding
ENSMUSG00000042042	1804.29	-0.182328	0.0793021	-2.29916	0.0214958	0.245327	Csgalnact2	protein_coding
ENSMUSG00000049858	642.498	-0.224491	0.0977035	-2.29768	0.0215799	0.245759	Suox	protein_coding
ENSMUSG00000021245	335.749	0.289361	0.125943	2.29755	0.0215874	0.245759	Mlh3	protein_coding
ENSMUSG00000034271	67.9559	0.51435	0.223959	2.29663	0.02164	0.246074	Jdp2	protein_coding
ENSMUSG00000055013	505.073	-0.252562	0.110094	-2.29407	0.0217868	0.246609	Agap1	protein_coding
ENSMUSG00000029050	1136.07	0.149181	0.0650249	2.29421	0.0217784	0.246609	Ski	protein_coding
ENSMUSG00000068134	234.625	0.33642	0.14662	2.29451	0.0217614	0.246609	Zfp120	protein_coding
ENSMUSG00000023235	68.6971	0.532596	0.232141	2.29428	0.0217743	0.246609	Ccl25	protein_coding
ENSMUSG00000061086	195.605	0.339089	0.147864	2.29325	0.0218336	0.246857	Myl4	protein_coding
ENSMUSG00000032403	170.227	-0.388149	0.169412	-2.29116	0.0219541	0.247936	2300009A05Rik	protein_coding
ENSMUSG00000063253	418.598	0.201465	0.0879896	2.28965	0.0220417	0.248641	Scoc	protein_coding
ENSMUSG00000043284	525.145	-0.16809	0.0734513	-2.28846	0.0221107	0.249136	Tmem11	protein_coding
ENSMUSG00000044340	303.452	-0.236003	0.103155	-2.28785	0.0221462	0.249252	Phlpp1	protein_coding
ENSMUSG00000027879	477.745	-0.21804	0.0953726	-2.28619	0.0222433	0.25006	Sec22b	protein_coding
ENSMUSG00000032047	3653.66	-0.164109	0.0718134	-2.28521	0.0223004	0.250418	Acat1	protein_coding
ENSMUSG00000027854	503.97	0.215013	0.0942741	2.28073	0.0225646	0.253097	Sike1	protein_coding
ENSMUSG00000040987	68.9268	0.486661	0.213428	2.28021	0.0225955	0.253156	Mill2	protein_coding
ENSMUSG00000112280	214.632	0.373424	0.163851	2.27905	0.0226644	0.253641	A830082N09Rik	lncRNA
ENSMUSG00000074170	152.79	-0.388519	0.170671	-2.27641	0.0228212	0.255108	Plekhf1	protein_coding
ENSMUSG00000052298	623.826	-0.257729	0.113242	-2.27591	0.0228517	0.25516	Cdc42se2	protein_coding
ENSMUSG00000096929	101.78	0.364952	0.160469	2.27429	0.0229485	0.255588	A330023F24Rik	lncRNA
ENSMUSG00000020456	16992.8	-0.22506	0.0989719	-2.27398	0.0229675	0.255588	Ogdh	protein_coding
ENSMUSG00000040242	1617.75	-0.161951	0.071204	-2.27447	0.0229379	0.255588	Fgfr1op2	protein_coding
ENSMUSG00000025103	2580.25	-0.188951	0.0831243	-2.27311	0.0230197	0.255825	Btbd1	protein_coding
ENSMUSG00000079588	7114.6	-0.15384	0.0676886	-2.27276	0.0230405	0.255825	Tmem182	protein_coding
ENSMUSG00000051185	1195.71	-0.287027	0.126314	-2.27233	0.0230666	0.255828	Fam174a	protein_coding
ENSMUSG00000019577	12450.1	-1.16136	0.511226	-2.27172	0.0231036	0.25595	Pdk4	protein_coding
ENSMUSG00000060981	69.287	-0.57036	0.251316	-2.2695	0.0232381	0.257152	H4c8	protein_coding
ENSMUSG00000046818	4790.07	0.4614	0.203451	2.26786	0.0233375	0.257964	Ddit4l	protein_coding
ENSMUSG00000024122	1072.14	-0.184081	0.0812546	-2.26548	0.023483	0.258179	Pdpk1	protein_coding
ENSMUSG00000044018	849.609	-0.160203	0.0707169	-2.26541	0.0234874	0.258179	Mrpl50	protein_coding
ENSMUSG00000071415	1239.89	0.217186	0.0958661	2.26551	0.0234812	0.258179	Rpl23	protein_coding
ENSMUSG00000030782	90.3872	0.393005	0.173393	2.26656	0.0234172	0.258179	Tgfb1i1	protein_coding
ENSMUSG00000030064	170.063	0.39354	0.173701	2.26562	0.0234748	0.258179	Frmd4b	protein_coding
ENSMUSG00000032667	547.643	-0.218951	0.0966731	-2.26486	0.0235213	0.258264	Pon2	protein_coding
ENSMUSG00000046032	407.847	-0.283971	0.125533	-2.26211	0.0236904	0.259427	Snx12	protein_coding
ENSMUSG00000060301	342.192	0.336459	0.148744	2.262	0.0236976	0.259427	2610008E11Rik	protein_coding
ENSMUSG00000042625	126.202	0.379813	0.167952	2.26144	0.023732	0.259427	Safb2	protein_coding
ENSMUSG00000063060	147.101	0.427695	0.189093	2.26182	0.0237085	0.259427	Sox7	protein_coding
ENSMUSG00000015709	96.7554	0.421685	0.186511	2.26091	0.023765	0.2595	Arnt2	protein_coding
ENSMUSG00000025477	1544.39	0.191491	0.0847156	2.26039	0.0237968	0.259561	Inpp5a	protein_coding
ENSMUSG00000060510	412.417	0.220229	0.0974642	2.25959	0.0238469	0.259821	Zfp266	protein_coding
ENSMUSG00000022270	2986.35	-0.1986	0.0879324	-2.25856	0.0239109	0.260232	Retreg1	protein_coding
ENSMUSG00000059741	73.1264	-1.63438	0.724645	-2.25542	0.0241071	0.261295	Myl3	protein_coding
ENSMUSG00000031527	176.399	-0.296105	0.131304	-2.25512	0.0241261	0.261295	Eri1	protein_coding
ENSMUSG00000022663	475.674	-0.262631	0.116404	-2.25619	0.0240586	0.261295	Atg3	protein_coding
ENSMUSG00000060373	917.349	-0.214623	0.0951424	-2.2558	0.0240829	0.261295	Hnrnpc	protein_coding
ENSMUSG00000037608	1118.89	0.323756	0.14358	2.25488	0.0241407	0.261295	Bclaf1	protein_coding
ENSMUSG00000037742	2359.27	0.410525	0.182154	2.25373	0.0242134	0.261796	Eef1a1	protein_coding
ENSMUSG00000026113	261.767	-0.234569	0.104167	-2.25186	0.0243312	0.262782	Inpp4a	protein_coding
ENSMUSG00000043535	854.354	0.36193	0.160756	2.25143	0.0243585	0.26279	Setx	protein_coding
ENSMUSG00000021456	451.321	0.297657	0.132263	2.25049	0.0244182	0.263147	Fbp2	protein_coding
ENSMUSG00000013275	1324.67	-0.360432	0.160267	-2.24895	0.0245157	0.263894	Slc41a1	protein_coding
ENSMUSG00000028093	237.089	-0.264116	0.117461	-2.24854	0.0245417	0.263894	Acp6	protein_coding
ENSMUSG00000042050	210.381	0.331163	0.147311	2.24805	0.0245727	0.263894	Dync2i1	protein_coding
ENSMUSG00000028869	487.156	0.376196	0.167373	2.24765	0.0245982	0.263894	Gnl2	protein_coding
ENSMUSG00000016128	153.041	0.431082	0.191822	2.2473	0.0246208	0.263894	Stard13	protein_coding
ENSMUSG00000034042	426.921	-0.236827	0.105444	-2.24601	0.0247035	0.264493	Gpbp1l1	protein_coding
ENSMUSG00000042719	973.17	0.2262	0.100741	2.24535	0.0247454	0.264655	Naa25	protein_coding
ENSMUSG00000027300	141.364	-0.329053	0.146665	-2.24357	0.0248602	0.265152	Ubox5	protein_coding
ENSMUSG00000022742	578.76	-0.241678	0.107749	-2.24297	0.024899	0.265152	Cpox	protein_coding
ENSMUSG00000038967	7735.05	-0.149506	0.0666352	-2.24364	0.0248554	0.265152	Pdk2	protein_coding
ENSMUSG00000027223	83.2702	0.482041	0.214881	2.24329	0.0248781	0.265152	Mapk8ip1	protein_coding
ENSMUSG00000041115	219.35	-0.333874	0.148926	-2.24188	0.024969	0.265156	Iqsec2	protein_coding
ENSMUSG00000018339	3492.34	-0.282961	0.126231	-2.24162	0.0249862	0.265156	Gpx3	protein_coding
ENSMUSG00000037674	623.256	-0.236256	0.105356	-2.24245	0.0249324	0.265156	Rfx7	protein_coding
ENSMUSG00000034252	1029.76	0.169445	0.0756414	2.2401	0.0250842	0.265156	Senp6	protein_coding
ENSMUSG00000020650	952.235	0.18606	0.0830599	2.24007	0.0250861	0.265156	Bcap29	protein_coding
ENSMUSG00000029634	703.662	0.211494	0.0944143	2.24006	0.0250871	0.265156	Rnf6	protein_coding
ENSMUSG00000025213	106.27	0.443184	0.197842	2.24009	0.0250848	0.265156	Kazald1	protein_coding
ENSMUSG00000043090	179.954	0.349278	0.156008	2.23884	0.0251663	0.26571	Zfp866	protein_coding
ENSMUSG00000032033	107.237	-0.504808	0.225684	-2.2368	0.0252997	0.266833	Barx2	protein_coding
ENSMUSG00000029474	412	-0.246736	0.110368	-2.23557	0.0253799	0.267394	Rnf34	protein_coding
ENSMUSG00000061544	119.505	0.399847	0.178934	2.23461	0.0254427	0.267771	Zfp229	protein_coding
ENSMUSG00000019122	127.292	-0.703082	0.314859	-2.233	0.0255486	0.268358	Ccl9	protein_coding
ENSMUSG00000016018	630.699	0.285274	0.127757	2.23294	0.0255527	0.268358	Mtrex	protein_coding
ENSMUSG00000032398	339.951	0.246834	0.110568	2.23242	0.025587	0.268433	Snapc5	protein_coding
ENSMUSG00000063856	649.72	0.292953	0.131254	2.23196	0.0256176	0.26847	Gpx1	protein_coding
ENSMUSG00000098973	1949.09	0.367256	0.164587	2.23137	0.0256563	0.268482	Mir6236	miRNA
ENSMUSG00000042515	86.3753	0.388865	0.174291	2.23112	0.0256731	0.268482	Pwwp3b	protein_coding
ENSMUSG00000068329	102.714	-0.370056	0.165899	-2.2306	0.0257075	0.268558	Htra2	protein_coding
ENSMUSG00000030138	509.546	0.247701	0.111087	2.22979	0.0257616	0.268839	Bms1	protein_coding
ENSMUSG00000012422	536.718	-0.28393	0.127443	-2.2279	0.0258872	0.26957	Tmem167	protein_coding
ENSMUSG00000050697	544.39	-0.197954	0.0888679	-2.22751	0.0259134	0.26957	Prkaa1	protein_coding
ENSMUSG00000040724	61.5019	0.871639	0.391252	2.22782	0.0258925	0.26957	Kcna2	protein_coding
ENSMUSG00000018893	24488.6	-0.383261	0.172258	-2.22493	0.0260859	0.271079	Mb	protein_coding
ENSMUSG00000029545	518.246	-0.286156	0.128676	-2.22386	0.0261579	0.271543	Acads	protein_coding
ENSMUSG00000054452	6242.01	0.139932	0.0629675	2.22228	0.0262641	0.272359	Tle5	protein_coding
ENSMUSG00000030103	2091.03	-0.301194	0.135575	-2.2216	0.0263107	0.272409	Bhlhe40	protein_coding
ENSMUSG00000026864	3572.8	0.231063	0.104017	2.22138	0.026325	0.272409	Hspa5	protein_coding
ENSMUSG00000095115	281.094	0.240821	0.10843	2.22099	0.0263515	0.272409	Itpripl2	protein_coding
ENSMUSG00000063077	9663.2	0.191131	0.0860756	2.2205	0.0263851	0.272472	Kif1b	protein_coding
ENSMUSG00000020593	12176	-0.323184	0.145612	-2.21948	0.0264539	0.272897	Lpin1	protein_coding
ENSMUSG00000027206	2053.75	0.232995	0.105027	2.21843	0.0265254	0.273349	Cops2	protein_coding
ENSMUSG00000111162	106.905	-0.386247	0.174211	-2.21712	0.0266149	0.273987	Gm7293	processed_pseudogene
ENSMUSG00000033186	1310.81	-0.173703	0.0783874	-2.21595	0.0266947	0.274523	Mzt1	protein_coding
ENSMUSG00000012117	171.716	-0.264191	0.119271	-2.21504	0.026757	0.274878	Dhdds	protein_coding
ENSMUSG00000028776	311.35	0.283272	0.127921	2.21444	0.0267986	0.275019	Tinagl1	protein_coding
ENSMUSG00000040717	113.324	-0.347327	0.157036	-2.21177	0.0269824	0.276555	Il17rd	protein_coding
ENSMUSG00000000223	200.061	1.08314	0.489785	2.21146	0.0270042	0.276555	Drp2	protein_coding
ENSMUSG00000021748	3579.27	-0.144285	0.06527	-2.21058	0.0270647	0.276602	Pdhb	protein_coding
ENSMUSG00000031447	8712.23	-0.126062	0.0570201	-2.21083	0.0270476	0.276602	Lamp1	protein_coding
ENSMUSG00000066150	413.935	-0.205673	0.0930825	-2.20958	0.0271346	0.276854	Slc31a1	protein_coding
ENSMUSG00000048279	287.415	0.576979	0.261145	2.20942	0.0271453	0.276854	Sacs	protein_coding
ENSMUSG00000067274	4447.84	0.141952	0.0642739	2.20854	0.0272063	0.276905	Rplp0	protein_coding
ENSMUSG00000009575	1265.76	0.15224	0.0689213	2.20889	0.0271822	0.276905	Cbx5	protein_coding
ENSMUSG00000037013	209.064	0.245905	0.111453	2.20635	0.0273595	0.277976	Ss18	protein_coding
ENSMUSG00000022449	84.0093	0.513452	0.232728	2.20623	0.0273677	0.277976	Adamts20	protein_coding
ENSMUSG00000022358	5020.71	-0.297923	0.135073	-2.20565	0.0274087	0.278107	Fbxo32	protein_coding
ENSMUSG00000050244	269.586	0.331057	0.150131	2.20512	0.0274458	0.278198	Heatr1	protein_coding
ENSMUSG00000027809	2087.65	-0.200857	0.0911253	-2.20418	0.0275118	0.278582	Etfdh	protein_coding
ENSMUSG00000005802	738.311	-0.233395	0.105934	-2.20322	0.0275789	0.278976	Slc30a4	protein_coding
ENSMUSG00000021025	264.502	-0.345007	0.156679	-2.202	0.027665	0.279006	Nfkbia	protein_coding
ENSMUSG00000031958	497.317	-0.274276	0.124536	-2.20239	0.0276379	0.279006	Ldhd	protein_coding
ENSMUSG00000027806	905.302	-0.259043	0.117643	-2.20194	0.0276692	0.279006	Tsc22d2	protein_coding
ENSMUSG00000069833	4295.5	0.323527	0.146952	2.20158	0.0276948	0.279006	Ahnak	protein_coding
ENSMUSG00000021557	1364.06	0.207048	0.0940661	2.20109	0.0277299	0.279076	Agtpbp1	protein_coding
ENSMUSG00000034163	189.192	0.434806	0.197599	2.20045	0.0277747	0.279243	Zfc3h1	protein_coding
ENSMUSG00000042308	134.444	-0.318023	0.144595	-2.19941	0.0278491	0.279707	Setd1a	protein_coding
ENSMUSG00000000078	751.472	-0.254537	0.115802	-2.19804	0.0279463	0.280399	Klf6	protein_coding
ENSMUSG00000026275	615.686	0.271735	0.123651	2.19759	0.0279781	0.280433	Ppp1r7	protein_coding
ENSMUSG00000048833	255.028	-0.275952	0.125622	-2.1967	0.0280422	0.280791	Slc39a9	protein_coding
ENSMUSG00000096449	721.319	-0.283548	0.129133	-2.19578	0.0281076	0.280841	Gm4076	processed_pseudogene
ENSMUSG00000013936	284.618	-1.87157	0.852791	-2.19464	0.0281891	0.280841	Myl2	protein_coding
ENSMUSG00000032878	263.683	-0.402454	0.183253	-2.19617	0.0280801	0.280841	Ccdc85a	protein_coding
ENSMUSG00000028195	315.353	-0.358761	0.163445	-2.19499	0.028164	0.280841	Ccn1	protein_coding
ENSMUSG00000032212	354.237	0.291686	0.132877	2.19515	0.0281525	0.280841	Sltm	protein_coding
ENSMUSG00000007850	1780.51	0.220262	0.100467	2.19238	0.0283517	0.282177	Hnrnph1	protein_coding
ENSMUSG00000032135	262.403	0.296234	0.135274	2.18988	0.0285327	0.283692	Mcam	protein_coding
ENSMUSG00000073147	138.985	0.297809	0.136047	2.18901	0.0285961	0.284037	5031425E22Rik	lncRNA
ENSMUSG00000019791	553.282	-0.225696	0.103139	-2.18826	0.0286509	0.284296	Hint3	protein_coding
ENSMUSG00000021939	4842.25	-0.113491	0.051893	-2.18703	0.0287406	0.284901	Ctsb	protein_coding
ENSMUSG00000031878	549.526	0.212726	0.0972906	2.1865	0.0287789	0.284995	Nae1	protein_coding
ENSMUSG00000036054	471.494	-0.227667	0.104211	-2.18467	0.0289133	0.285184	Sugp2	protein_coding
ENSMUSG00000067722	316.185	-0.206048	0.0942831	-2.18542	0.028858	0.285184	Uqcc4	protein_coding
ENSMUSG00000026603	1677.19	0.234015	0.107068	2.18566	0.0288404	0.285184	Smyd2	protein_coding
ENSMUSG00000037965	254.034	0.327683	0.149978	2.18487	0.028898	0.285184	Zc3h7a	protein_coding
ENSMUSG00000041120	249.243	0.389306	0.17832	2.18319	0.0290221	0.285972	Nbl1	protein_coding
ENSMUSG00000079283	88.4272	-0.375421	0.17229	-2.179	0.0293313	0.286329	2310009B15Rik	protein_coding
ENSMUSG00000036977	107.409	-0.355855	0.163282	-2.17939	0.0293028	0.286329	Anapc10	protein_coding
ENSMUSG00000066637	349.066	-0.274282	0.12591	-2.17839	0.0293767	0.286329	Ttc32	protein_coding
ENSMUSG00000024533	233.864	-0.254773	0.11694	-2.17866	0.0293566	0.286329	Spire1	protein_coding
ENSMUSG00000028274	248.444	-0.243046	0.111534	-2.17911	0.0293233	0.286329	Rngtt	protein_coding
ENSMUSG00000042628	389.073	-0.241348	0.110741	-2.17939	0.0293026	0.286329	Zfyve1	protein_coding
ENSMUSG00000025509	2819.33	-0.174445	0.0800748	-2.17853	0.0293667	0.286329	Pnpla2	protein_coding
ENSMUSG00000041765	565.82	-0.171902	0.0788072	-2.1813	0.0291613	0.286329	Ubac2	protein_coding
ENSMUSG00000053641	111.909	0.40903	0.187699	2.17919	0.0293177	0.286329	Dennd4a	protein_coding
ENSMUSG00000039419	165.699	0.52517	0.240939	2.17968	0.0292812	0.286329	Cntnap2	protein_coding
ENSMUSG00000003948	104.224	0.652667	0.299226	2.18118	0.0291697	0.286329	Mmd	protein_coding
ENSMUSG00000020409	649.936	0.31985	0.146864	2.17786	0.0294168	0.286437	Slu7	protein_coding
ENSMUSG00000058254	1371.98	-0.203218	0.0933658	-2.17658	0.0295123	0.287084	Tspan7	protein_coding
ENSMUSG00000049751	146.101	0.361473	0.16616	2.17545	0.0295964	0.28762	Rpl36al	protein_coding
ENSMUSG00000048416	2383.81	-0.271023	0.124702	-2.17337	0.0297525	0.287724	Mlf1	protein_coding
ENSMUSG00000034636	3200.41	-0.180473	0.0830136	-2.17401	0.0297042	0.287724	Zyg11b	protein_coding
ENSMUSG00000001794	2941.12	0.102329	0.0470813	2.17346	0.0297458	0.287724	Capns1	protein_coding
ENSMUSG00000015932	670.453	0.256315	0.117885	2.17427	0.0296846	0.287724	Dstn	protein_coding
ENSMUSG00000048410	135.092	0.380627	0.175051	2.17438	0.029677	0.287724	Zfp407	protein_coding
ENSMUSG00000014313	7273.97	-0.174138	0.0802017	-2.17125	0.0299126	0.288989	Cox6c	protein_coding
ENSMUSG00000022884	4883.29	0.187093	0.0861844	2.17085	0.0299426	0.288997	Eif4a2	protein_coding
ENSMUSG00000025421	1178.4	-0.145969	0.0672958	-2.16906	0.0300782	0.290023	Hdhd2	protein_coding
ENSMUSG00000022008	356.89	-0.216817	0.0999956	-2.16827	0.0301384	0.290038	Gpalpp1	protein_coding
ENSMUSG00000042460	1149.72	-0.215178	0.0992357	-2.16836	0.0301316	0.290038	C1galt1	protein_coding
ENSMUSG00000021962	188.198	-0.28529	0.131643	-2.16716	0.030223	0.290569	Dcp1a	protein_coding
ENSMUSG00000029397	558.725	-0.169357	0.0782629	-2.16395	0.0304681	0.292641	Rchy1	protein_coding
ENSMUSG00000013662	1971.58	-0.154983	0.0716507	-2.16303	0.0305389	0.292753	Atad1	protein_coding
ENSMUSG00000004105	1297	0.194193	0.0897755	2.1631	0.0305337	0.292753	Angptl2	protein_coding
ENSMUSG00000038705	142.848	-0.293043	0.135573	-2.16152	0.0306556	0.29302	Gmeb2	protein_coding
ENSMUSG00000043079	2289.37	-0.160586	0.0742842	-2.16178	0.0306351	0.29302	Synpo	protein_coding
ENSMUSG00000038587	303.471	0.370405	0.171328	2.16197	0.0306208	0.29302	Akap12	protein_coding
ENSMUSG00000029598	432.487	-0.274077	0.126836	-2.16089	0.030704	0.2932	Plbd2	protein_coding
ENSMUSG00000022094	210.998	-0.281025	0.130098	-2.16009	0.0307655	0.293221	Slc39a14	protein_coding
ENSMUSG00000002064	419.785	0.193524	0.0895829	2.16027	0.0307514	0.293221	Sdf2	protein_coding
ENSMUSG00000027534	191.883	-0.300049	0.139036	-2.15806	0.030923	0.293872	Snx16	protein_coding
ENSMUSG00000075470	1164.27	-0.217273	0.100674	-2.15818	0.0309139	0.293872	Alg10b	protein_coding
ENSMUSG00000038774	368.21	0.212514	0.0984577	2.15843	0.0308946	0.293872	Ascc3	protein_coding
ENSMUSG00000048439	97.1501	-0.401774	0.186253	-2.15714	0.0309951	0.293993	Nup42	protein_coding
ENSMUSG00000035049	620.864	-0.176593	0.0818607	-2.15724	0.0309867	0.293993	Rrp12	protein_coding
ENSMUSG00000024962	1481.91	-0.24525	0.113789	-2.1553	0.0311385	0.294225	Vegfb	protein_coding
ENSMUSG00000039640	1076.1	-0.208036	0.0965158	-2.15546	0.0311257	0.294225	Mrpl12	protein_coding
ENSMUSG00000027984	2612.62	-0.186739	0.0866042	-2.15624	0.0310649	0.294225	Hadh	protein_coding
ENSMUSG00000019726	140.669	0.354248	0.164353	2.15541	0.0311296	0.294225	Lyst	protein_coding
ENSMUSG00000040998	121.285	-0.437571	0.203309	-2.15224	0.0313782	0.295284	Npnt	protein_coding
ENSMUSG00000032816	554.375	-0.231664	0.107598	-2.15306	0.0313141	0.295284	Igdcc4	protein_coding
ENSMUSG00000041801	1630.47	-0.164103	0.0762572	-2.15197	0.0313999	0.295284	Phlda3	protein_coding
ENSMUSG00000041258	356.038	0.260643	0.121047	2.15324	0.0313	0.295284	Zfp236	protein_coding
ENSMUSG00000020640	577.4	0.280086	0.130141	2.15218	0.0313835	0.295284	Itsn2	protein_coding
ENSMUSG00000025648	641.861	0.255421	0.11874	2.15109	0.0314695	0.295658	Pfkfb4	protein_coding
ENSMUSG00000097415	135.076	0.297488	0.138334	2.15051	0.0315151	0.295701	AU020206	lncRNA
ENSMUSG00000019082	131.496	-0.49038	0.228058	-2.15025	0.0315358	0.295701	Slc25a22	protein_coding
ENSMUSG00000024960	201.228	0.245003	0.113961	2.14989	0.0315638	0.295701	Plcb3	protein_coding
ENSMUSG00000053768	5021.04	-0.158912	0.0739434	-2.14911	0.0316257	0.296001	Chchd3	protein_coding
ENSMUSG00000028793	287.321	-0.238655	0.111091	-2.14828	0.0316912	0.296054	Rnf19b	protein_coding
ENSMUSG00000024132	1157.46	-0.231839	0.10791	-2.14844	0.0316788	0.296054	Eci1	protein_coding
ENSMUSG00000002546	1022.63	0.13611	0.063393	2.14708	0.0317865	0.296106	Golga2	protein_coding
ENSMUSG00000025616	901.055	0.272838	0.127072	2.14711	0.0317843	0.296106	Usp16	protein_coding
ENSMUSG00000031799	786.188	0.280606	0.130684	2.14721	0.0317767	0.296106	Tpm4	protein_coding
ENSMUSG00000036214	185.773	0.339884	0.158338	2.14657	0.0318276	0.296209	Polr1has	protein_coding
ENSMUSG00000025204	782.434	-0.168315	0.0784792	-2.14471	0.0319759	0.297309	Ndufb8	protein_coding
ENSMUSG00000064225	168.212	-0.446164	0.208183	-2.14314	0.0321021	0.298203	Paqr9	protein_coding
ENSMUSG00000024483	546.142	0.224497	0.104816	2.14183	0.0322069	0.298896	Ankhd1	protein_coding
ENSMUSG00000025451	985.109	-0.1965	0.0918652	-2.13901	0.0324352	0.300701	Paip1	protein_coding
ENSMUSG00000061665	367.298	0.201607	0.0942672	2.13867	0.0324622	0.300701	Cd2ap	protein_coding
ENSMUSG00000021903	499.502	-0.346942	0.162462	-2.13553	0.0327179	0.302786	Galnt15	protein_coding
ENSMUSG00000033083	355.086	-0.429512	0.201251	-2.13421	0.0328254	0.303214	Tbc1d4	protein_coding
ENSMUSG00000046351	219.317	0.268429	0.125771	2.13426	0.0328212	0.303214	Zfp322a	protein_coding
ENSMUSG00000027016	191.973	-0.71992	0.337443	-2.13345	0.0328875	0.303292	Zfp385b	protein_coding
ENSMUSG00000026062	753.408	-0.275657	0.129228	-2.13311	0.0329158	0.303292	Slc9a2	protein_coding
ENSMUSG00000021273	762.42	-0.272904	0.127992	-2.1322	0.0329903	0.303292	Fdft1	protein_coding
ENSMUSG00000038201	367.814	-0.247599	0.11615	-2.13172	0.0330296	0.303292	Kcna7	protein_coding
ENSMUSG00000034203	239.711	-0.240218	0.1127	-2.13149	0.0330485	0.303292	Chchd4	protein_coding
ENSMUSG00000028745	4772.41	0.137229	0.0643652	2.13204	0.0330039	0.303292	Capzb	protein_coding
ENSMUSG00000039449	791.7	0.187059	0.0877261	2.13231	0.0329817	0.303292	Prpf18	protein_coding
ENSMUSG00000042579	93.2758	-0.433973	0.203825	-2.12915	0.0332421	0.304094	4632404H12Rik	lncRNA
ENSMUSG00000024735	1878.96	0.140295	0.0659105	2.12857	0.0332896	0.304094	Prpf19	protein_coding
ENSMUSG00000001962	245.215	0.338281	0.158886	2.12908	0.0332479	0.304094	Fam50a	protein_coding
ENSMUSG00000046230	822.197	0.353212	0.165916	2.12886	0.0332655	0.304094	Vps13a	protein_coding
ENSMUSG00000046111	207.32	0.399447	0.187608	2.12915	0.0332415	0.304094	Cep295	protein_coding
ENSMUSG00000051864	241.529	-0.224973	0.105767	-2.12706	0.0334151	0.30442	Tbc1d22a	protein_coding
ENSMUSG00000027999	910.679	-0.204987	0.0963478	-2.12757	0.0333725	0.30442	Pla2g12a	protein_coding
ENSMUSG00000002266	132.939	0.434139	0.204106	2.12703	0.0334176	0.30442	Zim1	protein_coding
ENSMUSG00000041895	1354.68	-0.144674	0.0680642	-2.12555	0.0335404	0.304892	Wipi1	protein_coding
ENSMUSG00000027710	314	0.207594	0.0976654	2.12557	0.0335395	0.304892	Acad9	protein_coding
ENSMUSG00000028495	531.02	0.275899	0.129817	2.1253	0.0335618	0.304892	Rps6	protein_coding
ENSMUSG00000028229	365.863	-0.300363	0.141483	-2.12296	0.0337572	0.304986	Rmdn1	protein_coding
ENSMUSG00000053470	256.592	-0.25947	0.122161	-2.12401	0.0336695	0.304986	Kdm3a	protein_coding
ENSMUSG00000025428	28659.9	-0.123045	0.0579508	-2.12328	0.0337308	0.304986	Atp5f1a	protein_coding
ENSMUSG00000021368	263.085	0.213689	0.100649	2.12312	0.0337441	0.304986	Tbc1d7	protein_coding
ENSMUSG00000027998	264.585	0.235842	0.111025	2.12423	0.0336513	0.304986	Plrg1	protein_coding
ENSMUSG00000075701	383.694	0.250655	0.118007	2.12406	0.033665	0.304986	Selenos	protein_coding
ENSMUSG00000098192	172.831	-0.312475	0.147369	-2.12036	0.0339756	0.306525	Gm3534	processed_pseudogene
ENSMUSG00000022860	224.081	-0.331226	0.156279	-2.11946	0.0340514	0.306525	Chodl	protein_coding
ENSMUSG00000024241	972.009	-0.238307	0.112424	-2.11971	0.0340301	0.306525	Sos1	protein_coding
ENSMUSG00000026896	129.19	0.312011	0.147176	2.11999	0.0340071	0.306525	Ifih1	protein_coding
ENSMUSG00000017493	585.593	0.41211	0.194506	2.11875	0.0341116	0.306787	Igfbp4	protein_coding
ENSMUSG00000041355	351.842	0.238459	0.112573	2.11825	0.0341539	0.306889	Ssr2	protein_coding
ENSMUSG00000038530	162.935	0.385229	0.182019	2.11642	0.034309	0.307724	Rgs4	protein_coding
ENSMUSG00000053931	445.741	0.411183	0.194251	2.11676	0.0342804	0.307724	Cnn3	protein_coding
ENSMUSG00000038522	95.5355	-0.356123	0.168329	-2.11564	0.0343754	0.30804	Mfsd4b1	protein_coding
ENSMUSG00000064347	69.3701	-0.585672	0.277106	-2.11353	0.0345556	0.308536	mt-Ta	Mt_tRNA
ENSMUSG00000082179	445.843	-0.278202	0.131608	-2.11387	0.0345265	0.308536	Gm11407	processed_pseudogene
ENSMUSG00000027447	7687.22	0.214912	0.101677	2.11368	0.0345424	0.308536	Cst3	protein_coding
ENSMUSG00000052609	116.571	0.300931	0.142352	2.11399	0.0345163	0.308536	Plekhg3	protein_coding
ENSMUSG00000022797	2667.41	0.278878	0.132026	2.1123	0.0346605	0.309195	Tfrc	protein_coding
ENSMUSG00000022272	1141.12	0.168252	0.0796674	2.11192	0.034693	0.309205	Myo10	protein_coding
ENSMUSG00000030787	150.009	-0.578934	0.274451	-2.10943	0.0349078	0.309212	Lyve1	protein_coding
ENSMUSG00000026283	89.3914	-0.344933	0.163543	-2.10913	0.0349335	0.309212	Ing5	protein_coding
ENSMUSG00000024436	425.308	-0.187436	0.0887877	-2.11106	0.0347672	0.309212	Mrps18b	protein_coding
ENSMUSG00000015023	389.799	-0.177702	0.0842165	-2.11006	0.0348528	0.309212	Ddx19a	protein_coding
ENSMUSG00000030934	3823.79	0.0943189	0.0447143	2.10937	0.0349127	0.309212	Oat	protein_coding
ENSMUSG00000063870	1385.79	0.197757	0.0937282	2.10989	0.0348676	0.309212	Chd4	protein_coding
ENSMUSG00000029176	515.923	0.214904	0.101783	2.1114	0.0347379	0.309212	Anapc4	protein_coding
ENSMUSG00000058318	274.62	0.271031	0.128511	2.10901	0.0349438	0.309212	Phf21a	protein_coding
ENSMUSG00000049878	232.307	0.263872	0.125155	2.10837	0.0349989	0.309423	Rlf	protein_coding
ENSMUSG00000022234	1760.17	0.174374	0.0827508	2.10722	0.0350987	0.310028	Cct5	protein_coding
ENSMUSG00000043153	58.4676	-0.489954	0.232711	-2.10542	0.0352551	0.310534	Crppa	protein_coding
ENSMUSG00000028899	590.438	0.162744	0.07732	2.10481	0.0353081	0.310534	Taf12	protein_coding
ENSMUSG00000030401	9496.89	0.170345	0.0809333	2.10475	0.035313	0.310534	Rtn2	protein_coding
ENSMUSG00000009079	631.773	0.213544	0.101429	2.10534	0.0352615	0.310534	Ewsr1	protein_coding
ENSMUSG00000000530	177.975	0.255712	0.121491	2.10479	0.0353099	0.310534	Acvrl1	protein_coding
ENSMUSG00000034460	569.795	-0.243357	0.115689	-2.10354	0.0354183	0.311184	Six4	protein_coding
ENSMUSG00000039911	116.451	-0.344702	0.163902	-2.1031	0.0354571	0.311249	Spsb1	protein_coding
ENSMUSG00000057530	1635.83	0.232114	0.11042	2.10211	0.0355436	0.311731	Ece1	protein_coding
ENSMUSG00000032867	339.902	-0.192755	0.0917467	-2.10095	0.0356455	0.312348	Fbxw8	protein_coding
ENSMUSG00000028464	110227	-0.185114	0.0883404	-2.09547	0.0361295	0.313531	Tpm2	protein_coding
ENSMUSG00000024614	780.916	-0.155067	0.0739603	-2.09663	0.0360268	0.313531	Tmx3	protein_coding
ENSMUSG00000026112	3933.46	-0.142054	0.0678138	-2.09476	0.0361925	0.313531	Coa5	protein_coding
ENSMUSG00000032518	2047.9	0.138035	0.0657869	2.09821	0.0358866	0.313531	Rpsa	protein_coding
ENSMUSG00000027665	1837.46	0.182506	0.0870684	2.09613	0.0360708	0.313531	Pik3ca	protein_coding
ENSMUSG00000031972	316427	0.196174	0.0936405	2.09497	0.0361734	0.313531	Acta1	protein_coding
ENSMUSG00000027091	668.873	0.218496	0.10417	2.09749	0.0359504	0.313531	Zc3h15	protein_coding
ENSMUSG00000028309	450.41	0.28704	0.136945	2.09602	0.0360804	0.313531	Rnf20	protein_coding
ENSMUSG00000000131	165.822	0.30341	0.144835	2.09486	0.0361835	0.313531	Xpo6	protein_coding
ENSMUSG00000012640	192.11	0.312913	0.149094	2.09876	0.035838	0.313531	Zfp715	protein_coding
ENSMUSG00000071266	138.025	0.320188	0.152806	2.09539	0.0361364	0.313531	Zfp946	protein_coding
ENSMUSG00000022774	194.803	0.338288	0.161393	2.09606	0.0360772	0.313531	Ncbp2	protein_coding
ENSMUSG00000018217	1089.21	1.0551	0.503404	2.09592	0.0360891	0.313531	Pmp22	protein_coding
ENSMUSG00000082816	125.178	-0.295829	0.141298	-2.09366	0.0362902	0.313978	Gm11953	processed_pseudogene
ENSMUSG00000001508	2573.67	0.152015	0.0726214	2.09325	0.0363266	0.313978	Sgca	protein_coding
ENSMUSG00000032621	339.851	0.216617	0.10349	2.09311	0.0363393	0.313978	Srek1	protein_coding
ENSMUSG00000045776	2168.21	-0.341562	0.163324	-2.09131	0.0365002	0.314952	Lrtm1	protein_coding
ENSMUSG00000044791	718.311	0.207123	0.0990646	2.09078	0.0365475	0.314952	Setd2	protein_coding
ENSMUSG00000042354	405.075	0.284471	0.136047	2.09098	0.0365302	0.314952	Gnl3	protein_coding
ENSMUSG00000066324	4968.46	-0.2211	0.105804	-2.08972	0.0366433	0.315231	Bpnt2	protein_coding
ENSMUSG00000000759	257.846	-0.220039	0.105296	-2.08971	0.0366436	0.315231	Tubgcp3	protein_coding
ENSMUSG00000044197	886.208	-0.243435	0.116515	-2.0893	0.0366807	0.315276	Gpr146	protein_coding
ENSMUSG00000024049	22091.4	0.14238	0.0681746	2.08845	0.0367569	0.315656	Myom1	protein_coding
ENSMUSG00000029298	146.908	0.389495	0.186551	2.08787	0.0368095	0.315834	Gbp9	protein_coding
ENSMUSG00000000751	1170.21	0.115708	0.0554449	2.0869	0.0368976	0.316021	Rpa1	protein_coding
ENSMUSG00000022791	380.976	0.187782	0.0899876	2.08675	0.0369104	0.316021	Tnk2	protein_coding
ENSMUSG00000033458	127.858	0.32372	0.155145	2.08657	0.0369271	0.316021	Fan1	protein_coding
ENSMUSG00000020952	311.669	0.370539	0.177625	2.08607	0.036972	0.316131	Scfd1	protein_coding
ENSMUSG00000016194	135.951	-0.32518	0.155919	-2.08557	0.0370174	0.316246	Hsd11b1	protein_coding
ENSMUSG00000039087	779.504	-0.227476	0.109125	-2.08454	0.0371107	0.31677	Rreb1	protein_coding
ENSMUSG00000052305	1469.47	-0.360829	0.173309	-2.082	0.0373425	0.317926	Hbb-bs	protein_coding
ENSMUSG00000045302	447.378	0.180196	0.0865213	2.08268	0.0372806	0.317926	Preb	protein_coding
ENSMUSG00000078866	80.195	0.391487	0.188033	2.08201	0.0373415	0.317926	Zfp970	protein_coding
ENSMUSG00000020941	76.2624	-0.558163	0.268215	-2.08103	0.0374313	0.318407	Map3k14	protein_coding
ENSMUSG00000034453	204.937	0.255381	0.122796	2.07973	0.0375507	0.319149	Polr3b	protein_coding
ENSMUSG00000037225	246.36	0.317827	0.15285	2.07933	0.0375866	0.31918	Fgf2	protein_coding
ENSMUSG00000005483	96.8411	-0.396602	0.190773	-2.07892	0.0376249	0.319231	Dnajb1	protein_coding
ENSMUSG00000026223	302.345	0.220164	0.105944	2.07811	0.0376994	0.319589	Itm2c	protein_coding
ENSMUSG00000026678	7861.96	0.304119	0.146391	2.07744	0.0377606	0.319834	Rgs5	protein_coding
ENSMUSG00000071540	6667.16	-0.284526	0.137105	-2.07524	0.0379641	0.321282	3425401B19Rik	protein_coding
ENSMUSG00000027752	132.406	0.290421	0.139993	2.07453	0.0380298	0.321563	Exosc8	protein_coding
ENSMUSG00000011305	179.769	-0.427003	0.205908	-2.07375	0.0381024	0.321802	Plin5	protein_coding
ENSMUSG00000006134	797.04	-0.163563	0.0788816	-2.07353	0.0381231	0.321802	Crkl	protein_coding
ENSMUSG00000025492	625.253	0.199144	0.0961198	2.07183	0.0382812	0.322311	Ifitm3	protein_coding
ENSMUSG00000075054	241.141	0.279884	0.135054	2.07238	0.0382298	0.322311	Yae1d1	protein_coding
ENSMUSG00000024998	130.602	0.466827	0.225303	2.072	0.0382658	0.322311	Plce1	protein_coding
ENSMUSG00000013698	563.753	0.206999	0.0999856	2.07029	0.0384252	0.322974	Pea15a	protein_coding
ENSMUSG00000046879	240.84	0.215697	0.104184	2.07034	0.0384202	0.322974	Irgm1	protein_coding
ENSMUSG00000010830	66.0641	0.624593	0.3018	2.06956	0.0384933	0.323272	Kdelr3	protein_coding
ENSMUSG00000034161	65.82	0.431207	0.208498	2.06817	0.0386245	0.324099	Scx	protein_coding
ENSMUSG00000027835	139.805	-0.313447	0.151626	-2.06724	0.0387119	0.324557	Pdcd10	protein_coding
ENSMUSG00000070490	204.099	-0.247464	0.119847	-2.06484	0.0389385	0.325564	Gm10293	processed_pseudogene
ENSMUSG00000037926	1597.08	-0.244504	0.11841	-2.0649	0.0389326	0.325564	Ssh2	protein_coding
ENSMUSG00000030704	2581.4	-0.233692	0.113206	-2.06431	0.0389888	0.325564	Rab6a	protein_coding
ENSMUSG00000040506	313.048	-0.230981	0.111876	-2.06462	0.0389588	0.325564	Ambra1	protein_coding
ENSMUSG00000028713	67.1601	0.419654	0.203299	2.06422	0.0389966	0.325564	Cyp4b1	protein_coding
ENSMUSG00000015176	545.328	0.200969	0.0974127	2.06307	0.0391059	0.326201	Nolc1	protein_coding
ENSMUSG00000096188	213.547	-0.235053	0.114042	-2.06111	0.0392923	0.326507	Cmtm4	protein_coding
ENSMUSG00000038299	432.511	-0.233693	0.113444	-2.05999	0.0393992	0.326507	Wdr36	protein_coding
ENSMUSG00000025068	531.882	-0.162143	0.0786915	-2.06049	0.039352	0.326507	Gsto1	protein_coding
ENSMUSG00000002981	1085.02	-0.127307	0.0617879	-2.06039	0.0393613	0.326507	Clptm1	protein_coding
ENSMUSG00000024387	1467.34	0.125759	0.0609944	2.06181	0.0392259	0.326507	Csnk2b	protein_coding
ENSMUSG00000031826	755.777	0.142241	0.0690263	2.06067	0.0393342	0.326507	Usp10	protein_coding
ENSMUSG00000015597	284.597	0.200851	0.0975011	2.05999	0.0393999	0.326507	Zfp318	protein_coding
ENSMUSG00000057363	207.913	0.246309	0.119572	2.05992	0.0394066	0.326507	Uxs1	protein_coding
ENSMUSG00000020048	2071.38	0.400568	0.194608	2.05833	0.0395587	0.327493	Hsp90b1	protein_coding
ENSMUSG00000021779	278.464	0.249587	0.121295	2.05768	0.0396208	0.327733	Thrb	protein_coding
ENSMUSG00000033396	172.231	-0.246883	0.120031	-2.05682	0.0397039	0.328146	Spg11	protein_coding
ENSMUSG00000026576	4422.41	-0.398944	0.194148	-2.05484	0.0398942	0.329169	Atp1b1	protein_coding
ENSMUSG00000027479	778.888	0.137299	0.0668109	2.05504	0.0398755	0.329169	Mapre1	protein_coding
ENSMUSG00000025130	2941.74	0.196991	0.0958925	2.05429	0.0399477	0.329335	P4hb	protein_coding
ENSMUSG00000041997	1128.58	-0.13439	0.0654933	-2.05197	0.0401725	0.330913	Tlk1	protein_coding
ENSMUSG00000064302	1131.5	0.141759	0.069169	2.04945	0.0404178	0.332657	Clasp1	protein_coding
ENSMUSG00000029213	484.054	0.183006	0.089324	2.04879	0.0404831	0.332917	Commd8	protein_coding
ENSMUSG00000046785	1715.07	-0.137269	0.0670538	-2.04714	0.0406443	0.333965	Epm2aip1	protein_coding
ENSMUSG00000028882	180.747	-0.255185	0.124733	-2.04584	0.0407719	0.334736	Ppp1r8	protein_coding
ENSMUSG00000098222	99.3916	-0.31662	0.154922	-2.04374	0.0409793	0.335603	Gm8318	processed_pseudogene
ENSMUSG00000028426	2321.51	-0.210363	0.102915	-2.04403	0.0409503	0.335603	Rad23b	protein_coding
ENSMUSG00000027102	118.79	0.435963	0.213286	2.04403	0.0409504	0.335603	Hoxd8	protein_coding
ENSMUSG00000036534	91.7329	-0.360105	0.176314	-2.0424	0.0411116	0.335852	Slc38a7	protein_coding
ENSMUSG00000038991	733.209	-0.172807	0.0846058	-2.0425	0.0411022	0.335852	Txndc5	protein_coding
ENSMUSG00000003534	94.6319	0.330079	0.161572	2.04292	0.0410604	0.335852	Ddr1	protein_coding
ENSMUSG00000037487	2672.67	0.186618	0.0914214	2.0413	0.041221	0.336191	Ubr5	protein_coding
ENSMUSG00000110444	215.163	0.373571	0.182996	2.04142	0.0412096	0.336191	Gm10033	protein_coding
ENSMUSG00000038608	67.3442	0.435686	0.213482	2.04086	0.0412649	0.336272	Dock10	protein_coding
ENSMUSG00000031145	254.27	-0.38744	0.189908	-2.04015	0.0413356	0.336571	Prickle3	protein_coding
ENSMUSG00000026003	4408.12	-0.278146	0.136407	-2.03908	0.0414416	0.336603	Acadl	protein_coding
ENSMUSG00000020836	2200.06	-0.226169	0.1109	-2.03939	0.0414112	0.336603	Coro6	protein_coding
ENSMUSG00000030660	251.451	0.316469	0.155177	2.03941	0.0414093	0.336603	Pik3c2a	protein_coding
ENSMUSG00000073838	466.266	-0.18344	0.0900494	-2.03711	0.0416393	0.337931	Tufm	protein_coding
ENSMUSG00000029314	70.9939	-0.496176	0.243661	-2.03633	0.0417168	0.338005	Gpat3	protein_coding
ENSMUSG00000029536	673.37	-0.148919	0.0731202	-2.03663	0.0416867	0.338005	Gatc	protein_coding
ENSMUSG00000029484	267.61	0.281999	0.138507	2.03598	0.0417519	0.338013	Anxa3	protein_coding
ENSMUSG00000024668	733.307	-0.169044	0.0830644	-2.0351	0.0418407	0.338178	Sdhaf2	protein_coding
ENSMUSG00000028630	1651.24	0.17575	0.0863526	2.03526	0.0418249	0.338178	Dyrk2	protein_coding
ENSMUSG00000055839	1252.87	0.191391	0.0940745	2.03446	0.0419049	0.338421	Elob	protein_coding
ENSMUSG00000038970	1330.87	-0.213284	0.10491	-2.03302	0.0420503	0.339317	Lmtk2	protein_coding
ENSMUSG00000015850	209.395	-0.419051	0.20623	-2.03196	0.0421579	0.339513	Adamtsl4	protein_coding
ENSMUSG00000003662	451.37	-0.163696	0.0805623	-2.03192	0.042162	0.339513	Ciao1	protein_coding
ENSMUSG00000027012	1159.35	-0.146291	0.0720021	-2.03177	0.0421774	0.339513	Dync1i2	protein_coding
ENSMUSG00000021752	135.275	-0.295027	0.145269	-2.03091	0.0422643	0.339936	Kctd6	protein_coding
ENSMUSG00000031954	197.509	0.290405	0.14302	2.03053	0.0423028	0.339969	Cfdp1	protein_coding
ENSMUSG00000028247	442.792	-0.219654	0.108239	-2.02935	0.0424231	0.34013	Coq3	protein_coding
ENSMUSG00000037826	250.214	0.287627	0.141736	2.02932	0.0424261	0.34013	Ppm1k	protein_coding
ENSMUSG00000020070	110.262	0.346024	0.170486	2.02964	0.0423935	0.34013	Rufy2	protein_coding
ENSMUSG00000020817	1143.19	0.220805	0.108854	2.02846	0.0425131	0.340552	Rabep1	protein_coding
ENSMUSG00000020495	196.094	-0.260696	0.128586	-2.02741	0.042621	0.340864	Smg8	protein_coding
ENSMUSG00000026803	113.628	0.363424	0.179238	2.0276	0.0426007	0.340864	Ttf1	protein_coding
ENSMUSG00000016427	1394.57	-0.146843	0.0724865	-2.0258	0.0427857	0.341611	Ndufa1	protein_coding
ENSMUSG00000032280	317.352	0.263997	0.130335	2.02553	0.0428128	0.341611	Tle3	protein_coding
ENSMUSG00000043716	1832.55	0.282691	0.139583	2.02525	0.042842	0.341611	Rpl7	protein_coding
ENSMUSG00000031314	274.278	0.304157	0.15019	2.02515	0.0428525	0.341611	Taf1	protein_coding
ENSMUSG00000081721	119.036	-0.325504	0.160901	-2.02301	0.0430717	0.342275	Gm13882	processed_pseudogene
ENSMUSG00000030353	119.904	-0.353754	0.174872	-2.02293	0.0430803	0.342275	Tead4	protein_coding
ENSMUSG00000051000	1123.27	-0.226819	0.112103	-2.02331	0.0430407	0.342275	Fhip1a	protein_coding
ENSMUSG00000046873	440.532	-0.197997	0.0978897	-2.02265	0.0431088	0.342275	Mbtps2	protein_coding
ENSMUSG00000031722	84.6935	1.82791	0.903143	2.02395	0.0429754	0.342275	Hp	protein_coding
ENSMUSG00000006717	1776.49	-0.162437	0.0803479	-2.02166	0.043211	0.342812	Acot13	protein_coding
ENSMUSG00000021701	165.618	0.316662	0.156703	2.02078	0.043303	0.343266	Plk2	protein_coding
ENSMUSG00000028248	753.037	0.260653	0.129023	2.02021	0.043362	0.343459	Pnisr	protein_coding
ENSMUSG00000025508	2072	0.12987	0.0643273	2.0189	0.0434975	0.343962	Rplp2	protein_coding
ENSMUSG00000040888	419.875	0.160941	0.0797292	2.01859	0.0435298	0.343962	Gfer	protein_coding
ENSMUSG00000027276	147.798	0.300082	0.148649	2.01872	0.0435162	0.343962	Jag1	protein_coding
ENSMUSG00000026199	70.8621	-0.372683	0.184785	-2.01684	0.0437122	0.344853	Ankzf1	protein_coding
ENSMUSG00000002010	4825.96	-0.14026	0.0695373	-2.01704	0.0436909	0.344853	Idh3g	protein_coding
ENSMUSG00000084403	126.371	-0.559088	0.277426	-2.01527	0.0438766	0.345874	Rps15a-ps8	processed_pseudogene
ENSMUSG00000028098	1765.58	-0.274624	0.136307	-2.01475	0.0439306	0.346023	Rnf115	protein_coding
ENSMUSG00000033166	326.092	0.189123	0.0939396	2.01324	0.0440896	0.347	Dis3	protein_coding
ENSMUSG00000027774	2718.73	-0.150276	0.0746933	-2.01191	0.0442295	0.347272	Gfm1	protein_coding
ENSMUSG00000023106	561.704	0.22491	0.111764	2.01237	0.0441806	0.347272	Denr	protein_coding
ENSMUSG00000033849	74.4085	0.669346	0.332676	2.01201	0.0442191	0.347272	B3galt2	protein_coding
ENSMUSG00000030126	1220.2	0.129778	0.064538	2.01087	0.0443389	0.347855	Tmcc1	protein_coding
ENSMUSG00000029650	200.593	0.255397	0.127034	2.01046	0.0443822	0.347918	Slc46a3	protein_coding
ENSMUSG00000070643	103.819	0.330116	0.164239	2.00997	0.0444348	0.348055	Sox13	protein_coding
ENSMUSG00000022426	274.493	-0.20428	0.101772	-2.00723	0.0447255	0.349502	Josd1	protein_coding
ENSMUSG00000021413	697.648	0.247104	0.123077	2.00772	0.0446728	0.349502	Prpf4b	protein_coding
ENSMUSG00000031671	125.952	0.321393	0.160106	2.00737	0.0447102	0.349502	Setd6	protein_coding
ENSMUSG00000049969	267.247	-0.208108	0.103772	-2.00544	0.0449164	0.350449	Plekhf2	protein_coding
ENSMUSG00000037493	1381.95	0.1712	0.0853685	2.00543	0.0449176	0.350449	Cib2	protein_coding
ENSMUSG00000026596	538.776	-0.188366	0.0939824	-2.00427	0.0450411	0.351001	Abl2	protein_coding
ENSMUSG00000019863	333.932	-0.185163	0.0924075	-2.00377	0.0450948	0.351001	Qrsl1	protein_coding
ENSMUSG00000040280	79.9216	0.419938	0.20955	2.004	0.04507	0.351001	Ndufa4l2	protein_coding
ENSMUSG00000079941	105.834	-0.443027	0.22114	-2.00338	0.0451368	0.351052	Cox5b-ps	protein_coding
ENSMUSG00000085795	438.155	-0.341347	0.170518	-2.00182	0.0453045	0.351434	Zfp703	protein_coding
ENSMUSG00000030983	1093.22	0.169456	0.0846514	2.00181	0.0453056	0.351434	Bccip	protein_coding
ENSMUSG00000090112	320.927	0.184814	0.0923134	2.00203	0.0452815	0.351434	Shprh	protein_coding
ENSMUSG00000033910	293.321	0.260541	0.130221	2.00076	0.0454178	0.351434	Gucy1a1	protein_coding
ENSMUSG00000068114	85.9855	0.3499	0.174836	2.0013	0.0453599	0.351434	Ccdc134	protein_coding
ENSMUSG00000062825	265.262	0.365459	0.182628	2.00111	0.0453804	0.351434	Actg1	protein_coding
ENSMUSG00000024664	71.8071	0.617718	0.308765	2.00061	0.0454346	0.351434	Fads3	protein_coding
ENSMUSG00000040928	97.4734	-0.374865	0.187506	-1.99922	0.0455846	0.352319	S100pbp	protein_coding
ENSMUSG00000028992	462.297	-0.210897	0.105574	-1.99761	0.0457587	0.353113	Nmnat1	protein_coding
ENSMUSG00000018593	9016.31	0.616659	0.308652	1.99791	0.0457263	0.353113	Sparc	protein_coding
ENSMUSG00000023026	162.833	-0.261368	0.130922	-1.99637	0.0458937	0.35328	Dip2b	protein_coding
ENSMUSG00000028557	3774.07	-0.159312	0.0798697	-1.99464	0.0460817	0.35328	Rnf11	protein_coding
ENSMUSG00000057177	1177.54	-0.126053	0.0632159	-1.99401	0.0461507	0.35328	Gsk3a	protein_coding
ENSMUSG00000028798	1365.61	0.127872	0.0641348	1.99381	0.0461731	0.35328	Eif3i	protein_coding
ENSMUSG00000028207	2999.9	0.137346	0.0688079	1.99608	0.0459255	0.35328	Asph	protein_coding
ENSMUSG00000026276	1308.33	0.142632	0.0715085	1.99461	0.0460853	0.35328	Septin2	protein_coding
ENSMUSG00000017404	923.382	0.180928	0.0907104	1.99457	0.0460901	0.35328	Rpl19	protein_coding
ENSMUSG00000063511	386.546	0.208651	0.104492	1.99681	0.0458457	0.35328	Snrnp70	protein_coding
ENSMUSG00000033257	401.3	0.218084	0.10931	1.9951	0.0460317	0.35328	Ttll4	protein_coding
ENSMUSG00000031647	323.956	0.41711	0.208928	1.99643	0.0458869	0.35328	Mfap3l	protein_coding
ENSMUSG00000020773	81.2893	0.427337	0.214278	1.99431	0.0461179	0.35328	Trim47	protein_coding
ENSMUSG00000028710	334.684	-0.197365	0.0990293	-1.99299	0.046262	0.353413	Atpaf1	protein_coding
ENSMUSG00000043099	62.2245	0.560085	0.281019	1.99305	0.0462563	0.353413	Hic1	protein_coding
ENSMUSG00000073609	230.009	-0.237377	0.119216	-1.99115	0.0464642	0.354684	D2hgdh	protein_coding
ENSMUSG00000032497	1062.79	0.154278	0.0774999	1.99068	0.0465158	0.354804	Lrrfip2	protein_coding
ENSMUSG00000021756	3791.86	0.165924	0.0834175	1.98908	0.0466929	0.355881	Il6st	protein_coding
ENSMUSG00000087259	109.249	-0.346633	0.174586	-1.98545	0.0470941	0.357075	2610035D17Rik	lncRNA
ENSMUSG00000026484	453.067	-0.247379	0.124522	-1.98663	0.0469637	0.357075	Rnf2	protein_coding
ENSMUSG00000026317	265.377	-0.199339	0.100403	-1.98538	0.0471023	0.357075	Cln8	protein_coding
ENSMUSG00000037706	1113.05	0.134323	0.0676208	1.98641	0.0469877	0.357075	Cd81	protein_coding
ENSMUSG00000030249	7483.91	0.134652	0.067804	1.9859	0.0470447	0.357075	Abcc9	protein_coding
ENSMUSG00000033916	741.107	0.167754	0.0844732	1.98589	0.0470457	0.357075	Chmp2a	protein_coding
ENSMUSG00000026946	72.7516	0.382575	0.192652	1.98583	0.0470524	0.357075	Nmi	protein_coding
ENSMUSG00000064339	138238	-0.113735	0.0573998	-1.98145	0.0475412	0.357295	mt-Rnr2	Mt_rRNA
ENSMUSG00000098113	123.95	-0.303427	0.153229	-1.98022	0.0476791	0.357295	Gm2445	processed_pseudogene
ENSMUSG00000078370	127.344	-0.295258	0.148999	-1.98161	0.047523	0.357295	Gm6316	processed_pseudogene
ENSMUSG00000098149	141.06	-0.269625	0.136141	-1.98048	0.0476492	0.357295	Gapdh-ps14	processed_pseudogene
ENSMUSG00000056501	386.232	-0.331421	0.167016	-1.98436	0.0472154	0.357295	Cebpb	protein_coding
ENSMUSG00000057604	2352.04	-0.315808	0.159421	-1.98097	0.0475945	0.357295	Lmcd1	protein_coding
ENSMUSG00000022827	162.477	-0.299117	0.151029	-1.98053	0.0476436	0.357295	Rabl3	protein_coding
ENSMUSG00000025584	316.051	-0.276314	0.139294	-1.98367	0.0472923	0.357295	Pde8a	protein_coding
ENSMUSG00000028126	628.182	-0.182332	0.0920712	-1.98033	0.0476662	0.357295	Pip5k1a	protein_coding
ENSMUSG00000028646	540.821	-0.169262	0.085376	-1.98255	0.0474182	0.357295	Rragc	protein_coding
ENSMUSG00000049680	525.502	-0.152964	0.0771698	-1.98218	0.0474592	0.357295	Urgcp	protein_coding
ENSMUSG00000000346	1418.02	-0.134075	0.0677216	-1.9798	0.0477258	0.357295	Dazap2	protein_coding
ENSMUSG00000028284	1951.67	-0.127811	0.0644821	-1.98212	0.0474662	0.357295	Map3k7	protein_coding
ENSMUSG00000040188	524.219	0.24251	0.1222	1.98453	0.0471963	0.357295	Scamp2	protein_coding
ENSMUSG00000018899	109.39	0.325307	0.164122	1.98211	0.0474671	0.357295	Irf1	protein_coding
ENSMUSG00000037640	124.385	0.345382	0.174287	1.98169	0.047514	0.357295	Zfp60	protein_coding
ENSMUSG00000059482	88.8827	0.407353	0.205772	1.97963	0.0477452	0.357295	Cfap418	protein_coding
ENSMUSG00000029557	72.8946	-0.360136	0.182066	-1.97806	0.0479225	0.357917	Mrm2	protein_coding
ENSMUSG00000029669	475.705	-0.340174	0.172038	-1.97731	0.0480062	0.357917	Tspan12	protein_coding
ENSMUSG00000055493	2112.12	-0.218372	0.110411	-1.97781	0.0479499	0.357917	Epm2a	protein_coding
ENSMUSG00000028221	732.676	-0.1687	0.0853191	-1.97729	0.0480093	0.357917	Pip4p2	protein_coding
ENSMUSG00000049295	111.299	0.306184	0.1548	1.97794	0.0479357	0.357917	Zfp219	protein_coding
ENSMUSG00000031641	318.478	-0.20775	0.105141	-1.97592	0.0481636	0.358605	Cbr4	protein_coding
ENSMUSG00000035027	1481.35	0.119424	0.0604427	1.97583	0.0481741	0.358605	Map2k2	protein_coding
ENSMUSG00000048874	599.399	0.195454	0.0989523	1.97523	0.0482418	0.358839	Phf3	protein_coding
ENSMUSG00000034354	1199.48	-0.235479	0.119317	-1.97356	0.048432	0.359262	Mtmr3	protein_coding
ENSMUSG00000034247	323.514	-0.194997	0.0988323	-1.97301	0.0484942	0.359262	Plekhm1	protein_coding
ENSMUSG00000078584	704.755	-0.165999	0.0841211	-1.97333	0.0484578	0.359262	AU022252	protein_coding
ENSMUSG00000014077	1415.78	-0.145378	0.0736907	-1.97282	0.0485165	0.359262	Chp1	protein_coding
ENSMUSG00000041891	1649.38	0.1252	0.0634347	1.97368	0.0484183	0.359262	Lman1	protein_coding
ENSMUSG00000017760	883.723	0.149697	0.0758388	1.97388	0.0483954	0.359262	Ctsa	protein_coding
ENSMUSG00000026944	445.821	-0.1778	0.0902254	-1.97062	0.0487673	0.360579	Abca2	protein_coding
ENSMUSG00000039041	564.739	0.14703	0.0746003	1.97091	0.0487342	0.360579	Adrm1	protein_coding
ENSMUSG00000002803	211.118	-0.234235	0.118896	-1.97009	0.0488285	0.360762	Btbd6	protein_coding
ENSMUSG00000068882	880.133	0.249995	0.126989	1.96863	0.048996	0.361609	Ssb	protein_coding
ENSMUSG00000031788	81.5321	0.369937	0.187933	1.96845	0.0490163	0.361609	Kifc3	protein_coding
ENSMUSG00000025579	3161.65	0.133156	0.067691	1.96712	0.0491697	0.361936	Gaa	protein_coding
ENSMUSG00000042133	670.104	0.195048	0.0991326	1.96754	0.0491204	0.361936	Ppig	protein_coding
ENSMUSG00000053347	696.498	0.28021	0.142447	1.96711	0.0491703	0.361936	Zfp943	protein_coding
ENSMUSG00000032870	283.471	-0.254575	0.129515	-1.9656	0.0493443	0.362677	Smap2	protein_coding
ENSMUSG00000035954	340.453	-0.22074	0.11229	-1.9658	0.0493213	0.362677	Dock4	protein_coding
ENSMUSG00000002342	535.191	0.186576	0.0950203	1.96354	0.0495838	0.363967	Tmem161a	protein_coding
ENSMUSG00000001305	106.997	0.4367	0.222414	1.96345	0.0495934	0.363967	Rrp15	protein_coding
ENSMUSG00000034345	611.112	-0.147288	0.0750559	-1.96237	0.0497191	0.364436	Gtf2h5	protein_coding
ENSMUSG00000058006	227.512	0.259744	0.132369	1.96227	0.0497309	0.364436	Mdn1	protein_coding
ENSMUSG00000004843	722.164	-0.132344	0.0674798	-1.96124	0.0498505	0.364681	Chmp2b	protein_coding
ENSMUSG00000038145	597.417	0.178871	0.0912115	1.96106	0.049872	0.364681	Snrk	protein_coding
ENSMUSG00000036103	222.648	0.466163	0.237713	1.96103	0.049875	0.364681	Colec12	protein_coding
ENSMUSG00000034973	251.124	0.266762	0.13609	1.9602	0.0499727	0.365037	Dop1a	protein_coding
ENSMUSG00000030555	186.551	0.286907	0.146382	1.95999	0.0499975	0.365037	Ttc23	protein_coding
ENSMUSG00000046861	280.928	-0.213331	0.10887	-1.95951	0.0500534	0.365063	Hectd3	protein_coding
ENSMUSG00000031575	405.166	-0.17567	0.0896875	-1.95869	0.0501486	0.365063	Ash2l	protein_coding
ENSMUSG00000026586	1770.91	-0.167177	0.085342	-1.95891	0.0501237	0.365063	Prrx1	protein_coding
ENSMUSG00000027881	354.496	0.222268	0.113444	1.95928	0.05008	0.365063	Prpf38b	protein_coding
ENSMUSG00000041135	60.2782	-0.453011	0.231386	-1.95782	0.0502513	0.365178	Ripk2	protein_coding
ENSMUSG00000035762	209.162	-0.256778	0.131169	-1.95762	0.0502752	0.365178	Tmem161b	protein_coding
ENSMUSG00000055782	1354.01	0.184691	0.0943176	1.95818	0.0502088	0.365178	Abcd2	protein_coding
ENSMUSG00000039219	276.492	0.291575	0.149036	1.9564	0.0504178	0.365945	Arid4b	protein_coding
ENSMUSG00000001300	188.888	-0.338669	0.173213	-1.95522	0.0505575	0.366507	Efnb2	protein_coding
ENSMUSG00000030671	85.1121	0.660897	0.338035	1.95512	0.0505693	0.366507	Pde3b	protein_coding
ENSMUSG00000009647	503.214	-0.240371	0.123091	-1.95278	0.0508451	0.366626	Mcu	protein_coding
ENSMUSG00000091264	1591.39	-0.140914	0.0721481	-1.95312	0.0508055	0.366626	Smim13	protein_coding
ENSMUSG00000038506	1918.02	-0.116439	0.0596222	-1.95294	0.0508263	0.366626	Dcun1d2	protein_coding
ENSMUSG00000062421	266.177	0.203292	0.104035	1.95408	0.0506921	0.366626	Arf2	protein_coding
ENSMUSG00000039967	364.757	0.260319	0.1333	1.95288	0.0508344	0.366626	Zfp292	protein_coding
ENSMUSG00000022475	147.022	0.314542	0.160992	1.95377	0.0507285	0.366626	Hdac7	protein_coding
ENSMUSG00000020886	80.9555	0.502238	0.25711	1.9534	0.0507726	0.366626	Dlg4	protein_coding
ENSMUSG00000025393	33235.4	-0.111152	0.0569421	-1.95202	0.0509358	0.366745	Atp5f1b	protein_coding
ENSMUSG00000037795	149.901	0.309229	0.158407	1.95212	0.0509244	0.366745	N4bp2	protein_coding
ENSMUSG00000038206	706.748	-0.217961	0.111683	-1.95159	0.0509865	0.366829	Fbxo8	protein_coding
ENSMUSG00000058076	4077.28	-0.174622	0.0894903	-1.9513	0.0510217	0.366829	Sdhc	protein_coding
ENSMUSG00000036376	131.003	-0.288943	0.148111	-1.95086	0.0510743	0.366893	Abt1	protein_coding
ENSMUSG00000028277	781.537	-0.151455	0.0776579	-1.95029	0.0511418	0.366893	Ube2j1	protein_coding
ENSMUSG00000030301	1888.78	0.117401	0.0601897	1.95053	0.0511135	0.366893	Ccdc91	protein_coding
ENSMUSG00000064338	103.886	-0.611014	0.313436	-1.94941	0.0512471	0.367116	mt-Tv	Mt_tRNA
ENSMUSG00000070867	65.9279	0.429658	0.220371	1.9497	0.0512117	0.367116	Trabd2b	protein_coding
ENSMUSG00000004070	548.087	-0.152817	0.0784894	-1.94697	0.0515378	0.368932	Hmox2	protein_coding
ENSMUSG00000036591	577.267	0.223195	0.114686	1.94614	0.0516382	0.369174	Arhgap21	protein_coding
ENSMUSG00000022228	310.058	0.249004	0.127952	1.94607	0.0516463	0.369174	Zscan26	protein_coding
ENSMUSG00000098208	119.357	-0.321326	0.165254	-1.94443	0.0518434	0.369249	Gm8349	processed_pseudogene
ENSMUSG00000022521	1137.25	-0.254704	0.130928	-1.94537	0.0517308	0.369249	Crebbp	protein_coding
ENSMUSG00000028134	360.287	-0.196705	0.101141	-1.94486	0.0517922	0.369249	Ptbp2	protein_coding
ENSMUSG00000001525	618.719	0.209356	0.107658	1.94465	0.0518174	0.369249	Tubb5	protein_coding
ENSMUSG00000026821	170.74	0.319312	0.164184	1.94484	0.051794	0.369249	Ralgds	protein_coding
ENSMUSG00000015656	8910.55	0.302128	0.155429	1.94383	0.0519159	0.3695	Hspa8	protein_coding
ENSMUSG00000029174	2238.82	-0.240637	0.123919	-1.94189	0.0521507	0.370637	Tbc1d1	protein_coding
ENSMUSG00000027599	570.924	-0.144544	0.0744291	-1.94204	0.0521327	0.370637	Armc1	protein_coding
ENSMUSG00000044788	176.45	-0.296155	0.152575	-1.94104	0.0522535	0.371101	Fads6	protein_coding
ENSMUSG00000032998	653.121	-0.178477	0.0919658	-1.94069	0.0522961	0.371137	Foxj3	protein_coding
ENSMUSG00000025857	200.785	-0.220996	0.113914	-1.94002	0.0523768	0.371291	Dnaaf5	protein_coding
ENSMUSG00000023027	605.732	0.160643	0.0828232	1.93958	0.0524303	0.371291	Atf1	protein_coding
ENSMUSG00000074305	425.148	0.193793	0.0999071	1.93974	0.0524118	0.371291	Peak1	protein_coding
ENSMUSG00000009112	2068.32	-0.129999	0.0670561	-1.93866	0.052543	0.371822	Bcl2l13	protein_coding
ENSMUSG00000022789	1447.29	0.195252	0.100747	1.93805	0.0526175	0.372048	Dnm1l	protein_coding
ENSMUSG00000036745	3956.73	0.272462	0.140605	1.93778	0.0526501	0.372048	Ttll7	protein_coding
ENSMUSG00000037110	287.478	-0.278411	0.143713	-1.93727	0.0527122	0.372221	Ralgapa2	protein_coding
ENSMUSG00000030970	119.341	0.285816	0.147615	1.93623	0.0528398	0.372856	Ctbp2	protein_coding
ENSMUSG00000038046	133.873	-0.271741	0.140416	-1.93525	0.0529591	0.373431	Mrm3	protein_coding
ENSMUSG00000020134	384.228	-0.224282	0.115913	-1.93491	0.0530014	0.373463	Peli1	protein_coding
ENSMUSG00000035757	265.258	-0.218799	0.113161	-1.93351	0.0531733	0.374408	Selenoo	protein_coding
ENSMUSG00000035923	1876.11	0.12612	0.0653063	1.93121	0.0534574	0.37539	Myf6	protein_coding
ENSMUSG00000054693	476.384	0.231105	0.119672	1.93115	0.0534645	0.37539	Adam10	protein_coding
ENSMUSG00000029502	1020.91	0.267713	0.138577	1.93187	0.0533752	0.37539	Golga3	protein_coding
ENSMUSG00000031075	83.8003	0.352779	0.182629	1.93167	0.0534004	0.37539	Ano1	protein_coding
ENSMUSG00000022551	4358	-0.202857	0.10515	-1.92923	0.0537027	0.376795	Cyc1	protein_coding
ENSMUSG00000026174	349.752	-0.208805	0.108274	-1.92849	0.0537948	0.377173	Cnot9	protein_coding
ENSMUSG00000039361	2067.71	-0.130842	0.0678652	-1.92796	0.0538596	0.37736	Picalm	protein_coding
ENSMUSG00000027712	703.555	0.352295	0.182824	1.92696	0.0539842	0.377966	Anxa5	protein_coding
ENSMUSG00000105504	65.99	0.547046	0.283997	1.92624	0.0540741	0.378327	Gbp5	protein_coding
ENSMUSG00000063904	159.94	-0.290285	0.150791	-1.92508	0.0542194	0.378443	Dpp3	protein_coding
ENSMUSG00000010517	1508.59	-0.17554	0.0911952	-1.92489	0.0542436	0.378443	Faf1	protein_coding
ENSMUSG00000001323	452.66	0.217841	0.113152	1.92521	0.0542028	0.378443	Srr	protein_coding
ENSMUSG00000047146	71.7152	0.503084	0.261287	1.92541	0.0541783	0.378443	Tet1	protein_coding
ENSMUSG00000027832	65.1626	-0.544537	0.28318	-1.92293	0.0544882	0.379669	Ptx3	protein_coding
ENSMUSG00000030711	403.48	0.266211	0.138445	1.92287	0.0544961	0.379669	Sult1a1	protein_coding
ENSMUSG00000023087	656.506	-0.334919	0.174268	-1.92187	0.0546227	0.380283	Noct	protein_coding
ENSMUSG00000022098	188.955	0.331665	0.172677	1.92073	0.0547659	0.381012	Bmp1	protein_coding
ENSMUSG00000062646	632.685	0.130825	0.0681337	1.92012	0.0548425	0.381277	Ganc	protein_coding
ENSMUSG00000066798	145.996	-0.284848	0.148481	-1.91842	0.0550583	0.382509	Zbtb6	protein_coding
ENSMUSG00000006215	310.241	-0.217833	0.11359	-1.91771	0.0551477	0.382592	Zbtb17	protein_coding
ENSMUSG00000028256	139.031	0.274587	0.143179	1.91779	0.0551371	0.382592	Odf2l	protein_coding
ENSMUSG00000073737	140.493	-0.284307	0.148398	-1.91585	0.0553847	0.383474	Gm10566	processed_pseudogene
ENSMUSG00000069208	139.352	-0.261974	0.136787	-1.91519	0.0554686	0.383474	Zfp825	protein_coding
ENSMUSG00000034254	639.72	0.130979	0.0683465	1.9164	0.055314	0.383474	Agpat1	protein_coding
ENSMUSG00000055065	1085.04	0.192463	0.10047	1.91563	0.0554122	0.383474	Ddx17	protein_coding
ENSMUSG00000028069	157.9	0.337191	0.176055	1.91525	0.05546	0.383474	Gpatch4	protein_coding
ENSMUSG00000030722	63.793	-0.403019	0.210498	-1.91459	0.0555443	0.383562	Nfatc2ip	protein_coding
ENSMUSG00000090015	61.8467	0.43632	0.227905	1.91448	0.0555589	0.383562	Gm15446	protein_coding
ENSMUSG00000026404	219.525	-0.257622	0.134656	-1.91318	0.0557252	0.384174	Ddx59	protein_coding
ENSMUSG00000049775	3418.22	0.174348	0.0911259	1.91327	0.0557139	0.384174	Tmsb4x	protein_coding
ENSMUSG00000038342	1850.07	-0.139632	0.0730167	-1.91234	0.0558331	0.384521	Mlxip	protein_coding
ENSMUSG00000021428	136.591	0.275051	0.143841	1.91218	0.0558533	0.384521	Riok1	protein_coding
ENSMUSG00000064367	641697	-0.222912	0.116604	-1.9117	0.0559144	0.384674	mt-Nd5	protein_coding
ENSMUSG00000027384	741.171	-0.189373	0.0991133	-1.91068	0.0560463	0.385313	Ndufaf5	protein_coding
ENSMUSG00000018425	378.193	-0.202215	0.10589	-1.90967	0.0561759	0.385936	Dhx40	protein_coding
ENSMUSG00000019806	151.58	-0.267667	0.140196	-1.90923	0.0562319	0.385991	Aig1	protein_coding
ENSMUSG00000026455	365.951	-0.173626	0.0909512	-1.909	0.0562619	0.385991	Klhl12	protein_coding
ENSMUSG00000029169	1057.82	-0.120769	0.0632928	-1.90811	0.0563775	0.386516	Dhx15	protein_coding
ENSMUSG00000080717	102.269	0.40918	0.214492	1.90767	0.0564338	0.386634	B230307C23Rik	protein_coding
ENSMUSG00000064343	89.4124	-0.477266	0.250281	-1.90692	0.0565305	0.386856	mt-Tq	Mt_tRNA
ENSMUSG00000033943	887.048	0.236616	0.12409	1.90682	0.0565443	0.386856	Mga	protein_coding
ENSMUSG00000018707	3202.11	0.168182	0.0882517	1.90571	0.0566876	0.387568	Dync1h1	protein_coding
ENSMUSG00000035770	1360.06	0.187051	0.0981711	1.90535	0.0567342	0.387619	Dync1li2	protein_coding
ENSMUSG00000045838	222.025	0.22002	0.115493	1.90505	0.0567737	0.387621	Ccdc9b	protein_coding
ENSMUSG00000020847	164.095	-0.288588	0.151553	-1.90421	0.0568829	0.388098	Rph3al	protein_coding
ENSMUSG00000017778	2504.39	-0.156402	0.0821681	-1.90344	0.0569827	0.388312	Cox7c	protein_coding
ENSMUSG00000002274	245.302	0.353405	0.185674	1.90337	0.0569927	0.388312	Metrn	protein_coding
ENSMUSG00000054894	349.941	-0.172462	0.0906704	-1.90208	0.0571611	0.389191	Dmac2l	protein_coding
ENSMUSG00000032602	1022.78	-0.213514	0.11232	-1.90094	0.0573099	0.389309	Slc25a20	protein_coding
ENSMUSG00000038429	572.287	-0.145404	0.0764983	-1.90074	0.0573358	0.389309	Usp5	protein_coding
ENSMUSG00000033808	555.513	0.219955	0.11571	1.90092	0.057313	0.389309	Tmem87a	protein_coding
ENSMUSG00000033904	77.2582	0.367751	0.193404	1.90146	0.0572414	0.389309	Ccp110	protein_coding
ENSMUSG00000019854	340.28	-0.21081	0.110928	-1.90043	0.0573767	0.389319	Reps1	protein_coding
ENSMUSG00000097354	310.037	-0.262748	0.138464	-1.89759	0.0577497	0.390511	2310001H17Rik	lncRNA
ENSMUSG00000069844	136.71	-0.266878	0.140636	-1.89764	0.0577431	0.390511	Sco1	protein_coding
ENSMUSG00000057133	704.124	-0.20781	0.109465	-1.89842	0.0576404	0.390511	Chd6	protein_coding
ENSMUSG00000024941	1251.14	-0.131629	0.0693584	-1.89781	0.0577216	0.390511	Scyl1	protein_coding
ENSMUSG00000006342	64.0797	0.381928	0.2012	1.89825	0.0576632	0.390511	Susd2	protein_coding
ENSMUSG00000032897	325.064	-0.20529	0.108232	-1.89677	0.0578589	0.390982	Nfyc	protein_coding
ENSMUSG00000008450	242.991	0.19953	0.105223	1.89626	0.0579261	0.391169	Nutf2	protein_coding
ENSMUSG00000028988	299.973	0.285745	0.150787	1.89503	0.0580883	0.39173	Ctnnbip1	protein_coding
ENSMUSG00000001918	238.548	0.626167	0.330424	1.89504	0.0580872	0.39173	Slc1a5	protein_coding
ENSMUSG00000040481	773.848	0.169445	0.0894322	1.89468	0.0581352	0.391779	Bptf	protein_coding
ENSMUSG00000027589	1121.26	-0.167676	0.0885403	-1.89379	0.0582534	0.39222	Pcmtd2	protein_coding
ENSMUSG00000031342	235.66	0.544291	0.287439	1.89359	0.05828	0.39222	Gpm6b	protein_coding
ENSMUSG00000037907	123.151	-0.270644	0.142958	-1.89317	0.058335	0.392324	Ankrd13b	protein_coding
ENSMUSG00000075467	324.305	-0.243769	0.128901	-1.89113	0.0586076	0.393152	Dnlz	protein_coding
ENSMUSG00000040374	547.519	-0.239988	0.126856	-1.89182	0.0585155	0.393152	Pex2	protein_coding
ENSMUSG00000022324	127.116	0.580454	0.306947	1.89105	0.0586172	0.393152	Matn2	protein_coding
ENSMUSG00000114019	132.97	0.396751	0.209781	1.89127	0.0585884	0.393152	Gm47155	TEC
ENSMUSG00000039943	471.595	0.366429	0.193856	1.89021	0.0587302	0.393643	Plcb4	protein_coding
ENSMUSG00000020840	499.86	0.188589	0.0998092	1.88949	0.0588261	0.394019	Blmh	protein_coding
ENSMUSG00000029158	1278.66	-0.199516	0.105691	-1.88774	0.0590613	0.394793	Yipf7	protein_coding
ENSMUSG00000059005	271.797	0.257402	0.136319	1.88824	0.0589938	0.394793	Hnrnpa3	protein_coding
ENSMUSG00000029270	421.904	0.266586	0.141209	1.88788	0.0590418	0.394793	Dipk1a	protein_coding
ENSMUSG00000035929	83.7652	0.427507	0.226537	1.88714	0.0591421	0.395066	H2-Q4	protein_coding
ENSMUSG00000098332	110.755	-0.292318	0.154926	-1.88683	0.0591836	0.395077	Pigbos1	protein_coding
ENSMUSG00000098238	94.8535	-0.331152	0.175642	-1.88538	0.0593791	0.395315	Gm8756	processed_pseudogene
ENSMUSG00000096199	97.4061	-0.326697	0.173247	-1.88572	0.0593324	0.395315	Ptrhd1	protein_coding
ENSMUSG00000001229	913.76	-0.152168	0.0807074	-1.88543	0.0593718	0.395315	Dpp9	protein_coding
ENSMUSG00000054280	122.548	0.301604	0.159938	1.88575	0.059328	0.395315	Prr14l	protein_coding
ENSMUSG00000079311	206.678	-0.262662	0.139352	-1.88488	0.0594457	0.395468	Gm3222	processed_pseudogene
ENSMUSG00000032745	859.727	-0.122245	0.0648647	-1.88461	0.0594821	0.395468	Gpbp1	protein_coding
ENSMUSG00000021114	1144.65	-0.11782	0.0625735	-1.88291	0.0597128	0.396469	Atp6v1d	protein_coding
ENSMUSG00000035024	172.219	0.250491	0.133027	1.88302	0.0596982	0.396469	Ncapd3	protein_coding
ENSMUSG00000028998	897.244	-0.170421	0.0905265	-1.88255	0.0597608	0.396521	Tomm7	protein_coding
ENSMUSG00000042198	357.334	-0.265983	0.141358	-1.88163	0.0598861	0.397086	Chchd7	protein_coding
ENSMUSG00000063317	359.609	-0.211594	0.1125	-1.88085	0.059993	0.397529	Usp31	protein_coding
ENSMUSG00000023990	626.544	0.186566	0.0992225	1.88028	0.0600703	0.397775	Tfeb	protein_coding
ENSMUSG00000049641	927.487	-0.351538	0.187021	-1.87968	0.0601522	0.397784	Vgll2	protein_coding
ENSMUSG00000028073	110.103	0.295399	0.157134	1.87992	0.0601195	0.397784	Pear1	protein_coding
ENSMUSG00000096910	137.973	0.350968	0.186793	1.87891	0.0602566	0.398209	Zfp955b	protein_coding
ENSMUSG00000010097	494.871	0.218636	0.1164	1.87831	0.0603385	0.398444	Nxf1	protein_coding
ENSMUSG00000026674	592.272	0.348627	0.185631	1.87806	0.0603727	0.398444	Ddr2	protein_coding
ENSMUSG00000013593	10056.8	-0.114517	0.0610099	-1.87702	0.0605159	0.398856	Ndufs2	protein_coding
ENSMUSG00000045636	2779.8	0.222694	0.118627	1.87726	0.0604821	0.398856	Mtus1	protein_coding
ENSMUSG00000028086	412.179	0.292786	0.156164	1.87486	0.0608117	0.40054	Fbxw7	protein_coding
ENSMUSG00000041935	742.25	-0.210615	0.112361	-1.87446	0.0608673	0.400639	Rimoc1	protein_coding
ENSMUSG00000091625	104.536	-0.332039	0.177276	-1.87301	0.0610674	0.400678	Lsm5	protein_coding
ENSMUSG00000053134	238.544	-0.190235	0.101561	-1.87312	0.0610522	0.400678	Supt7l	protein_coding
ENSMUSG00000042744	554.228	-0.179606	0.0958504	-1.87382	0.0609559	0.400678	Hectd4	protein_coding
ENSMUSG00000002741	562.951	-0.147787	0.0788872	-1.87339	0.0610145	0.400678	Ykt6	protein_coding
ENSMUSG00000009535	625.246	0.164954	0.088072	1.87295	0.0610757	0.400678	Rnmt	protein_coding
ENSMUSG00000031309	1903.71	0.159093	0.0849767	1.8722	0.0611793	0.400827	Rps6ka3	protein_coding
ENSMUSG00000020883	246.481	0.201018	0.10737	1.8722	0.0611794	0.400827	Fbxl20	protein_coding
ENSMUSG00000062397	821.058	0.123763	0.0661169	1.87188	0.0612232	0.400848	Zfp706	protein_coding
ENSMUSG00000038894	687.217	-0.400408	0.213965	-1.87138	0.0612929	0.401039	Irs2	protein_coding
ENSMUSG00000082362	72.815	-0.371531	0.198586	-1.87088	0.0613615	0.401222	Gm5187	processed_pseudogene
ENSMUSG00000024892	566.744	-0.28785	0.153918	-1.87015	0.0614633	0.401622	Pcx	protein_coding
ENSMUSG00000025766	111.569	0.345129	0.184612	1.86949	0.0615549	0.401956	D3Ertd751e	protein_coding
ENSMUSG00000062901	3787.67	-0.122929	0.0657732	-1.86898	0.0616259	0.402153	Klhl24	protein_coding
ENSMUSG00000022400	775.147	0.133531	0.0714957	1.86767	0.0618079	0.402575	Rbx1	protein_coding
ENSMUSG00000022463	251.859	0.227485	0.121804	1.86764	0.0618125	0.402575	Srebf2	protein_coding
ENSMUSG00000025203	569.607	0.475106	0.254373	1.86776	0.061796	0.402575	Scd2	protein_coding
ENSMUSG00000027858	238.016	0.257277	0.137778	1.86733	0.0618562	0.402594	Tspan2	protein_coding
ENSMUSG00000032549	241.696	-0.348665	0.186843	-1.86609	0.0620289	0.402771	Rab6b	protein_coding
ENSMUSG00000094410	1135.22	0.179626	0.0962364	1.86651	0.0619703	0.402771	Zbed6	protein_coding
ENSMUSG00000031246	380.766	0.282476	0.151383	1.86596	0.0620463	0.402771	Sh3bgrl	protein_coding
ENSMUSG00000026504	128.257	0.336466	0.180269	1.86646	0.061977	0.402771	Sdccag8	protein_coding
ENSMUSG00000020176	1137.51	0.276333	0.148156	1.86516	0.0621596	0.403243	Grb10	protein_coding
ENSMUSG00000031767	252.431	-0.255982	0.137292	-1.86451	0.0622498	0.403299	Nudt7	protein_coding
ENSMUSG00000038546	1104.65	-0.131681	0.0706173	-1.86471	0.0622221	0.403299	Ranbp9	protein_coding
ENSMUSG00000030590	63.4847	-0.379113	0.203402	-1.86386	0.0623413	0.403495	Fam98c	protein_coding
ENSMUSG00000102252	540.7	-0.28304	0.151869	-1.86372	0.0623616	0.403495	Snrpn	protein_coding
ENSMUSG00000003810	2660.45	-0.179129	0.0962067	-1.86192	0.0626144	0.404866	Mast2	protein_coding
ENSMUSG00000064354	303.15	-0.31803	0.170838	-1.86159	0.0626607	0.4049	mt-Co2	protein_coding
ENSMUSG00000078247	125.633	0.27352	0.147064	1.85987	0.0629039	0.406207	Airn	lncRNA
ENSMUSG00000107689	317.137	-0.245628	0.132139	-1.85886	0.0630472	0.406503	Gm44386	lncRNA
ENSMUSG00000031137	730.096	-0.217763	0.117137	-1.85905	0.0630206	0.406503	Fgf13	protein_coding
ENSMUSG00000003660	1296.24	0.164528	0.0885465	1.8581	0.0631552	0.406503	Snrnp200	protein_coding
ENSMUSG00000047591	1126	0.22547	0.12134	1.85816	0.0631456	0.406503	Mafa	protein_coding
ENSMUSG00000002845	151.841	0.250803	0.134943	1.85858	0.0630862	0.406503	Tmem39a	protein_coding
ENSMUSG00000120047	105.333	-0.331134	0.178299	-1.85718	0.0632852	0.406648	Cirpil	lncRNA
ENSMUSG00000039910	699.459	-0.473102	0.254795	-1.85679	0.0633404	0.406648	Cited2	protein_coding
ENSMUSG00000021311	454.607	-0.21209	0.114225	-1.85678	0.0633422	0.406648	Mtr	protein_coding
ENSMUSG00000022235	2102.33	0.239598	0.128983	1.85759	0.0632279	0.406648	Cmbl	protein_coding
ENSMUSG00000026766	1166.13	-0.110149	0.0593434	-1.85613	0.0634352	0.406981	Mmadhc	protein_coding
ENSMUSG00000086866	72.093	-0.37584	0.202551	-1.85553	0.0635199	0.40726	4930512H18Rik	lncRNA
ENSMUSG00000032342	471.484	-0.15056	0.0811717	-1.85483	0.0636199	0.407411	Mto1	protein_coding
ENSMUSG00000018932	2549.43	0.170871	0.0921383	1.8545	0.063667	0.407411	Map2k3	protein_coding
ENSMUSG00000027968	117.574	0.357577	0.192811	1.85455	0.0636609	0.407411	Larp7	protein_coding
ENSMUSG00000038239	12695.1	0.158261	0.0853737	1.85375	0.0637754	0.407787	Hrc	protein_coding
ENSMUSG00000003038	163.194	0.30137	0.162594	1.85352	0.0638082	0.407787	Hmgn2	protein_coding
ENSMUSG00000020752	97.4875	-0.3175	0.171407	-1.85232	0.0639804	0.408064	Recql5	protein_coding
ENSMUSG00000054676	429.414	-0.179546	0.096915	-1.85261	0.0639378	0.408064	1600014C10Rik	protein_coding
ENSMUSG00000021832	2433.12	0.194314	0.104917	1.85207	0.0640164	0.408064	Psmc6	protein_coding
ENSMUSG00000039542	126.277	0.384418	0.20751	1.85253	0.0639501	0.408064	Ncam1	protein_coding
ENSMUSG00000024622	344.963	-0.175271	0.0947064	-1.85067	0.0642165	0.408812	Hmgxb3	protein_coding
ENSMUSG00000037236	562.18	0.182107	0.0983875	1.85092	0.0641812	0.408812	Matr3	protein_coding
ENSMUSG00000139920	328.947	0.214548	0.115977	1.84991	0.0643262	0.408984	ENSMUSG00000139920	lncRNA
ENSMUSG00000060512	212.219	-0.335346	0.181269	-1.84999	0.0643151	0.408984	0610040J01Rik	protein_coding
ENSMUSG00000021036	141.3	0.316595	0.171236	1.84888	0.0644748	0.409666	Sptlc2	protein_coding
ENSMUSG00000037262	84.0402	0.371659	0.201081	1.8483	0.0645584	0.409933	Kin	protein_coding
ENSMUSG00000041261	166.416	-0.361185	0.195447	-1.84799	0.0646038	0.409958	Car8	protein_coding
ENSMUSG00000045333	217.354	-0.225185	0.121905	-1.84722	0.0647154	0.410404	Zfp423	protein_coding
ENSMUSG00000042548	292.499	-0.302763	0.164036	-1.84571	0.0649347	0.410446	Asxl1	protein_coding
ENSMUSG00000038068	463.112	-0.235607	0.127668	-1.84547	0.0649695	0.410446	Rnf144b	protein_coding
ENSMUSG00000032026	893.405	0.147567	0.0799621	1.84546	0.0649711	0.410446	Rexo2	protein_coding
ENSMUSG00000037851	1733.07	0.162711	0.0881334	1.84619	0.064864	0.410446	Iars1	protein_coding
ENSMUSG00000117284	217.226	0.369373	0.20015	1.84548	0.0649682	0.410446	Gm7072	protein_coding
ENSMUSG00000040254	77.5653	0.666267	0.361023	1.8455	0.0649652	0.410446	Sema3d	protein_coding
ENSMUSG00000057531	457.728	-0.173797	0.094242	-1.84416	0.0651603	0.410593	Dtnbp1	protein_coding
ENSMUSG00000024908	1809.87	0.140823	0.076334	1.84483	0.0650627	0.410593	Ppp6r3	protein_coding
ENSMUSG00000032249	525.408	0.239528	0.129879	1.84424	0.0651476	0.410593	Anp32a	protein_coding
ENSMUSG00000042712	357.553	0.268863	0.145751	1.84468	0.0650848	0.410593	Tceal9	protein_coding
ENSMUSG00000062190	217.896	-0.23055	0.125069	-1.84338	0.0652729	0.410779	Lancl2	protein_coding
ENSMUSG00000022024	1952.47	0.150021	0.0813827	1.8434	0.0652704	0.410779	Sugt1	protein_coding
ENSMUSG00000030421	803.995	-0.177631	0.0964071	-1.84251	0.0654004	0.410798	Uri1	protein_coding
ENSMUSG00000005575	859.068	0.113012	0.061328	1.84275	0.0653652	0.410798	Ube2m	protein_coding
ENSMUSG00000035933	339.135	0.211956	0.115026	1.84267	0.0653774	0.410798	Cog5	protein_coding
ENSMUSG00000085779	1023.94	0.177154	0.0961825	1.84186	0.0654961	0.410808	Atcayos	lncRNA
ENSMUSG00000024393	1795.63	-0.14176	0.0769747	-1.84165	0.0655267	0.410808	Prrc2a	protein_coding
ENSMUSG00000029190	2172.1	0.238109	0.12928	1.84181	0.0655034	0.410808	D5Ertd579e	protein_coding
ENSMUSG00000022314	1706.1	-0.114724	0.062334	-1.84047	0.0656995	0.41111	Rad21	protein_coding
ENSMUSG00000024981	94.8485	0.339056	0.184208	1.84061	0.0656784	0.41111	Acsl5	protein_coding
ENSMUSG00000045624	286.089	0.372043	0.20214	1.84052	0.0656916	0.41111	Esf1	protein_coding
ENSMUSG00000023952	321.623	-0.183894	0.0999402	-1.84004	0.0657629	0.411247	Gtpbp2	protein_coding
ENSMUSG00000023186	703.34	-0.138799	0.0754563	-1.83947	0.0658466	0.41151	Vwa5a	protein_coding
ENSMUSG00000052656	563.753	-0.190777	0.103748	-1.83885	0.0659367	0.411553	Rnf103	protein_coding
ENSMUSG00000020988	842.719	-0.123958	0.0674089	-1.8389	0.0659297	0.411553	L2hgdh	protein_coding
ENSMUSG00000032786	1530.53	-0.17779	0.0967189	-1.83821	0.0660313	0.411884	Alas1	protein_coding
ENSMUSG00000056493	484.116	-0.234119	0.127434	-1.83717	0.0661844	0.412579	Foxk1	protein_coding
ENSMUSG00000095042	226.05	-0.199473	0.108745	-1.83433	0.0666055	0.413381	Gm12537	processed_pseudogene
ENSMUSG00000051339	710.285	-0.166992	0.0910219	-1.83464	0.066559	0.413381	2900026A02Rik	protein_coding
ENSMUSG00000046062	505.222	-0.150615	0.082075	-1.83509	0.0664922	0.413381	Ppp1r15b	protein_coding
ENSMUSG00000037075	844.739	-0.1288	0.0701991	-1.83478	0.0665386	0.413381	Rnf139	protein_coding
ENSMUSG00000000171	2711.83	-0.104929	0.0571624	-1.83562	0.0664133	0.413381	Sdhd	protein_coding
ENSMUSG00000026827	4190.92	0.136908	0.0746279	1.83454	0.0665746	0.413381	Gpd2	protein_coding
ENSMUSG00000025995	276.071	0.177319	0.0966101	1.83541	0.0664456	0.413381	Wdr75	protein_coding
ENSMUSG00000039004	247.847	-0.338383	0.18465	-1.83257	0.0668666	0.413514	Bmp6	protein_coding
ENSMUSG00000064351	1.02636e+06	-0.322856	0.176056	-1.83383	0.0666796	0.413514	mt-Co1	protein_coding
ENSMUSG00000038302	235.915	-0.250307	0.136635	-1.83193	0.0669614	0.413514	Afg1l	protein_coding
ENSMUSG00000053581	181.379	-0.24161	0.131831	-1.83273	0.066843	0.413514	Zfand2a	protein_coding
ENSMUSG00000038763	3178.27	-0.231472	0.126242	-1.83355	0.0667212	0.413514	Alpk3	protein_coding
ENSMUSG00000026020	271.574	0.198747	0.108468	1.83231	0.0669059	0.413514	Nop58	protein_coding
ENSMUSG00000038564	421.673	0.215839	0.117804	1.83218	0.0669251	0.413514	Ift172	protein_coding
ENSMUSG00000067586	106.512	0.34078	0.185975	1.83239	0.0668931	0.413514	S1pr3	protein_coding
ENSMUSG00000031749	975.733	-0.133373	0.0728183	-1.83158	0.0670137	0.413579	St3gal2	protein_coding
ENSMUSG00000056962	238.428	-0.204358	0.111637	-1.83056	0.0671661	0.414066	Jmjd6	protein_coding
ENSMUSG00000037287	434.86	-0.156436	0.0854744	-1.83021	0.0672182	0.414066	Tbcel	protein_coding
ENSMUSG00000033377	553.92	0.187273	0.102318	1.83029	0.0672058	0.414066	Palmd	protein_coding
ENSMUSG00000039231	99.379	-0.32867	0.179617	-1.82984	0.0672734	0.414148	Suv39h1	protein_coding
ENSMUSG00000052419	416.427	-0.227647	0.124438	-1.8294	0.067339	0.414294	Smim30	protein_coding
ENSMUSG00000034998	317.609	-0.232608	0.127298	-1.82727	0.067659	0.415746	Foxn2	protein_coding
ENSMUSG00000056201	546.171	0.197343	0.10799	1.82741	0.0676377	0.415746	Cfl1	protein_coding
ENSMUSG00000078965	235.242	-0.221254	0.121286	-1.82423	0.0681176	0.416051	Gm12033	processed_pseudogene
ENSMUSG00000029683	1786.89	-0.752655	0.412716	-1.82366	0.0682031	0.416051	Lmod2	protein_coding
ENSMUSG00000024312	119.374	-0.279176	0.152935	-1.82546	0.0679319	0.416051	Wdr46	protein_coding
ENSMUSG00000027394	176.827	-0.263617	0.144456	-1.8249	0.0680165	0.416051	Ttl	protein_coding
ENSMUSG00000031231	9745.5	-0.186394	0.102209	-1.82365	0.0682048	0.416051	Cox7b	protein_coding
ENSMUSG00000071253	724.866	-0.177224	0.0971125	-1.82493	0.0680114	0.416051	Slc25a16	protein_coding
ENSMUSG00000042541	1687.09	-0.175959	0.0963638	-1.82599	0.0678521	0.416051	Sem1	protein_coding
ENSMUSG00000024181	554.984	-0.170859	0.0935988	-1.82544	0.0679347	0.416051	Mrpl28	protein_coding
ENSMUSG00000036097	433.548	0.186588	0.102319	1.8236	0.0682133	0.416051	Slf2	protein_coding
ENSMUSG00000032582	273.612	0.26926	0.147563	1.82471	0.0680446	0.416051	Rbm6	protein_coding
ENSMUSG00000031434	99.2787	0.296004	0.162306	1.82374	0.0681909	0.416051	Morc4	protein_coding
ENSMUSG00000026837	543.62	0.376874	0.206562	1.82451	0.0680748	0.416051	Col5a1	protein_coding
ENSMUSG00000028059	260.185	0.226063	0.124087	1.82181	0.0684844	0.417447	Arhgef2	protein_coding
ENSMUSG00000052374	13575.3	-0.491437	0.269832	-1.82127	0.0685662	0.417606	Actn2	protein_coding
ENSMUSG00000041777	64.0746	-0.351024	0.192808	-1.82059	0.0686694	0.417606	Cir1	protein_coding
ENSMUSG00000026308	965.303	-0.269076	0.147957	-1.81861	0.068971	0.417606	Klhl30	protein_coding
ENSMUSG00000002763	155.497	-0.262686	0.144389	-1.81929	0.0688671	0.417606	Pex6	protein_coding
ENSMUSG00000093661	608.727	-0.157389	0.0865445	-1.81858	0.0689748	0.417606	Eif4e3	protein_coding
ENSMUSG00000041769	825.097	-0.143602	0.0788919	-1.82023	0.0687234	0.417606	Ppp2r2d	protein_coding
ENSMUSG00000027282	2002.19	-0.121816	0.0669811	-1.81866	0.0689634	0.417606	Mtch2	protein_coding
ENSMUSG00000026202	9066.1	0.108868	0.0598061	1.82035	0.0687057	0.417606	Tuba4a	protein_coding
ENSMUSG00000033400	20084.2	0.132415	0.0727156	1.82099	0.0686078	0.417606	Agl	protein_coding
ENSMUSG00000001376	600.661	0.140268	0.0770722	1.81996	0.0687655	0.417606	Vps50	protein_coding
ENSMUSG00000059975	149.988	0.23851	0.131126	1.81894	0.0689207	0.417606	Zfp74	protein_coding
ENSMUSG00000038515	95.2899	-0.429407	0.236167	-1.81823	0.0690287	0.417676	Grtp1	protein_coding
ENSMUSG00000085241	113.009	0.322294	0.177396	1.81681	0.0692469	0.418602	Snhg3	lncRNA
ENSMUSG00000032171	292.883	-0.225829	0.124309	-1.81668	0.0692663	0.418602	Pin1	protein_coding
ENSMUSG00000039745	62.7285	0.399289	0.219861	1.81609	0.0693558	0.418887	Htatip2	protein_coding
ENSMUSG00000064127	842.465	-0.18786	0.1035	-1.81507	0.0695134	0.419353	Med14	protein_coding
ENSMUSG00000032562	1136.79	0.149534	0.0823931	1.81488	0.0695421	0.419353	Gnai2	protein_coding
ENSMUSG00000035172	184.637	0.29879	0.164644	1.81476	0.0695601	0.419353	Plekhh3	protein_coding
ENSMUSG00000039509	337.301	-0.177737	0.0979835	-1.81395	0.0696857	0.419717	Nup133	protein_coding
ENSMUSG00000002948	448.43	0.149435	0.0823868	1.81382	0.0697053	0.419717	Map2k7	protein_coding
ENSMUSG00000094708	209.808	-0.246392	0.135885	-1.81324	0.0697949	0.419816	Gm10359	processed_pseudogene
ENSMUSG00000054027	1698.86	-0.154706	0.0853238	-1.81316	0.0698066	0.419816	Nt5dc3	protein_coding
ENSMUSG00000024404	4536.17	0.0946612	0.0522258	1.81254	0.0699029	0.420139	Riok3	protein_coding
ENSMUSG00000024098	1033.87	-0.197209	0.108823	-1.81221	0.0699543	0.420193	Twsg1	protein_coding
ENSMUSG00000025903	1917.14	-0.137693	0.0760683	-1.81012	0.0702766	0.421873	Lypla1	protein_coding
ENSMUSG00000003970	2239.31	0.106452	0.0588249	1.80964	0.0703509	0.422063	Rpl8	protein_coding
ENSMUSG00000030996	3521.51	0.101835	0.056353	1.80708	0.0707495	0.424197	Art1	protein_coding
ENSMUSG00000026778	1237.17	0.150417	0.0832586	1.80662	0.0708215	0.424371	Prkcq	protein_coding
ENSMUSG00000045005	58.7477	-0.376789	0.208617	-1.80613	0.0708986	0.424576	Fzd5	protein_coding
ENSMUSG00000116879	69.4283	-0.373888	0.207077	-1.80555	0.0709884	0.424608	Gm49794	lncRNA
ENSMUSG00000047921	712.277	-0.136304	0.0755034	-1.80527	0.0710327	0.424608	Trappc9	protein_coding
ENSMUSG00000019943	1701.68	0.196623	0.108901	1.80552	0.070994	0.424608	Atp2b1	protein_coding
ENSMUSG00000017421	1290.11	-0.164422	0.0911192	-1.80447	0.0711572	0.425096	Zfp207	protein_coding
ENSMUSG00000001440	1489.71	0.153021	0.0848179	1.80411	0.0712142	0.425179	Kpnb1	protein_coding
ENSMUSG00000030465	604.868	0.186566	0.103488	1.80277	0.0714237	0.426173	Psd3	protein_coding
ENSMUSG00000028191	174.329	-0.230588	0.12803	-1.80105	0.0716951	0.426882	Bcl10	protein_coding
ENSMUSG00000021967	476.016	-0.158063	0.0877501	-1.80128	0.071658	0.426882	Mrpl57	protein_coding
ENSMUSG00000030137	2958.38	-0.12728	0.070675	-1.80092	0.0717151	0.426882	Tuba8	protein_coding
ENSMUSG00000069769	5668.5	-0.12458	0.0691724	-1.801	0.0717025	0.426882	Msi2	protein_coding
ENSMUSG00000054302	373.349	0.173142	0.0961646	1.80048	0.0717855	0.427044	Eapp	protein_coding
ENSMUSG00000020612	2888.8	0.102067	0.0567068	1.7999	0.0718764	0.427071	Prkar1a	protein_coding
ENSMUSG00000056900	5657.78	0.156128	0.0867397	1.79996	0.0718668	0.427071	Usp13	protein_coding
ENSMUSG00000003099	909.961	-0.112596	0.062654	-1.79711	0.0723188	0.428959	Ppp5c	protein_coding
ENSMUSG00000020530	571.542	0.228677	0.127218	1.79752	0.0722529	0.428959	Ggnbp2	protein_coding
ENSMUSG00000018398	343.917	0.254624	0.141688	1.79707	0.0723242	0.428959	Septin8	protein_coding
ENSMUSG00000000561	197.513	-0.219499	0.122227	-1.79583	0.0725209	0.42961	Wdr77	protein_coding
ENSMUSG00000028211	415.371	-0.162329	0.0903879	-1.79592	0.0725073	0.42961	Trp53inp1	protein_coding
ENSMUSG00000040111	193.018	0.240877	0.134188	1.79507	0.0726418	0.430069	Gramd1b	protein_coding
ENSMUSG00000131541	143.679	0.42704	0.238062	1.79382	0.0728418	0.430737	ENSMUSG00000131541	lncRNA
ENSMUSG00000002968	793.312	0.128634	0.0717025	1.79399	0.0728147	0.430737	Med25	protein_coding
ENSMUSG00000060671	114.752	0.32788	0.182841	1.79325	0.0729334	0.431021	Atp8b2	protein_coding
ENSMUSG00000064120	133.846	0.2873	0.160238	1.79296	0.0729797	0.431038	Mocs1	protein_coding
ENSMUSG00000070639	121.915	0.253653	0.141618	1.7911	0.0732768	0.43181	Lrrc8b	protein_coding
ENSMUSG00000058325	196.064	0.285835	0.159553	1.79147	0.0732181	0.43181	Dock1	protein_coding
ENSMUSG00000039997	87.2112	0.347318	0.193918	1.79105	0.0732851	0.43181	Ifi203	protein_coding
ENSMUSG00000022665	348.912	0.538393	0.300514	1.79157	0.0732016	0.43181	Ccdc80	protein_coding
ENSMUSG00000030987	3769.9	-0.179085	0.100063	-1.78971	0.0734998	0.432817	Stim1	protein_coding
ENSMUSG00000038375	9483.22	-0.135579	0.0757996	-1.78864	0.0736722	0.43306	Trp53inp2	protein_coding
ENSMUSG00000030521	254.184	0.280884	0.15703	1.78873	0.0736583	0.43306	Mphosph10	protein_coding
ENSMUSG00000034845	306.129	0.353742	0.197734	1.78899	0.0736172	0.43306	Plvap	protein_coding
ENSMUSG00000078317	65.3665	-0.339332	0.189788	-1.78796	0.0737831	0.433234	F8a	protein_coding
ENSMUSG00000009097	947.094	-0.272567	0.152449	-1.78792	0.0737894	0.433234	Tbx1	protein_coding
ENSMUSG00000005413	102.618	-0.391513	0.219047	-1.78735	0.073881	0.433514	Hmox1	protein_coding
ENSMUSG00000058558	1009.25	0.216447	0.121154	1.78655	0.0740102	0.433991	Rpl5	protein_coding
ENSMUSG00000036501	179.512	0.266823	0.149372	1.7863	0.0740501	0.433991	Fam13b	protein_coding
ENSMUSG00000003477	169.728	-0.506558	0.283758	-1.78518	0.0742328	0.434164	Inmt	protein_coding
ENSMUSG00000025025	1247.82	-0.181039	0.101405	-1.78531	0.0742112	0.434164	Mxi1	protein_coding
ENSMUSG00000093930	535.506	0.188432	0.105539	1.78543	0.0741923	0.434164	Hmgcs1	protein_coding
ENSMUSG00000026377	219.267	0.25916	0.145184	1.78504	0.0742551	0.434164	Nifk	protein_coding
ENSMUSG00000015149	1492.74	-0.103589	0.0580545	-1.78435	0.0743672	0.434563	Sirt2	protein_coding
ENSMUSG00000058503	164.433	0.237615	0.133235	1.78343	0.0745159	0.435175	Fam133b	protein_coding
ENSMUSG00000001150	372.067	0.166583	0.0934605	1.78239	0.0746862	0.435744	Mcm3ap	protein_coding
ENSMUSG00000026737	106.94	0.353363	0.198263	1.78229	0.0747015	0.435744	Pip4k2a	protein_coding
ENSMUSG00000036371	6527.71	0.108173	0.0607032	1.782	0.0747494	0.435766	Serbp1	protein_coding
ENSMUSG00000044177	164.382	-0.357028	0.200458	-1.78106	0.074902	0.435996	Wfikkn2	protein_coding
ENSMUSG00000034853	134.579	-0.270018	0.15158	-1.78136	0.0748541	0.435996	Acot11	protein_coding
ENSMUSG00000001175	15091.3	0.168241	0.0944669	1.78095	0.0749209	0.435996	Calm1	protein_coding
ENSMUSG00000005803	708.681	-0.180573	0.10143	-1.78027	0.0750321	0.436293	Sqor	protein_coding
ENSMUSG00000074746	557.85	-0.133272	0.0748795	-1.77983	0.0751044	0.436293	Pdzd8	protein_coding
ENSMUSG00000032186	295.146	0.389617	0.218875	1.78009	0.0750606	0.436293	Tmod2	protein_coding
ENSMUSG00000029765	137.274	-0.357065	0.201045	-1.77605	0.075725	0.436441	Plxna4	protein_coding
ENSMUSG00000060860	104.859	-0.298123	0.167708	-1.77764	0.0754636	0.436441	Ube2s	protein_coding
ENSMUSG00000038155	161.812	-0.265796	0.149434	-1.77868	0.0752917	0.436441	Gstp2	protein_coding
ENSMUSG00000041390	212.211	-0.258913	0.145732	-1.77664	0.0756282	0.436441	Mdfic	protein_coding
ENSMUSG00000033389	147.741	-0.241151	0.135809	-1.77566	0.0757884	0.436441	Arhgap44	protein_coding
ENSMUSG00000031889	486.38	-0.217184	0.122326	-1.77546	0.0758226	0.436441	Phaf1	protein_coding
ENSMUSG00000020647	921.543	-0.165461	0.0931864	-1.77559	0.0758011	0.436441	Ncoa1	protein_coding
ENSMUSG00000027011	518.636	-0.15056	0.0846238	-1.77916	0.0752128	0.436441	Ube2e3	protein_coding
ENSMUSG00000063358	2704.6	-0.118829	0.0668422	-1.77776	0.0754432	0.436441	Mapk1	protein_coding
ENSMUSG00000024780	1895.6	-0.113653	0.0640043	-1.77571	0.0757801	0.436441	Cdc37l1	protein_coding
ENSMUSG00000015837	6578.52	0.107953	0.0607044	1.77834	0.0753476	0.436441	Sqstm1	protein_coding
ENSMUSG00000038762	1306.51	0.123976	0.0698298	1.7754	0.0758323	0.436441	Abcf1	protein_coding
ENSMUSG00000037685	3515.32	0.149861	0.0843608	1.77643	0.0756617	0.436441	Atp8a1	protein_coding
ENSMUSG00000004085	7610.43	0.15848	0.0892657	1.77538	0.0758356	0.436441	Map3k20	protein_coding
ENSMUSG00000037553	395.177	0.22427	0.126099	1.77853	0.0753174	0.436441	Zdhhc18	protein_coding
ENSMUSG00000057411	67.5601	0.411027	0.231328	1.77682	0.0755984	0.436441	Antkmt	protein_coding
ENSMUSG00000039891	12921.3	-0.17217	0.0969936	-1.77507	0.0758863	0.436479	Txlnb	protein_coding
ENSMUSG00000087579	135.868	0.37637	0.212138	1.77418	0.0760339	0.437073	Hectd2os	lncRNA
ENSMUSG00000114968	61.3836	0.430238	0.24259	1.77351	0.0761434	0.437195	A630019I02Rik	lncRNA
ENSMUSG00000021420	364.707	-0.202455	0.114141	-1.77372	0.0761093	0.437195	Fars2	protein_coding
ENSMUSG00000086825	72.8455	-0.345522	0.194859	-1.77319	0.076197	0.437249	Gm15675	lncRNA
ENSMUSG00000030884	6143.68	-0.147371	0.0831287	-1.7728	0.0762613	0.437364	Uqcrc2	protein_coding
ENSMUSG00000048429	1138.12	-0.128659	0.0726708	-1.77043	0.0766547	0.439111	Timm29	protein_coding
ENSMUSG00000020697	655.515	0.15537	0.0877529	1.77054	0.0766366	0.439111	Lig3	protein_coding
ENSMUSG00000060843	142.932	0.35959	0.20322	1.76946	0.0768166	0.439784	Ctnna3	protein_coding
ENSMUSG00000025465	1607.61	-0.15082	0.0853092	-1.76792	0.0770744	0.441005	Echs1	protein_coding
ENSMUSG00000028949	1745.13	0.116314	0.0658295	1.7669	0.0772442	0.441721	Smarcd3	protein_coding
ENSMUSG00000015337	310.856	-0.208787	0.118253	-1.7656	0.0774633	0.442207	Endog	protein_coding
ENSMUSG00000020333	558.514	-0.180338	0.102139	-1.76562	0.0774597	0.442207	Acsl6	protein_coding
ENSMUSG00000107838	168.929	-0.23355	0.132273	-1.76567	0.0774514	0.442207	Gm45769	TEC
ENSMUSG00000004263	92.08	-0.30426	0.172407	-1.76478	0.0776006	0.442722	Atn1	protein_coding
ENSMUSG00000001700	237.847	-0.209484	0.118722	-1.7645	0.0776481	0.442722	Gramd2b	protein_coding
ENSMUSG00000036256	1309.7	0.232028	0.131515	1.76426	0.0776879	0.442722	Igfbp7	protein_coding
ENSMUSG00000044795	123.683	0.258672	0.146645	1.76394	0.0777418	0.442775	Cyb5d1	protein_coding
ENSMUSG00000025894	436.783	-0.160659	0.0910952	-1.76364	0.0777921	0.442806	Aasdhppt	protein_coding
ENSMUSG00000025137	211.226	-0.238726	0.135417	-1.76289	0.0779194	0.443134	Pcyt2	protein_coding
ENSMUSG00000020064	519.987	0.162064	0.0919371	1.76277	0.0779392	0.443134	Herc4	protein_coding
ENSMUSG00000072501	1561.31	0.128074	0.0726667	1.76248	0.0779876	0.443154	Phf20l1	protein_coding
ENSMUSG00000037415	575.433	-0.214038	0.121558	-1.7608	0.0782728	0.444264	Ranbp10	protein_coding
ENSMUSG00000038250	809.845	-0.153107	0.0869496	-1.76087	0.0782602	0.444264	Usp38	protein_coding
ENSMUSG00000069114	313.305	-0.20866	0.118589	-1.75952	0.07849	0.445207	Zbtb10	protein_coding
ENSMUSG00000052962	825.274	-0.153715	0.0873856	-1.75904	0.0785709	0.445207	Mrpl35	protein_coding
ENSMUSG00000029649	958.403	0.149947	0.0852448	1.75902	0.0785738	0.445207	Pomp	protein_coding
ENSMUSG00000025144	173.592	-0.228789	0.130135	-1.7581	0.0787311	0.445397	Cenpx	protein_coding
ENSMUSG00000018599	605.731	-0.157949	0.0898726	-1.75747	0.0788372	0.445397	Mief2	protein_coding
ENSMUSG00000003814	3395.53	0.126868	0.0721975	1.75724	0.0788775	0.445397	Calr	protein_coding
ENSMUSG00000020463	577.068	0.191816	0.109111	1.75799	0.0787495	0.445397	Ppp4r3b	protein_coding
ENSMUSG00000023886	1813.79	0.205886	0.117155	1.75738	0.0788527	0.445397	Smoc2	protein_coding
ENSMUSG00000037958	187.234	0.26504	0.150717	1.75853	0.0786581	0.445397	Nsrp1	protein_coding
ENSMUSG00000039086	58.0782	-0.367645	0.209255	-1.75692	0.0789316	0.445448	Ss18l1	protein_coding
ENSMUSG00000038563	149.094	-0.226726	0.129222	-1.75454	0.0793378	0.446308	Efl1	protein_coding
ENSMUSG00000018363	1038.12	-0.16809	0.0958099	-1.75441	0.0793608	0.446308	Smurf2	protein_coding
ENSMUSG00000056211	1687.93	-0.16388	0.0934165	-1.75429	0.0793801	0.446308	R3hdm1	protein_coding
ENSMUSG00000045216	450.862	-0.142859	0.0814125	-1.75475	0.079302	0.446308	Hs6st1	protein_coding
ENSMUSG00000059920	1748.45	-0.142612	0.0813051	-1.75403	0.0794245	0.446308	4930453N24Rik	protein_coding
ENSMUSG00000016487	602.457	0.266067	0.151699	1.75392	0.0794448	0.446308	Ppfibp1	protein_coding
ENSMUSG00000027907	144.44	0.405414	0.230958	1.75535	0.0791988	0.446308	S100a11	protein_coding
ENSMUSG00000104235	58.2872	0.777243	0.442863	1.75504	0.0792522	0.446308	Gm37589	TEC
ENSMUSG00000004610	396.153	-0.167003	0.0952545	-1.75323	0.0795627	0.446716	Etfb	protein_coding
ENSMUSG00000029581	127.554	0.299188	0.17071	1.75261	0.0796698	0.447064	Fscn1	protein_coding
ENSMUSG00000025646	148.785	-0.250581	0.143005	-1.75225	0.0797312	0.447155	Atrip	protein_coding
ENSMUSG00000025920	806.633	-0.240725	0.137439	-1.75151	0.0798589	0.447486	Stau2	protein_coding
ENSMUSG00000018293	1163.92	0.130402	0.074457	1.75138	0.0798807	0.447486	Pfn1	protein_coding
ENSMUSG00000021149	705.5	0.170334	0.0973046	1.75052	0.0800285	0.447807	Gtpbp4	protein_coding
ENSMUSG00000006390	86.5815	0.365003	0.208497	1.75064	0.0800086	0.447807	Elovl1	protein_coding
ENSMUSG00000021255	73.5396	-0.470183	0.268706	-1.7498	0.080152	0.447991	Esrrb	protein_coding
ENSMUSG00000064210	944.563	0.179193	0.102404	1.74985	0.0801434	0.447991	Ano6	protein_coding
ENSMUSG00000112964	85.9097	0.355286	0.203139	1.74898	0.0802949	0.448536	E430024I08Rik	lncRNA
ENSMUSG00000037260	397.151	-0.159867	0.0914421	-1.74829	0.0804134	0.448945	Hgsnat	protein_coding
ENSMUSG00000036896	131.092	-0.367286	0.210176	-1.74751	0.0805484	0.449191	C1qc	protein_coding
ENSMUSG00000025437	472.866	0.174212	0.0996865	1.74759	0.0805344	0.449191	Usp33	protein_coding
ENSMUSG00000039206	256.705	-0.256288	0.146706	-1.74695	0.0806468	0.449486	Daglb	protein_coding
ENSMUSG00000025486	204.04	-0.247736	0.141851	-1.74646	0.0807317	0.449707	Sirt3	protein_coding
ENSMUSG00000066036	3965.84	-0.164443	0.094195	-1.74577	0.0808509	0.449988	Ubr4	protein_coding
ENSMUSG00000068039	2496.65	0.183028	0.10488	1.74512	0.0809642	0.449988	Tcp1	protein_coding
ENSMUSG00000020075	784.172	0.225662	0.12929	1.7454	0.0809156	0.449988	Ddx21	protein_coding
ENSMUSG00000051579	250.512	0.253855	0.145458	1.74521	0.0809487	0.449988	Tceal8	protein_coding
ENSMUSG00000021906	473.647	-0.188857	0.108344	-1.74313	0.0813113	0.451664	Oxnad1	protein_coding
ENSMUSG00000015711	1158.07	-0.233871	0.134212	-1.74255	0.0814127	0.451973	Prune1	protein_coding
ENSMUSG00000024269	209.829	-0.257427	0.147787	-1.74189	0.0815285	0.452362	Tpgs2	protein_coding
ENSMUSG00000024997	3237.77	-0.123305	0.0708025	-1.74154	0.0815894	0.452446	Prdx3	protein_coding
ENSMUSG00000030512	133.028	0.266242	0.15296	1.7406	0.0817535	0.453102	Snrpa1	protein_coding
ENSMUSG00000056091	693.648	-0.271246	0.155893	-1.73995	0.0818673	0.453142	St3gal5	protein_coding
ENSMUSG00000050373	160.274	-0.225349	0.129608	-1.7387	0.082087	0.453142	Snx21	protein_coding
ENSMUSG00000050627	557.409	-0.149079	0.0856969	-1.7396	0.0819286	0.453142	Gpd1l	protein_coding
ENSMUSG00000022338	694.483	-0.141803	0.0815676	-1.73847	0.0821272	0.453142	Eny2	protein_coding
ENSMUSG00000031059	3050.83	-0.0909651	0.0523226	-1.73854	0.0821154	0.453142	Ndufb11	protein_coding
ENSMUSG00000029146	368.535	0.168118	0.0966067	1.74023	0.0818191	0.453142	Snx17	protein_coding
ENSMUSG00000028111	102.74	0.355251	0.204306	1.73882	0.0820667	0.453142	Ctsk	protein_coding
ENSMUSG00000039646	82.5099	0.374913	0.215602	1.73891	0.0820504	0.453142	Vasn	protein_coding
ENSMUSG00000031644	114.824	0.290405	0.167153	1.73736	0.0823239	0.453975	Nek1	protein_coding
ENSMUSG00000039050	408.758	-0.144944	0.083463	-1.73663	0.0824534	0.454435	Osbpl2	protein_coding
ENSMUSG00000045176	108.146	-0.294556	0.169687	-1.73587	0.0825861	0.454913	Borcs6	protein_coding
ENSMUSG00000102869	1128.65	0.274515	0.158191	1.73534	0.0826811	0.455183	Norad	lncRNA
ENSMUSG00000033526	2074.86	-0.223189	0.128654	-1.7348	0.0827759	0.455452	Ppip5k1	protein_coding
ENSMUSG00000121001	61.9731	0.600034	0.346029	1.73406	0.0829079	0.455671	Gm57461	lncRNA
ENSMUSG00000036880	2009.88	-0.201272	0.11606	-1.73421	0.0828816	0.455671	Acaa2	protein_coding
ENSMUSG00000030269	312.495	-0.16631	0.0959317	-1.73363	0.0829831	0.455706	Mtmr14	protein_coding
ENSMUSG00000029004	868.137	0.131303	0.0757443	1.7335	0.0830063	0.455706	Kmt2e	protein_coding
ENSMUSG00000010064	828.492	-0.343487	0.198357	-1.73166	0.0833337	0.457249	Slc38a3	protein_coding
ENSMUSG00000085148	205.799	0.204617	0.11824	1.73052	0.0835381	0.457615	Mir22hg	lncRNA
ENSMUSG00000009863	7910.26	-0.210885	0.121863	-1.73051	0.0835392	0.457615	Sdhb	protein_coding
ENSMUSG00000052997	724.159	0.126924	0.0733316	1.73082	0.0834835	0.457615	Uba2	protein_coding
ENSMUSG00000030291	615.883	-0.174658	0.100944	-1.73025	0.083586	0.457618	Med21	protein_coding
ENSMUSG00000085888	1036.35	0.114547	0.0662465	1.7291	0.0837918	0.458491	Gm12224	lncRNA
ENSMUSG00000027395	199.2	-0.206416	0.119467	-1.72781	0.0840224	0.459001	Polr1b	protein_coding
ENSMUSG00000029056	439.15	-0.175041	0.101309	-1.7278	0.0840242	0.459001	Pank4	protein_coding
ENSMUSG00000079111	464.746	0.158193	0.0915308	1.7283	0.0839337	0.459001	Kdelr2	protein_coding
ENSMUSG00000036390	354.732	0.232366	0.134581	1.72659	0.0842414	0.459934	Gadd45a	protein_coding
ENSMUSG00000025172	523.064	-0.78591	0.455323	-1.72605	0.0843384	0.459956	Ankrd2	protein_coding
ENSMUSG00000023852	387.883	0.183132	0.106115	1.72579	0.0843849	0.459956	Chd1	protein_coding
ENSMUSG00000026749	186.865	0.332621	0.192722	1.72591	0.0843637	0.459956	Nek6	protein_coding
ENSMUSG00000025754	405.354	-0.285497	0.165574	-1.72429	0.0846561	0.460246	Agbl1	protein_coding
ENSMUSG00000007415	1210.52	-0.141585	0.0821025	-1.72449	0.0846198	0.460246	Gatad1	protein_coding
ENSMUSG00000031232	935.748	0.129643	0.0751802	1.72443	0.0846297	0.460246	Magt1	protein_coding
ENSMUSG00000069045	1833.37	0.210752	0.12218	1.72493	0.0845408	0.460246	Ddx3y	protein_coding
ENSMUSG00000040794	70.2701	0.362985	0.210523	1.72421	0.0846707	0.460246	C1qtnf4	protein_coding
ENSMUSG00000030805	485.702	0.13663	0.0793217	1.72249	0.0849815	0.461682	Stx4a	protein_coding
ENSMUSG00000095937	225.411	-0.200191	0.116439	-1.71928	0.0855631	0.461798	Gm12671	processed_pseudogene
ENSMUSG00000031204	654.727	-0.25077	0.145829	-1.71961	0.0855025	0.461798	Asb12	protein_coding
ENSMUSG00000058267	943.678	-0.149751	0.0870976	-1.71935	0.0855503	0.461798	Mrps14	protein_coding
ENSMUSG00000038014	3350.94	-0.137708	0.0800143	-1.72104	0.085244	0.461798	Fam120a	protein_coding
ENSMUSG00000036093	1271.01	-0.121198	0.0704117	-1.72128	0.0851995	0.461798	Arl5a	protein_coding
ENSMUSG00000044627	966.581	0.113741	0.0660715	1.72149	0.0851627	0.461798	Swi5	protein_coding
ENSMUSG00000028409	650.805	0.150358	0.0874136	1.72008	0.0854178	0.461798	Smu1	protein_coding
ENSMUSG00000028656	352.152	0.203419	0.11818	1.72127	0.085202	0.461798	Cap1	protein_coding
ENSMUSG00000022505	166.811	0.240262	0.139695	1.7199	0.0854502	0.461798	Emp2	protein_coding
ENSMUSG00000026754	342.707	0.252324	0.146673	1.72032	0.0853744	0.461798	Golga1	protein_coding
ENSMUSG00000074165	142.263	0.295854	0.171822	1.72186	0.0850941	0.461798	Zfp788	protein_coding
ENSMUSG00000041840	127.565	0.383269	0.222778	1.72041	0.0853585	0.461798	Haus1	protein_coding
ENSMUSG00000043872	120.727	0.282605	0.164412	1.71889	0.085635	0.461934	Zmym1	protein_coding
ENSMUSG00000026878	1716.32	-0.139475	0.0811582	-1.71856	0.0856953	0.462008	Rab14	protein_coding
ENSMUSG00000030545	328.472	-0.227823	0.132632	-1.7177	0.0858505	0.462089	Pex11a	protein_coding
ENSMUSG00000028706	282.561	-0.216248	0.125864	-1.71811	0.0857765	0.462089	Nsun4	protein_coding
ENSMUSG00000060098	751.628	-0.14557	0.0847352	-1.71794	0.0858083	0.462089	Prmt7	protein_coding
ENSMUSG00000071054	334.42	0.199379	0.116139	1.71672	0.0860302	0.462804	Safb	protein_coding
ENSMUSG00000057329	109.386	-0.317037	0.184902	-1.71462	0.086415	0.46461	Bcl2	protein_coding
ENSMUSG00000024613	386.784	-0.190292	0.110998	-1.71437	0.0864599	0.46461	Tcof1	protein_coding
ENSMUSG00000028603	817.071	0.119406	0.0697159	1.71275	0.0867581	0.46596	Scp2	protein_coding
ENSMUSG00000053333	278.462	-0.233503	0.136378	-1.71217	0.0868649	0.466039	Dis3l2	protein_coding
ENSMUSG00000030447	694.501	0.194012	0.113314	1.71216	0.086867	0.466039	Cyfip1	protein_coding
ENSMUSG00000063800	180.655	-0.215058	0.125692	-1.71099	0.0870822	0.466074	Prpf38a	protein_coding
ENSMUSG00000033499	2505.47	0.132465	0.0773927	1.71159	0.0869723	0.466074	Larp4b	protein_coding
ENSMUSG00000025762	890.681	0.144531	0.0844672	1.71109	0.0870637	0.466074	Larp1b	protein_coding
ENSMUSG00000023022	328.198	0.255694	0.149454	1.71085	0.0871091	0.466074	Lima1	protein_coding
ENSMUSG00000027778	116.87	0.291326	0.170221	1.71146	0.0869965	0.466074	Ift80	protein_coding
ENSMUSG00000031505	256.86	-0.193295	0.113	-1.71057	0.0871608	0.466098	Naxd	protein_coding
ENSMUSG00000038418	65.8733	-0.51957	0.303798	-1.71025	0.0872204	0.466116	Egr1	protein_coding
ENSMUSG00000020783	165.613	-0.242496	0.141826	-1.70982	0.0872999	0.466116	Ncbp3	protein_coding
ENSMUSG00000033781	352.097	-0.167158	0.0977657	-1.70979	0.0873054	0.466116	Asb13	protein_coding
ENSMUSG00000027405	253.334	0.208568	0.122088	1.70834	0.0875724	0.467289	Nop56	protein_coding
ENSMUSG00000025373	185.042	-0.244694	0.143266	-1.70797	0.0876423	0.46741	Rnf41	protein_coding
ENSMUSG00000027498	358.489	-0.169973	0.0996185	-1.70624	0.0879641	0.468161	Cstf1	protein_coding
ENSMUSG00000016528	3605.04	-0.102564	0.0601307	-1.70568	0.088067	0.468161	Mapkapk2	protein_coding
ENSMUSG00000032479	9982.58	0.138719	0.0813207	1.70582	0.0880408	0.468161	Map4	protein_coding
ENSMUSG00000024566	306.969	0.179672	0.105324	1.7059	0.0880274	0.468161	Atp9b	protein_coding
ENSMUSG00000032557	242.301	0.24094	0.141187	1.70653	0.0879098	0.468161	Uba5	protein_coding
ENSMUSG00000032011	206.099	0.358422	0.210082	1.7061	0.0879888	0.468161	Thy1	protein_coding
ENSMUSG00000097989	164.07	-0.242039	0.141925	-1.7054	0.0881196	0.468189	Gm4335	processed_pseudogene
ENSMUSG00000089838	99.8561	-0.315787	0.18522	-1.70493	0.0882079	0.468193	Gm2962	processed_pseudogene
ENSMUSG00000035351	91.356	-0.304411	0.178552	-1.70489	0.0882151	0.468193	Nup37	protein_coding
ENSMUSG00000005506	1814.97	-0.14926	0.0876369	-1.70316	0.0885384	0.469406	Celf1	protein_coding
ENSMUSG00000032198	215.28	0.271844	0.159611	1.70316	0.088538	0.469406	Dock6	protein_coding
ENSMUSG00000033124	1243.9	-0.140189	0.0823381	-1.7026	0.0886425	0.469454	Atg9a	protein_coding
ENSMUSG00000023048	263.189	0.189519	0.111297	1.70281	0.088603	0.469454	Prr13	protein_coding
ENSMUSG00000039840	761.646	-0.121666	0.071483	-1.70203	0.0887498	0.469519	Epg5	protein_coding
ENSMUSG00000044864	156.206	0.299501	0.175943	1.70227	0.0887052	0.469519	Ankrd50	protein_coding
ENSMUSG00000089911	285.419	-0.177892	0.104539	-1.70168	0.0888155	0.469593	Mfsd14a	protein_coding
ENSMUSG00000017999	129.27	0.239207	0.14059	1.70145	0.0888586	0.469593	Ddx27	protein_coding
ENSMUSG00000040732	136.873	0.25841	0.151922	1.70094	0.0889536	0.469844	Erg	protein_coding
ENSMUSG00000001552	1063.13	0.130967	0.0770089	1.70067	0.089005	0.469865	Jup	protein_coding
ENSMUSG00000028270	142.56	0.275661	0.162199	1.69953	0.0892192	0.470744	Gbp2	protein_coding
ENSMUSG00000015094	111.668	0.331259	0.194983	1.69891	0.0893355	0.471107	Npdc1	protein_coding
ENSMUSG00000079614	388.741	-0.190392	0.112131	-1.69794	0.0895186	0.471821	Seh1l	protein_coding
ENSMUSG00000031561	381.057	-0.232878	0.137277	-1.69641	0.0898092	0.472362	Tenm3	protein_coding
ENSMUSG00000000581	789.327	-0.171356	0.101017	-1.6963	0.0898283	0.472362	C1d	protein_coding
ENSMUSG00000025939	221.162	0.229095	0.135069	1.69614	0.08986	0.472362	Ube2w	protein_coding
ENSMUSG00000095362	109.59	0.29258	0.17245	1.6966	0.0897716	0.472362	Gm14325	protein_coding
ENSMUSG00000026768	62.0302	0.409504	0.241415	1.69627	0.0898353	0.472362	Itga8	protein_coding
ENSMUSG00000063142	1210.33	0.145407	0.0857549	1.69561	0.0899603	0.472638	Kcnma1	protein_coding
ENSMUSG00000038121	2955.68	-0.174331	0.102911	-1.694	0.0902652	0.473988	Fam210a	protein_coding
ENSMUSG00000069919	479.633	-0.377079	0.222691	-1.69328	0.0904022	0.474456	Hba-a1	protein_coding
ENSMUSG00000034509	201.605	-0.268619	0.158697	-1.69265	0.090522	0.474603	Mad2l1bp	protein_coding
ENSMUSG00000025545	680.727	-0.134815	0.0796482	-1.69263	0.0905262	0.474603	Clybl	protein_coding
ENSMUSG00000081494	131.406	-0.284018	0.168006	-1.69052	0.0909285	0.47487	Gm14130	processed_pseudogene
ENSMUSG00000019792	81.9602	-0.310151	0.183416	-1.69097	0.0908425	0.47487	Trmt11	protein_coding
ENSMUSG00000039081	319.887	-0.258535	0.152981	-1.68999	0.0910307	0.47487	Zfp503	protein_coding
ENSMUSG00000040521	147.658	-0.218943	0.129476	-1.691	0.0908374	0.47487	Tsfm	protein_coding
ENSMUSG00000022858	362.493	-0.163457	0.09669	-1.69053	0.0909265	0.47487	Tra2b	protein_coding
ENSMUSG00000004264	1010.46	-0.110709	0.065514	-1.68985	0.0910572	0.47487	Phb2	protein_coding
ENSMUSG00000021898	2090.46	0.0949583	0.0561692	1.69058	0.0909177	0.47487	Asb14	protein_coding
ENSMUSG00000067367	277.814	0.200506	0.118615	1.6904	0.0909517	0.47487	Lyar	protein_coding
ENSMUSG00000032714	87.9012	0.282064	0.166912	1.6899	0.0910475	0.47487	Syde1	protein_coding
ENSMUSG00000054708	91.6075	0.366793	0.216795	1.69189	0.0906663	0.47487	Ankrd24	protein_coding
ENSMUSG00000022462	2814.21	-0.196998	0.116634	-1.68903	0.0912129	0.475432	Slc38a2	protein_coding
ENSMUSG00000038831	82.5711	-0.313425	0.185658	-1.68818	0.0913759	0.47553	Ralgps1	protein_coding
ENSMUSG00000021987	1612.55	0.132192	0.0782913	1.68846	0.0913234	0.47553	Mtmr6	protein_coding
ENSMUSG00000041992	138.464	0.232277	0.137572	1.6884	0.0913341	0.47553	Rapgef5	protein_coding
ENSMUSG00000034908	777.368	0.15649	0.0927173	1.68782	0.0914456	0.475642	Sidt2	protein_coding
ENSMUSG00000039067	2273.04	0.0999038	0.0592028	1.68748	0.0915104	0.475729	Psmd7	protein_coding
ENSMUSG00000133849	228.538	0.207493	0.12312	1.6853	0.0919304	0.475954	ENSMUSG00000133849	lncRNA
ENSMUSG00000044167	710.595	-0.325494	0.193271	-1.68413	0.092156	0.475954	Foxo1	protein_coding
ENSMUSG00000033909	301.052	-0.186354	0.110597	-1.68498	0.0919918	0.475954	Usp36	protein_coding
ENSMUSG00000022812	2150.3	-0.161938	0.0961617	-1.68401	0.0921792	0.475954	Gsk3b	protein_coding
ENSMUSG00000001424	621.026	-0.143515	0.085104	-1.68635	0.0917292	0.475954	Snd1	protein_coding
ENSMUSG00000025354	406.823	-0.139395	0.0826441	-1.68669	0.0916627	0.475954	Dnajc14	protein_coding
ENSMUSG00000018846	1082.14	-0.13734	0.0815061	-1.68503	0.0919823	0.475954	Pank3	protein_coding
ENSMUSG00000042298	1039.82	-0.131501	0.0780584	-1.68465	0.0920559	0.475954	Ttc19	protein_coding
ENSMUSG00000028180	1266.25	0.107087	0.0635097	1.68616	0.0917658	0.475954	Zranb2	protein_coding
ENSMUSG00000041408	997.985	0.134666	0.0799486	1.68441	0.0921025	0.475954	Wapl	protein_coding
ENSMUSG00000021681	479.137	0.138055	0.0819009	1.68564	0.091866	0.475954	Aggf1	protein_coding
ENSMUSG00000020722	2341.05	0.168797	0.100189	1.68478	0.0920311	0.475954	Cacng1	protein_coding
ENSMUSG00000023913	1694.48	0.334654	0.198491	1.68599	0.091797	0.475954	Pla2g7	protein_coding
ENSMUSG00000005882	1577.28	0.121564	0.0721993	1.68373	0.0922336	0.475987	Uqcc1	protein_coding
ENSMUSG00000089781	145.491	-0.23231	0.137998	-1.68343	0.0922911	0.476036	Gm15756	lncRNA
ENSMUSG00000003382	279.982	-0.197439	0.117325	-1.68284	0.0924055	0.476377	Etv3	protein_coding
ENSMUSG00000041632	387.502	-0.160434	0.0953666	-1.68229	0.092513	0.476589	Mrps27	protein_coding
ENSMUSG00000026753	1632.07	-0.120352	0.071558	-1.68189	0.0925911	0.476589	Ppp6c	protein_coding
ENSMUSG00000019467	113.413	0.259889	0.154507	1.68205	0.0925587	0.476589	Arhgef25	protein_coding
ENSMUSG00000049287	78.6107	-0.328971	0.195707	-1.68094	0.0927742	0.477283	Iba57	protein_coding
ENSMUSG00000045954	1275.68	0.176158	0.104813	1.68069	0.0928235	0.477289	Cavin2	protein_coding
ENSMUSG00000052276	198.06	-0.5054	0.300933	-1.67944	0.093066	0.477814	Ostn	protein_coding
ENSMUSG00000025366	431.265	0.166182	0.0989305	1.67978	0.0929995	0.477814	Esyt1	protein_coding
ENSMUSG00000035401	333.481	0.166501	0.0991423	1.67942	0.0930707	0.477814	Emsy	protein_coding
ENSMUSG00000044786	204.941	-0.321796	0.191649	-1.67909	0.0931355	0.477899	Zfp36	protein_coding
ENSMUSG00000033111	184.687	0.217849	0.12977	1.67872	0.0932058	0.478012	Cep15	protein_coding
ENSMUSG00000113178	1815.88	0.238688	0.142255	1.67789	0.0933688	0.4786	Mylf-ps	processed_pseudogene
ENSMUSG00000043822	394.142	-0.296429	0.176801	-1.67663	0.0936158	0.478873	Adamtsl5	protein_coding
ENSMUSG00000022594	1721.56	-0.182765	0.108998	-1.67677	0.093588	0.478873	Lynx1	protein_coding
ENSMUSG00000000711	856.422	-0.134415	0.0801461	-1.67713	0.0935175	0.478873	Rab5b	protein_coding
ENSMUSG00000069135	283.281	0.183731	0.109563	1.67695	0.0935517	0.478873	Cep43	protein_coding
ENSMUSG00000032127	440.014	-0.153858	0.0917901	-1.67619	0.0937005	0.479059	Vps11	protein_coding
ENSMUSG00000020228	118.675	-0.251717	0.150232	-1.67553	0.0938311	0.479479	Helb	protein_coding
ENSMUSG00000024507	787.344	-0.124592	0.0743929	-1.67478	0.0939765	0.479974	Hsd17b4	protein_coding
ENSMUSG00000039741	114.755	-0.283418	0.1693	-1.67406	0.0941193	0.480455	Bahcc1	protein_coding
ENSMUSG00000045211	114.961	-0.350994	0.209735	-1.67352	0.0942259	0.480751	Nudt18	protein_coding
ENSMUSG00000027957	211.903	-0.224815	0.134376	-1.67303	0.094322	0.480993	Slc35a3	protein_coding
ENSMUSG00000031198	5623.34	-0.132115	0.0790314	-1.67168	0.0945872	0.482098	Fundc2	protein_coding
ENSMUSG00000117545	204.308	0.380016	0.227571	1.66987	0.0949441	0.482257	Gm30794	lncRNA
ENSMUSG00000039960	271.275	-0.473926	0.283611	-1.67104	0.094713	0.482257	Rhou	protein_coding
ENSMUSG00000039308	88.6014	-0.325655	0.195027	-1.6698	0.0949597	0.482257	Ndst2	protein_coding
ENSMUSG00000021650	555.009	-0.132588	0.0793688	-1.67053	0.094815	0.482257	Ptcd2	protein_coding
ENSMUSG00000024969	505.689	0.132599	0.0794092	1.66983	0.0949538	0.482257	Mark2	protein_coding
ENSMUSG00000069763	317.383	0.269388	0.16129	1.6702	0.0948792	0.482257	Tmem100	protein_coding
ENSMUSG00000032024	104.113	0.417597	0.250037	1.67014	0.0948918	0.482257	Clmp	protein_coding
ENSMUSG00000023988	335.418	-0.17992	0.107833	-1.6685	0.0952159	0.483062	Bysl	protein_coding
ENSMUSG00000035086	791.602	0.129233	0.077445	1.6687	0.0951765	0.483062	Becn1	protein_coding
ENSMUSG00000018927	211.198	-0.543869	0.326256	-1.667	0.095514	0.483626	Ccl6	protein_coding
ENSMUSG00000035578	76.8329	-0.322856	0.193687	-1.6669	0.0955346	0.483626	Iqcg	protein_coding
ENSMUSG00000030509	220.056	-0.183511	0.110074	-1.66716	0.0954834	0.483626	Asb7	protein_coding
ENSMUSG00000036550	1403.34	0.153374	0.0920462	1.66627	0.0956595	0.483626	Cnot1	protein_coding
ENSMUSG00000025997	342.912	0.309011	0.185441	1.66636	0.0956418	0.483626	Ikzf2	protein_coding
ENSMUSG00000004098	169.956	0.332899	0.199793	1.66622	0.0956693	0.483626	Col5a3	protein_coding
ENSMUSG00000051527	128.67	0.333004	0.199852	1.66626	0.0956624	0.483626	Usp29	protein_coding
ENSMUSG00000010057	146.844	-0.241264	0.144854	-1.66557	0.0957998	0.483855	Nprl2	protein_coding
ENSMUSG00000020315	4377.46	0.168624	0.101245	1.6655	0.0958125	0.483855	Sptbn1	protein_coding
ENSMUSG00000021737	2313.47	0.0953975	0.0573059	1.6647	0.0959717	0.484165	Psmd6	protein_coding
ENSMUSG00000024427	122.508	0.308686	0.185427	1.66473	0.0959667	0.484165	Spry4	protein_coding
ENSMUSG00000034205	323.021	0.290446	0.174556	1.66391	0.09613	0.484413	Loxl2	protein_coding
ENSMUSG00000020380	106.724	0.313523	0.188406	1.66408	0.0960965	0.484413	Rad50	protein_coding
ENSMUSG00000037406	265.563	1.12711	0.677461	1.66372	0.0961676	0.484413	Htra4	protein_coding
ENSMUSG00000028608	384.039	0.15587	0.0937543	1.66254	0.096404	0.485356	Czib	protein_coding
ENSMUSG00000048126	994.38	0.372858	0.224322	1.66215	0.0964818	0.485501	Col6a3	protein_coding
ENSMUSG00000028614	238.763	-0.200308	0.120558	-1.66151	0.0966119	0.485517	Ndc1	protein_coding
ENSMUSG00000027472	973.82	0.123875	0.0745578	1.66146	0.0966201	0.485517	Pdrg1	protein_coding
ENSMUSG00000022801	433.45	0.143213	0.0861998	1.6614	0.0966322	0.485517	Lrch3	protein_coding
ENSMUSG00000056899	83.1271	-0.367454	0.221209	-1.66111	0.0966906	0.485564	Immp2l	protein_coding
ENSMUSG00000073590	71.559	0.307321	0.185266	1.65881	0.0971539	0.486409	3222401L13Rik	lncRNA
ENSMUSG00000023156	64.1689	-0.368386	0.22205	-1.65902	0.0971108	0.486409	Rpp14	protein_coding
ENSMUSG00000027425	335.351	-0.175108	0.105563	-1.65881	0.097154	0.486409	Kat14	protein_coding
ENSMUSG00000028345	315.063	-0.16682	0.100539	-1.65926	0.0970642	0.486409	Tex10	protein_coding
ENSMUSG00000008682	1527.66	0.126794	0.0764307	1.65894	0.0971284	0.486409	Rpl10	protein_coding
ENSMUSG00000057280	324.346	0.229375	0.138227	1.65941	0.097033	0.486409	Musk	protein_coding
ENSMUSG00000032114	1561.64	0.185427	0.111868	1.65755	0.0974084	0.487436	Slc37a4	protein_coding
ENSMUSG00000003546	125.624	-0.252124	0.152186	-1.65669	0.0975828	0.487756	Klc4	protein_coding
ENSMUSG00000021661	269.019	-0.16857	0.101772	-1.65634	0.0976522	0.487756	Ankra2	protein_coding
ENSMUSG00000022013	1029.31	-0.115851	0.069928	-1.65672	0.097577	0.487756	Dnajc15	protein_coding
ENSMUSG00000027695	103.02	0.296121	0.178789	1.65626	0.0976695	0.487756	Pld1	protein_coding
ENSMUSG00000118449	91.9059	-0.278105	0.16796	-1.65577	0.0977675	0.487999	Gm3625	lncRNA
ENSMUSG00000066306	837.162	0.144925	0.0875409	1.65551	0.0978205	0.488017	Numa1	protein_coding
ENSMUSG00000038069	147.29	-0.228888	0.138282	-1.65522	0.0978798	0.488067	Cdkn2aip	protein_coding
ENSMUSG00000031097	151226	-0.108911	0.0658125	-1.65487	0.09795	0.488171	Tnni2	protein_coding
ENSMUSG00000014778	312.823	-0.198499	0.120008	-1.65405	0.0981169	0.488297	Fhod1	protein_coding
ENSMUSG00000062077	2852.65	0.133947	0.0809829	1.65402	0.0981234	0.488297	Trim54	protein_coding
ENSMUSG00000028843	158.454	0.245541	0.148449	1.65405	0.0981181	0.488297	Sh3bgrl3	protein_coding
ENSMUSG00000022350	709.67	0.206588	0.124988	1.65287	0.0983582	0.489219	Washc5	protein_coding
ENSMUSG00000006273	1152.7	-0.154551	0.093556	-1.65196	0.0985419	0.489412	Atp6v1b2	protein_coding
ENSMUSG00000000127	232.468	0.207644	0.125696	1.65195	0.0985452	0.489412	Fer	protein_coding
ENSMUSG00000063334	527.68	0.250755	0.151789	1.652	0.0985354	0.489412	Krr1	protein_coding
ENSMUSG00000025270	94.1168	-0.477777	0.289386	-1.651	0.0987379	0.489631	Alas2	protein_coding
ENSMUSG00000033306	953.118	0.127239	0.0770618	1.65112	0.0987132	0.489631	Lpp	protein_coding
ENSMUSG00000034342	269.633	0.195278	0.118264	1.6512	0.0986987	0.489631	Cbl	protein_coding
ENSMUSG00000020423	218.896	-0.354011	0.21446	-1.65071	0.0987973	0.48968	Btg2	protein_coding
ENSMUSG00000026437	70.44	-0.39608	0.240012	-1.65025	0.0988916	0.489902	Cdk18	protein_coding
ENSMUSG00000020153	3577.73	-0.124506	0.0754604	-1.64994	0.0989542	0.489967	Ndufs7	protein_coding
ENSMUSG00000037523	710.287	-0.154646	0.0937967	-1.64874	0.0992009	0.490025	Mavs	protein_coding
[truncated: 11,952 more rows]

## Sheet: Overlapping
Relaxed overlap P525L cord and TA, concordant genes (153)	Gene_name	log2FC cord	p cord	padj cord	log2FC TA	p TA	padj TA	Mitochondrion GO:0005739			shared transcriptome (12914) for ORA
ENSMUSG00000020349	Ppp2ca	-0.199846	0.00440906	0.130447	-0.433199	3.30284e-11	6.53501e-08				ENSMUSG00002076161
ENSMUSG00000101111	Gm28437	-0.214821	0.0182949	0.242532	-0.419226	8.89849e-09	8.80328e-06				ENSMUSG00002076083
ENSMUSG00000024259	Slc25a46	-0.156689	0.00253928	0.104506	-0.317124	4.31678e-07	0.000237255	mitochondrion			ENSMUSG00002075795
ENSMUSG00000028033	Kcnq5	-0.325953	0.0243586	0.274954	-0.776712	7.22955e-07	0.000357609				ENSMUSG00002075551
ENSMUSG00000042444	Mindy2	-0.164059	0.0369764	0.321214	-0.331728	1.89419e-06	0.000791005				ENSMUSG00002075524
ENSMUSG00000062373	Tmem65	-0.238295	0.00348779	0.117797	-0.47885	3.56853e-05	0.00802351	mitochondrion			ENSMUSG00002075501
ENSMUSG00000029361	Nos1	-0.27514	0.0262739	0.285147	-0.351006	4.35658e-05	0.00893661	mitochondrion			ENSMUSG00002075188
ENSMUSG00000006262	Mob1b	-0.214209	0.0185555	0.244189	-0.334791	4.59311e-05	0.00908792				ENSMUSG00000144291
ENSMUSG00000032330	Cox7a2	-0.141805	0.0486124	0.355872	-0.244435	4.80216e-05	0.00931525	mitochondrion			ENSMUSG00000144223
ENSMUSG00000026103	Gls	-0.179243	0.04492	0.344783	-0.306743	0.000109374	0.0150283	mitochondrion			ENSMUSG00000144212
ENSMUSG00000027099	Mtx2	-0.223336	0.0267914	0.287747	-0.504885	0.000126919	0.0163066	mitochondrion			ENSMUSG00000144194
ENSMUSG00000051495	Irf2bp2	-0.126438	0.021223	0.254211	-0.37689	0.00025287	0.0231633				ENSMUSG00000144053
ENSMUSG00000001891	Ugp2	-0.11716	0.046746	0.349765	-0.348125	0.000353103	0.0288698				ENSMUSG00000143907
ENSMUSG00000034040	Galnt17	-0.315946	0.00134511	0.0823565	-0.585056	0.000440779	0.0321202				ENSMUSG00000143530
ENSMUSG00000038462	Uqcrfs1	-0.169966	0.039197	0.328466	-0.346926	0.000488539	0.0342774	mitochondrion			ENSMUSG00000143481
ENSMUSG00000027698	Nceh1	-0.126929	0.0282526	0.290705	-0.54009	0.000525841	0.035473				ENSMUSG00000143385
ENSMUSG00000034158	Lrrc58	-0.20864	0.00443258	0.130447	-0.364969	0.000728217	0.0421301				ENSMUSG00000143322
ENSMUSG00000004789	Dlst	-0.112734	0.0349356	0.314316	-0.206757	0.000939738	0.0486745	mitochondrion			ENSMUSG00000141942
ENSMUSG00000043683	Fem1a	-0.206645	0.007343	0.159322	-0.306126	0.000946104	0.048749	mitochondrion			ENSMUSG00000141850
ENSMUSG00000064360	mt-Nd3	-0.179066	0.0251223	0.277816	-0.502138	0.00138605	0.0609429	mitochondrion			ENSMUSG00000141779
ENSMUSG00000029776	Hibadh	-0.242137	0.00543159	0.140701	-0.283876	0.00193191	0.072461	mitochondrion			ENSMUSG00000141774
ENSMUSG00000020844	Nxn	-0.347017	0.000693752	0.0610438	-0.350238	0.00196073	0.0724664				ENSMUSG00000141751
ENSMUSG00000063015	Ccni	-0.228756	0.0156326	0.22685	-0.272384	0.00198508	0.0724664				ENSMUSG00000141422
ENSMUSG00000026568	Mpc2	-0.206636	0.04596	0.347481	-0.240158	0.00197132	0.0724664	mitochondrion			ENSMUSG00000140944
ENSMUSG00000018102	H2bc4	-0.248286	0.00570691	0.143022	-0.289906	0.00255795	0.0864558				ENSMUSG00000140760
ENSMUSG00000046603	Tcaim	-0.20213	0.0428013	0.337497	-0.283613	0.00263504	0.0870727	mitochondrion			ENSMUSG00000140700
ENSMUSG00000010914	Pdhx	-0.194514	0.048999	0.357248	-0.276822	0.00270016	0.0881606	mitochondrion			ENSMUSG00000140518
ENSMUSG00000037656	Slc20a2	-0.239812	2.26163e-05	0.0113044	-0.24419	0.00280055	0.0902471				ENSMUSG00000140457
ENSMUSG00000032902	Slc16a1	-0.196837	0.00354901	0.117825	-0.345933	0.00299572	0.0936631	mitochondrion			ENSMUSG00000140438
ENSMUSG00000024642	Tle4	-0.257042	0.0222485	0.261548	-0.359104	0.00321705	0.0961518				ENSMUSG00000140077
ENSMUSG00000016409	Nkap	-0.171777	0.0460803	0.347806	-0.279152	0.00317271	0.0961518				ENSMUSG00000139989
ENSMUSG00000031924	Cyb5b	-0.203842	1.32277e-06	0.00198947	-0.177368	0.00403385	0.110845	mitochondrion			ENSMUSG00000139920
ENSMUSG00000025971	Maip1	-0.342379	0.000544103	0.0589794	-0.366125	0.00525816	0.12836	mitochondrion			ENSMUSG00000139891
ENSMUSG00000027004	Frzb	-0.349999	0.000307494	0.0493183	-0.596871	0.00530416	0.12855				ENSMUSG00000139771
ENSMUSG00000013275	Slc41a1	-0.151916	0.00103312	0.0726173	-0.360432	0.0245157	0.263894				ENSMUSG00000138224
ENSMUSG00000012422	Tmem167	-0.253516	0.000818347	0.0663303	-0.28393	0.0258872	0.26957				ENSMUSG00000138173
ENSMUSG00000075470	Alg10b	-0.259582	0.00192164	0.0987942	-0.217273	0.0309139	0.293872				ENSMUSG00000138098
ENSMUSG00000092341	Malat1	0.382211	0.000620594	0.0610438	1.10348	8.44872e-32	8.35832e-28				ENSMUSG00000138082
ENSMUSG00000021268	Meg3	0.672834	3.43091e-07	0.00102893	1.11693	2.14613e-08	1.78406e-05				ENSMUSG00000137581
ENSMUSG00000026305	Lrrfip1	0.264321	0.0160444	0.229859	0.497249	4.13801e-08	3.14903e-05				ENSMUSG00000137576
ENSMUSG00000019841	Rev3l	0.265218	0.0199184	0.248454	0.516954	1.91066e-06	0.000791005				ENSMUSG00000136672
ENSMUSG00000040297	Suco	0.251195	0.00092917	0.0693071	0.463367	3.42053e-06	0.00116687				ENSMUSG00000136525
ENSMUSG00000033004	Mycbp2	0.210862	0.000932106	0.0693071	0.368194	1.12433e-05	0.00317801				ENSMUSG00000136485
ENSMUSG00000039103	Nexn	0.528479	0.00140177	NA	0.611119	4.39823e-05	0.00893661				ENSMUSG00000136128
ENSMUSG00000101609	Kcnq1ot1	0.708529	7.22511e-06	0.00650043	1.01012	6.6341e-05	0.0111498				ENSMUSG00000136089
ENSMUSG00000002265	Peg3	0.494745	0.000523383	0.0582542	0.630029	8.56612e-05	0.0130376				ENSMUSG00000135994
ENSMUSG00000022443	Myh9	0.18794	0.0327357	0.305272	0.32652	8.74916e-05	0.013107				ENSMUSG00000135833
ENSMUSG00000034243	Golgb1	0.394365	0.000242494	0.0436344	0.710768	9.11034e-05	0.0132497				ENSMUSG00000135622
ENSMUSG00000030616	Sytl2	0.374449	0.00210135	0.0991677	0.990131	0.000115692	0.0153829				ENSMUSG00000135460
ENSMUSG00000040407	Akap9	0.463367	1.12463e-05	0.00843193	0.867288	0.00014522	0.0177365				ENSMUSG00000135048
ENSMUSG00000035649	Zcchc7	0.230709	0.0195249	0.247068	0.412733	0.000149002	0.0179766				ENSMUSG00000134655
ENSMUSG00000017485	Top2b	0.210198	0.0305854	0.297489	0.313524	0.000154513	0.0184168				ENSMUSG00000134304
ENSMUSG00000067851	Arfgef1	0.296906	0.00211226	0.0991677	0.282215	0.000179926	0.0185341				ENSMUSG00000134282
ENSMUSG00000056342	Usp34	0.305361	0.00445662	0.130447	0.32084	0.000178538	0.0185341				ENSMUSG00000134258
ENSMUSG00000045962	Wnk1	0.171189	0.0112995	0.199814	0.341337	0.000171518	0.0185341				ENSMUSG00000134226
ENSMUSG00000035173	Ccdc186	0.452766	0.000542774	0.0589794	0.491425	0.000178752	0.0185341				ENSMUSG00000134155
ENSMUSG00000028649	Macf1	0.365041	0.000142704	0.0320976	0.614097	0.000199076	0.0198935				ENSMUSG00000133849
ENSMUSG00000028559	Osbpl9	0.23003	0.0467948	0.349765	0.371383	0.000206864	0.0202624				ENSMUSG00000133770
ENSMUSG00000030795	Fus	0.369977	1.31739e-06	0.00198947	0.571072	0.000211911	0.0203538				ENSMUSG00000133704
ENSMUSG00000040666	Sh3bgr	0.209697	0.036373	0.319266	0.305259	0.000252614	0.0231633				ENSMUSG00000133630
ENSMUSG00000049550	Clip1	0.361242	0.00266681	0.105697	0.503911	0.000266258	0.0239463				ENSMUSG00000133541
ENSMUSG00000005610	Eif4g2	0.116699	0.0327757	0.305272	0.207763	0.000319975	0.0272889				ENSMUSG00000133280
ENSMUSG00000041415	Dicer1	0.283481	0.0244493	0.274954	0.269752	0.000339277	0.0282056				ENSMUSG00000132896
ENSMUSG00000032301	Psma4	0.207609	0.0452528	0.344783	0.275869	0.000366218	0.0289839				ENSMUSG00000132887
ENSMUSG00000024493	Lars1	0.392411	0.0189029	0.244566	0.33143	0.00036583	0.0289839				ENSMUSG00000132705
ENSMUSG00000097119	B230354K17Rik	0.477996	0.00763946	0.159472	0.446866	0.000363168	0.0289839				ENSMUSG00000132209
ENSMUSG00000038126	Mphosph9	0.335709	0.000856217	0.0685433	0.606206	0.000372646	0.0291648				ENSMUSG00000132147
ENSMUSG00000024991	Eif3a	0.318199	0.0155847	0.226696	0.456357	0.000421723	0.0316069				ENSMUSG00000131626
ENSMUSG00000058135	Gstm1	0.242688	0.012766	0.209997	0.273938	0.000442202	0.0321202				ENSMUSG00000131459
ENSMUSG00000014195	Dnajc7	0.320606	0.00501348	0.137732	0.327623	0.00043572	0.0321202				ENSMUSG00000131217
ENSMUSG00000022016	Akap11	0.236427	0.012661	0.209997	0.416286	0.000536411	0.0358562				ENSMUSG00000131104
ENSMUSG00000024290	Rock1	0.221799	0.0403202	0.332441	0.436739	0.000593418	0.0381213				ENSMUSG00000130984
ENSMUSG00000021945	Zmym2	0.295839	0.0123901	0.208676	0.413407	0.000600671	0.0382588				ENSMUSG00000130860
ENSMUSG00000022361	Zhx1	0.290501	0.0157739	0.227443	0.451913	0.000667654	0.0407722				ENSMUSG00000130727
ENSMUSG00000021843	Ktn1	0.331205	0.0142329	0.216673	0.472044	0.000660005	0.0407722				ENSMUSG00000130701
ENSMUSG00000078671	Chd2	0.360894	0.0063414	0.149474	0.343338	0.00068563	0.0413019				ENSMUSG00000130670
ENSMUSG00000029309	Sparcl1	0.180998	0.0233825	0.26827	0.402643	0.000712846	0.0419773				ENSMUSG00000130659
ENSMUSG00000030655	Smg1	0.197224	0.00214935	0.0991677	0.357157	0.00072736	0.0421301				ENSMUSG00000130134
ENSMUSG00000021068	Nin	0.389158	0.0196804	0.247292	0.474849	0.000772013	0.0438938				ENSMUSG00000130020
ENSMUSG00000022914	Brwd1	0.265931	0.00382686	0.121698	0.476437	0.000805662	0.0447776				ENSMUSG00000129910
ENSMUSG00000006998	Psmd2	0.107352	0.0157749	0.227443	0.166422	0.000930667	0.0485355				ENSMUSG00000129688
ENSMUSG00000026131	Dst	0.473428	3.40936e-09	3.0674e-05	0.483725	0.000959745	0.0491956				ENSMUSG00000129048
ENSMUSG00000030788	Rnf141	0.181885	0.0395153	0.330101	0.307735	0.00104215	0.0509668				ENSMUSG00000128745
ENSMUSG00000037475	Thoc2	0.275779	0.00957963	0.184019	0.438676	0.00141845	0.0618181				ENSMUSG00000128617
ENSMUSG00000033705	Stard9	0.392075	0.000457031	0.054104	0.485494	0.00149384	0.0645351				ENSMUSG00000128555
ENSMUSG00000047036	Zfp445	0.536961	0.000351682	0.0495627	0.520429	0.0014908	0.0645351				ENSMUSG00000128549
ENSMUSG00000031229	Atrx	0.263309	0.00284973	0.106309	0.591943	0.00151298	0.0645553				ENSMUSG00000128345
ENSMUSG00000074733	Zfp950	0.542842	0.00494466	0.136969	0.652535	0.00150133	0.0645553				ENSMUSG00000128166
ENSMUSG00000024921	Smarca2	0.259624	0.00122767	0.0772403	0.328617	0.00153304	0.0650916				ENSMUSG00000128101
ENSMUSG00000006740	Kif5b	0.320662	0.016313	0.232597	0.27883	0.00159675	0.0663727				ENSMUSG00000127364
ENSMUSG00000034647	Ankrd12	0.487551	0.00102625	0.0726173	0.670027	0.00162082	0.0668114				ENSMUSG00000127251
ENSMUSG00000049421	Zfp260	0.253091	0.0376119	0.322281	0.330184	0.00169052	0.0683739				ENSMUSG00000127021
ENSMUSG00000035545	Leng8	0.243194	0.00869062	0.171845	0.402766	0.00171132	0.0683739				ENSMUSG00000126938
ENSMUSG00000070733	Fryl	0.187649	0.00120908	0.0766064	0.320174	0.00174793	0.0691692				ENSMUSG00000126686
ENSMUSG00000031592	Pcm1	0.290216	0.02108	0.253754	0.34605	0.00174458	0.0691692				ENSMUSG00000126610
ENSMUSG00000058070	Eml1	0.253398	0.038192	0.325084	0.232409	0.00176775	0.0696748				ENSMUSG00000126238
ENSMUSG00000031010	Usp9x	0.204119	0.0363214	0.319125	0.273552	0.00192825	0.072461				ENSMUSG00000126148
ENSMUSG00000020680	Taf15	0.315658	0.00760034	0.159322	0.356967	0.0019722	0.0724664				ENSMUSG00000125816
ENSMUSG00000005417	Mprip	0.137193	0.0117755	0.204526	0.165589	0.00201329	0.0732259				ENSMUSG00000124773
ENSMUSG00000028530	Jak1	0.201317	0.0301679	0.296824	0.286409	0.00209957	0.0749858				ENSMUSG00000124599
ENSMUSG00000022961	Son	0.307857	0.00253366	0.104506	0.208584	0.0022597	0.0795561				ENSMUSG00000124311
ENSMUSG00000021027	Ralgapa1	0.236434	0.00626324	0.149474	0.303351	0.00230156	0.0804571				ENSMUSG00000124283
ENSMUSG00000006005	Tpr	0.36247	9.8874e-06	0.00808699	0.683066	0.00232152	0.0808371				ENSMUSG00000123948
ENSMUSG00000019907	Ppp1r12a	0.142824	0.00490642	0.136969	0.275886	0.00241037	0.0827978				ENSMUSG00000123407
ENSMUSG00000090659	Zfp493	0.490201	0.0389848	NA	0.627272	0.00243732	0.0834338				ENSMUSG00000123278
ENSMUSG00000019124	Scrn1	0.112698	0.0452583	0.344783	0.841252	0.00279702	0.0902471				ENSMUSG00000123149
ENSMUSG00000034525	Ice1	0.331891	0.000594024	0.0610438	0.256442	0.00284183	0.0909847				ENSMUSG00000122832
ENSMUSG00000025092	Hspa12a	0.214066	0.00757809	0.159322	0.550123	0.00294864	0.0933587				ENSMUSG00000122616
ENSMUSG00000025241	Fyco1	0.196965	0.0354397	0.316484	0.272303	0.00304997	0.0942916				ENSMUSG00000122484
ENSMUSG00000002748	Baz1b	0.34032	0.0006195	0.0610438	0.305918	0.00323337	0.0963487				ENSMUSG00000121914
ENSMUSG00000061755	Bod1l	0.257653	0.000524463	0.0582542	0.571336	0.00337885	0.0988965				ENSMUSG00000121913
ENSMUSG00000040549	Ckap5	0.267181	0.0295807	0.294726	0.296212	0.00342025	0.0995191				ENSMUSG00000121879
ENSMUSG00000024238	Zeb1	0.282347	0.000360416	0.0495627	0.317808	0.00359136	0.102686				ENSMUSG00000121868
ENSMUSG00000037270	Bltp1	0.316486	7.75056e-05	0.0248409	0.500741	0.00421236	0.113242				ENSMUSG00000121865
ENSMUSG00000038039	Gcc2	0.47973	8.131e-05	0.0248409	0.509554	0.0044313	0.117399				ENSMUSG00000121808
ENSMUSG00000012535	Tnpo3	0.206973	0.000879693	0.0685433	0.224584	0.00479175	0.121781				ENSMUSG00000121798
ENSMUSG00000056608	Chd9	0.455387	0.000984698	0.0708746	0.45425	0.0053551	0.129215				ENSMUSG00000121793
ENSMUSG00000049658	Bdp1	0.38896	5.44573e-05	0.0204147	0.357066	0.00553758	0.13218				ENSMUSG00000121789
ENSMUSG00000035569	Ankrd11	0.193423	0.000759418	0.0635165	0.16295	0.00666514	0.142628				ENSMUSG00000121788
ENSMUSG00000053754	Chd8	0.303677	0.000448049	0.054057	0.320206	0.00721708	0.147518				ENSMUSG00000121787
ENSMUSG00000054387	Mdm4	0.250503	0.00214691	0.0991677	0.233702	0.00877922	0.162723				ENSMUSG00000121785
ENSMUSG00000019971	Cep290	0.462735	0.000271254	0.0451939	0.850255	0.00970426	0.170826				ENSMUSG00000121784
ENSMUSG00000036202	Rif1	0.455787	0.00060873	0.0610438	0.375925	0.0106967	0.178754				ENSMUSG00000121783
ENSMUSG00000032525	Nktr	0.454582	0.000163388	0.0343274	0.285387	0.0110684	0.181291				ENSMUSG00000121780
ENSMUSG00000027346	Gpcpd1	0.203822	0.00059043	0.0610438	0.313158	0.0122955	0.190657				ENSMUSG00000121779
ENSMUSG00000007827	Ankrd26	0.532793	0.000966744	0.0703094	0.528027	0.0123819	0.19076				ENSMUSG00000121778
ENSMUSG00000030016	Zfp638	0.460514	0.000346404	0.0495627	0.441352	0.0132471	0.197074				ENSMUSG00000121777
ENSMUSG00000021488	Nsd1	0.368854	0.000450625	0.054057	0.189839	0.0160429	0.214476				ENSMUSG00000121727
ENSMUSG00000022035	Ccdc25	0.413275	0.00213338	0.0991677	0.360532	0.0164782	0.217164				ENSMUSG00000121724
ENSMUSG00000038170	Pde4dip	0.293558	0.000369181	0.0495627	0.0914075	0.0168925	0.219602				ENSMUSG00000121608
ENSMUSG00000096054	Syne1	0.228917	0.000270862	0.0451939	0.22572	0.0171633	0.22283				ENSMUSG00000121607
ENSMUSG00000021327	Zkscan3	0.452625	3.19804e-06	0.0035966	0.245014	0.0191781	0.235104				ENSMUSG00000121606
ENSMUSG00000057738	Sptan1	0.404537	0.00115891	0.0744768	0.373926	0.0195129	0.236281				ENSMUSG00000121596
ENSMUSG00000005871	Apc	0.310639	0.00148121	0.087101	0.280688	0.0195941	0.236426				ENSMUSG00000121584
[truncated: 12,780 more rows]

## Sheet: SC FUS.het.KO
Spinal cord Fus+/- vs Fus+/+	baseMean	log2FoldChange	lfcSE	stat	pvalue	padj	Gene_name_conversion	Gene type	mitochondrion (GO:0005739)
[truncated: 17,413 more rows]

[truncated: 3 more sheets: ORA (gProfiler), curated mitochondria, RNAseq metadata]
