# Supplementary material
Source: Research Square preprint supplement (doi:10.21203/rs.3.rs-9043045/v2)
Supplement: Supplementary file 2 [file 7939298d9b7bc51921b62f55.docx]

**Supplementary document 1: Acta Neuropathologica**

**Early mitochondrial gene dysregulation precedes motor neuron degeneration in genomically humanised *FUS* mutant mice**

Georgia Price1,2, Graciana de Azambuja11, Chloe Williams3,David Thompson1,2, Charlotte Tibbit1, Zeinab Ali1,4, Adele Austin1, Mhoriam Ahmed6, Andrew Tosolini6,7,8, Anny Devoy5,6, Gemma F Codner1, Lydia Teboul1, Linda Greensmith6, Giampietro Schiavo6,9, Sandrine da Cruz11, Elizabeth MC Fisher1,6,*, Thomas J Cunningham1,10,*

1. Mary Lyon Centre at MRC Harwell, Harwell, UK
2. Nuffield Department of Clinical Neurosciences, University of Oxford, Oxford, UK
3. Department of Medical and Translational Biology, Faculty of Medicine, Umeå University, Sweden
4. Department of Physiology, Anatomy and Genetics, University of Oxford, Oxford, UK
5. Dementia Research Institute, King's College London, London, UK
6. UCL Queen Square Motor Neuron Disease Centre, Department of Neuromuscular Diseases, UCL Queen Square Institute of Neurology, UCL, London, UK
7. Australian Institute for Bioengineering and Nanotechnology, University of Queensland, Brisbane, Australia
8. School of Biomedical Sciences, Faculty of Health, Medicine and Behavioural Sciences, The University of Queensland, St Lucia, Australia.
9. Dementia Research Institute, University College London, London, UK
10. Institute of Prion Diseases, MRC Prion Unit, UCL, London, UK
11. VIB-KU Leuven Center for Neuroscience (CNL), Department of Neurosciences, KU Leuven, Leuven Brain Institute, Belgium

* Joint senior authors

Corresponding author email: [tom.cunningham@ucl.ac.uk](mailto:t.cunningham@prion.ucl.ac.uk)

Pipeline:

Trimming (fastp) (WSL)

<https://doi.org/10.1093/bioinformatics/bty560>

Alignment (STAR) (WSL)

<https://doi.org/10.1093/bioinformatics/bts635>

featureCounts to provide gene level count data (WSL)

<https://doi.org/10.1093/bioinformatics/btt656>

*CQN to normalise FeatureCounts data* (WSL)

<https://doi.org/10.1093/bioinformatics/btt656>

<https://doi.org/10.1371/journal.pbio.3000481>

Deseq2 for differential expression (RStudio)

<https://doi.org/10.1186/s13059-014-0550-8>

Gprofiler for overrepresentation analysis

<https://biit.cs.ut.ee/gprofiler/gost>

*CQN requires gene length and GC% information at gene level. However this can vary depending on transcript usage. We used Salmon to quantify transcript level counts, then calculated average weighted gene length and GC content at gene level based on transcript usage.

<https://doi.org/10.1038/nmeth.4197>

TRIMMING (WSL)

micromamba create -n fastp

micromamba activate fastp

micromamba install fastp -c bioconda -c conda-forge

# Fus hetko vs wt data

fastp \

  -i /mnt/c/users/t.cunningham/downloads/bioinf/RNAseq/P525L/hetko/33_AGATAG_33_CCACAT_R1.fastq.gz \

  -o 33_trimmed.fastq.gz \

  --detect_adapter_for_pe \

  --cut_front \

  --cut_tail \

  --cut_window_size 4 \

  --cut_mean_quality 20 \

  --length_required 30 \

  --html 33fastp_report.html \

  --json 33fastp_report.json \

  --thread 4

fastp \

  -i /mnt/c/users/t.cunningham/downloads/bioinf/RNAseq/P525L/hetko/34_TTGGTA_34_GTTGAG_R1.fastq.gz \

  -o 34_trimmed.fastq.gz \

  --detect_adapter_for_pe \

  --cut_front \

  --cut_tail \

  --cut_window_size 4 \

  --cut_mean_quality 20 \

  --length_required 30 \

  --html 34fastp_report.html \

  --json 34fastp_report.json \

  --thread 4

fastp \

  -i /mnt/c/users/t.cunningham/downloads/bioinf/RNAseq/P525L/hetko/35_GTTACC_35_AGGAGA_R1.fastq.gz \

  -o 35_trimmed.fastq.gz \

  --detect_adapter_for_pe \

  --cut_front \

  --cut_tail \

  --cut_window_size 4 \

  --cut_mean_quality 20 \

  --length_required 30 \

  --html 35fastp_report.html \

  --json 35fastp_report.json \

  --thread 4

fastp \

  -i /mnt/c/users/t.cunningham/downloads/36_CGCAAC_36_CAGCCG_R1.fastq.gz \

  -o 36_trimmed.fastq.gz \

  --detect_adapter_for_pe \

  --cut_front \

  --cut_tail \

  --cut_window_size 4 \

  --cut_mean_quality 20 \

  --length_required 30 \

  --html 36fastp_report.html \

  --json 36fastp_report.json \

  --thread 4

fastp \

  -i /mnt/c/users/t.cunningham/downloads/bioinf/RNAseq/P525L/hetko/45_TAGGCT_45_GATACG_R1.fastq.gz \

  -o 45_trimmed.fastq.gz \

  --detect_adapter_for_pe \

  --cut_front \

  --cut_tail \

  --cut_window_size 4 \

  --cut_mean_quality 20 \

  --length_required 30 \

  --html 45fastp_report.html \

  --json 45fastp_report.json \

  --thread 4

fastp \

  -i /mnt/c/users/t.cunningham/downloads/bioinf/RNAseq/P525L/hetko/46_CTCCAT_46_GAGTTA_R1.fastq.gz \

  -o 46_trimmed.fastq.gz \

  --detect_adapter_for_pe \

  --cut_front \

  --cut_tail \

  --cut_window_size 4 \

  --cut_mean_quality 20 \

  --length_required 30 \

  --html 46fastp_report.html \

  --json 46fastp_report.json \

  --thread 4

fastp \

  -i /mnt/c/users/t.cunningham/downloads/bioinf/RNAseq/P525L/hetko/47_GCATGG_47_AGTTAG_R1.fastq.gz \

  -o 47_trimmed.fastq.gz \

  --detect_adapter_for_pe \

  --cut_front \

  --cut_tail \

  --cut_window_size 4 \

  --cut_mean_quality 20 \

  --length_required 30 \

  --html 47fastp_report.html \

  --json 47fastp_report.json \

  --thread 4

fastp \

  -i /mnt/c/users/t.cunningham/downloads/bioinf/RNAseq/P525L/hetko/48_AATAGC_48_TCGCGC_R1.fastq.gz \

  -o 48_trimmed.fastq.gz \

  --detect_adapter_for_pe \

  --cut_front \

  --cut_tail \

  --cut_window_size 4 \

  --cut_mean_quality 20 \

  --length_required 30 \

  --html 48fastp_report.html \

  --json 48fastp_report.json \

  --thread 4

#TRIMMING FOR TA P525L DATA

fastp \

  -i /mnt/c/users/t.cunningham/downloads/bioinf/RNAseq/P525L/TA/hFUS/56_ATATCC_56_TTTGGC_R1.fastq.gz \

  -o 56_trimmed.fastq.gz \

  --detect_adapter_for_pe \

  --cut_front \

  --cut_tail \

  --cut_window_size 4 \

  --cut_mean_quality 20 \

  --length_required 30 \

  --html 56fastp_report.html \

  --json 56fastp_report.json \

  --thread 4

fastp \

  -i /mnt/c/users/t.cunningham/downloads/bioinf/RNAseq/P525L/TA/hFUS/54_AATGAA_54_AGGCCT_R1.fastq.gz \

  -o 54_trimmed.fastq.gz \

  --detect_adapter_for_pe \

  --cut_front \

  --cut_tail \

  --cut_window_size 4 \

  --cut_mean_quality 20 \

  --length_required 30 \

  --html 54fastp_report.html \

  --json 54fastp_report.json \

  --thread 4

fastp \

  -i /mnt/c/users/t.cunningham/downloads/bioinf/RNAseq/P525L/TA/hFUS/52_GGTATA_52_CACACT_R1.fastq.gz \

  -o 52_trimmed.fastq.gz \

  --detect_adapter_for_pe \

  --cut_front \

  --cut_tail \

  --cut_window_size 4 \

  --cut_mean_quality 20 \

  --length_required 30 \

  --html 52fastp_report.html \

  --json 52fastp_report.json \

  --thread 4

fastp \

  -i /mnt/c/users/t.cunningham/downloads/bioinf/RNAseq/P525L/TA/hFUS/50_TCGAGG_50_GTTTTC_R1.fastq.gz \

  -o 50_trimmed.fastq.gz \

  --detect_adapter_for_pe \

  --cut_front \

  --cut_tail \

  --cut_window_size 4 \

  --cut_mean_quality 20 \

  --length_required 30 \

  --html 50fastp_report.html \

  --json 50fastp_report.json \

  --thread 4

fastp \

  -i /mnt/c/users/t.cunningham/downloads/bioinf/RNAseq/P525L/TA/P525L/64_CAGGAC_64_CGCATC_R1.fastq.gz \

  -o 64_trimmed.fastq.gz \

  --detect_adapter_for_pe \

  --cut_front \

  --cut_tail \

  --cut_window_size 4 \

  --cut_mean_quality 20 \

  --length_required 30 \

  --html 64fastp_report.html \

  --json 64fastp_report.json \

  --thread 4

fastp \

  -i /mnt/c/users/t.cunningham/downloads/bioinf/RNAseq/P525L/TA/P525L/62_CAATGC_62_AAATCG_R1.fastq.gz \

  -o 62_trimmed.fastq.gz \

  --detect_adapter_for_pe \

  --cut_front \

  --cut_tail \

  --cut_window_size 4 \

  --cut_mean_quality 20 \

  --length_required 30 \

  --html 62fastp_report.html \

  --json 62fastp_report.json \

  --thread 4

fastp \

  -i /mnt/c/users/t.cunningham/downloads/bioinf/RNAseq/P525L/TA/P525L/60_TTCCGC_60_AATTGA_R1.fastq.gz \

  -o 60_trimmed.fastq.gz \

  --detect_adapter_for_pe \

  --cut_front \

  --cut_tail \

  --cut_window_size 4 \

  --cut_mean_quality 20 \

  --length_required 30 \

  --html 60fastp_report.html \

  --json 60fastp_report.json \

  --thread 4

fastp \

  -i /mnt/c/users/t.cunningham/downloads/bioinf/RNAseq/P525L/TA/P525L/58_ATAAGA_58_CACCGA_R1.fastq.gz \

  -o 58_trimmed.fastq.gz \

  --detect_adapter_for_pe \

  --cut_front \

  --cut_tail \

  --cut_window_size 4 \

  --cut_mean_quality 20 \

  --length_required 30 \

  --html 58fastp_report.html \

  --json 58fastp_report.json \

  --thread 4

#TRIMMING for cord P525L DATA

micromamba activate fastp

fastp \

  -i /mnt/c/users/t.cunningham/downloads/bioinf/RNAseq/P525L/cord/hFUS/49_GTGCCA_49_GGCTGA_R1.fastq.gz \

  -o 49_trimmed.fastq.gz \

  --detect_adapter_for_pe \

  --cut_front \

  --cut_tail \

  --cut_window_size 4 \

  --cut_mean_quality 20 \

  --length_required 30 \

  --html 49fastp_report.html \

  --json 49fastp_report.json \

  --thread 4

fastp \

  -i /mnt/c/users/t.cunningham/downloads/bioinf/RNAseq/P525L/cord/hFUS/51_CACTAA_51_ACGGTA_R1.fastq.gz \

  -o 51_trimmed.fastq.gz \

  --detect_adapter_for_pe \

  --cut_front \

  --cut_tail \

  --cut_window_size 4 \

  --cut_mean_quality 20 \

  --length_required 30 \

  --html 51fastp_report.html \

  --json 51fastp_report.json \

  --thread 4

fastp \

  -i /mnt/c/users/t.cunningham/downloads/bioinf/RNAseq/P525L/cord/hFUS/53_CGCCTG_53_GGAAAG_R1.fastq.gz \

  -o 53_trimmed.fastq.gz \

  --detect_adapter_for_pe \

  --cut_front \

  --cut_tail \

  --cut_window_size 4 \

  --cut_mean_quality 20 \

  --length_required 30 \

  --html 53fastp_report.html \

  --json 53fastp_report.json \

  --thread 4

fastp \

  -i /mnt/c/users/t.cunningham/downloads/bioinf/RNAseq/P525L/cord/hFUS/55_ACAACG_55_CGCCAG_R1.fastq.gz \

  -o 55_trimmed.fastq.gz \

  --detect_adapter_for_pe \

  --cut_front \

  --cut_tail \

  --cut_window_size 4 \

  --cut_mean_quality 20 \

  --length_required 30 \

  --html 55fastp_report.html \

  --json 55fastp_report.json \

  --thread 4

fastp \

  -i /mnt/c/users/t.cunningham/downloads/bioinf/RNAseq/P525L/cord/P525L/57_AGTACT_57_TCTGAT_R1.fastq.gz \

  -o 57_trimmed.fastq.gz \

  --detect_adapter_for_pe \

  --cut_front \

  --cut_tail \

  --cut_window_size 4 \

  --cut_mean_quality 20 \

  --length_required 30 \

  --html 57fastp_report.html \

  --json 57fastp_report.json \

  --thread 4

fastp \

  -i /mnt/c/users/t.cunningham/downloads/bioinf/RNAseq/P525L/cord/P525L/59_GGTGAG_59_GCAGCG_R1.fastq.gz \

  -o 59_trimmed.fastq.gz \

  --detect_adapter_for_pe \

  --cut_front \

  --cut_tail \

  --cut_window_size 4 \

  --cut_mean_quality 20 \

  --length_required 30 \

  --html 59fastp_report.html \

  --json 59fastp_report.json \

  --thread 4

fastp \

  -i /mnt/c/users/t.cunningham/downloads/bioinf/RNAseq/P525L/cord/P525L/61_GAAGTG_61_TGGTTC_R1.fastq.gz \

  -o 61_trimmed.fastq.gz \

  --detect_adapter_for_pe \

  --cut_front \

  --cut_tail \

  --cut_window_size 4 \

  --cut_mean_quality 20 \

  --length_required 30 \

  --html 61fastp_report.html \

  --json 61fastp_report.json \

  --thread 4

fastp \

  -i /mnt/c/users/t.cunningham/downloads/bioinf/RNAseq/P525L/cord/P525L/63_ACGTCT_63_GTGCGA_R1.fastq.gz \

  -o 63_trimmed.fastq.gz \

  --detect_adapter_for_pe \

  --cut_front \

  --cut_tail \

  --cut_window_size 4 \

  --cut_mean_quality 20 \

  --length_required 30 \

  --html 63fastp_report.html \

  --json 63fastp_report.json \

  --thread 4

STAR and featurecounts (WSL)

#build genome index

#.fa and .gtf files from Ensembl

STAR --runThreadN 8 \

--runMode genomeGenerate \

--genomeDir /mnt/c/users/t.cunningham/downloads/bioinf/RNAseq/strainindexmouse \

--genomeFastaFiles /mnt/c/users/t.cunningham/downloads/bioinf/RNAseq/Mus_musculus.GRCm39.dna.primary_assembly.fa \

--sjdbGTFfile /mnt/c/users/t.cunningham/downloads/bioinf/RNAseq/Mus_musculus.GRCm39.114.gtf \

--sjdbOverhang 74

#STAR on TRIMMED hetko samples

micromamba activate rnaseq_env

#33,34,35,36 wt

#45,46,47,48 hetko

STAR --runThreadN 8 \

--genomeDir /mnt/c/users/t.cunningham/downloads/bioinf/RNAseq/strainindexmouse \

--readFilesIn 33_trimmed.fastq.gz \

--readFilesCommand zcat \

--outSAMtype BAM SortedByCoordinate \

--outFileNamePrefix 33_

STAR --runThreadN 8 \

--genomeDir /mnt/c/users/t.cunningham/downloads/bioinf/RNAseq/strainindexmouse \

--readFilesIn 34_trimmed.fastq.gz \

--readFilesCommand zcat \

--outSAMtype BAM SortedByCoordinate \

--outFileNamePrefix 34_

STAR --runThreadN 8 \

--genomeDir /mnt/c/users/t.cunningham/downloads/bioinf/RNAseq/strainindexmouse \

--readFilesIn 35_trimmed.fastq.gz \

--readFilesCommand zcat \

--outSAMtype BAM SortedByCoordinate \

--outFileNamePrefix 35_

STAR --runThreadN 8 \

--genomeDir /mnt/c/users/t.cunningham/downloads/bioinf/RNAseq/strainindexmouse \

--readFilesIn 36_trimmed.fastq.gz \

--readFilesCommand zcat \

--outSAMtype BAM SortedByCoordinate \

--outFileNamePrefix 36_

STAR --runThreadN 8 \

--genomeDir /mnt/c/users/t.cunningham/downloads/bioinf/RNAseq/strainindexmouse \

--readFilesIn 45_trimmed.fastq.gz \

--readFilesCommand zcat \

--outSAMtype BAM SortedByCoordinate \

--outFileNamePrefix 45_

STAR --runThreadN 8 \

--genomeDir /mnt/c/users/t.cunningham/downloads/bioinf/RNAseq/strainindexmouse \

--readFilesIn 46_trimmed.fastq.gz \

--readFilesCommand zcat \

--outSAMtype BAM SortedByCoordinate \

--outFileNamePrefix 46_

STAR --runThreadN 8 \

--genomeDir /mnt/c/users/t.cunningham/downloads/bioinf/RNAseq/strainindexmouse \

--readFilesIn 47_trimmed.fastq.gz \

--readFilesCommand zcat \

--outSAMtype BAM SortedByCoordinate \

--outFileNamePrefix 47_

STAR --runThreadN 8 \

--genomeDir /mnt/c/users/t.cunningham/downloads/bioinf/RNAseq/strainindexmouse \

--readFilesIn 48_trimmed.fastq.gz \

--readFilesCommand zcat \

--outSAMtype BAM SortedByCoordinate \

--outFileNamePrefix 48_

#FeatureCounts

featureCounts -a /mnt/c/users/t.cunningham/downloads/bioinf/RNAseq/Mus_musculus.GRCm39.114.gtf -T 4 -o hetkocounts1.txt -s 1 -t exon -g gene_id 45_Aligned.sortedByCoord.out.bam 46_Aligned.sortedByCoord.out.bam 47_Aligned.sortedByCoord.out.bam 48_Aligned.sortedByCoord.out.bam 33_Aligned.sortedByCoord.out.bam 34_Aligned.sortedByCoord.out.bam 35_Aligned.sortedByCoord.out.bam 36_Aligned.sortedByCoord.out.bam

#move txt file to R folder rnaseq

#STAR on TRIMMED TA samples

#50, 52, 54, 56 hFUS

#58, 60, 62, 64 P525L

micromamba activate rnaseq_env

STAR --runThreadN 8 \

--genomeDir /mnt/c/users/t.cunningham/downloads/bioinf/RNAseq/strainindexmouse \

--readFilesIn 50_trimmed.fastq.gz \

--readFilesCommand zcat \

--outSAMtype BAM SortedByCoordinate \

--outFileNamePrefix 50_

STAR --runThreadN 8 \

--genomeDir /mnt/c/users/t.cunningham/downloads/bioinf/RNAseq/strainindexmouse \

--readFilesIn 52_trimmed.fastq.gz \

--readFilesCommand zcat \

--outSAMtype BAM SortedByCoordinate \

--outFileNamePrefix 52_

STAR --runThreadN 8 \

--genomeDir /mnt/c/users/t.cunningham/downloads/bioinf/RNAseq/strainindexmouse \

--readFilesIn 54_trimmed.fastq.gz \

--readFilesCommand zcat \

--outSAMtype BAM SortedByCoordinate \

--outFileNamePrefix 54_

STAR --runThreadN 8 \

--genomeDir /mnt/c/users/t.cunningham/downloads/bioinf/RNAseq/strainindexmouse \

--readFilesIn 56_trimmed.fastq.gz \

--readFilesCommand zcat \

--outSAMtype BAM SortedByCoordinate \

--outFileNamePrefix 56_

STAR --runThreadN 8 \

--genomeDir /mnt/c/users/t.cunningham/downloads/bioinf/RNAseq/strainindexmouse \

--readFilesIn 58_trimmed.fastq.gz \

--readFilesCommand zcat \

--outSAMtype BAM SortedByCoordinate \

--outFileNamePrefix 58_

STAR --runThreadN 8 \

--genomeDir /mnt/c/users/t.cunningham/downloads/bioinf/RNAseq/strainindexmouse \

--readFilesIn 60_trimmed.fastq.gz \

--readFilesCommand zcat \

--outSAMtype BAM SortedByCoordinate \

--outFileNamePrefix 60_

STAR --runThreadN 8 \

--genomeDir /mnt/c/users/t.cunningham/downloads/bioinf/RNAseq/strainindexmouse \

--readFilesIn 62_trimmed.fastq.gz \

--readFilesCommand zcat \

--outSAMtype BAM SortedByCoordinate \

--outFileNamePrefix 62_

STAR --runThreadN 8 \

--genomeDir /mnt/c/users/t.cunningham/downloads/bioinf/RNAseq/strainindexmouse \

--readFilesIn 64_trimmed.fastq.gz \

--readFilesCommand zcat \

--outSAMtype BAM SortedByCoordinate \

--outFileNamePrefix 64_

#FeatureCounts

#50, 52, 54, 56 hFUS

#58, 60, 62, 64 P525L

featureCounts -a /mnt/c/users/t.cunningham/downloads/bioinf/RNAseq/Mus_musculus.GRCm39.114.gtf -T 4 -o P525LTAcounts1.txt -s 1 -t exon -g gene_id 64_Aligned.sortedByCoord.out.bam 62_Aligned.sortedByCoord.out.bam 60_Aligned.sortedByCoord.out.bam 58_Aligned.sortedByCoord.out.bam 56_Aligned.sortedByCoord.out.bam 54_Aligned.sortedByCoord.out.bam 52_Aligned.sortedByCoord.out.bam 50_Aligned.sortedByCoord.out.bam

#move txt file to R folder rnaseq

#STAR on TRIMMED cord samples

#49,51,53,55 hFUS

#57,59,61,63 P525L

micromamba activate rnaseq_env

STAR --runThreadN 8 \

--genomeDir /mnt/c/users/t.cunningham/downloads/bioinf/RNAseq/strainindexmouse \

--readFilesIn 49_trimmed.fastq.gz \

--readFilesCommand zcat \

--outSAMtype BAM SortedByCoordinate \

--outFileNamePrefix 49_

STAR --runThreadN 8 \

--genomeDir /mnt/c/users/t.cunningham/downloads/bioinf/RNAseq/strainindexmouse \

--readFilesIn 51_trimmed.fastq.gz \

--readFilesCommand zcat \

--outSAMtype BAM SortedByCoordinate \

--outFileNamePrefix 51_

STAR --runThreadN 8 \

--genomeDir /mnt/c/users/t.cunningham/downloads/bioinf/RNAseq/strainindexmouse \

--readFilesIn 53_trimmed.fastq.gz \

--readFilesCommand zcat \

--outSAMtype BAM SortedByCoordinate \

--outFileNamePrefix 53_

STAR --runThreadN 8 \

--genomeDir /mnt/c/users/t.cunningham/downloads/bioinf/RNAseq/strainindexmouse \

--readFilesIn 55_trimmed.fastq.gz \

--readFilesCommand zcat \

--outSAMtype BAM SortedByCoordinate \

--outFileNamePrefix 55_

STAR --runThreadN 8 \

--genomeDir /mnt/c/users/t.cunningham/downloads/bioinf/RNAseq/strainindexmouse \

--readFilesIn 57_trimmed.fastq.gz \

--readFilesCommand zcat \

--outSAMtype BAM SortedByCoordinate \

--outFileNamePrefix 57_

STAR --runThreadN 8 \

--genomeDir /mnt/c/users/t.cunningham/downloads/bioinf/RNAseq/strainindexmouse \

--readFilesIn 59_trimmed.fastq.gz \

--readFilesCommand zcat \

--outSAMtype BAM SortedByCoordinate \

--outFileNamePrefix 59_

STAR --runThreadN 8 \

--genomeDir /mnt/c/users/t.cunningham/downloads/bioinf/RNAseq/strainindexmouse \

--readFilesIn 61_trimmed.fastq.gz \

--readFilesCommand zcat \

--outSAMtype BAM SortedByCoordinate \

--outFileNamePrefix 61_

STAR --runThreadN 8 \

--genomeDir /mnt/c/users/t.cunningham/downloads/bioinf/RNAseq/strainindexmouse \

--readFilesIn 63_trimmed.fastq.gz \

--readFilesCommand zcat \

--outSAMtype BAM SortedByCoordinate \

--outFileNamePrefix 63_

#FeatureCounts

#49,51,53,55 hFUS

#57,59,61,63 P525L

featureCounts -a /mnt/c/users/t.cunningham/downloads/bioinf/RNAseq/Mus_musculus.GRCm39.114.gtf -T 4 -o P525Lcordcounts1.txt -s 1 -t exon -g gene_id 49_Aligned.sortedByCoord.out.bam 51_Aligned.sortedByCoord.out.bam 53_Aligned.sortedByCoord.out.bam 55_Aligned.sortedByCoord.out.bam 57_Aligned.sortedByCoord.out.bam 59_Aligned.sortedByCoord.out.bam 61_Aligned.sortedByCoord.out.bam 63_Aligned.sortedByCoord.out.bam

#move txt file to R folder rnaseq

Salmon to obtain weighted gene length and GC content (according to actual transcript usage), for CQN normalisation (WSL and RStudio)

micromamba activate salmon

#Create decoy

listgrep "^>" /mnt/c/users/t.cunningham/downloads/bioinf/RNAseq/Mus_musculus.GRCm39.dna.primary_assembly.fa | cut -d " " -f 1 | sed 's/>//' > decoys.txt

# Concatenate transcriptome and genome, include ncRNA.fa transcriptome file, files from Ensembl

cat /mnt/c/users/t.cunningham/downloads/bioinf/RNAseq/Mus_musculus.GRCm39.cdna.all.fa /mnt/c/users/t.cunningham/downloads/bioinf/RNAseq/Mus_musculus.GRCm39.ncrna.fa /mnt/c/users/t.cunningham/downloads/bioinf/RNAseq/Mus_musculus.GRCm39.dna.primary_assembly.fa > gentrome2.fa

salmon index -t /mnt/c/users/t.cunningham/downloads/bioinf/RNAseq/gentrome2.fa -d /mnt/c/users/t.cunningham/downloads/bioinf/RNAseq/decoys.txt -p 4 -i salmon_index2_m39

#salmon quant cord P525L

salmon quant \

  -i salmon_index2_m39 \

  -l SF \

  -r 49_trimmed.fastq.gz \

  --validateMappings \

  --fldMean 329 \

  --fldSD 36 \

  -o /mnt/c/users/t.cunningham/downloads/bioinf/RNAseq49

salmon quant \

  -i salmon_index2_m39 \

  -l SF \

  -r 51_trimmed.fastq.gz \

  --validateMappings \

  --fldMean 329 \

  --fldSD 36 \

  -o /mnt/c/users/t.cunningham/downloads/bioinf/RNAseq51

salmon quant \

  -i salmon_index2_m39 \

  -l SF \

  -r 53_trimmed.fastq.gz \

  --validateMappings \

  --fldMean 329 \

  --fldSD 36 \

  -o /mnt/c/users/t.cunningham/downloads/bioinf/RNAseq53

salmon quant \

  -i salmon_index2_m39 \

  -l SF \

  -r 55_trimmed.fastq.gz \

  --validateMappings \

  --fldMean 329 \

  --fldSD 36 \

  -o /mnt/c/users/t.cunningham/downloads/bioinf/RNAseq55

salmon quant \

  -i salmon_index2_m39 \

  -l SF \

  -r 57_trimmed.fastq.gz \

  --validateMappings \

  --fldMean 329 \

  --fldSD 36 \

  -o /mnt/c/users/t.cunningham/downloads/bioinf/RNAseq57

salmon quant \

  -i salmon_index2_m39 \

  -l SF \

  -r 59_trimmed.fastq.gz \

  --validateMappings \

  --fldMean 329 \

  --fldSD 36 \

  -o /mnt/c/users/t.cunningham/downloads/bioinf/RNAseq59

salmon quant \

  -i salmon_index2_m39 \

  -l SF \

  -r 61_trimmed.fastq.gz \

  --validateMappings \

  --fldMean 329 \

  --fldSD 36 \

  -o /mnt/c/users/t.cunningham/downloads/bioinf/RNAseq61

salmon quant \

  -i salmon_index2_m39 \

  -l SF \

  -r 63_trimmed.fastq.gz \

  --validateMappings \

  --fldMean 329 \

  --fldSD 36 \

  -o /mnt/c/users/t.cunningham/downloads/bioinf/RNAseq63

#salmon quant TA

50, 52, 54, 56 hFUS

58, 60, 62, 64 P525L

micromamba activate salmon

salmon quant \

  -i salmon_index2_m39 \

  -l SF \

  -r 50_trimmed.fastq.gz \

  --validateMappings \

  --fldMean 329 \

  --fldSD 36 \

  -o /mnt/c/users/t.cunningham/downloads/bioinf/RNAseq50

salmon quant \

  -i salmon_index2_m39 \

  -l SF \

  -r 52_trimmed.fastq.gz \

  --validateMappings \

  --fldMean 329 \

  --fldSD 36 \

  -o /mnt/c/users/t.cunningham/downloads/bioinf/RNAseq52

salmon quant \

  -i salmon_index2_m39 \

  -l SF \

  -r 54_trimmed.fastq.gz \

  --validateMappings \

  --fldMean 329 \

  --fldSD 36 \

  -o /mnt/c/users/t.cunningham/downloads/bioinf/RNAseq54

salmon quant \

  -i salmon_index2_m39 \

  -l SF \

  -r 56_trimmed.fastq.gz \

  --validateMappings \

  --fldMean 329 \

  --fldSD 36 \

  -o /mnt/c/users/t.cunningham/downloads/bioinf/RNAseq56

salmon quant \

  -i salmon_index2_m39 \

  -l SF \

  -r 58_trimmed.fastq.gz \

  --validateMappings \

  --fldMean 329 \

  --fldSD 36 \

  -o /mnt/c/users/t.cunningham/downloads/bioinf/RNAseq58

salmon quant \

  -i salmon_index2_m39 \

  -l SF \

  -r 60_trimmed.fastq.gz \

  --validateMappings \

  --fldMean 329 \

  --fldSD 36 \

  -o /mnt/c/users/t.cunningham/downloads/bioinf/RNAseq60

salmon quant \

  -i salmon_index2_m39 \

  -l SF \

  -r 62_trimmed.fastq.gz \

  --validateMappings \

  --fldMean 329 \

  --fldSD 36 \

  -o /mnt/c/users/t.cunningham/downloads/bioinf/RNAseq62

salmon quant \

  -i salmon_index2_m39 \

  -l SF \

  -r 64_trimmed.fastq.gz \

  --validateMappings \

  --fldMean 329 \

  --fldSD 36 \

  -o /mnt/c/users/t.cunningham/downloads/bioinf/RNAseq64

#salmon quant hetko cord

33,34,35,36 wt

45,46,47,48 hetko

micromamba activate salmon

salmon quant \

  -i salmon_index2_m39 \

  -l SF \

  -r 33_trimmed.fastq.gz \

  --validateMappings \

  --fldMean 329 \

  --fldSD 36 \

  -o /mnt/c/users/t.cunningham/downloads/bioinf/RNAseq33

salmon quant \

  -i salmon_index2_m39 \

  -l SF \

  -r 34_trimmed.fastq.gz \

  --validateMappings \

  --fldMean 329 \

  --fldSD 36 \

  -o /mnt/c/users/t.cunningham/downloads/bioinf/RNAseq34

salmon quant \

  -i salmon_index2_m39 \

  -l SF \

  -r 35_trimmed.fastq.gz \

  --validateMappings \

  --fldMean 329 \

  --fldSD 36 \

  -o /mnt/c/users/t.cunningham/downloads/bioinf/RNAseq35

salmon quant \

  -i salmon_index2_m39 \

  -l SF \

  -r 36_trimmed.fastq.gz \

  --validateMappings \

  --fldMean 329 \

  --fldSD 36 \

  -o /mnt/c/users/t.cunningham/downloads/bioinf/RNAseq36

salmon quant \

  -i salmon_index2_m39 \

  -l SF \

  -r 45_trimmed.fastq.gz \

  --validateMappings \

  --fldMean 329 \

  --fldSD 36 \

  -o /mnt/c/users/t.cunningham/downloads/bioinf/RNAseq45

salmon quant \

  -i salmon_index2_m39 \

  -l SF \

  -r 46_trimmed.fastq.gz \

  --validateMappings \

  --fldMean 329 \

  --fldSD 36 \

  -o /mnt/c/users/t.cunningham/downloads/bioinf/RNAseq46

salmon quant \

  -i salmon_index2_m39 \

  -l SF \

  -r 47_trimmed.fastq.gz \

  --validateMappings \

  --fldMean 329 \

  --fldSD 36 \

  -o /mnt/c/users/t.cunningham/downloads/bioinf/RNAseq47

salmon quant \

  -i salmon_index2_m39 \

  -l SF \

  -r 48_trimmed.fastq.gz \

  --validateMappings \

  --fldMean 329 \

  --fldSD 36 \

  -o /mnt/c/users/t.cunningham/downloads/bioinf/RNAseq48

#move files to R folder

Rstudio for Weighted length and GC data extraction

# P525L **TA Weighted length and GC data extraction (for CQN):**

library(tximport)

library(readr)

library(dplyr)

library(tidyr)

TAmeta <- read.table("TAmetadata.txt", header = TRUE)

files <- file.path("salmon_output_all_TA", TAmeta$sample_id, "quant.sf")

names(files) <- TAmeta$sample_id

txi_transcript <- tximport(files,

type = "salmon",

txOut = TRUE,

countsFromAbundance = "lengthScaledTPM",

ignoreTxVersion = TRUE)

rownames(txi_transcript$abundance) <- sub("\\..*", "", rownames(txi_transcript$abundance))

# Load transcript-level TPMs from tximport

tpm_matrix <- txi_transcript$abundance

# Load transcript annotation derived from biomart

tx_annot <- read.csv("tx_length_gc.csv")

# Clean transcript IDs if needed

tx_annot$TXNAME <- sub("\\..*", "", tx_annot$TXNAME)

# TPM matrix from tximport

tpm_matrix <- txi_transcript$abundance

rownames(tpm_matrix) <- sub("\\..*", "", rownames(tpm_matrix)) # match TXNAME

# Reshape TPMs to long format

tpm_df <- as.data.frame(tpm_matrix) %>%

rownames_to_column("TXNAME") %>%

pivot_longer(cols = -TXNAME, names_to = "sample_id", values_to = "TPM")

# Merge with metadata and annotation

merged <- tpm_df %>%

left_join(TAmeta, by = "sample_id") %>%

left_join(tx_annot, by = "TXNAME")

gene_len_by_condition <- merged %>%

group_by(condition, Gene_ID) %>%

summarise(weighted_length = sum(length * TPM) / sum(TPM), .groups = "drop")

write.csv(gene_len_by_condition, "weighted_gene_lengths_by_condition_TA.csv", row.names = FALSE)

#and for GC

# Merge sample condition and transcript annotation

merged_gc <- tpm_df %>%

left_join(TAmeta, by = "sample_id") %>%

left_join(tx_annot[, c("TXNAME", "GC", "Gene_ID")], by = "TXNAME")

gene_gc_condition <- merged_gc %>%

group_by(condition, Gene_ID) %>%

summarise(total_tpm = sum(TPM),

weighted_GC = ifelse(total_tpm > 0, sum(GC * TPM) / total_tpm, NA_real_),

.groups = "drop")

write.csv(gene_gc_condition, "weighted_gc_by_condition_TA.csv", row.names = FALSE)

#manually average length and GC% across the 2 conditions

#manually add this data to TAcountsF.txt file generated below

#manually fill NA values in both .csv files using longest transcript length and longest transcript GC%, from biomart

#save file as gene_info_TA1.csv

#for use in CQN

# **P525L cord Weighted length and GC data extraction (for CQN):**

library(tximport)

library(readr)

library(dplyr)

library(tidyr)

cordmeta <- read.table("cordmetadata.txt", header = TRUE)

files <- file.path("salmon_output_all_cord", cordmeta$sample_id, "quant.sf")

names(files) <- cordmeta$sample_id

txi_transcript <- tximport(files,

type = "salmon",

txOut = TRUE,

countsFromAbundance = "lengthScaledTPM",

ignoreTxVersion = TRUE)

rownames(txi_transcript$abundance) <- sub("\\..*", "", rownames(txi_transcript$abundance))

# Load transcript-level TPMs from tximport

tpm_matrix <- txi_transcript$abundance

# Load transcript annotation

tx_annot <- read.csv("tx_length_gc.csv")

# Clean transcript IDs if needed

tx_annot$TXNAME <- sub("\\..*", "", tx_annot$TXNAME)

# TPM matrix from tximport

tpm_matrix <- txi_transcript$abundance

rownames(tpm_matrix) <- sub("\\..*", "", rownames(tpm_matrix)) # match TXNAME

# Reshape TPMs to long format

tpm_df <- as.data.frame(tpm_matrix) %>%

rownames_to_column("TXNAME") %>%

pivot_longer(cols = -TXNAME, names_to = "sample_id", values_to = "TPM")

# Merge with metadata and annotation

merged <- tpm_df %>%

left_join(cordmeta, by = "sample_id") %>%

left_join(tx_annot, by = "TXNAME")

gene_len_by_condition <- merged %>%

group_by(condition, Gene_ID) %>%

summarise(weighted_length = sum(length * TPM) / sum(TPM), .groups = "drop")

library(ggplot2)

ggplot(gene_len_by_condition, aes(x = condition, y = weighted_length)) +

geom_violin() +

labs(title = "Weighted Gene Length by Condition", y = "Weighted Length (bp)") +

theme_minimal()

write.csv(gene_len_by_condition, "weighted_gene_lengths_by_condition_cord.csv", row.names = FALSE)

#and for GC

# Merge sample condition and transcript annotation

merged_gc <- tpm_df %>%

left_join(cordmeta, by = "sample_id") %>%

left_join(tx_annot[, c("TXNAME", "GC", "Gene_ID")], by = "TXNAME")

gene_gc_condition <- merged_gc %>%

group_by(condition, Gene_ID) %>%

summarise(total_tpm = sum(TPM),

weighted_GC = ifelse(total_tpm > 0, sum(GC * TPM) / total_tpm, NA_real_),

.groups = "drop")

write.csv(gene_gc_condition, "weighted_gc_by_condition_cord.csv", row.names = FALSE)

#manually average length and GC% across the 2 conditions

#manually add this data to TAcountsF.txt file generated below

#manually fill NA values in both .csv files using longest transcript length and longest transcript GC%, from biomart

#save file as gene_info_cord1.csv

#for use in CQN

# **hetko cord Weighted length and GC data extraction (for CQN):**

library(tximport)

library(readr)

library(dplyr)

library(tidyr)

hkmeta <- read.table("hkmetadata.txt", header = TRUE)

files <- file.path("salmon_output_all_hk", hkmeta$sample_id, "quant.sf")

names(files) <- hkmeta$sample_id

txi_transcript <- tximport(files,

type = "salmon",

txOut = TRUE,

countsFromAbundance = "lengthScaledTPM",

ignoreTxVersion = TRUE)

rownames(txi_transcript$abundance) <- sub("\\..*", "", rownames(txi_transcript$abundance))

# Load transcript-level TPMs from tximport

tpm_matrix <- txi_transcript$abundance

# Load transcript annotation

tx_annot <- read.csv("tx_length_gc.csv")

# Clean transcript IDs if needed

tx_annot$TXNAME <- sub("\\..*", "", tx_annot$TXNAME)

# TPM matrix from tximport

tpm_matrix <- txi_transcript$abundance

rownames(tpm_matrix) <- sub("\\..*", "", rownames(tpm_matrix)) # match TXNAME

# Reshape TPMs to long format

tpm_df <- as.data.frame(tpm_matrix) %>%

rownames_to_column("TXNAME") %>%

pivot_longer(cols = -TXNAME, names_to = "sample_id", values_to = "TPM")

# Merge with metadata and annotation

merged <- tpm_df %>%

left_join(hkmeta, by = "sample_id") %>%

left_join(tx_annot, by = "TXNAME")

gene_len_by_condition <- merged %>%

group_by(condition, Gene_ID) %>%

summarise(weighted_length = sum(length * TPM) / sum(TPM), .groups = "drop")

library(ggplot2)

ggplot(gene_len_by_condition, aes(x = condition, y = weighted_length)) +

geom_violin() +

labs(title = "Weighted Gene Length by Condition", y = "Weighted Length (bp)") +

theme_minimal()

write.csv(gene_len_by_condition, "weighted_gene_lengths_by_condition_hk.csv", row.names = FALSE)

#and for GC

# Merge sample condition and transcript annotation

merged_gc <- tpm_df %>%

left_join(hkmeta, by = "sample_id") %>%

left_join(tx_annot[, c("TXNAME", "GC", "Gene_ID")], by = "TXNAME")

gene_gc_condition <- merged_gc %>%

group_by(condition, Gene_ID) %>%

summarise(total_tpm = sum(TPM),

weighted_GC = ifelse(total_tpm > 0, sum(GC * TPM) / total_tpm, NA_real_),

.groups = "drop")

write.csv(gene_gc_condition, "weighted_gc_by_condition.csv", row.names = FALSE)

#manually average length and GC% across the 2 conditions

#manually add this data to TAcountsF.txt file generated below

#manually fill NA values in both .csv files using longest transcript length and longest transcript GC%, from biomart

#save file as gene_info_hetko1.csv

#for use in CQN

CQN normalisation AND Deseq2 (RStudio)

#using input from CQN and gene length and GC content data derived from Salmon

#P525L cord

# ▒▒▒ SETUP ▒▒▒ -----------------------------------------------------------

set.seed(2024)

library(DESeq2)

library(cqn)

# Load and filter raw counts from featureCounts

cord_raw <- read.table("P525Lcordcounts1.txt", header = TRUE, row.names = 1, comment.char = "#")

cord_counts <- cord_raw[, 6:ncol(cord_raw)]

keep <- rowSums(cord_counts >= 10) >= 4

cordcountsF <- cord_counts[keep, ]

saveRDS(cordcountsF, "cordcountsF.rds")

# ▒▒▒ LOAD ANNOTATION ▒▒▒ data derived from Salmon output

cordgene_info <- read.csv("gene_info_cord1.csv")

rownames(cordgene_info) <- cordgene_info$gene_id

cordgene_infoF <- cordgene_info[rownames(cordcountsF), ]

cordgc <- cordgene_infoF$Wgc

cordlengths <- cordgene_infoF$Wlength

saveRDS(cordgene_infoF, "cordgene_infoF.rds")

# ▒▒▒ CQN NORMALIZATION ▒▒▒ ----------------------------------------------

cordcqn_obj <- cqn(counts = cordcountsF, x = cordgc, lengths = cordlengths, verbose = TRUE)

cordcqn_offset <- cordcqn_obj$glm.offset

cordcqn_normfactors <- exp(cordcqn_offset)

cordcqn_normfactors <- cordcqn_normfactors / exp(rowMeans(log(cordcqn_normfactors)))

saveRDS(cordcqn_normfactors, "cordcqn_normfactors.rds")

# ▒▒▒ DESEQ2 ANALYSIS ▒▒▒ ------------------------------------------------

cordconditions <- data.frame(row.names = colnames(cordcountsF), condition = factor(c(rep("hFUS", 4), rep("P525L", 4))))

cordconditions$litter <- factor(c(rep("A", 6), rep("B", 2)))

# With CQN

ddscordcqnL <- DESeqDataSetFromMatrix(countData = cordcountsF, colData = cordconditions, design = ~ litter + condition)

normalizationFactors(ddscordcqnL) <- cordcqn_normfactors

ddscordcqnL <- DESeq(ddscordcqnL)

rescordcqnL <- results(ddscordcqnL, contrast = c("condition", "P525L", "hFUS"))

write.csv(as.data.frame(rescordcqnL), "deseq2_cord_star_CQN_10_4wL.csv")

saveRDS(rescordcqnL, "rescordcqnL.rds")

set.seed(2024)

ddscordcqn <- DESeqDataSetFromMatrix(countData = cordcountsF, colData = cordconditions, design = ~ condition)

normalizationFactors(ddscordcqn) <- cordcqn_normfactors

ddscordcqn <- DESeq(ddscordcqn)

rescordcqn <- results(ddscordcqn, contrast = c("condition", "P525L", "hFUS"))

write.csv(as.data.frame(rescordcqn), "deseq2_cord_star_CQN_10_4w2.csv")

saveRDS(rescordcqnL, "rescordcqn.rds")

# Without CQN

ddscord <- DESeqDataSetFromMatrix(countData = cordcountsF, colData = cordconditions, design = ~ condition)

ddscord <- DESeq(ddscord)

rescord <- results(ddscord, contrast = c("condition", "P525L", "hFUS"))

write.csv(as.data.frame(rescord), "deseq2_cord_star_10_4w.csv")

saveRDS(rescord, "rescord.rds")

# ▒▒▒ DIAGNOSTIC PLOTS ▒▒▒ ----------------------------------------------

# Length bias

pdf("GeneLength_vs_log2FC_CQN_comparisonCord.pdf", width = 16, height = 5, pointsize = 18)

par(mfrow = c(1, 2))

lowess_len_before <- lowess(log2(cordlengths), rescord$log2FoldChange, f = 0.5)

r2_len_before <- cor(rescord$log2FoldChange, approx(lowess_len_before$x, lowess_len_before$y, xout = log2(cordlengths))$y, use = "complete.obs")^2

par(mgp = c(2, 0.6, 0)) # Default is c(3, 1, 0)

plot(log2(cordlengths), rescord$log2FoldChange, xlab = "log2(Gene Length)", ylab = "log2 Fold Change", main = "Gene length vs log2FC (before CQN)",

pch = 20, col = "gray40", cex = 0.3, ylim = c(-1.5, 1.5))

lines(lowess_len_before, col = "blue", lwd = 2)

abline(h = 0, col = "black", lty = 2)

text(x = 5.5, y = 1.4,

labels = paste("Pseudo R² =", round(r2_len_before, 4)), pos = 4, col = "blue", cex = 0.9)

lowess_len_after <- lowess(log2(cordlengths), rescordcqn$log2FoldChange, f = 0.5)

r2_len_after <- cor(rescordcqn$log2FoldChange, approx(lowess_len_after$x, lowess_len_after$y, xout = log2(cordlengths))$y, use = "complete.obs")^2

plot(log2(cordlengths), rescordcqn$log2FoldChange, xlab = "log2(Gene Length)", ylab = "log2 Fold Change", main = "Gene length vs log2FC (after CQN)",

pch = 20, col = "gray40", cex = 0.3, ylim = c(-1.5, 1.5))

lines(lowess_len_after, col = "blue", lwd = 2)

abline(h = 0, col = "black", lty = 2)

text(x = 5.5, y = 1.4,

labels = paste("Pseudo R² =", round(r2_len_after, 4)), pos = 4, col = "blue", cex = 0.9)

dev.off()

# GC bias

pdf("GC_vs_log2FC_CQN_comparisonCord.pdf", width = 16, height = 5, pointsize = 18)

par(mfrow = c(1, 2))

lowess_gc_before <- lowess(cordgc, rescord$log2FoldChange, f = 0.5)

r2_gc_before <- cor(rescord$log2FoldChange, approx(lowess_gc_before$x, lowess_gc_before$y, xout = cordgc)$y, use = "complete.obs")^2

par(mgp = c(2, 0.6, 0)) # Default is c(3, 1, 0)

plot(cordgc, rescord$log2FoldChange, xlab = "GC Content", ylab = "log2 Fold Change", main = "GC vs log2FC (before CQN)",

pch = 20, col = "gray40", cex = 0.3, ylim = c(-1.5, 1.5))

lines(lowess_gc_before, col = "blue", lwd = 2)

abline(h = 0, col = "black", lty = 2)

text(x = 0.21, y = 1.4,

labels = paste("Pseudo R² =", round(r2_gc_before, 4)), pos = 4, col = "blue", cex = 0.9)

lowess_gc_after <- lowess(cordgc, rescordcqn$log2FoldChange, f = 0.5)

r2_gc_after <- cor(rescordcqn$log2FoldChange, approx(lowess_gc_after$x, lowess_gc_after$y, xout = cordgc)$y, use = "complete.obs")^2

plot(cordgc, rescordcqn$log2FoldChange, xlab = "GC Content", ylab = "log2 Fold Change", main = "GC vs log2FC (after CQN)",

pch = 20, col = "gray40", cex = 0.3, ylim = c(-1.5, 1.5))

lines(lowess_gc_after, col = "blue", lwd = 2)

abline(h = 0, col = "black", lty = 2)

text(x = 0.21, y = 1.4,

labels = paste("Pseudo R² =", round(r2_gc_after, 4)), pos = 4, col = "blue", cex = 0.9)

dev.off()

#TA

# ▒▒▒ SETUP ▒▒▒ -----------------------------------------------------------

set.seed(2024)

library(DESeq2)

library(cqn)

# Load raw count data

counts <- read.table("P525LTAcounts1.txt", header = TRUE, row.names = 1, comment.char = "#")

counts <- counts[, 6:ncol(counts)] # Drop annotation columns

# Filtering: retain genes with ≥10 counts in ≥4 samples

keep <- rowSums(counts >= 10) >= 4

TAcountsF <- counts[keep, ]

saveRDS(TAcountsF, "TAcountsF.rds")

# ▒▒▒ LOAD ANNOTATION ▒▒▒ ------------------------------------------------

TAgene_info <- read.csv("gene_info_TA1.csv")

rownames(TAgene_info) <- TAgene_info$gene_id

TAgene_infoF <- TAgene_info[rownames(TAcountsF), ]

TAgc <- TAgene_infoF$Wgc

TAlengths <- TAgene_infoF$Wlength

saveRDS(TAgene_infoF, "TAgene_infoF.rds")

# ▒▒▒ CQN NORMALIZATION ▒▒▒ ----------------------------------------------

TAcqn_obj <- cqn(counts = TAcountsF, x = TAgc, lengths = TAlengths, verbose = TRUE)

TAcqn_offset <- TAcqn_obj$glm.offset

TAcqn_normfactors <- exp(TAcqn_offset)

TAcqn_normfactors <- TAcqn_normfactors / exp(rowMeans(log(TAcqn_normfactors)))

saveRDS(TAcqn_normfactors, "TAcqn_normfactors.rds")

# ▒▒▒ DESEQ2 ANALYSIS ▒▒▒ ------------------------------------------------

# Define metadata inline

TAconditions <- data.frame(

row.names = colnames(TAcountsF),

condition = factor(c(rep("P525L", 4), rep("hFUS", 4)))

)

# DESeq2 object with CQN

ddsTAcqn <- DESeqDataSetFromMatrix(countData = TAcountsF, colData = TAconditions, design = ~ condition)

normalizationFactors(ddsTAcqn) <- TAcqn_normfactors

ddsTAcqn <- DESeq(ddsTAcqn)

resTAcqn <- results(ddsTAcqn, contrast = c("condition", "P525L", "hFUS"))

write.csv(as.data.frame(resTAcqn), "deseq2_TA_star_CQN_10_4w.csv")

saveRDS(resTAcqn, "resTAcqn.rds")

# DESeq2 object without CQN

ddsTA <- DESeqDataSetFromMatrix(countData = TAcountsF, colData = TAconditions, design = ~ condition)

ddsTA <- DESeq(ddsTA)

resTA <- results(ddsTA, contrast = c("condition", "P525L", "hFUS"))

write.csv(as.data.frame(resTA), "deseq2_TA_star_10_4w.csv")

saveRDS(resTA, "resTA.rds")

# ▒▒▒ DIAGNOSTIC PLOTS ▒▒▒ ----------------------------------------------

# Gene length bias

pdf("GeneLength_vs_log2FC_CQN_comparisonTA.pdf", width = 16, height = 5, pointsize = 18)

par(mfrow = c(1, 2))

lowess_len_before <- lowess(log2(TAlengths), resTA$log2FoldChange, f = 0.5)

r2_len_before <- cor(resTA$log2FoldChange, approx(lowess_len_before$x, lowess_len_before$y, xout = log2(TAlengths))$y, use = "complete.obs")^2

par(mgp = c(2, 0.6, 0)) # Default is c(3, 1, 0)

plot(log2(TAlengths), resTA$log2FoldChange, xlab = "log2(Gene Length)", ylab = "log2 Fold Change", main = "Gene length vs log2FC (before CQN)",

pch = 20, col = "gray40", cex = 0.3, ylim = c(-2, 3))

lines(lowess_len_before, col = "blue", lwd = 2)

abline(h = 0, col = "black", lty = 2)

text(x = 5.5, y = 2.9,

labels = paste("Pseudo R² =", round(r2_len_before, 4)), pos = 4, col = "blue", cex = 0.9)

lowess_len_after <- lowess(log2(TAlengths), resTAcqn$log2FoldChange, f = 0.5)

r2_len_after <- cor(resTAcqn$log2FoldChange, approx(lowess_len_after$x, lowess_len_after$y, xout = log2(TAlengths))$y, use = "complete.obs")^2

plot(log2(TAlengths), resTAcqn$log2FoldChange, xlab = "log2(Gene Length)", ylab = "log2 Fold Change", main = "Gene length vs log2FC (after CQN)",

pch = 20, col = "gray40", cex = 0.3, ylim = c(-2, 3))

lines(lowess_len_after, col = "blue", lwd = 2)

abline(h = 0, col = "black", lty = 2)

text(x = 5.5, y = 2.9,

labels = paste("Pseudo R² =", round(r2_len_after, 4)), pos = 4, col = "blue", cex = 0.9)

dev.off()

# GC content bias

pdf("GC_vs_log2FC_CQN_comparisonTA.pdf", width = 16, height = 5, pointsize = 18)

par(mfrow = c(1, 2))

lowess_gc_before <- lowess(TAgc, resTA$log2FoldChange, f = 0.5)

r2_gc_before <- cor(resTA$log2FoldChange, approx(lowess_gc_before$x, lowess_gc_before$y, xout = TAgc)$y, use = "complete.obs")^2

par(mgp = c(2, 0.6, 0)) # Default is c(3, 1, 0)

plot(TAgc, resTA$log2FoldChange, xlab = "GC Content", ylab = "log2 Fold Change", main = "GC vs log2FC (before CQN)",

pch = 20, col = "gray40", cex = 0.3, ylim = c(-2, 3))

lines(lowess_gc_before, col = "blue", lwd = 2)

abline(h = 0, col = "black", lty = 2)

text(x = 0.21, y = 2.9,

labels = paste("Pseudo R² =", round(r2_gc_before, 4)), pos = 4, col = "blue", cex = 0.9)

lowess_gc_after <- lowess(TAgc, resTAcqn$log2FoldChange, f = 0.5)

r2_gc_after <- cor(resTAcqn$log2FoldChange, approx(lowess_gc_after$x, lowess_gc_after$y, xout = TAgc)$y, use = "complete.obs")^2

plot(TAgc, resTAcqn$log2FoldChange, xlab = "GC Content", ylab = "log2 Fold Change", main = "GC vs log2FC (after CQN)",

pch = 20, col = "gray40", cex = 0.3, ylim = c(-2, 3))

lines(lowess_gc_after, col = "blue", lwd = 2)

abline(h = 0, col = "black", lty = 2)

text(x = 0.21, y = 2.9,

labels = paste("Pseudo R² =", round(r2_gc_after, 4)), pos = 4, col = "blue", cex = 0.9)

dev.off()

#hetko

# ▒▒▒ SETUP ▒▒▒ -----------------------------------------------------------

set.seed(2024)

library(DESeq2)

library(cqn)

# Load and filter raw counts

hk_raw <- read.table("hetkocounts1.txt", header = TRUE, row.names = 1, comment.char = "#")

hk_counts <- hk_raw[, 6:ncol(hk_raw)] # Drop annotation columns

keep <- rowSums(hk_counts >= 10) >= 4

hkcountsF <- hk_counts[keep, ]

saveRDS(hkcountsF, "hkcountsF.rds")

# ▒▒▒ LOAD ANNOTATION ▒▒▒ ------------------------------------------------

hkgene_info <- read.csv("gene_info_hetko.csv")

rownames(hkgene_info) <- hkgene_info$gene_id

hkgene_infoF <- hkgene_info[rownames(hkcountsF), ]

hkgc <- hkgene_infoF$Wgc

hklengths <- hkgene_infoF$Wlength

saveRDS(hkgene_infoF, "hkgene_infoF.rds")

# ▒▒▒ CQN NORMALIZATION ▒▒▒ ----------------------------------------------

hkcqn_obj <- cqn(counts = hkcountsF, x = hkgc, lengths = hklengths, verbose = TRUE)

hkcqn_offset <- hkcqn_obj$glm.offset

hkcqn_normfactors <- exp(hkcqn_offset)

hkcqn_normfactors <- hkcqn_normfactors / exp(rowMeans(log(hkcqn_normfactors)))

saveRDS(hkcqn_normfactors, "hkcqn_normfactors.rds")

# ▒▒▒ DESEQ2 ANALYSIS ▒▒▒ ------------------------------------------------

hetkoconditions <- data.frame(row.names = colnames(hkcountsF), condition = factor(c(rep("HetKO", 4), rep("WT", 4))))

# With CQN

ddshkcqn <- DESeqDataSetFromMatrix(countData = hkcountsF, colData = hetkoconditions, design = ~ condition)

normalizationFactors(ddshkcqn) <- hkcqn_normfactors

ddshkcqn <- DESeq(ddshkcqn)

reshkcqn <- results(ddshkcqn, contrast = c("condition", "HetKO", "WT"))

write.csv(as.data.frame(reshkcqn), "deseq2_hk_star_CQN_10_4w.csv")

saveRDS(reshkcqn, "reshkcqn.rds")

# Without CQN

ddshk <- DESeqDataSetFromMatrix(countData = hkcountsF, colData = hetkoconditions, design = ~ condition)

ddshk <- DESeq(ddshk)

reshk <- results(ddshk, contrast = c("condition", "HetKO", "WT"))

write.csv(as.data.frame(reshk), "deseq2_hk_star_10_4w.csv")

saveRDS(reshk, "reshk.rds")

# ▒▒▒ DIAGNOSTIC PLOTS ▒▒▒ ----------------------------------------------

# Length bias

pdf("GeneLength_vs_log2FC_CQN_comparisonHetKO.pdf", width = 16, height = 5, pointsize = 18)

par(mfrow = c(1, 2))

lowess_len_before <- lowess(log2(hklengths), reshk$log2FoldChange, f = 0.5)

r2_len_before <- cor(reshk$log2FoldChange, approx(lowess_len_before$x, lowess_len_before$y, xout = log2(hklengths))$y, use = "complete.obs")^2

par(mgp = c(2, 0.6, 0)) # Default is c(3, 1, 0)

plot(log2(hklengths), reshk$log2FoldChange, xlab = "log2(Gene Length)", ylab = "log2 Fold Change", main = "Gene length vs log2FC (before CQN)",

pch = 20, col = "gray40", cex = 0.3, ylim = c(-1.5, 2.5))

lines(lowess_len_before, col = "blue", lwd = 2)

abline(h = 0, col = "black", lty = 2)

text(x = 5.5, y = 2.3,

labels = paste("Pseudo R² =", round(r2_len_before, 4)), pos = 4, col = "blue", cex = 0.9)

lowess_len_after <- lowess(log2(hklengths), reshkcqn$log2FoldChange, f = 0.5)

r2_len_after <- cor(reshkcqn$log2FoldChange, approx(lowess_len_after$x, lowess_len_after$y, xout = log2(hklengths))$y, use = "complete.obs")^2

plot(log2(hklengths), reshkcqn$log2FoldChange, xlab = "log2(Gene Length)", ylab = "log2 Fold Change", main = "Gene length vs log2FC (after CQN)",

pch = 20, col = "gray40", cex = 0.3, ylim = c(-1.5, 2.5))

lines(lowess_len_after, col = "blue", lwd = 2)

abline(h = 0, col = "black", lty = 2)

text(x = 5.5, y = 2.3,

labels = paste("Pseudo R² =", round(r2_len_after, 4)), pos = 4, col = "blue", cex = 0.9)

dev.off()

# GC bias

pdf("GC_vs_log2FC_CQN_comparisonHetKO.pdf", width = 16, height = 5, pointsize = 18)

par(mfrow = c(1, 2))

lowess_gc_before <- lowess(hkgc, reshk$log2FoldChange, f = 0.5)

r2_gc_before <- cor(reshk$log2FoldChange, approx(lowess_gc_before$x, lowess_gc_before$y, xout = hkgc)$y, use = "complete.obs")^2

par(mgp = c(2, 0.6, 0)) # Default is c(3, 1, 0)

plot(hkgc, reshk$log2FoldChange, xlab = "GC Content", ylab = "log2 Fold Change", main = "GC vs log2FC (before CQN)",

pch = 20, col = "gray40", cex = 0.3, ylim = c(-1.5, 2.5))

lines(lowess_gc_before, col = "blue", lwd = 2)

abline(h = 0, col = "black", lty = 2)

text(x = 0.21, y = 2.4,

labels = paste("Pseudo R² =", round(r2_gc_before, 4)), pos = 4, col = "blue", cex = 0.9)

lowess_gc_after <- lowess(hkgc, reshkcqn$log2FoldChange, f = 0.5)

r2_gc_after <- cor(reshkcqn$log2FoldChange, approx(lowess_gc_after$x, lowess_gc_after$y, xout = hkgc)$y, use = "complete.obs")^2

plot(hkgc, reshkcqn$log2FoldChange, xlab = "GC Content", ylab = "log2 Fold Change", main = "GC vs log2FC (after CQN)",

pch = 20, col = "gray40", cex = 0.3, ylim = c(-1.5, 2.5))

lines(lowess_gc_after, col = "blue", lwd = 2)

abline(h = 0, col = "black", lty = 2)

text(x = 0.21, y = 2.4,

labels = paste("Pseudo R² =", round(r2_gc_after, 4)), pos = 4, col = "blue", cex = 0.9)

dev.off()

#CQN normalization reduced the association between GC content and fold change from pseudo R² = 0.058 to 0.01, mitigating GC-dependent bias. Similar for length

Volcano plots and correlation plots (RStudio)

library(ggrepel)

library(ggplot2)

library(tidyverse)

rescordcqn <- readRDS("rescordcqn.rds")

resTAcqn <- readRDS("resTAcqn.rds")

reshkcqn <- readRDS("reshkcqn.rds")

rescordcqn_df <- as.data.frame(rescordcqn)

rescordcqn_df$gene <- rownames(rescordcqn_df)

resTAcqn_df <- as.data.frame(resTAcqn)

resTAcqn_df$gene <- rownames(resTAcqn_df)

reshkcqn_df <- as.data.frame(reshkcqn)

reshkcqn_df$gene <- rownames(reshkcqn_df)

###Volcano plots Fig 3###

make_volcano <- function(df, filename, title, xlim = c(-2, 2)) {

# --- Consistent volcano theme (Point 4) ---

theme_volcano <- theme_classic(base_size = 20) +

theme(

axis.title = element_text(size = 24),

axis.text = element_text(size = 22),

plot.title = element_text(size = 27, face = "bold")

)

# --- Data prep ---

df$gene <- rownames(df)

df$significance <- ifelse(df$padj < 0.1, "padj < 0.1", "Not Sig")

min_p <- min(df$pvalue[df$pvalue > 0], na.rm = TRUE)

df$pvalue[df$pvalue == 0] <- min_p

df$log10pvalue <- pmin(-log10(df$pvalue), 10)

df$log2FC_capped <- pmax(pmin(df$log2FoldChange, 2.5), -2.5)

custom_palette <- c("padj < 0.1" = "#8B00A9", "Not Sig" = "grey60")

# --- Plot + save ---

ggsave(

filename = filename,

plot = ggplot(df, aes(log2FC_capped, log10pvalue)) +

geom_point(

data = subset(df, significance == "padj < 0.1"),

aes(color = significance),

alpha = 0.8, size = 2

) +

geom_point(

data = subset(df, significance == "Not Sig"),

color = "grey60", alpha = 0.6, size = 1

) +

geom_point(

data = subset(df, gene == "ENSMUSG00000030795"),

aes(color = significance),

shape = 21, fill = "#A61AC5", size = 2.5

) +

geom_vline(

xintercept = 0, linetype = "dotted",

color = "darkgrey", linewidth = 0.3

) +

scale_x_continuous(breaks = seq(-2.5, 2.5, 1), limits = xlim) +

scale_y_continuous(breaks = seq(0, 10, 2), limits = c(0, 10)) +

scale_color_manual(values = custom_palette) +

theme_volcano + # <-- integrated here

labs(

title = title,

x = expression(log[2]~"Fold Change"),

y = expression(-log[10]~"p-value")

),

width = 8, height = 6, units = "in", device = "svg"

)

}

make_volcano(rescordcqn, "cordVolcano0.a1.svg",

expression("hFUS/hFUS"^"P525L"*" vs hFUS/hFUS (SC)"))

make_volcano(resTAcqn, "TAVolcano0.1a.svg",

expression("hFUS/hFUS"^"P525L"*" vs hFUS/hFUS (TA)"),

xlim = c(-2, 2.5))

make_volcano(reshkcqn, "hkVolcano0.1a.svg",

expression("Fus"^"+/-"*" vs wild type (SC)"))

### Correlation plots Fig 3###

**#SC vs TA Correlation overlap plot#**

# Step 1: Define relaxed sets

SC_relaxed <- rownames(rescordcqn_df[

(!is.na(rescordcqn_df$padj) & rescordcqn_df$padj < 0.1) |

(!is.na(rescordcqn_df$pvalue) & rescordcqn_df$pvalue < 0.05), ])

TA_relaxed <- rownames(resTAcqn_df[

(!is.na(resTAcqn_df$padj) & resTAcqn_df$padj < 0.1) |

(!is.na(resTAcqn_df$pvalue) & resTAcqn_df$pvalue < 0.05), ])

# Step 2: Define padj < 0.1 sets

SC_padj <- rownames(rescordcqn_df[ !is.na(rescordcqn_df$padj) & rescordcqn_df$padj < 0.1, ])

TA_padj <- rownames(resTAcqn_df[ !is.na(resTAcqn_df$padj) & resTAcqn_df$padj < 0.1, ])

# Union set

union_genes <- union(SC_padj, TA_padj)

# Build data frame

FC_df_union <- data.frame(

gene = union_genes,

SC_log2FC = rescordcqn_df[union_genes, "log2FoldChange"],

TA_log2FC = resTAcqn_df[union_genes, "log2FoldChange"]

)

FC_df_union <- subset(FC_df_union, is.finite(SC_log2FC) & is.finite(TA_log2FC))

# Category assignment

FC_df_union$category <- "Single"

FC_df_union$category[FC_df_union$gene %in% intersect(SC_padj, TA_padj)] <- "Overlap"

FC_df_union$category[FC_df_union$gene %in% union(

intersect(SC_padj, TA_relaxed),

intersect(TA_padj, SC_relaxed)

)] <- "Relaxed"

FC_df_union$category[FC_df_union$gene %in% intersect(SC_padj, TA_padj)] <- "Overlap"

# Rename Overlap → Strict

FC_df_union$category[FC_df_union$category == "Overlap"] <- "Strict"

# Filter out "Single"

FC_df_union_filtered <- subset(FC_df_union, category != "Single")

# FUS marker

FC_df_union_filtered$fus_marker <- FC_df_union_filtered$gene == "ENSMUSG00000030795"

# Regression analysis

model_union <- lm(SC_log2FC ~ TA_log2FC, data = FC_df_union_filtered)

slope <- coef(model_union)[2]

intercept <- coef(model_union)[1]

r_squared <- summary(model_union)$r.squared

p_val <- summary(model_union)$coefficients[2, 4]

cor_test <- cor.test(FC_df_union_filtered$SC_log2FC, FC_df_union_filtered$TA_log2FC)

# Color scheme

category_fills <- c(

"Relaxed" = "#E69F00",

"Strict" = "#A61AC5")

# Plot

union_plot <- ggplot(FC_df_union_filtered, aes(x = TA_log2FC, y = SC_log2FC)) +

# Relaxed (diamond)

geom_point(

data = subset(FC_df_union_filtered, category == "Relaxed" & !fus_marker),

aes(fill = category),

shape = 23, size = 2.3, color = "#E69F00", stroke = 0.7, alpha = 0.7) +

# Strict (circle, size 2.5)

geom_point(

data = subset(FC_df_union_filtered, category == "Strict" & !fus_marker),

aes(fill = category),

shape = 21, size = 2.5, color = "#8B00A9", stroke = 0.4) +

# FUS (Strict but larger, size 2.8)

geom_point(

data = subset(FC_df_union_filtered, fus_marker),

aes(fill = category),

shape = 21, size = 2.8, color = "#8B00A9", stroke = 0.4) +

geom_smooth(method = "lm", se = FALSE, color = "black",

linetype = "dashed", linewidth = 0.5) +

geom_vline(xintercept = 0, linetype = "dotted",

color = "darkgrey", linewidth = 0.3) +

geom_hline(yintercept = 0, linetype = "dotted",

color = "darkgrey", linewidth = 0.3) +

annotate(

"text",

x = min(FC_df_union_filtered$TA_log2FC, na.rm = TRUE) - 0.2,

y = max(FC_df_union_filtered$SC_log2FC, na.rm = TRUE) - 0.2,

label = paste0(

"r = ", round(cor_test$estimate, 3),

"\ny = ", round(slope, 3), "x + ", round(intercept, 3),

"\nR² = ", round(r_squared, 3),

"\np = ", signif(p_val, 3)

),

hjust = 0, vjust = 0, size = 6) +

coord_fixed(ratio = 1) +

coord_cartesian(xlim = c(-1.1, 1.3), ylim = c(-1.1, 1.3)) +

labs(

title = expression("SC vs TA Fold Change"),

x = expression("P525L TA log"[2]*" Fold Change"),

y = expression("P525L SC log"[2]*" Fold Change")

) +

scale_fill_manual(values = category_fills) +

theme_classic(base_size = 20) +

theme(

axis.title = element_text(size = 24),

axis.text = element_text(size = 20),

plot.title = element_text(size = 27, face = "bold"),

legend.title = element_blank(),

legend.text = element_text(size = 20))

ggsave("FC_SC_vs_TA_overlap.svg", union_plot,

width = 8, height = 6, units = "in", device = "svg")

**#CORD vs HK PLOT#**

rescordcqn_df <- as.data.frame(rescordcqn)

rescordcqn_df$gene <- rownames(rescordcqn_df)

reshkcqn_df <- as.data.frame(reshkcqn)

reshkcqn_df$gene <- rownames(reshkcqn_df)

# Significance sets

CORD_pval <- rownames(rescordcqn_df[!is.na(rescordcqn_df$pvalue) & rescordcqn_df$pvalue < 0.05, ])

HK_pval <- rownames(reshkcqn_df[!is.na(reshkcqn_df$pvalue) & reshkcqn_df$pvalue < 0.05, ])

CORD_padj <- rownames(rescordcqn_df[!is.na(rescordcqn_df$padj) & rescordcqn_df$padj < 0.1, ])

HK_padj <- rownames(reshkcqn_df[!is.na(reshkcqn_df$padj) & reshkcqn_df$padj < 0.1, ])

CORD_relaxed <- union(CORD_padj, CORD_pval)

HK_relaxed <- union(HK_padj, HK_pval)

# Category assignment

all_genes <- CORD_padj

category <- rep("None", length(all_genes))

names(category) <- all_genes

category[names(category) %in% union(

intersect(CORD_padj, HK_relaxed),

intersect(HK_padj, CORD_relaxed)

)] <- "Relaxed"

category[names(category) %in% intersect(CORD_padj, HK_padj)] <- "Strict"

# Build FC dataframe

FC_df_cord_hk <- data.frame(

gene = names(category),

CORD_log2FC = rescordcqn_df[names(category), "log2FoldChange"],

HK_log2FC = reshkcqn_df[names(category), "log2FoldChange"],

category = category)

FC_df_cord_hk <- subset(FC_df_cord_hk, is.finite(CORD_log2FC) & is.finite(HK_log2FC))

FC_df_cord_hk$fus_marker <- FC_df_cord_hk$gene == "ENSMUSG00000030795"

# Regression

model <- lm(CORD_log2FC ~ HK_log2FC, data = FC_df_cord_hk)

slope <- coef(model)[2]

intercept <- coef(model)[1]

r_squared <- summary(model)$r.squared

p_val <- summary(model)$coefficients[2, 4]

cor_test <- cor.test(FC_df_cord_hk$CORD_log2FC, FC_df_cord_hk$HK_log2FC)

# Legend shapes, fills, outlines

category_shapes <- c(

"None" = 23, # open diamond

"Relaxed" = 23, # filled diamond

"Strict" = 21 # filled circle

)

category_fills <- c(

"None" = "#FFFFFF", # open

"Relaxed" = "#E69F00", # orange

"Strict" = "#A61AC5" # purple fill

)

category_colors <- c(

"None" = "#E69F00", # orange outline

"Relaxed" = "#E69F00", # orange outline

"Strict" = "#8B00A9" # purple outline

)

cord_hk_plot <- ggplot(FC_df_cord_hk, aes(x = HK_log2FC, y = CORD_log2FC)) +

# NONE (open diamond, single outline, in legend)

geom_point(

data = subset(FC_df_cord_hk, category == "None" & !fus_marker),

aes(shape = category, fill = category, color = category),

size = 1.4, stroke = 0.5, alpha = 0.8) +

# RELAXED (filled diamond)

geom_point(

data = subset(FC_df_cord_hk, category == "Relaxed" & !fus_marker),

aes(shape = category, fill = category, color = category),

size = 2.3, stroke = 0.7, alpha = 0.7) +

# STRICT (filled circle)

geom_point(

data = subset(FC_df_cord_hk, category == "Strict" & !fus_marker),

aes(shape = category, fill = category, color = category),

size = 2.5, stroke = 0.4) +

# FUS (Strict but larger)

geom_point(

data = subset(FC_df_cord_hk, fus_marker),

aes(shape = category, fill = category, color = category),

size = 2.8, stroke = 0.4) +

geom_smooth(method = "lm", se = FALSE, color = "black",

linetype = "dashed", linewidth = 0.5) +

geom_vline(xintercept = 0, linetype = "dotted",

color = "darkgrey", linewidth = 0.3) +

geom_hline(yintercept = 0, linetype = "dotted",

color = "darkgrey", linewidth = 0.3) +

annotate(

"text",

x = min(FC_df_cord_hk$HK_log2FC, na.rm = TRUE) + 0.9,

y = max(FC_df_cord_hk$CORD_log2FC, na.rm = TRUE) - 0.1,

label = paste0(

"r = ", round(cor_test$estimate, 3),

"\ny = ", round(slope, 3), "x + ", round(intercept, 3),

"\nR² = ", round(r_squared, 3),

"\np = ", signif(p_val, 3)

),

hjust = 0, vjust = 0, size = 6) +

coord_fixed(ratio = 1) +

coord_cartesian(xlim = c(-1.1, 1.3), ylim = c(-1.1, 1.3)) +

labs(

title = expression("P525L SC vs Fus"^"+/-"*" SC Fold Change"),

x = expression("Fus"^"+/-"*" SC log"[2]*" Fold Change"),

y = expression("P525L SC log"[2]*" Fold Change")) +

scale_shape_manual(values = category_shapes) +

scale_fill_manual(values = category_fills) +

scale_color_manual(values = category_colors) +

theme_classic(base_size = 20) +

theme(

axis.title = element_text(size = 24),

axis.text = element_text(size = 20),

plot.title = element_text(size = 27, face = "bold"),

legend.title = element_blank(),

legend.text = element_text(size = 20))

ggsave(

"CORD_vs_HK.svg",

cord_hk_plot,

width = 8, height = 6, units = "in",

device = "svg")

**#TA vs HK PLOT#**

resTAcqn_df <- as.data.frame(resTAcqn)

resTAcqn_df$gene <- rownames(resTAcqn_df)

reshkcqn_df <- as.data.frame(reshkcqn)

reshkcqn_df$gene <- rownames(reshkcqn_df)

# Significance sets

TA_pval <- rownames(resTAcqn_df[!is.na(resTAcqn_df$pvalue) & resTAcqn_df$pvalue < 0.05, ])

HK_pval <- rownames(reshkcqn_df[!is.na(reshkcqn_df$pvalue) & reshkcqn_df$pvalue < 0.05, ])

TA_padj <- rownames(resTAcqn_df[!is.na(resTAcqn_df$padj) & resTAcqn_df$padj < 0.1, ])

HK_padj <- rownames(reshkcqn_df[!is.na(reshkcqn_df$padj) & reshkcqn_df$padj < 0.1, ])

TA_relaxed <- union(TA_padj, TA_pval)

HK_relaxed <- union(HK_padj, HK_pval)

# Category assignment

all_genes <- TA_padj

category <- rep("None", length(all_genes))

names(category) <- all_genes

category[names(category) %in% union(

intersect(TA_padj, HK_relaxed),

intersect(HK_padj, TA_relaxed)

)] <- "Relaxed"

category[names(category) %in% intersect(TA_padj, HK_padj)] <- "Strict"

# Build FC dataframe

FC_df_ta_hk <- data.frame(

gene = names(category),

TA_log2FC = resTAcqn_df[names(category), "log2FoldChange"],

HK_log2FC = reshkcqn_df[names(category), "log2FoldChange"],

category = category)

FC_df_ta_hk <- subset(FC_df_ta_hk, is.finite(TA_log2FC) & is.finite(HK_log2FC))

FC_df_ta_hk$fus_marker <- FC_df_ta_hk$gene == "ENSMUSG00000030795"

# Regression

model <- lm(TA_log2FC ~ HK_log2FC, data = FC_df_ta_hk)

slope <- coef(model)[2]

intercept <- coef(model)[1]

r_squared <- summary(model)$r.squared

p_val <- summary(model)$coefficients[2, 4]

cor_test <- cor.test(FC_df_ta_hk$TA_log2FC, FC_df_ta_hk$HK_log2FC)

# Legend shapes, fills, outlines (same as your working version)

category_shapes <- c(

"None" = 23, # open diamond (white fill trick)

"Relaxed" = 23, # filled diamond

"Strict" = 21 # filled circle

)

category_fills <- c(

"None" = "#FFFFFF", # white fill to avoid double outline

"Relaxed" = "#E69F00",

"Strict" = "#A61AC5")

category_colors <- c(

"None" = "#E69F00", # outline for open diamond

"Relaxed" = "#E69F00",

"Strict" = "#8B00A9")

ta_hk_plot <- ggplot(FC_df_ta_hk, aes(x = HK_log2FC, y = TA_log2FC)) +

# NONE (open diamond, single outline)

geom_point(

data = subset(FC_df_ta_hk, category == "None" & !fus_marker),

aes(shape = category, fill = category, color = category),

size = 1.4, stroke = 0.5, alpha = 0.8) +

# RELAXED (filled diamond)

geom_point(

data = subset(FC_df_ta_hk, category == "Relaxed" & !fus_marker),

aes(shape = category, fill = category, color = category),

size = 2.3, stroke = 0.7, alpha = 0.7) +

# STRICT (filled circle)

geom_point(

data = subset(FC_df_ta_hk, category == "Strict" & !fus_marker),

aes(shape = category, fill = category, color = category),

size = 2.5, stroke = 0.4) +

# FUS (Strict but larger)

geom_point(

data = subset(FC_df_ta_hk, fus_marker),

aes(shape = category, fill = category, color = category),

size = 2.8, stroke = 0.4) +

geom_smooth(method = "lm", se = FALSE, color = "black",

linetype = "dashed", linewidth = 0.5) +

geom_vline(xintercept = 0, linetype = "dotted",

color = "darkgrey", linewidth = 0.3) +

geom_hline(yintercept = 0, linetype = "dotted",

color = "darkgrey", linewidth = 0.3) +

annotate(

"text",

x = min(FC_df_ta_hk$HK_log2FC, na.rm = TRUE) + 1.2,

y = max(FC_df_ta_hk$TA_log2FC, na.rm = TRUE) + 0.1,

label = paste0(

"r = ", round(cor_test$estimate, 3),

"\ny = ", round(slope, 3), "x + ", round(intercept, 3),

"\nR² = ", round(r_squared, 3),

"\np = ", signif(p_val, 3)

),

hjust = 0, vjust = 1, size = 6) +

coord_fixed(ratio = 1) +

coord_cartesian(xlim = c(-1.1, 1.3), ylim = c(-1.1, 1.3)) +

labs(

title = expression("P525L TA vs Fus"^"+/-"*" SC Fold Change"),

x = expression("Fus"^"+/-"*" SC log"[2]*" Fold Change"),

y = expression("P525L TA log"[2]*" Fold Change")) +

scale_shape_manual(values = category_shapes) +

scale_fill_manual(values = category_fills) +

scale_color_manual(values = category_colors) +

theme_classic(base_size = 20) +

theme(

axis.title = element_text(size = 24),

axis.text = element_text(size = 20),

plot.title = element_text(size = 27, face = "bold"),

legend.title = element_blank(),

legend.text = element_text(size = 20))

ggsave(

"TA_vs_HK.svg",

ta_hk_plot,

width = 8, height = 6, units = "in",

device = "svg")

**###Mitochondria plots Fig4###**

**###volcano plots with curated mitochondrial list overlay (54 genes)**

make_volcano <- function(df, filename, title, xlim = c(-2, 2)) {

# --- Consistent volcano theme (Point 4) ---

theme_volcano <- theme_classic(base_size = 20) +

theme(

axis.title = element_text(size = 24),

axis.text = element_text(size = 22),

plot.title = element_text(size = 27, face = "bold")

)

# --- Curated mitochondrial gene list ---

mito_genes <- c(

"ENSMUSG00000066595","ENSMUSG00000040740","ENSMUSG00000033871","ENSMUSG00000064341","ENSMUSG00000064371",

"ENSMUSG00000020715","ENSMUSG00000046994","ENSMUSG00000045374","ENSMUSG00000027381","ENSMUSG00000026489",

"ENSMUSG00000027099","ENSMUSG00000064360","ENSMUSG00000062373","ENSMUSG00000021622","ENSMUSG00000064357",

"ENSMUSG00000064358","ENSMUSG00000064345","ENSMUSG00000022092","ENSMUSG00000060679","ENSMUSG00000042148",

"ENSMUSG00000029361","ENSMUSG00000027601","ENSMUSG00000038462","ENSMUSG00000032902","ENSMUSG00000074064",

"ENSMUSG00000018428","ENSMUSG00000005299","ENSMUSG00000024259","ENSMUSG00000025525","ENSMUSG00000026103",

"ENSMUSG00000043683","ENSMUSG00000018796","ENSMUSG00000028383","ENSMUSG00000042010","ENSMUSG00000029776",

"ENSMUSG00000046603","ENSMUSG00000010914","ENSMUSG00000000168","ENSMUSG00000044080","ENSMUSG00000031352",

"ENSMUSG00000068523","ENSMUSG00000032330","ENSMUSG00000029486","ENSMUSG00000026568","ENSMUSG00000041733",

"ENSMUSG00000021371","ENSMUSG00000000563","ENSMUSG00000048486","ENSMUSG00000004789","ENSMUSG00000025940",

"ENSMUSG00000038612","ENSMUSG00000021764","ENSMUSG00000031924","ENSMUSG00000025971")

# --- Data prep ---

df$gene <- rownames(df)

df$highlight_mito <- df$gene %in% mito_genes

df$significance <- ifelse(df$padj < 0.1, "padj < 0.1", "Not Sig")

min_p <- min(df$pvalue[df$pvalue > 0], na.rm = TRUE)

df$pvalue[df$pvalue == 0] <- min_p

df$log10pvalue <- pmin(-log10(df$pvalue), 10)

df$log2FC_capped <- pmax(pmin(df$log2FoldChange, 2.5), -2.5)

custom_palette <- c("padj < 0.1" = "#8B00A9", "Not Sig" = "grey60")

# --- Plot + save ---

ggsave(

filename = filename,

plot = ggplot(df, aes(log2FC_capped, log10pvalue)) +

# Significant

geom_point(

data = subset(df, significance == "padj < 0.1"),

aes(color = significance),

alpha = 0.8, size = 2

) +

# Not significant

geom_point(

data = subset(df, significance == "Not Sig"),

color = "grey60", alpha = 0.6, size = 1

) +

# FUS highlight

geom_point(

data = subset(df, gene == "ENSMUSG00000030795"),

aes(color = significance),

shape = 21, fill = "#A61AC5", size = 2.5

) +

# Mitochondrial gene highlight (blue triangle)

geom_point(

data = subset(df, highlight_mito),

shape = 24, # triangle

fill = "#56B4E9",

color = "#**004B73**",

alpha = 0.8,

stroke = 0.3,

size = 2.5

) +

geom_vline(

xintercept = 0, linetype = "dotted",

color = "darkgrey", linewidth = 0.3

) +

scale_x_continuous(breaks = seq(-2.5, 2.5, 1), limits = xlim) +

scale_y_continuous(breaks = seq(0, 10, 2), limits = c(0, 10)) +

scale_color_manual(values = custom_palette) +

theme_volcano + # <-- integrated here

labs(

title = title,

x = expression(log[2]~"Fold Change"),

y = expression(-log[10]~"p-value")

),

width = 8, height = 6, units = "in", device = "svg"

)

}

make_volcano(rescordcqn, "cordVolcano0.1amito.svg",

expression("hFUS/hFUS"^"P525L"*" vs hFUS/hFUS (SC)"))

make_volcano(resTAcqn, "TAVolcano0.1amito.svg",

expression("hFUS/hFUS"^"P525L"*" vs hFUS/hFUS (TA)"),

xlim = c(-2, 2.5))

make_volcano(reshkcqn, "hkVolcano0.1amito.svg",

expression("Fus"^"+/-"*" vs wild type (SC)"))
