# Supplementary material
Source: Research Square preprint supplement (doi:10.21203/rs.3.rs-9043045/v2)
Supplement: Supplementary file 3 [file a452f51f0034848276f5a4e1.xlsx]

## Sheet: Title page
	Supplementary data file 2: Acta Neuropathologica
	Early mitochondrial gene dysregulation precedes motor neuron degeneration in genomically humanised FUS mutant mice
	Georgia Price1,2, Graciana de Azambuja11, Chloe Williams3, David Thompson1,2, Charlotte Tibbit1, Zeinab Ali1,4, Adele Austin1, Mhoriam Ahmed6, Andrew Tosolini6,7,8, Anny Devoy5,6, Gemma F Codner1, Lydia Teboul1, Linda Greensmith6, Giampietro Schiavo6,9, Sandrine da Cruz11, Elizabeth MC Fisher1,6,*, Thomas J Cunningham1,10,*
	1. Mary Lyon Centre at MRC Harwell, Harwell, UK
	2. Nuffield Department of Clinical Neurosciences, University of Oxford, Oxford, UK
	3. Department of Medical and Translational Biology, Faculty of Medicine, Umeå University, Sweden
	4. Department of Physiology, Anatomy and Genetics, University of Oxford, Oxford, UK
	5. Dementia Research Institute, King's College London, London, UK
	6. UCL Queen Square Motor Neuron Disease Centre, Department of Neuromuscular Diseases, UCL Queen Square Institute of Neurology, UCL, London, UK
	7. Australian Institute for Bioengineering and Nanotechnology, University of Queensland, Brisbane, Australia
	8. School of Biomedical Sciences, Faculty of Health, Medicine and Behavioural Sciences, The University of Queensland, St Lucia, Australia.
	9. Dementia Research Institute, University College London, London, UK
	10. Institute of Prion Diseases, MRC Prion Unit, UCL, London, UK
	11. VIB-KU Leuven Center for Neuroscience (CNL), Department of Neurosciences, KU Leuven, Leuven Brain Institute, Belgium
	* Joint senior authors
	Corresponding author email: tom.cunningham@ucl.ac.uk

## Sheet: Fig. 1b
Survival
Age (days)	hFUS/hFUS	hFUS/hFUSP525L
83	0
83	0
83	0
83	0
67	0
67	0
67	0
96	0
189	0
92	0
71	0
67	0
78	0
67	0
78	0
66	0
66	0
78	0
67	0
90	0
90	0
90	0
25	0
20	0
38	0
38	0
33	0
33	0
123	0
123	0
154	0
154	0
129	1
154	0
151	0
77	0
77	0
77	0
120	0
135	0
135	0
149	0
149	0
151	0
151	0
151	0
73	0
73	0
183	0
125	0
125	0
61	0
61	0
61	0
48	0
48	0
48	0
48	0
99	0
79	0
79	0
151	0
151	0
54	0
151	0
78	0
78	0
78	0
154	0
65	0
70	0
70	0
121	0
53	0
56	0
56	0
56	0
56	0
56	0
100	0
121	0
53	0
127	0
127	0
76	0
76	0
73	0
73	0
73	0
115	0
115	0
115	0
115	0
115	0
96	0
96	0
96	0
57	0
38	1
38	1
100	0
100	0
100	0
126	0
149	0
149	0
149	0
162	0
162	0
415	0
161	0
161	0
126	0
126	0
126	0
126	0
149	0
87	0
87	0
354	0
354	0
630	0
637	0
127	0
637	0
127	0
631	0
597	1
637	0
602	1
637	0
643	0
126	0
337	0
337	0
337	0
316	0
331	0
334	0
121	0
126	0
126	0
126	0
126	0
83	0
51	0
51	0
84	0
109	0
109	0
109	0
109	0
92	0
131	0
131	0
66	0
66	0
90	0
90	0
79	0
79	0
172	0
172	0
25	0
177	0
177	0
297	0
136	0
136	0
76	0
76	0
76	0
57	0
297	0
49	0
49	0
57	0
57	0
57	0
159	0
181	0
181	0
181	0
178	0
469	0
113	0
130	0
68	0
485	0
485	0
159	0
159	0
55	0
55	0
55	0
159	0
129	0
129	0
129	0
162	0
162	0
58	0
133	0
133	0
161	0
391	0
391	0
373	1
65	0
123	0
123	0
129	0
139	0
139	0
385	0
385	0
45	0
89	0
89	0
136	0
389	0
126	0
126	0
57	0
57	0
57	0
71	0
71	0
73	0
73	0
73	0
100	0
87	1
100	0
126	0
137	0
126	0
132	0
132	0
132	0
161	0
161	0
316	0
161	0
131	0
131	0
131	0
55	0
112	0
29	0
112	0
460	0
70	0
122	0
297	1
126	0
143	0
143	0
143	0
144	0
232	0
64	0
562	0
566	0
454	0
436	0
155	0
126	0
126	0
126	0
170	0
170	0
316	0
209	0
127	0
127	0
66	1
130	0
130	0
130	0
191		0
189		0
66		1
96		0
189		0
189		0
166		0
211		0
71		1
101		0
70		0
70		0
198		0
198		0
113		0
198		0
164		0
70		0
28		1
86		0
118		0
133		0
242		0
285		0
208		0
254		0
254		0
290		0
314		0
211		0
186		0
180		0
180		0
72		0
72		0
99		0
189		0
198		0
149		0
149		0
47		1
197		0
37		0
152		0
184		0
184		0
151		0
121		0
136		0
175		0
178		0
113		0
121		0
282		0
282		0
276		0
127		0
105		0
105		0
228		0
150		0
491		1
637		0
126		0
126		0
126		0
199		0
232		0
643		0
644		0
638		0
204		0
204		0
231		0
112		0
636		1
643		0
638		0
126		0
126		0
219		0
157		1
630		0
630		0
410		1
126		0
360		0
150		0
360		0
637		0
337		0
331		0
121		0
121		0
126		0
126		0
169		0
169		0
96		0
155		0
141		0
141		0
90		0
90		0
70		0
70		0
70		0
172		0
177		0
177		0
208		0
228		0
228		0
297		0
136		0
136		0
151		0
190		0
292		0
385		0
566		0
153		0
469		0
469		0
485		0
430		0
159		0
159		0
159		0
395		0
162		0
386		0
386		1
379		1
161		0
383		0
323		0
189		0
376		0
376		0
315		1
382		0
382		0
207		1
385		0
171		0
392		0
392		0
107		0
337		0
337		0
390		0
390		0
294		1
322		0
567		0
50		1
31		0
31		1
126		0
126		0
127		0
127		0
139		0
53		1
177		0
152		1
177		0
23		1
40		0
23		1
493		0
316		0
401		0
112		0
119		0
26		1
170		1
460		0
330		0
434		0
41		1
192		0
84		1
207		0
20		1
454		0
99		0
23		1
40		1
126		0
34		1
240		0
162		0
168		0
231		0
231		0
232		0
232		0
232		0
288		0
288		0
209		0
151		0
87		1
209		0
209		0
163		0
163		0
163		0
63		1
229		0

## Sheet: Fig. 1c
Nuclear FUS depeletion
hFUS/hFUS	hFUS/hFUSP525L
100	84.8238
100	81.7391
100	86.6071

## Sheet: Fig. 1e
FUS RNA expression spinal cord
hFUS/hFUS	hFUS/hFUSP525L
1.02322	1.06808
1	1.15577
0.934737	1.16438
1.04643	1.15325
0.976396	1.07848
	1.10336
	1.091
	1.02005

## Sheet: Fig. 1f
FUS protein expression spinal cord
hFUS/hFUS	hFUS/hFUSP525L
1.07771	0.624715
1.00664	0.916786
0.915642	1.07438

## Sheet: Fig. 1g
Weight
Males
	Age (weeks)	hFUS/hFUS														hFUS/hFUSP525L
8	8	28.43	26.89	28.36	23.41	27.6	24.03	26.02	26.815	27.92						22.82	24.64	24.52	24.19	23.35	22.87	22.57	24.72	23.86	23.27	25.05	23.35		24.54
12	12	32.76	29.66	32.37	27.12	32.36	29.47	29.52	31.9	31.47						25.21	27.88	26.35	27.35	26.37	25.8	26.08	29.64	27.06	26.98	27.89	26.58	24.945	27.77
16	16	36.58	32.07	35.32	29.07	35.47	30.94	31.29	35.41	34.58						26.84	29.98	28.39	29.09	27.68	27.5	28.37	32.87	29.84	28.65	29.46	28.59	26.25	29.27
20	20				30.15	36.38	32.16	32.63								28.78						28.96	34.54	29.7	29.53	30.23	29.89	26.67	30.19
24	24	39	32.5	37.38	29.835	37.725	33.195	33.29	37	37						28.915	31.09	29.03	30.01	28.82	28.31	29.59	35.69	29.69	29.825	31.07	29.955	27.135	30.45
28	28	41.24	32.86	37.7	29.52	39.07	34.23	33.95	39.4	39.6						29.05	31.45	28.51	29.63	29.37	28.76	30.22	36.84	29.68	30.12	31.91	30.02	27.6	30.71
32	32	44.18	33.2	39.08	30.75	39.26	34.63	33.48	40.7	41.05						30.53	32.28	30	30.55	30.02	29.26	30	37.69	29.79	31.08	31.86	29.98	28.5	31.35
36	36	46.49	34.83	41.1	30.74	42.2	36.09	35.19	43	44.2						30.8	32.54	29.25	31.37	30.24	29.35	30.67	40.56	31.18	30.85	33.05	30.68	29.5	30.89
40	40	47.84	36.44	42.95	31.52	42.03	37.95	34.39	46.4	47.9						30.9	32.17	26.79	31.01	29.78	29.48	31.01	42.8	31.47	31.09	33.48	30.46	30.1	31.44
44	44	50	35.88	43.83	31.72	44.13	35.85	34.48	49.16	51.16						31.21	32.88	30.24	31	30.58	30	30.77	44.57	31.25	31.16	34.09	30.48	31.16	32.96
48	48	52.53	37.02	46.3	32.4	47	39.5	35.88	50.9	53						32	33.44	30.2	32.19	30.19	30.17	32	46.8	32.2	32.83	36.42	31.86	30.8	32.8
52	52	52.99	36.03	47.88	33	49.4	41.03	36.7	51	56						32	32.76	30.07	31.94	30.16	28.23	32.5	48.6	32	33.6	35.77	31.92	30	33.1
56	56	55	38.29	51.06	32.8	49.8	41.7	37.1	51.93	57.56						32.83	33.46	29.13	32.09	30.16	30.98	32	48.2	31.5	34.22	36.61	31.78	30.78	32.45
60	60	56.5	38	52.6	32.72	50.9	44	36	53.5	60.04						35.58	33.8	31.1	32.2	29.8	31.55	32.41	49.78	31.5	35.4	37	33	32.73	32.26
64	64	56.88	38.52	52.52	33.42	52.99	44.86	37.57	54.2	60.44						32.42	32.86		33.21		31.2	33	51.64	32.15	35.45	36.24	33.61	31.12	32.54
68	68	57.09	39.46	54.5	33.2	55	43.9	36.37	53.31	60.2						33	33.65				31.48	33.2	52	32.11	35.17	35.48	32.66	31.27	32
72	72	60	39	55.5	33	53.4	42	38.63	46.71							32.5	33.4		33.2		31.6				36.48	36.16	32.71	31.56
76	76	59.12	38.96	56.08	33.41	53.31	42.02	38	44.97							30.71	32.68		32.46		31.67	31.88	52.09	31.53	35.6	36	31.85	29.93	33.11
80	80			46.24	32.8	54.75	41.98	37.63								32.28					28.35	32.16	52.37	30.65	35.98	36.18	31.97		33.38
Female
		hFUS/hFUS											hFUS/hFUSP525L
8	8	21.54	21.48	21.81	20.97	22.38	22.32	19.53	19.96	20.11	21.24		17.46	18.17	17.43	18.68	18.53		19.63	19.57	17.58	19.86	20.25
12	12	24.3	23.76	26.19	24.48	23.16	25.24	22.445	23.16	21.73	23.36		21.98	20.82	19.6	21.2	22.13	22.42	24.46	22.41	20.42	22.79	24.03
16	16	25.98	24.41	30.49	27.22	23.38	28.29	23.87	24.95	23.69	26.83		23.86	22.5	20.73	22.22	23.51	24.98	27.14	24.99	21.66	24.51	26.76
20	20		26.03	34	28.28		30.73			24.1	28.98		24.97	24.88	21.36	23.39	23.8	25.86	30.08	25.03	24.88	25	27.18
24	24		25.49	34.1	28.245		31.03			24.77	29.34		25.105	24.145	21.11	22.49	23.47		29.04	25.18	24.075	24.79	26.81
28	28	25.85	24.95	34.2	28.21		31.33	24.78	25.53	25.44	29.7		25.24	23.41	20.86	21.59	23.14		28	25.33	23.27	24.58	26.44
32	32	27.53	27.8	34.26	28.12		33.05	27.3	26.4	25.59	30.98		27.85	23.51	22.28	26.48	23.67		26.24	25.36	24.98	28.95	29.19
36	36	27.87	28.16	39.76	32.26		34.08	27.4	27	25.9	34.07		27.44	24.94	22.09	27.95	25.19		28	30.23	26	29.78	29.86
40	40	28.69	29.89	39.94	31.98		36.79	28	26.7	25.56	33.58		28.58	28.25	22.8	26.91	25.22		30.57	27.79	27.6	29.4	30.51
44	44	29.68	31.03	40.2	34.38		37.62	29.48	29.83	26.16	33.54		30.03	28.48	23.04	27.35	26.39		31.98	27.04	29.42	31.27	30.97
48	48	29.82	33.5	44.2	36.5		39	29.5	30.2	28.3	36.9		30.7	29	23	30.01	26.38		31	27	32.5	30.5	33.2
52	52	30.36	34.6	44	37.8		41.5	32	31	29	38		31.7	29.7	23.7	29.48	27.73		31.6	30	33.3	31	33.2
56	56	31.3	35	46	38		42	33.69	32.55	31	67		31.7	29.81	23.25	29.3	28.18		32.6	30	33.9	31.29	33
60	60	32.3	34.5	45.36	38.57		43.49	34.95	34.66	33.5			33.05	29.45	23.39	30	29.2		32.3	30.25	33.4	27.83	32.95
64	64	32.13	36.48	47.74	39.9		43.98	33.84	35.38	35.81			33.35	30.53	24.05	31.28	30.86		32.07	31.27	35.98	29.52	33.86
68	68	31	32.32	45.37	36			31.7	31.42	32.18			28.73	26.71	22.76	26.08	25.65		28.12	26.88	27.49	25.88	28.5
72	72	36	35	44	36			31.8	33.62				32.38			31.44	29.29		30	29		27.49
76	76	37.08	37.14	47.45	39.27			33.82	35.38	33.96			31.78		23.94	30.1	29		33.75	31.55		28.41	32.51
80	80		40.18	48.48	40.15					35.17			33.68		24.9	30.13	29.35		33.58	31.5		28.88	33.24
84	84	39.61						36.58	36.08							28.22	32.22					28.76
88	88	40.08	42	49.75	42.74			37.82	37.7	35.58			33.77		24.71				32.84	31.18		27.03	35
92	92	38.2	42.67					36.03	36.55	36.65			32.95		25.75		32.05		34.01	31.74			33.83

## Sheet: Fig. 1h
EchoMRI
Male % fat mass
	hFUS/hFUS														hFUS/hFUSP525L
6m	21.88	16.48	9.01	7.75	22.31	22.48	24.71	9.03	16.95						10.62	28.9	12.57	15	13.57	11.88	13.66	11.28	12.48	11.11	7.28	9.64	6.5	8.95
12m	35.15	29.69	13.87	12.71	34.61	40.46	34.44	16.94	33.19						19.1	36.97	18.05	20.35	20.57	15.3	19.06	15.53	22.83	17.76	9.94	14.4	9.71	18.26
18m	37.48	29.44	14.96	14.97	27.2		36.82	21.36	39.66						17.85	39.13	15.6	23.4	19.18	15.76	16.95	18.51	18.88	15.97		15.13		22.23
Male % lean mass
	hFUS/hFUS														hFUS/hFUSP525L
6m	74.52	79.45	83.49	84	73.66	73.29	70.66	86.33	78.51						84.65	66.78	82.39	80.54	81.52	83.23	81.5	83.6	81.76	83.94	87.85	85.48	85.21	85.82
12m	61.03	66.65	82.67	81.52	61.83	55.78	61.65	78.49	63.17						76.84	59.71	77.48	74.97	75.18	80.27	76.53	79.86	72.33	78.09	85.47	81.59	86.7	77.16
18m	58.21	66.48	80.89	80.18	68.31		59.4	73.23	56.74						77.46	56.44	80.23	72.07	75.48	79.79	77.88	77.2	76.08	79.38		79.61		72.21
Female % fat mass
	hFUS/hFUS											hFUS/hFUSP525L
12m	44.61	35.64	43.43	22.83	31.03	36.9	25.07	22.12				33.34	30.33	20.16	25.72	27.83	35.27	25.59	36.39	31.35	36.86	20.89
18m	45.52	35.82		29.57	38.4		25.93	28.43				32.72		19.56	24.46	25.52	38.33	30.44		19.91	33.42	32.04
Female % lean mass
	hFUS/hFUS											hFUS/hFUSP525L
12m	51.92	59.89	53.06	71.74	63.73	59.38	70.77	74.13				63.27	65.36	75.26	69.89	67.28	60.86	70.3	58.89	64.69	58.99	73.24
18m	50.97	59.5		64.77	57.59		69.49	66.45				63.33		75.46	70.99	68.99	57.86	65.27		73.77	61.61	63.13

## Sheet: Fig. 2a
Harwell grip strength data
Male
	hFUS/hFUS														hFUS/hFUSP525L
6m	167.2	192.7	204.9	180	187.9	206.5	214	199.6	193.8						178.9	216.6	208.6	162.4	236.3	133.8	149.7	215	170.9	168.8	120.5	170.4	155	180
12m	182.6	209.7	155	140.1	211.3	185.3	203.9	159.8	147.6						139.6	133.8	140.7	149.7	198	146	105.1	132.2	132.2	147.6	166.2	132.7	143.3	122.6
16m	173.1	195.4	153.9	159.8	211.3	173.1	202.3	164.6	195.4						127.9	144.9	121.6	161.9	132.7	134.3	117	132.7	151.8	137.5		132.2		161.4
18m	151.3	148.2	146.5	135.4	140.7		160.8								133.8	142.8	130.6	135.4	118.9	122.1	95	128.5	148.6	127.4		137.5
Female
	hFUS/hFUS										hFUS/hFUSP525L
6m	201.7	187.4	221.4	210.8	180.5	137.5	191.6	188.5	175.2		201.2	168.8	181	165.6	186.9	231.5	260.2	106.2	172.5	143.3
12m	185.3	193.8	171.5	183.2	196.4	153.9	202.3	176.8	136.4		185.3	130.1	164.6	169.9	162.4	155.5	190.1	190.1	142.8	155
16m	182.6	192.7	186.9		163.5	171.5		191.1	201.7		173.6		150.8	195.4	148.1	201.2	167.2		184.2	166.2
18m	174.7	137.5	178.9		156.6	158.7		148.1	144.4		132.7		140.1	147.6	131.6	135.9	153.4		143.9	139.1
23m	170.4					150.8		170.4	154.5		144.9		141		197.5	128.5	151.8			139.6

## Sheet: Fig. 2b
Harwell motor neuron counts
hFUS/hFUS	hFUS/hFUSP525L
88.8314	76.4719
98.1575	68.8121
101.105	94.1219
108.369	83.2588
103.537	95.9266

## Sheet: Fig. 2c
VIB Leuven grip strength
Males
	hFUS/hFUSP525L													hFUS/hFUS
6m	104.011	122.366	111.353	116.146	77.3965	93.6099	142.658	90.7547	59.1435	71.3801				96.873	108.09	102.991	127.465	86.6759	105.031	88.7153	127.465
12m	134.603	111.149	65.4658	48.5385	53.4331	33.5487	28.756	58.2258	63.0185	50.7819				124.405	130.524	101.972	105.031	100.952	96.873	104.011	86.6759
16m	114.82	109.925	39.7689	85.6562	74.4393	53.0252	35.6901	35.3842	78.926	25.9008				121.244	124.201	140.823	111.965	72.5018	104.521	132.869	130.014
18m	132.869	113.596	40.7886	38.7492	41.8084	43.8478	32.6309	33.4467	45.2754	60.5711				137.764	73.1137	136.54	127.261	139.395	109.925	72.5018	104.521
Females
	hFUS/hFUSP525L													hFUS/hFUS
6m	96.873	58.1238	86.6759	56.0844	70.3604	54.045	60.1633	63.2224	101.972	93.8139	91.7745	108.498		142.148	124.201	91.2646	109.823	139.497	136.234	71.5841	120.632	101.972	80.5576	101.972	99.9322	80.5576
12m	39.769	30.591	36.71	54.045	47.927	59.144	61.183	57.104	69.137	56.39	80.66	63.732		88.817	122.77	113.49	108.5	111.35	116.15	77.396	93.61	84.738	104.62	71.584	142.45	106.15
16m	59.144	30.591	29.572	35.69	21.414	45.887	57.104	39.769	57.104	53.025	48.946	55.065		75.459	122.37	104.01	117.27	67.301	113.19	101.97	115.23	142.15	136.23	71.584	120.63	120.94
18m	36.9137	69.9525	60.4692	44.5616	75.357	46.2951	71.788	60.8771	37.7295	47.9267	47.9267	29.5718		70.3604	111.149	134.603	125.425	59.1435	122.366	124.405	109.11	136.846	93.6099	142.658	136.744	104.623

[truncated: 20 more sheets: Fig. 2d, Fig. 2f, Fig. 2g, Fig. 2h, Fig. 5a, Fig. 5b, Fig. 5c, Fig. 5d, Fig. 5e, Fig. 5f, Fig. 5g, Fig. 5h, Fig. 5i, Fig.5j, Fig. 6b, Fig. 6c, Fig. 6d, Fig. 6e, Fig. 6f, Fig. 6g]
